# Supplementary material for: Transcriptomics yields valuable information regarding the response mechanisms of Chinese Min pigs infected with PEDV
Source: Frontiers journal article supplement (doi:10.3389/fvets.2023.1295723), 2023-12-11
Supplement: Image_2.pdf [file Image_2.pdf]

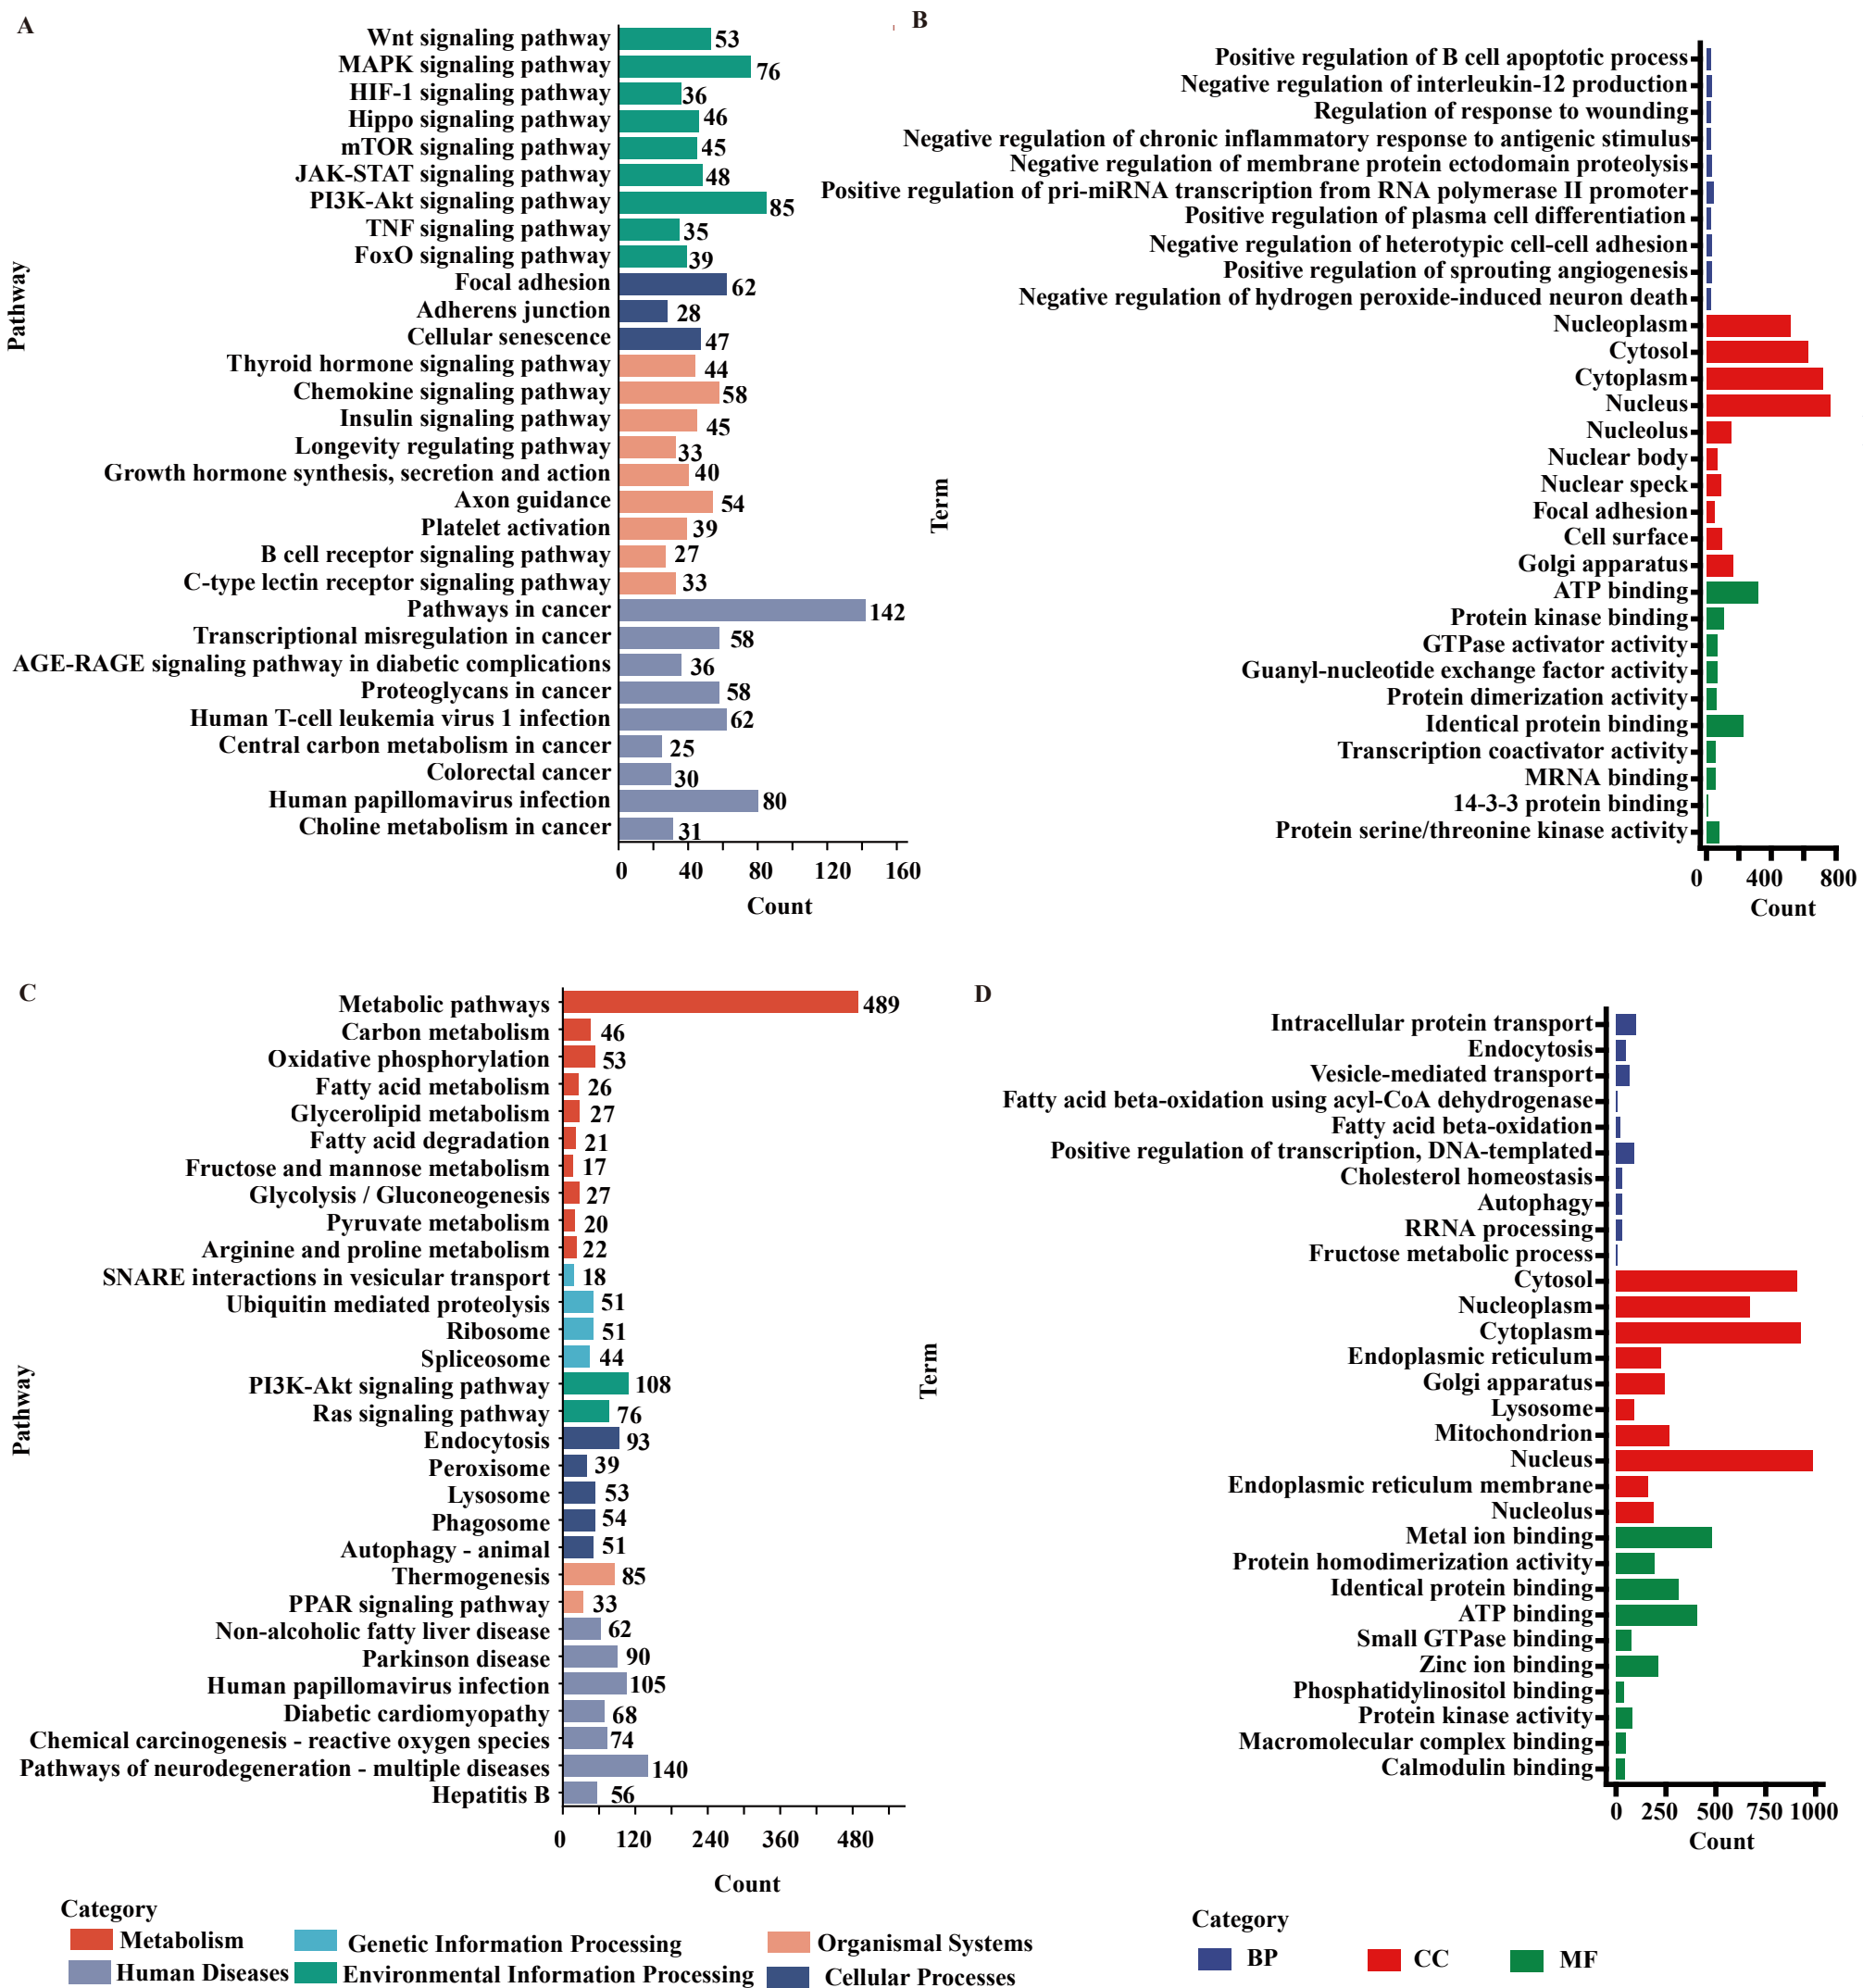

**Figure S2. The enrichments of DE lncRNAs in Min dead (MD) vs. Min control (MC) groups.** (A) KEGG pathway enriched by DE lncRNAs with significant up-regulation expression in MD vs. MC. (B) GO entries enriched by DE lncRNAs with significant up-regulation expression in MD vs. MC. (C) KEGG pathway enriched by DE lncRNAs with strong down-regulation expression in MD vs. MC. (D) GO entries enriched by DE lncRNAs with strong down-regulation expression in MD vs. MC.
