# Supplementary material for: Transcriptomics yields valuable information regarding the response mechanisms of Chinese Min pigs infected with PEDV
Source: Frontiers journal article supplement (doi:10.3389/fvets.2023.1295723), 2023-12-11
Supplement: Image_3.pdf [file Image_3.pdf]

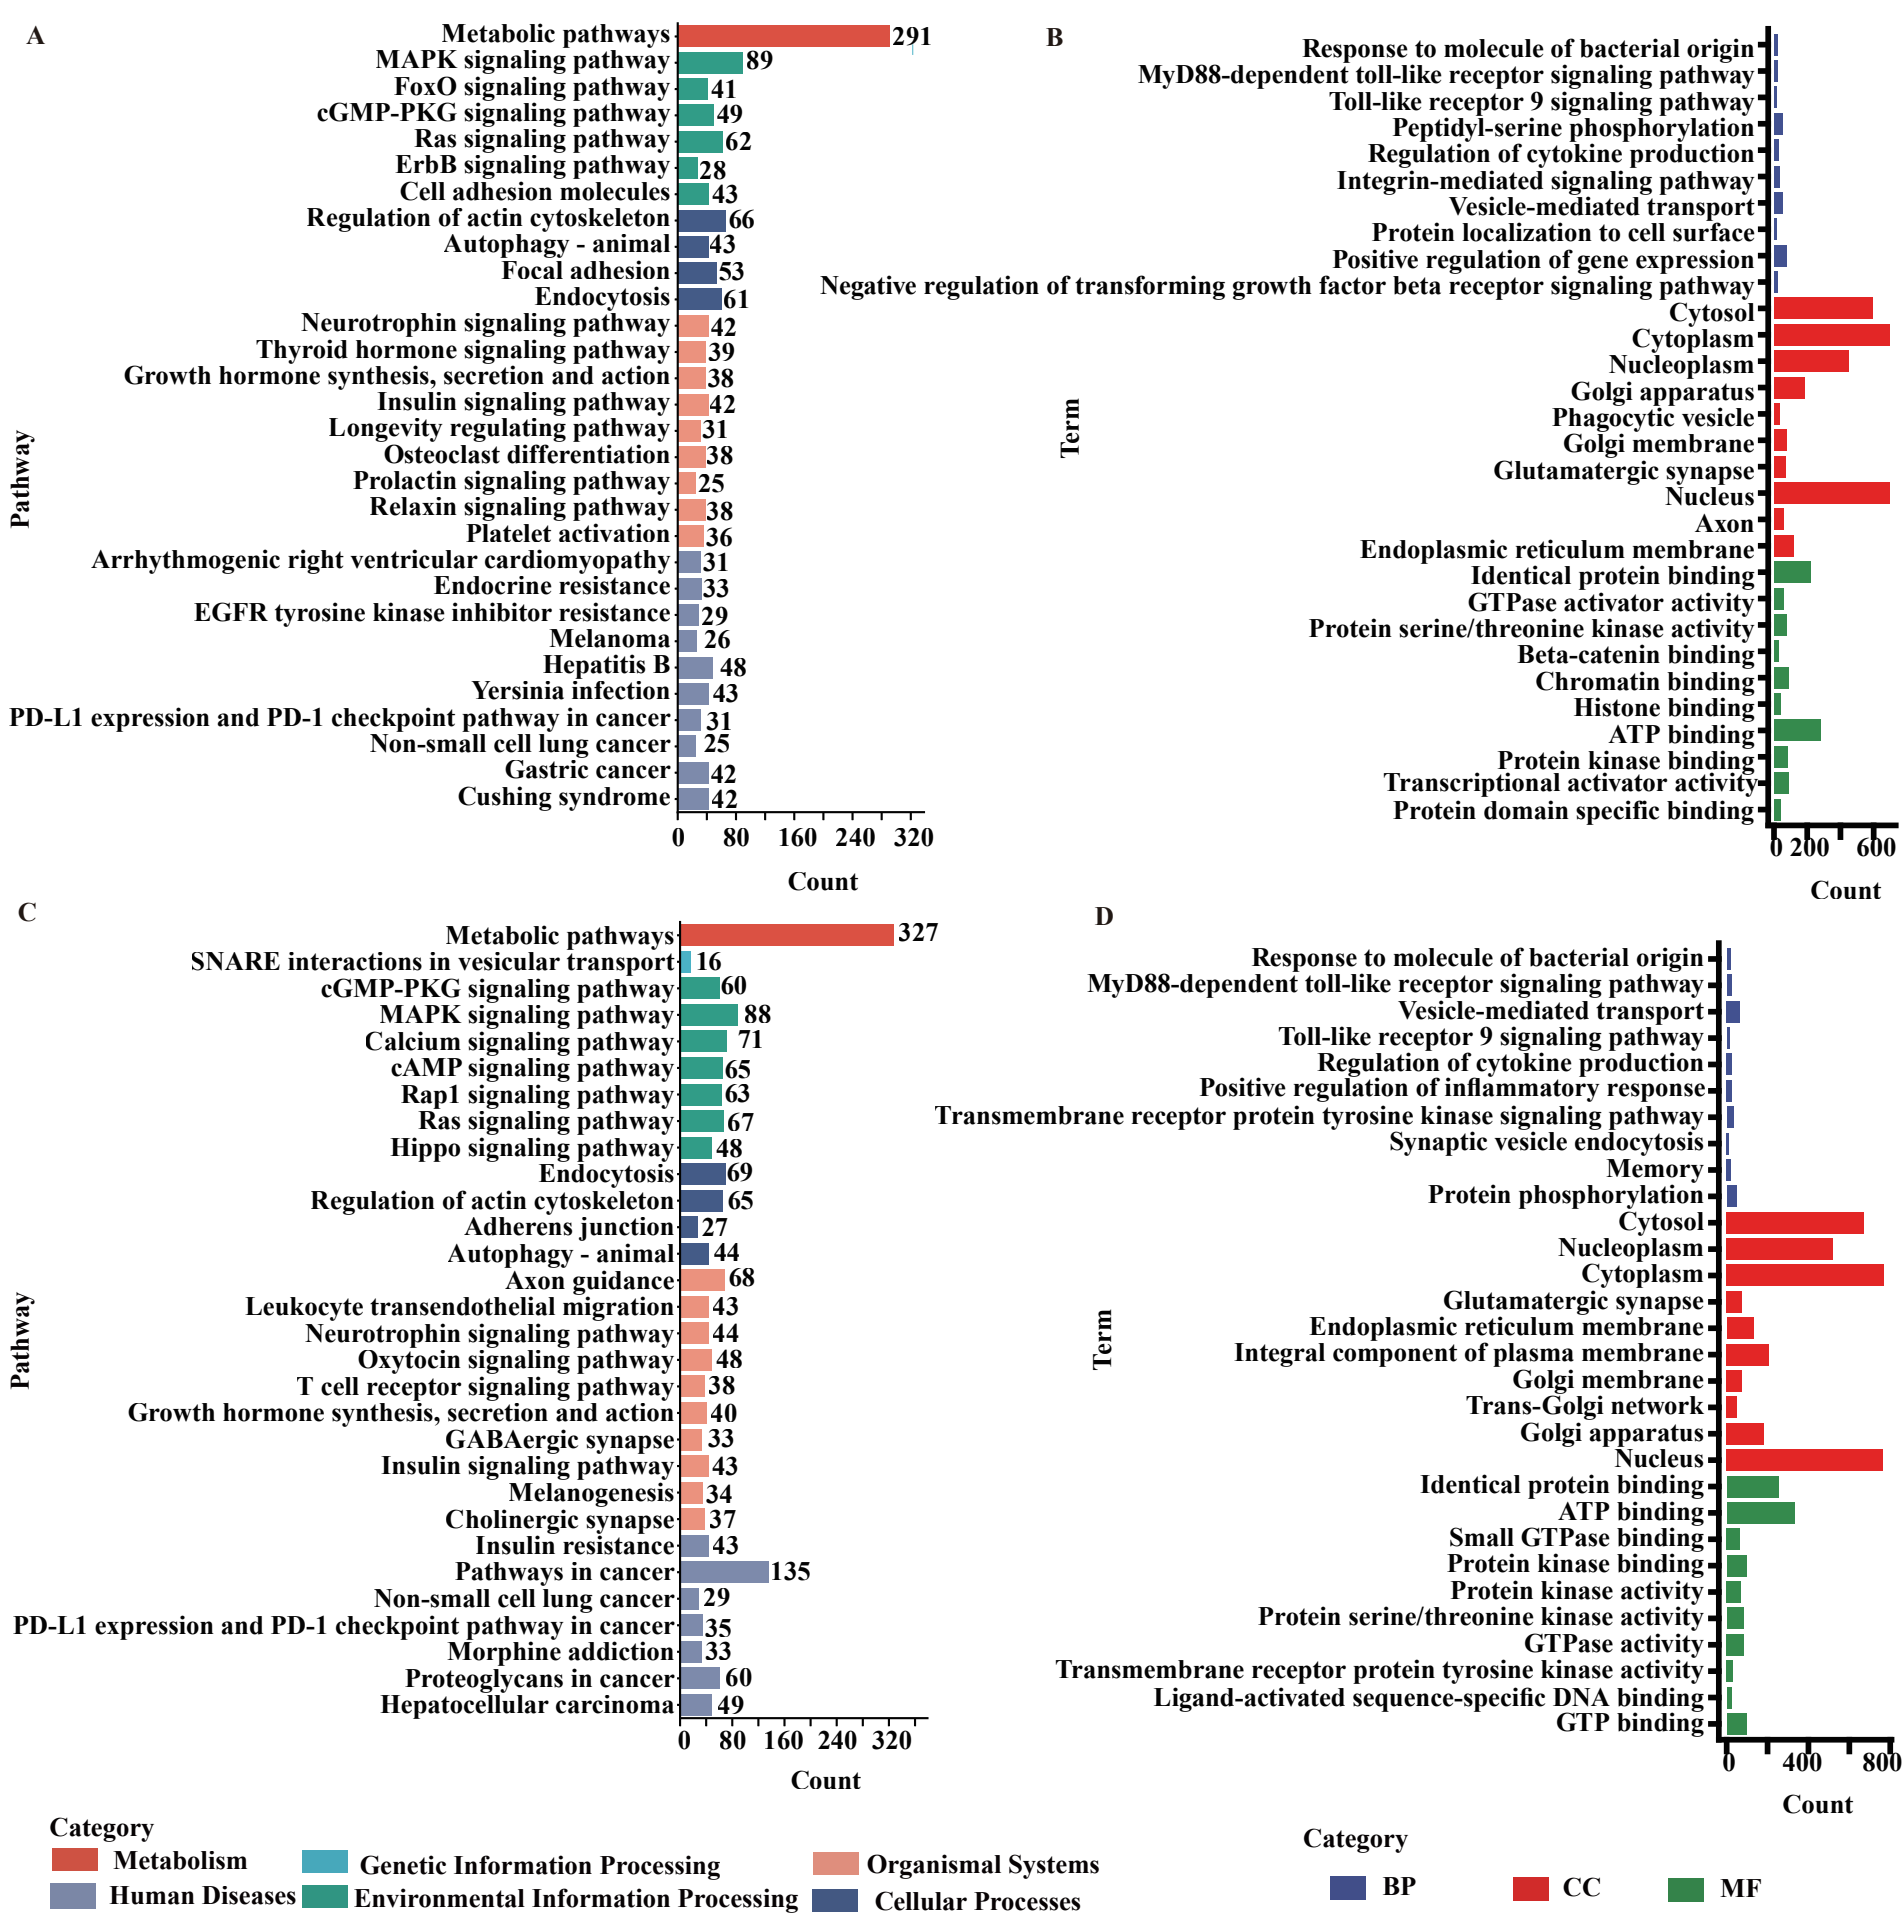

**Figure S3. The enrichments of DE miRNAs in Min dead (MD) vs. Min control (MC) groups. (A)** KEGG pathway enriched by DE miRNAs with significant up-regulation expression in MD vs. MC. **(B)** GO entries enriched by DE miRNAs with significant up-regulation expression in MD vs. MC. **(C)** KEGG pathway enriched by DE miRNAs with strong down-regulation expression in MD vs. MC. **(D)** GO entries enriched by DE miRNAs with strong down-regulation expression in MD vs. MC.
