# Supplementary material for: Transcriptomics yields valuable information regarding the response mechanisms of Chinese Min pigs infected with PEDV
Source: Frontiers journal article supplement (doi:10.3389/fvets.2023.1295723), 2023-12-11
Supplement: Image_7.pdf [file Image_7.pdf]

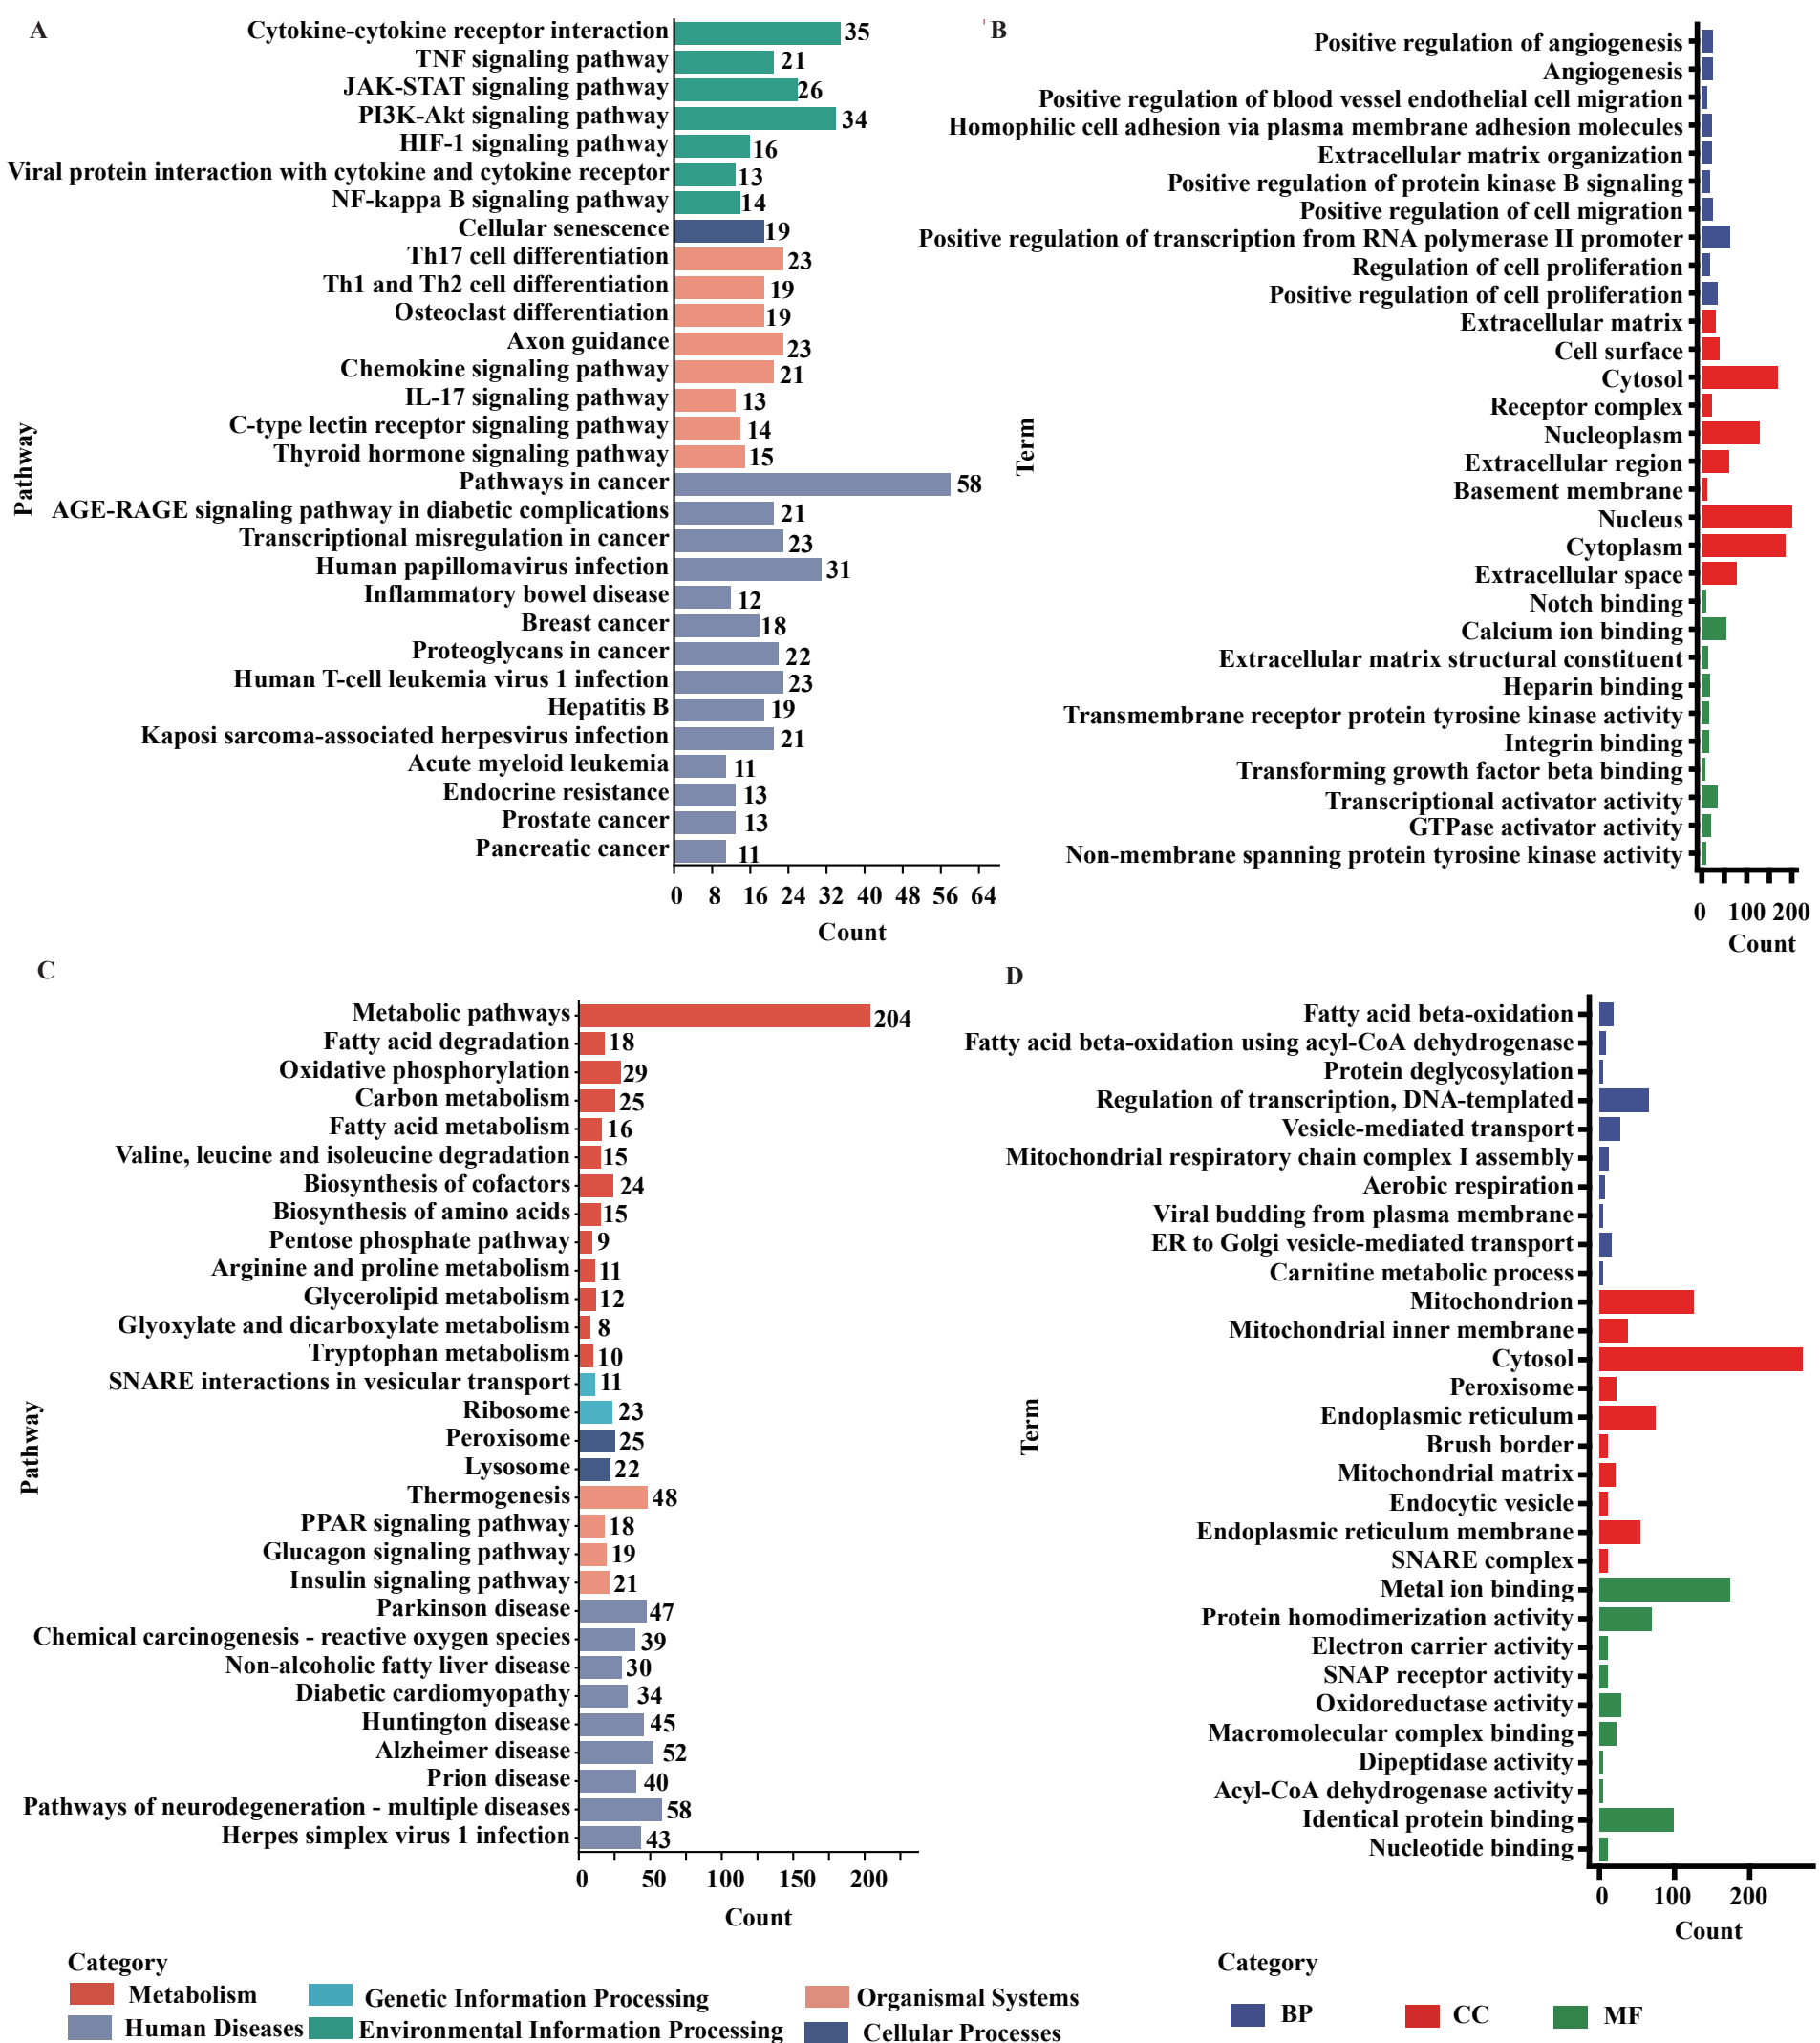

**Figure S7. The enrichments of DE lncRNAs in Min dead (MD) vs. Min resistance (MR) groups. (A)** KEGG pathway enriched by DE lncRNAs with significant up-regulation expression in MD vs. MR. **(B)** GO entries enriched by DE lncRNAs with significant up-regulation expression in MD vs. MR. **(C)** KEGG pathway enriched by DE lncRNAs with strong down-regulation expression in MD vs. MR. **(D)** GO entries enriched by DE lncRNAs with strong down-regulation expression in MD vs. MR.
