# Supplementary material for: Transcriptomics yields valuable information regarding the response mechanisms of Chinese Min pigs infected with PEDV
Source: Frontiers journal article supplement (doi:10.3389/fvets.2023.1295723), 2023-12-11
Supplement: Image_8.pdf [file Image_8.pdf]

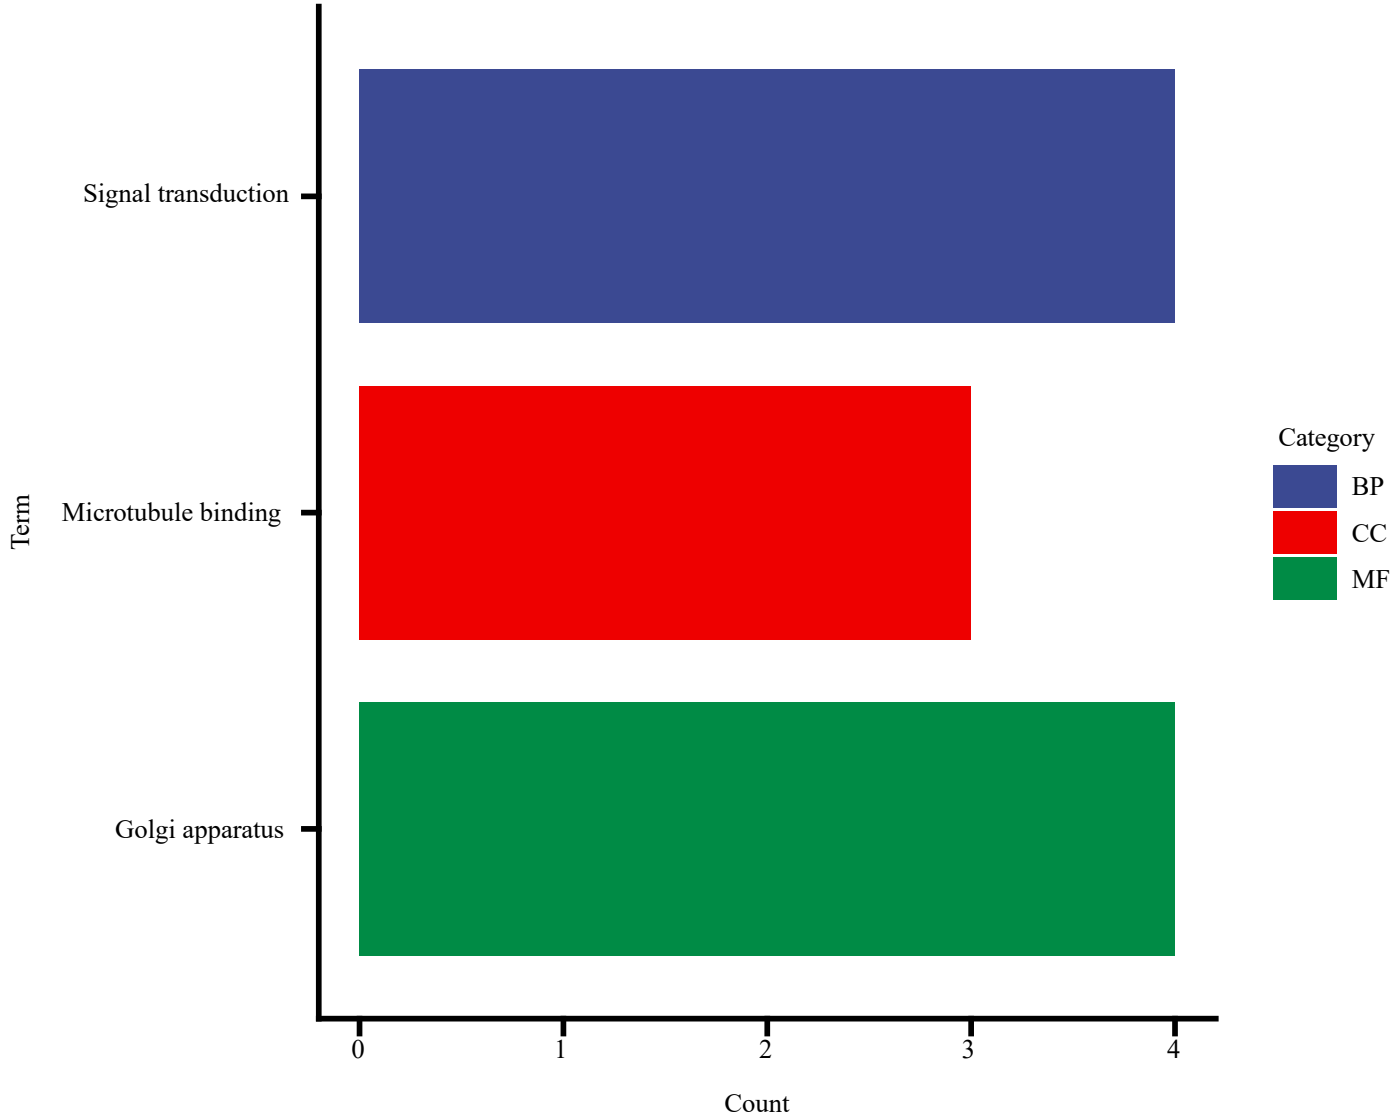

**Figure S8.** The enrichments of DE miRNAs in Min dead (MD) vs. Min resistance (MR) groups. GO entries enriched by DE miRNAs with strong down-regulation expression in MD vs. MR.
