# Supplementary material for: Transcriptomics yields valuable information regarding the response mechanisms of Chinese Min pigs infected with PEDV
Source: Front Vet Sci. 2023 Dec 11;10:1295723. doi: 10.3389/fvets.2023.1295723 (PMC10773921; doi:10.3389/fvets.2023.1295723)
Supplement: Supplementary file 10 [file Table_2.xlsx]

## Sheet: Sheet1
Table S2 The DE mRNAs, lncRNAs and miRNAs identified in this study
Dead group vs Control group	DE molecules	log2FoldChange	P-value	Adjusted P-value	Resistance group vs Control group	DE molecules	log2FoldChange	P-value	Adjusted P-value	Dead group vs Resistance group	DE molecules	log2FoldChange	P-value	Adjusted P-value
up-regulation PCGs	SLC7A1	2.65569	3.11918e-54	3.84115e-51	up-regulation PCGs	SHMT1	2.14062	3.00582e-52	6.03004e-49	up-regulation PCGs	IL17RA	1.35841	7.04876e-11	1.61094e-07
	TNIP3	5.51308	4.52596e-52	5.17544e-49		SLC7A5	2.88846	3.54938e-52	6.32933e-49		TGM1	2.57827	7.68579e-11	1.61094e-07
	PIM3	3.1163	9.24168e-49	7.3975e-46		ANG	3.75433	3.67357e-49	4.53516e-46		ARG1	3.9227	7.55178e-11	1.61094e-07
	SLC7A5	3.38127	4.46176e-48	2.85713e-45		SLC38A5	3.01481	7.33929e-48	8.41345e-45		ENSSSCG00000042520	1.64828	2.38982e-11	1.61094e-07
	LPL	4.19341	7.21983e-45	3.9856e-42		HMGA1	4.17707	5.7742e-45	4.63351e-42		ENSSSCG00000050377	2.40401	4.28364e-11	1.61094e-07
	PYCR1	2.31029	1.11251e-44	5.93672e-42		ND4	2.96348	1.01998e-43	6.54788e-41		ENSSSCG00000050715	3.884	7.50617e-11	1.61094e-07
	SRM	3.89231	7.67237e-44	3.87504e-41		TADA2B	1.75661	1.49033e-43	9.19935e-41		PIM3	1.35324	1.30964e-09	2.40188e-06
	PRR16	5.16331	1.3856e-42	5.68771e-40		FUS	3.3561	2.0218e-41	1.0816e-38		ENSSSCG00000051747	3.43287	2.6446e-09	3.88015e-06
	TGM1	5.57173	9.44934e-42	3.78186e-39		ENSSSCG00000021560	2.57324	2.12725e-41	1.1013e-38		ENSSSCG00000053150	2.00389	2.4462e-09	3.88015e-06
	SLC1A5	2.32219	1.10377e-40	4.10935e-38		ENSSSCG00000059526	3.78932	5.16021e-41	2.58801e-38		PLAU	1.95178	3.09533e-09	4.02152e-06
	NUP188	2.14144	9.15217e-40	3.25594e-37		PIK3C2G	5.52578	1.45686e-40	6.87681e-38		ENSSSCG00000053593	2.7834	3.28914e-09	4.02152e-06
	HK3	3.99361	3.51534e-37	1.04217e-34		ND5	2.32596	2.56396e-39	1.08287e-36		LRRC32	1.98483	5.59176e-09	6.31095e-06
	ENSSSCG00000033894	2.25191	1.10954e-36	3.06252e-34		PTBP1	1.89132	8.16919e-39	3.27768e-36		ENSSSCG00000022925	2.60792	9.58946e-09	8.79353e-06
	DNER	2.99118	4.2799e-36	1.10511e-33		VILL	2.7037	9.72446e-39	3.80653e-36		DNAH17	2.21164	1.28589e-08	1.1098e-05
	CEBPB	2.76837	7.92666e-36	1.98278e-33		H2AC6	3.77151	6.65563e-38	2.37369e-35		NUPR1	2.01041	1.96979e-08	1.6056e-05
	AMPD2	2.38715	1.24518e-34	2.80762e-32		ERRFI1	3.12311	4.6411e-37	1.4897e-34		ENSSSCG00000048309	2.78902	2.79499e-08	2.15832e-05
	ENSSSCG00000056738	2.68845	2.06083e-34	4.5822e-32		PNKP	1.70305	5.3152e-37	1.67262e-34		STC1	3.14598	3.54633e-08	2.49957e-05
	SPRY2	2.66761	2.35954e-34	5.10457e-32		BCKDHB	1.66266	1.09965e-36	3.3939e-34		ZYX	1.15762	3.57763e-08	2.49957e-05
	SLC38A5	2.77718	8.5213e-34	1.74894e-31		ND6	3.38435	6.16361e-36	1.83185e-33		ENSSSCG00000007719	1.75646	6.71181e-08	4.28035e-05
	SLC38A1	2.39916	1.12487e-33	2.2795e-31		CDX1	2.68029	2.35957e-35	6.5291e-33		ENSSSCG00000047543	2.53448	7.00166e-08	4.28035e-05
	ASNS	3.9908	1.5051e-33	3.01189e-31		SLC29A1	1.91736	3.66261e-35	9.96292e-33		ENSSSCG00000048333	1.57415	6.69484e-08	4.28035e-05
	CCND2	2.49654	3.71487e-33	7.16522e-31		MARS2	2.54378	4.99175e-34	1.25176e-31		DYNC1I1	2.37677	8.21896e-08	4.82354e-05
	MMP8	5.24043	8.77359e-33	1.61444e-30		SRSF2	2.33888	6.59045e-34	1.60258e-31		BHLHE40	1.56776	1.05195e-07	5.71639e-05
	PCSK2	2.85982	1.62696e-32	2.89399e-30		C1QBP	2.69703	1.27025e-33	2.99798e-31		CHST15	1.16119	1.23882e-07	6.4914e-05
	ND6	3.31291	2.22535e-32	3.87236e-30		TUFM	2.29488	3.30321e-33	7.57331e-31		ENSSSCG00000041300	2.34565	1.38265e-07	6.7621e-05
	NFIL3	3.59378	2.36721e-32	4.07491e-30		SRM	3.66006	7.4175e-33	1.65338e-30		SERPINE1	2.8699	1.5515e-07	7.34308e-05
	ENSSSCG00000053150	4.2886	3.48306e-32	5.93194e-30		GALNT12	3.86895	7.8909e-33	1.73481e-30		ENSSSCG00000041494	1.74646	1.62959e-07	7.47167e-05
	EPHA2	3.61599	6.00747e-32	1.01235e-29		DAZAP1	1.81386	1.07503e-32	2.30042e-30		ENSSSCG00000046740	2.01656	1.97264e-07	8.60364e-05
	TGM3	9.42908	8.7887e-32	1.42119e-29		NACC1	2.11845	1.63349e-32	3.44946e-30		PEAR1	1.16659	2.2716e-07	9.25803e-05
	ENSSSCG00000042520	3.04428	1.05088e-31	1.68235e-29		ENSSSCG00000038056	3.43269	2.38995e-32	4.91748e-30		SNED1	1.95015	2.25819e-07	9.25803e-05
	SLC7A11	5.30547	2.49016e-31	3.87039e-29		SDC1	1.86589	5.38625e-32	1.08055e-29		ENSSSCG00000048993	2.04845	2.39797e-07	9.50891e-05
	ENSSSCG00000051733	7.46513	6.96827e-31	1.03292e-28		LBR	1.92176	7.43781e-32	1.4737e-29		COL4A1	1.54232	3.00383e-07	0.000113123
	ZNRF3	2.61052	1.6402e-30	2.34446e-28		MTA2	1.60897	1.05616e-31	2.01789e-29		CSF3R	1.50328	3.59581e-07	0.000125755
	YBX3	1.79835	1.68168e-30	2.38248e-28		IDH2	1.92314	1.85109e-31	3.45444e-29		ENSSSCG00000044542	1.86794	3.59987e-07	0.000125755
	CBS	4.98565	1.77839e-30	2.49739e-28		PLK1	3.145	6.04109e-31	1.07726e-28		ARID5A	1.60902	3.81033e-07	0.000130012
	PKM	1.9863	3.95733e-30	5.41477e-28		ENSSSCG00000061876	2.55226	8.7306e-31	1.53975e-28		NOD2	1.48311	3.90555e-07	0.000130232
	ENSSSCG00000060276	5.18024	4.76955e-30	6.47082e-28		CARM1	1.67526	2.29371e-30	3.87492e-28		RND1	2.09252	4.17617e-07	0.000136162
	SLC19A2	2.54316	5.68159e-30	7.64341e-28		ENSSSCG00000002260	1.77786	3.79725e-30	6.15576e-28		APOLD1	2.6516	4.52778e-07	0.000144416
	SBNO2	2.81869	6.27121e-30	8.36632e-28		TGM2	2.55312	4.07895e-30	6.54631e-28		CEBPB	1.14474	4.80638e-07	0.000148406
	DAZAP1	2.07456	6.70333e-30	8.86889e-28		VASP	1.4119	5.18688e-30	8.1612e-28		ENSSSCG00000043818	2.54001	4.85514e-07	0.000148406
	PAPPA	3.52898	7.58319e-30	9.86986e-28		ZBTB7A	1.89447	7.61718e-30	1.17609e-27		DEPP1	1.92484	4.98196e-07	0.000149174
	APOD	4.24301	1.69681e-29	2.10575e-27		SLC7A1	2.19051	9.08342e-30	1.38838e-27		ENSSSCG00000049471	2.00881	5.3586e-07	0.00015416
	UPP1	3.86889	2.00355e-28	2.42991e-26		QSOX2	1.55924	9.12025e-29	1.30688e-26		PDE4B	2.1789	6.43523e-07	0.000181572
	TNS3	1.93301	2.27879e-28	2.74294e-26		FASN	3.17273	1.24244e-28	1.71896e-26		TIMP1	2.36161	7.62974e-07	0.000211214
	ZBTB7A	2.1691	2.40693e-28	2.87556e-26		ZNRF3	2.45161	1.98953e-28	2.70593e-26		OSBPL5	1.1824	8.51644e-07	0.000227188
	NUP210	2.16159	3.13359e-28	3.68865e-26		PLEKHH1	2.66225	2.27267e-28	3.06505e-26		MMRN2	1.14477	8.4336e-07	0.000227188
	PNKP	1.95469	7.81832e-28	8.87684e-26		HDAC3	2.2948	3.87685e-28	5.0585e-26		ENSSSCG00000054355	1.13372	8.89275e-07	0.00023299
	RHOB	2.7293	1.04931e-27	1.16655e-25		ENSSSCG00000062085	2.49199	3.84744e-28	5.0585e-26		ENSSSCG00000006588	1.82394	1.2186e-06	0.000313671
	SLC6A9	3.71021	4.16035e-27	4.32488e-25		ENSSSCG00000004392	1.42156	5.64088e-28	7.24244e-26		ENSSSCG00000061983	1.79418	1.41272e-06	0.000357368
	IDH2	1.78112	5.69686e-27	5.84622e-25		ETV6	1.65037	6.21597e-28	7.85513e-26		ERC2	1.46918	1.49393e-06	0.000371507
	ENSSSCG00000006588	3.99282	9.78995e-27	9.85706e-25		KRT18	3.25744	6.37148e-28	7.98874e-26		NAV1	1.3785	1.73657e-06	0.000404427
	NFIC	1.81114	1.07138e-26	1.06533e-24		DERPC	1.48554	6.69676e-28	8.2674e-26		G0S2	1.56698	1.71288e-06	0.000404427
	ZYX	2.19328	1.5906e-26	1.57185e-24		ENSSSCG00000059574	4.06253	7.75101e-28	9.35308e-26		MADCAM1	1.84927	1.7242e-06	0.000404427
	CD14	3.46024	7.59058e-26	7.19039e-24		CCL26	4.16926	1.15919e-27	1.38835e-25		CCNL1	1.1533	1.79034e-06	0.000410435
	ZBTB16	3.23291	8.9004e-26	8.38156e-24		MYBBP1A	3.11063	1.60167e-27	1.89008e-25		HK3	1.37197	1.95684e-06	0.000428519
	SORBS3	2.04554	1.66846e-25	1.54395e-23		SLC1A4	2.355	1.90878e-27	2.23606e-25		ENSSSCG00000014822	1.28198	1.93609e-06	0.000428519
	MIDN	2.28157	1.85073e-25	1.68343e-23		PIGT	2.30836	3.56914e-27	4.12094e-25		CD248	2.11653	1.94833e-06	0.000428519
	SOCS3	4.26006	3.21828e-25	2.86231e-23		VARS1	2.60052	4.00682e-27	4.56067e-25		SNAI2	2.03847	2.20324e-06	0.000475382
	MYBBP1A	2.98651	3.66375e-25	3.22269e-23		ENSSSCG00000053072	3.48349	4.33605e-27	4.86638e-25		MSS51	1.29943	2.60584e-06	0.0005541
	FASN	3.39902	4.00104e-25	3.48112e-23		AGO2	1.2853	5.01333e-27	5.58742e-25		EVI2A	1.25135	2.72871e-06	0.000571937
	TRIM8	1.7526	8.11155e-25	6.87078e-23		ADGRE5	1.50153	5.9451e-27	6.5802e-25		OSMR	1.21763	3.25814e-06	0.000654842
	HMGA1	4.0682	9.53954e-25	7.99574e-23		KRT19	2.50567	1.11844e-26	1.21283e-24		CHAC1	3.52664	3.21835e-06	0.000654842
	MARS2	2.57759	9.87613e-25	8.23474e-23		EPHB2	2.39253	1.56361e-26	1.68419e-24		CSF2RB	1.49715	3.78798e-06	0.000709156
	ACKR1	4.42939	1.14734e-24	9.41938e-23		CEBPD	2.93291	2.53162e-26	2.69072e-24		ENSSSCG00000002520	1.43081	3.77896e-06	0.000709156
	ND5	2.39014	1.4193e-24	1.14756e-22		PIAS4	1.7335	6.64458e-26	6.9246e-24		COL4A2	1.37872	3.65407e-06	0.000709156
	ENSSSCG00000032591	2.91322	1.60886e-24	1.29428e-22		DEGS2	3.67528	7.11967e-26	7.37184e-24		ADAM8	2.51357	3.69925e-06	0.000709156
	MED25	2.35555	1.70339e-24	1.36348e-22		PAXIP1	1.97662	9.261e-26	9.40694e-24		SBNO2	1.01174	4.16096e-06	0.000753698
	MAPK7	2.20557	1.72205e-24	1.37156e-22		SMPD4	1.63196	1.15449e-25	1.15802e-23		ENSSSCG00000032591	1.38183	4.40619e-06	0.000769615
	ENSSSCG00000045948	2.45803	1.80325e-24	1.42208e-22		WFDC2	3.72149	1.31539e-25	1.31123e-23		PXDN	1.08694	4.85884e-06	0.000828941
	ENSSSCG00000060456	2.07329	1.79923e-24	1.42208e-22		AMCF-II	2.98206	2.18087e-25	2.14728e-23		CCL21	1.72247	5.08277e-06	0.000857177
	DEGS2	3.48717	1.94168e-24	1.52374e-22		DDX54	1.61084	3.41723e-25	3.32382e-23		CCN4	1.60787	5.30187e-06	0.000874034
	DNAH17	3.14352	2.34436e-24	1.82189e-22		PKM	1.87178	6.19383e-25	5.91695e-23		BCL6B	1.26515	5.81277e-06	0.000937197
	ETV6	2.01796	3.38184e-24	2.54178e-22		TFF2	4.74986	7.3533e-25	6.94195e-23		ACSL4	1.54283	6.49913e-06	0.0010079
	SH3TC1	2.10308	3.96691e-24	2.96758e-22		ENSSSCG00000063154	2.07254	8.2722e-25	7.76378e-23		ENSSSCG00000043574	1.06172	6.45694e-06	0.0010079
	ERGIC1	1.79289	4.59059e-24	3.40235e-22		NOL9	1.75046	1.17608e-24	1.09738e-22		TSHZ3	1.63829	7.07107e-06	0.00108069
	H2AC6	3.0827	5.45661e-24	4.02557e-22		IMP3	1.50514	1.37447e-24	1.27507e-22		KIRREL1	1.14044	7.27911e-06	0.00108688
	PLEC	2.1506	1.15146e-23	8.1565e-22		APOD	3.64583	1.98967e-24	1.81433e-22		ALPK3	4.71514	7.66733e-06	0.00112495
	CEBPD	2.99569	1.17261e-23	8.26973e-22		COQ6	1.36236	2.26708e-24	2.05562e-22		ADAMTS9	1.7744	8.28948e-06	0.00118346
	TRIM16	2.36036	2.13053e-23	1.45139e-21		TTLL12	1.33564	2.45208e-24	2.20431e-22		OMG	1.24043	8.30807e-06	0.00118346
	CHI3L2	5.15507	2.46974e-23	1.66827e-21		PGD	1.80681	3.46233e-24	3.07e-22		GNAT1	1.69417	8.56533e-06	0.00120837
	LPCAT4	2.81903	2.60414e-23	1.74434e-21		CHPF2	1.72748	3.49013e-24	3.07764e-22		ADAMTS4	3.63847	8.66049e-06	0.00121016
	IL1R2	5.001	2.87061e-23	1.90687e-21		ENSSSCG00000045366	3.85681	3.97593e-24	3.46792e-22		PTPRE	1.09319	9.08139e-06	0.00124525
	ND4	2.17423	4.59884e-23	2.94491e-21		ARHGAP1	1.53133	4.91903e-24	4.19923e-22		ENSSSCG00000003654	1.21373	9.64738e-06	0.00128679
	GALNT12	3.6856	7.62455e-23	4.76802e-21		ACLY	2.02438	4.91253e-24	4.19923e-22		DTX1	1.2522	9.91418e-06	0.00131046
	F13A1	4.54455	7.90165e-23	4.903e-21		ENSSSCG00000037372	2.34814	6.23227e-24	5.29216e-22		ABCG1	1.52222	1.03593e-05	0.00135706
	TEAD4	3.46384	7.9935e-23	4.94085e-21		ENSSSCG00000053058	3.24708	6.33316e-24	5.34952e-22		PLEK	2.18203	1.19169e-05	0.00153372
	ENSSSCG00000048333	3.02918	1.01456e-22	6.19928e-21		PIM3	1.76558	8.80558e-24	7.28457e-22		NARF	1.45537	1.25458e-05	0.00157326
	ENSSSCG00000051747	5.62152	1.14696e-22	6.98163e-21		DNER	2.49081	8.93802e-24	7.35622e-22		KCNJ15	1.83564	1.31657e-05	0.00162325
	ENSSSCG00000003047	5.73264	1.26788e-22	7.68846e-21		EXOSC6	1.36137	1.27764e-23	1.03039e-21		ENSSSCG00000055459	1.81848	1.33969e-05	0.00163799
	SLC43A3	2.43368	1.47152e-22	8.85621e-21		AMPD2	1.89365	1.35389e-23	1.08643e-21		SPACA6	2.30592	1.40391e-05	0.00168565
	ACD	2.44298	1.50212e-22	9.0065e-21		SLC19A2	2.4989	1.40717e-23	1.12357e-21		STX11	1.6205	1.42462e-05	0.00168565
	ENSSSCG00000024568	3.38669	2.29145e-22	1.33395e-20		ADRA2A	3.94389	1.43495e-23	1.13446e-21		GFPT2	2.80617	1.49081e-05	0.00174985
	ENSSSCG00000057427	2.36906	2.52434e-22	1.45892e-20		DUOX2	5.29525	1.74843e-23	1.36881e-21		IGFBP4	1.82137	1.56062e-05	0.00181259
	HK2	3.63312	2.7067e-22	1.55869e-20		SOCS1	3.84171	1.89646e-23	1.47749e-21		MAN1C1	1.1194	1.58132e-05	0.00181259
	ENSSSCG00000041300	4.45835	2.85801e-22	1.63993e-20		SULT2A1	5.49767	2.21499e-23	1.70906e-21		ENSSSCG00000050401	1.45115	1.57491e-05	0.00181259
	PCSK1N	2.74021	3.74168e-22	2.12413e-20		NCEH1	1.36182	2.69086e-23	2.04671e-21		RHBDF2	1.1047	1.62595e-05	0.00183507
	ENSSSCG00000050377	3.53251	4.27795e-22	2.41999e-20		PCSK1N	2.88463	3.19311e-23	2.41727e-21		ELANE	2.01151	1.61866e-05	0.00183507
	SOCS1	3.90521	1.07602e-21	5.93997e-20		ATP13A1	1.72035	3.41719e-23	2.57476e-21		RBMS1	1.17699	1.66186e-05	0.00186128
	LBR	1.70534	1.99079e-21	1.07308e-19		ENSSSCG00000059703	4.0031	3.67322e-23	2.75474e-21		SOCS3	1.84795	1.73557e-05	0.00188624
	TMEM200A	3.98888	2.27319e-21	1.21711e-19		EPHA2	3.14147	4.10468e-23	3.04982e-21		ENSSSCG00000045263	1.38707	1.70961e-05	0.00188624
	CAD	2.44595	2.54435e-21	1.35324e-19		GSK3A	2.04663	4.12775e-23	3.05283e-21		ADGRG3	2.11264	1.83515e-05	0.00192409
	NRIP3	3.53437	3.41379e-21	1.79774e-19		PCNX3	1.18416	4.1504e-23	3.05549e-21		NR4A3	2.36819	1.84888e-05	0.00192409
	EP400	1.67402	5.0101e-21	2.58731e-19		ENSSSCG00000052704	3.48892	4.89875e-23	3.55746e-21		IL1RAP	1.51604	1.93725e-05	0.00200165
	PXDN	2.07156	5.402e-21	2.76296e-19		ENSSSCG00000059210	2.92864	6.04188e-23	4.34826e-21		FLT4	1.3636	2.08684e-05	0.0021116
	ENSSSCG00000039658	1.84661	5.95322e-21	3.03519e-19		ICMT	1.16863	6.31818e-23	4.52681e-21		TNFAIP3	1.04712	2.14022e-05	0.00213614
	CDX1	2.63487	8.97665e-21	4.53335e-19		ENSSSCG00000051733	7.46702	6.97087e-23	4.95024e-21		RALGDS	1.32656	2.14007e-05	0.00213614
	SHMT1	2.09947	9.79454e-21	4.93084e-19		AMPD3	2.51882	7.22983e-23	5.11152e-21		DCHS1	1.15959	2.38328e-05	0.00233734
	ENSSSCG00000059571	2.58797	1.00184e-20	5.01201e-19		MYO19	2.29535	7.27202e-23	5.1188e-21		HDAC7	1.07534	2.46189e-05	0.00237637
	ENSSSCG00000035585	2.56957	1.27506e-20	6.30014e-19		PHLDA2	3.30019	7.91043e-23	5.51976e-21		COL18A1	1.02903	2.52188e-05	0.00240267
	PHLDA2	3.53146	1.36398e-20	6.67765e-19		AKT1S1	2.03641	8.07039e-23	5.607e-21		CLDN5	1.6977	2.53985e-05	0.00240418
	ERRFI1	3.73444	1.48374e-20	7.24182e-19		SBF1	1.26777	1.04787e-22	7.18685e-21		ENSSSCG00000041656	1.21867	2.58514e-05	0.00243136
	SCARF2	2.93939	1.73881e-20	8.40984e-19		H6PD	2.20881	1.07716e-22	7.32516e-21		ENSSSCG00000044044	1.30601	3.0395e-05	0.00282251
	ANKRD11	1.69441	2.99551e-20	1.4146e-18		CCND2	2.29785	1.13622e-22	7.69421e-21		SERPINB2	3.70804	3.28462e-05	0.00303094
	ARRDC2	1.49503	3.48958e-20	1.63347e-18		GBGT1	2.39811	1.42141e-22	9.54488e-21		PDGFRB	1.13462	3.33147e-05	0.00305496
	LTBP4	2.44023	3.80962e-20	1.76777e-18		PLA2G3	3.2246	1.49508e-22	9.99769e-21		ENSSSCG00000050791	1.78724	3.46961e-05	0.00314235
	DUOX2	5.46059	4.14942e-20	1.90885e-18		ENSSSCG00000014031	1.64808	1.87994e-22	1.23652e-20		DDIT4	1.19776	3.86915e-05	0.0034405
	VASP	1.57572	4.3546e-20	1.9975e-18		FAM83D	2.27089	1.98426e-22	1.29981e-20		SPRED3	2.8187	3.94731e-05	0.00346796
	CYP26B1	3.1468	4.54262e-20	2.07187e-18		B3GNT3	1.8176	2.35527e-22	1.51199e-20		ENSSSCG00000044924	1.88724	3.9358e-05	0.00346796
	CBLN2	2.17556	4.69187e-20	2.13387e-18		ENSSSCG00000054633	4.08309	2.51921e-22	1.61079e-20		ENSSSCG00000052472	1.35575	4.11993e-05	0.00359807
	ABCG1	4.3376	6.03068e-20	2.68181e-18		CDS2	1.48397	2.63219e-22	1.67635e-20		GADD45B	1.93262	4.21083e-05	0.0036557
	LRIG1	2.71413	6.6036e-20	2.90432e-18		DNM2	1.31861	3.43857e-22	2.18125e-20		ST3GAL4	1.15638	4.3175e-05	0.0036932
	PLAUR	2.49404	6.58563e-20	2.90432e-18		ENSSSCG00000056738	1.98014	3.6036e-22	2.27693e-20		ACKR1	1.52268	4.37988e-05	0.0036932
	REXO1	1.82303	7.67363e-20	3.35648e-18		ARL2BP	1.96349	3.76152e-22	2.3674e-20		ANGPTL3	1.20134	4.72879e-05	0.00392087
	WFDC2	3.33589	8.22757e-20	3.58897e-18		ENSSSCG00000033606	3.49577	4.7881e-22	3.00173e-20		NFIL3	1.26433	4.7906e-05	0.00392669
	ETV4	3.38091	8.36038e-20	3.63699e-18		SHMT2	1.62848	5.45805e-22	3.40842e-20		HLX	1.39467	4.94557e-05	0.00398689
	PROSER1	1.78297	9.21871e-20	3.99952e-18		TMEM79	2.44022	7.10015e-22	4.41668e-20		THBS1	2.00883	5.179e-05	0.00408528
	VILL	2.52997	9.5822e-20	4.14599e-18		DUSP6	1.19529	8.58796e-22	5.30108e-20		TNRC18	1.02152	5.34118e-05	0.00419068
	LPCAT1	2.24243	1.01354e-19	4.36176e-18		ENSSSCG00000049034	1.59712	8.71277e-22	5.35752e-20		TGM3	1.85352	5.5664e-05	0.00429843
	NACC1	2.17987	1.11536e-19	4.77427e-18		LRIG1	2.34706	9.34759e-22	5.70416e-20		ENSSSCG00000053251	1.33392	5.69488e-05	0.00431211
	DNAAF5	2.30928	1.14027e-19	4.86789e-18		HGH1	1.78979	9.53e-22	5.79345e-20		HTRA3	1.24213	5.86773e-05	0.00435674
	TUBB4A	4.23077	1.23684e-19	5.26413e-18		ENSSSCG00000060456	1.79527	1.07833e-21	6.53059e-20		AEBP1	1.35734	5.8545e-05	0.00435674
	ENSSSCG00000041494	3.26764	1.2807e-19	5.42402e-18		AGRN	1.53508	1.48779e-21	8.97654e-20		PLCD3	2.00523	5.89982e-05	0.00435674
	ENSSSCG00000046740	3.46493	1.40321e-19	5.92719e-18		ENSSSCG00000011850	5.70096	1.50887e-21	9.06959e-20		ENSSSCG00000029231	2.52297	5.90916e-05	0.00435674
	LRRC32	3.12871	1.62285e-19	6.78336e-18		EIF4A3	1.39288	2.08996e-21	1.23316e-19		ENSSSCG00000059667	1.37544	5.8299e-05	0.00435674
	LCN2	4.03342	1.8669e-19	7.74281e-18		NT5C	1.98852	2.08647e-21	1.23316e-19		NFKBIA	1.08626	6.0407e-05	0.00438758
	MYBL2	2.57128	1.89723e-19	7.84825e-18		ARL6IP6	1.59434	2.13564e-21	1.25549e-19		ENSSSCG00000013556	1.73232	6.0028e-05	0.00438758
	H6PD	2.13348	1.99669e-19	8.23842e-18		TBC1D17	1.6841	2.22238e-21	1.30172e-19		PTGIR	2.65876	6.01591e-05	0.00438758
	MDN1	1.72704	2.11028e-19	8.68471e-18		MYBL2	2.29032	3.24857e-21	1.87541e-19		BMP6	1.04271	6.08465e-05	0.00439773
	ENSSSCG00000047620	2.67454	2.18669e-19	8.95311e-18		MRPL38	2.13483	3.32276e-21	1.90454e-19		ENSSSCG00000050012	1.90697	6.24521e-05	0.00447164
	BICDL1	3.08162	2.40402e-19	9.76803e-18		CHI3L2	4.40663	4.00281e-21	2.27e-19		HIP1	1.11052	6.55348e-05	0.00464493
	RASL10B	2.70689	2.53687e-19	1.02817e-17		MPST	2.84515	4.03538e-21	2.28042e-19		ALDH1A2	1.82683	6.58496e-05	0.00464493
	HDAC3	2.18518	3.77484e-19	1.49954e-17		RANBP3	1.25207	4.19278e-21	2.36105e-19		ENSSSCG00000047248	1.69321	6.65682e-05	0.0046509
	ENSSSCG00000054355	2.70811	4.84235e-19	1.88616e-17		TGM3	7.59503	6.89147e-21	3.80073e-19		SOX17	1.25249	6.88411e-05	0.00469785
	IL1A	3.46836	6.30703e-19	2.43506e-17		EEF1E1	2.08554	6.95482e-21	3.82253e-19		SLA	1.20846	7.2754e-05	0.00488101
	TENT4A	2.04528	6.94298e-19	2.66547e-17		SBNO2	1.81224	7.1303e-21	3.9056e-19		IL1R1	2.1963	7.28558e-05	0.00488101
	MED24	1.66016	7.0073e-19	2.68373e-17		ENSSSCG00000055777	3.44626	8.12236e-21	4.43387e-19		ENSSSCG00000011355	1.14576	7.27437e-05	0.00488101
	EXOSC5	2.54096	8.04382e-19	3.05875e-17		PYCR1	1.74595	8.36027e-21	4.54827e-19		PTPRZ1	2.09772	7.64431e-05	0.00509806
	KATNB1	1.87239	1.0608e-18	4.01473e-17		GPAM	1.46365	9.08257e-21	4.92453e-19		GPSM3	1.73255	7.8417e-05	0.00518259
	ENSSSCG00000044767	2.34898	1.28284e-18	4.77604e-17		BMP2	2.37175	9.57016e-21	5.17143e-19		ALG13	1.04528	8.17201e-05	0.00535267
	IRS1	2.43433	1.66465e-18	6.14042e-17		ACD	2.60321	9.87052e-21	5.31584e-19		CHI3L1	4.49462	8.66448e-05	0.00560023
	GPAT4	1.63371	1.79258e-18	6.5971e-17		MAST2	1.77573	1.23878e-20	6.53988e-19		DENND2B	1.32575	9.83503e-05	0.00611568
	ENSSSCG00000055777	3.86948	2.12206e-18	7.79175e-17		KATNB1	1.88784	1.42559e-20	7.42832e-19		GAB2	1.05562	9.83711e-05	0.00611568
	TLNRD1	1.58808	2.16281e-18	7.90513e-17		CEBPB	1.62687	1.66009e-20	8.5668e-19		TNFRSF1B	1.24493	9.96618e-05	0.00614386
	CRMP1	3.56908	2.28823e-18	8.32553e-17		SMARCD1	1.09889	1.73175e-20	8.87953e-19		CLEC1A	1.23366	0.000104399	0.0063295
	WNK2	2.05261	2.6096e-18	9.43048e-17		ENSSSCG00000008001	7.75965	1.80102e-20	9.2053e-19		TNFAIP2	1.62736	0.000106604	0.00641546
	ENSSSCG00000059667	3.23748	2.92622e-18	1.04334e-16		NFIL3	2.34033	1.94694e-20	9.88809e-19		ADRB2	1.81216	0.000106691	0.00641546
	ENSSSCG00000061074	3.01678	3.07532e-18	1.08922e-16		TMEM18	1.35885	2.19698e-20	1.10879e-18		RNF122	2.38769	0.000107585	0.0064428
	PCDH19	3.91641	3.08678e-18	1.09087e-16		ESPL1	2.34251	2.27941e-20	1.13964e-18		ENSSSCG00000051436	1.73828	0.000115317	0.00687779
	SLC36A4	1.66296	3.13081e-18	1.10399e-16		TMEM129	1.60131	2.30346e-20	1.14808e-18		NGFR	1.45513	0.0001178	0.00696922
	TCF7L2	1.76677	3.38258e-18	1.19015e-16		ABCA6	2.63496	2.65452e-20	1.31084e-18		ENSSSCG00000038679	1.60177	0.000124263	0.00732205
	ENSSSCG00000058357	2.93779	3.41526e-18	1.19901e-16		SYVN1	1.8754	3.37183e-20	1.62506e-18		ABCA1	1.0857	0.000128289	0.00752902
	DUSP2	4.04839	3.57822e-18	1.25074e-16		KHSRP	1.31961	3.44504e-20	1.65537e-18		SMO	1.24714	0.000128902	0.00753485
	ENSSSCG00000062379	3.49696	3.6955e-18	1.28892e-16		NME1	2.06141	3.7881e-20	1.81478e-18		ENSSSCG00000045040	1.01119	0.000132318	0.00770385
	SULT2A1	5.12867	3.94052e-18	1.36841e-16		ENSSSCG00000053691	2.59958	4.06641e-20	1.94232e-18		PADI4	2.48302	0.000136499	0.00779266
	ENSSSCG00000061983	3.13675	4.96499e-18	1.71673e-16		HCFC1	1.50227	4.19705e-20	1.99285e-18		MN1	1.52885	0.00013797	0.00784608
	ENSSSCG00000014822	2.42383	5.01765e-18	1.7312e-16		SFN	7.01354	4.28668e-20	2.02941e-18		DENND2A	1.07352	0.00014203	0.00803461
	FUS	3.40558	5.19231e-18	1.78377e-16		SERPINB5	4.90356	4.36129e-20	2.05262e-18		AUH	1.42192	0.00014348	0.0080401
	ENSSSCG00000023569	2.51163	5.3239e-18	1.82506e-16		ENSSSCG00000032073	1.50026	4.83409e-20	2.26849e-18		CRISPLD2	1.6847	0.000154521	0.00842801
	ECM1	1.95751	5.44707e-18	1.86329e-16		ENSSSCG00000013281	1.75341	5.636e-20	2.6248e-18		ENSSSCG00000045470	4.04963	0.000165863	0.00888151
	VARS1	2.57351	7.22652e-18	2.45105e-16		THAP11	1.19368	7.21354e-20	3.33631e-18		CNTFR	1.69485	0.000170543	0.00893646
	ENSSSCG00000033382	4.27407	7.47594e-18	2.53028e-16		ENSSSCG00000036988	2.27736	8.03909e-20	3.69683e-18		MARCHF3	2.03356	0.000169867	0.00893646
	ENSSSCG00000063375	2.56429	8.03057e-18	2.70655e-16		ENSSSCG00000002749	4.0087	8.84487e-20	4.0442e-18		ENSSSCG00000056650	1.39903	0.000172191	0.00899072
	MED16	1.77186	8.28405e-18	2.78028e-16		LRRC59	2.79248	9.12752e-20	4.16158e-18		TULP3	1.13051	0.000181362	0.00932487
	ENSSSCG00000034352	2.87101	8.33739e-18	2.79233e-16		HIRA	1.63809	9.32174e-20	4.23809e-18		ENSSSCG00000041181	1.64886	0.000181478	0.00932487
	MYO19	2.44166	9.79697e-18	3.2607e-16		NUP210	1.99174	9.41316e-20	4.26757e-18		CERS4	1.30361	0.00018379	0.0093631
	ISYNA1	1.79042	9.939e-18	3.28747e-16		TRIM35	1.38255	9.60586e-20	4.34266e-18		F13A1	1.63126	0.000195868	0.00975851
	RHBDD2	2.45115	1.11667e-17	3.67079e-16		RNF150	1.88345	9.75427e-20	4.38505e-18		ENSSSCG00000049691	1.73858	0.000202038	0.00988098
	ZNF598	1.85474	1.1691e-17	3.82743e-16		RPS6KA1	1.46713	1.21579e-19	5.42008e-18		ZFYVE28	1.6972	0.000206638	0.0100093
	PCSK9	4.90904	1.16674e-17	3.82743e-16		PRMT6	1.72963	1.53296e-19	6.77752e-18		ADCYAP1R1	2.01605	0.000206708	0.0100093
	DDX54	1.93678	1.24384e-17	4.05553e-16		ITGB4	1.37997	1.62849e-19	7.16328e-18		ENSSSCG00000038418	2.40625	0.000206274	0.0100093
	PGM2	2.11852	1.41778e-17	4.5853e-16		ENSSSCG00000060276	4.74843	1.64924e-19	7.23188e-18		RELB	1.16048	0.000216171	0.0103649
	TGM2	4.34791	1.4341e-17	4.62875e-16		SLC43A3	2.36447	1.80516e-19	7.85123e-18		ENSSSCG00000031242	2.08705	0.000217878	0.0103789
	ENSSSCG00000007705	2.01265	1.83591e-17	5.83157e-16		INSM1	3.29593	2.13948e-19	9.25514e-18		SLC47A2	3.00248	0.000224599	0.0105619
	ENSSSCG00000056338	3.40733	1.9307e-17	6.1084e-16		CSNK1D	1.4054	2.2143e-19	9.55304e-18		ENSSSCG00000049181	1.38417	0.000231106	0.0107644
	ENSSSCG00000051436	3.46749	2.0906e-17	6.56244e-16		RALY	1.38377	2.439e-19	1.04942e-17		RIPOR3	1.21834	0.00024287	0.0111356
	GNA12	1.7539	2.08717e-17	6.56244e-16		ACSS2	2.33828	2.48199e-19	1.06223e-17		CX3CL1	1.84434	0.000244614	0.0111806
	PRICKLE3	2.94881	2.18485e-17	6.84488e-16		EXOSC5	2.36702	2.58549e-19	1.09774e-17		ENSSSCG00000045406	1.44591	0.000246537	0.0111987
	ENSSSCG00000043288	2.54627	2.19283e-17	6.85646e-16		PAPPA	2.61248	2.64496e-19	1.12003e-17		TGFB3	1.15918	0.000256019	0.0115224
	SAMD4B	1.60776	2.23134e-17	6.94971e-16		PLXNB1	1.85072	4.6088e-19	1.91128e-17		ATP8B2	1.14655	0.000265081	0.0118035
	DPYSL2	1.81521	2.31921e-17	7.1954e-16		ENSSSCG00000056814	3.72061	4.72158e-19	1.953e-17		LRRTM2	1.01888	0.000267355	0.0118152
	PLEKHH1	2.71787	2.41018e-17	7.46318e-16		IL20RA	4.46155	5.31587e-19	2.18755e-17		PHACTR1	1.49962	0.000271327	0.0119547
	ENSSSCG00000053593	5.54571	2.48149e-17	7.66915e-16		CD9	1.75543	5.3443e-19	2.19362e-17		DUSP2	1.83779	0.00028838	0.0125613
	ENSSSCG00000041978	3.10902	2.4957e-17	7.69819e-16		GPAT4	1.31954	9.93365e-19	3.9658e-17		CHST11	1.41733	0.000304775	0.012999
	EEF1E1	2.02374	2.54969e-17	7.84962e-16		IFRD2	1.91325	1.13833e-18	4.52206e-17		CDKN1C	1.23113	0.000325731	0.0134623
	ENSSSCG00000043400	4.19	2.85106e-17	8.7438e-16		SEMA3F	1.415	1.24771e-18	4.9443e-17		TGM2	1.80906	0.000330676	0.013515
	STK39	1.7651	2.87289e-17	8.77713e-16		ENSSSCG00000033697	1.56314	1.32257e-18	5.22808e-17		RASSF2	1.11627	0.000344357	0.0139083
	NOL9	1.69746	2.86862e-17	8.77713e-16		ENSSSCG00000026302	1.94167	1.55074e-18	6.11496e-17		ENSSSCG00000034352	1.5398	0.000345054	0.0139083
	ENSSSCG00000057215	3.72718	3.10814e-17	9.38834e-16		SLC6A20	2.00238	1.61738e-18	6.36207e-17		KIF26A	1.11993	0.000343967	0.0139083
	NISCH	1.2999	3.12856e-17	9.43223e-16		SH3TC1	1.59879	1.80082e-18	7.03195e-17		ENSSSCG00000049982	1.49928	0.000356579	0.0141781
	ENSSSCG00000037372	2.14797	3.55117e-17	1.06662e-15		DNAAF5	2.2405	2.18213e-18	8.45917e-17		IL22RA2	2.07397	0.000361532	0.0142054
	ZNF865	2.35329	3.67698e-17	1.10028e-15		SLC17A9	1.59112	2.37604e-18	9.16661e-17		TNFRSF11B	2.13994	0.000362107	0.0142054
	LLGL1	1.95096	4.03463e-17	1.2028e-15		JUP	1.80097	2.74473e-18	1.05383e-16		MYZAP	1.25501	0.000367257	0.0143308
	TEAD3	1.73408	4.06855e-17	1.21066e-15		ACKR1	2.91389	2.86199e-18	1.09623e-16		MMP14	1.06982	0.000369351	0.0143575
	PIM1	2.41865	4.46671e-17	1.32421e-15		EP400	1.1602	3.20284e-18	1.22386e-16		MAP3K8	1.09077	0.000371462	0.0143802
	SERPINB5	4.57532	4.71062e-17	1.39137e-15		NISCH	1.06876	3.3313e-18	1.26993e-16		GJC1	1.1332	0.000373263	0.0144119
	PHLPP1	2.16629	5.07743e-17	1.49146e-15		FFAR4	3.21334	3.85736e-18	1.46352e-16		EMILIN1	1.02588	0.000378444	0.0145512
	CASP2	1.8112	5.88027e-17	1.71471e-15		MIDN	1.55971	4.3581e-18	1.64572e-16		CLEC2B	1.09439	0.000387681	0.0148126
	ZDHHC1	2.66285	6.11168e-17	1.77894e-15		TUBB4A	3.65131	5.0034e-18	1.87616e-16		PTPN1	1.06209	0.000393049	0.0149787
	ENSSSCG00000038056	2.96473	7.24888e-17	2.09708e-15		PRR16	4.02252	5.43611e-18	2.02893e-16		RGS2	1.75958	0.000398248	0.0150595
	KRT18	3.36007	7.35113e-17	2.12044e-15		SLC1A5	1.64627	5.77807e-18	2.14162e-16		SLCO4A1	1.96422	0.000403596	0.0151835
	ENSSSCG00000028802	3.34369	8.46287e-17	2.43673e-15		LPL	3.83328	6.78529e-18	2.49193e-16		ALAS2	2.84911	0.000413358	0.015432
	CSF3R	3.62632	1.02172e-16	2.93131e-15		FZD5	1.53064	6.82857e-18	2.5021e-16		PTX3	2.26444	0.000419955	0.0155999
	CCL26	4.6418	1.10541e-16	3.15445e-15		ITPK1	2.04491	7.94117e-18	2.88997e-16		ANGPT2	1.2336	0.000431827	0.015919
	ENSSSCG00000063417	3.28989	1.12143e-16	3.19448e-15		ENSSSCG00000011162	1.07068	9.27254e-18	3.34746e-16		ENSSSCG00000056338	1.33146	0.000430832	0.015919
	SCN5A	2.61614	1.30881e-16	3.69538e-15		ENSSSCG00000004572	4.41116	1.0944e-17	3.90311e-16		CCL2	3.60694	0.000437818	0.0160217
	ENSSSCG00000044211	3.07488	1.4694e-16	4.12696e-15		ENSSSCG00000053139	2.89532	1.32615e-17	4.68798e-16		ACKR3	1.31465	0.00044188	0.0160477
	WIZ	1.70459	1.61964e-16	4.53301e-15		ASB1	1.38759	1.41548e-17	4.97092e-16		NIBAN1	1.07647	0.000451525	0.0163172
	DDIT4	2.18913	1.78944e-16	4.97347e-15		TNK1	1.7801	1.56246e-17	5.4751e-16		ZEB1	1.12067	0.000454299	0.0163771
	TADA2B	1.57979	1.83501e-16	5.09129e-15		PCSK9	4.79263	1.68997e-17	5.90899e-16		SLC38A4	1.4773	0.000456487	0.0164156
	ARG2	3.06464	1.91703e-16	5.30048e-15		TENT4A	1.74603	1.8026e-17	6.24838e-16		ENSSSCG00000041978	1.23795	0.000471969	0.0168076
	TRPM2	3.68011	2.06474e-16	5.68922e-15		UPP1	3.61605	1.80861e-17	6.25568e-16		TNIP3	1.61321	0.000475535	0.0168356
	ENSSSCG00000049471	3.57016	2.08174e-16	5.72178e-15		ENSSSCG00000033550	3.8033	2.28153e-17	7.84075e-16		ITPKC	1.03215	0.000479788	0.0169218
	IL17RA	2.13199	2.12281e-16	5.81919e-15		ENSSSCG00000021591	2.48778	2.40346e-17	8.24211e-16		PRR16	1.14927	0.000492776	0.0171339
	QSOX2	1.70865	2.4827e-16	6.79412e-15		HIST1H3E	2.4878	2.49069e-17	8.46886e-16		ENSSSCG00000047477	1.13421	0.000493014	0.0171339
	MADCAM1	2.62193	2.66427e-16	7.26614e-15		ENSSSCG00000058562	1.8129	3.00722e-17	1.00969e-15		ENSSSCG00000047106	1.85404	0.000497671	0.0172213
	SLC29A1	2.22854	2.68559e-16	7.31183e-15		ND4L	1.69376	3.15116e-17	1.0536e-15		ENSSSCG00000038594	1.48056	0.000502358	0.0173426
	ANG	3.07854	2.77709e-16	7.52257e-15		C1orf116	2.40795	3.32142e-17	1.10822e-15		ADAMTSL4	1.2106	0.000520439	0.0176817
	PAXIP1	2.27197	2.89666e-16	7.83321e-15		TRRAP	1.16734	3.42742e-17	1.14122e-15		ENSSSCG00000044211	1.25633	0.000518883	0.0176817
	PIEZO1	1.94886	2.97865e-16	8.0278e-15		GMDS	1.82019	3.45124e-17	1.14677e-15		ENSSSCG00000041250	1.60565	0.00053177	0.0179772
	ADGRG3	4.21505	3.15332e-16	8.44173e-15		HK3	2.6284	3.5067e-17	1.16279e-15		PLAT	1.30741	0.000536117	0.0180825
	SNRNP70	1.66472	3.9544e-16	1.05334e-14		ACAT2	2.98486	3.79818e-17	1.25426e-15		ENSSSCG00000047303	1.287	0.000539438	0.0181528
	SBF1	1.77382	3.9819e-16	1.05891e-14		RBM14	1.47706	3.87021e-17	1.27542e-15		MAP3K14	1.33915	0.000543045	0.0181655
	ENSSSCG00000034524	2.0788	4.0807e-16	1.0811e-14		ENSSSCG00000056711	2.98148	3.9883e-17	1.30629e-15		JAKMIP3	2.19082	0.000542613	0.0181655
	IRF2BPL	2.23241	4.36041e-16	1.14882e-14		ERGIC1	1.47121	4.15525e-17	1.3582e-15		COL5A3	1.41546	0.000568004	0.0185194
	MTHFD1L	1.6014	4.36305e-16	1.14882e-14		ZNF335	1.28737	4.1747e-17	1.36179e-15		IGFBP3	1.09054	0.000565993	0.0185194
	SEMA3F	2.14756	4.66492e-16	1.22227e-14		ENSSSCG00000013092	7.41501	4.3646e-17	1.41796e-15		PALM2AKAP2	1.0907	0.000581729	0.0188785
	ENSSSCG00000042942	2.83958	5.21409e-16	1.35507e-14		TRIP13	1.94782	4.66737e-17	1.50718e-15		ITGA7	1.23666	0.00059223	0.0191392
	ENSSSCG00000058149	3.21323	5.53307e-16	1.43332e-14		G6PC3	1.9518	4.90818e-17	1.58176e-15		CSF1	1.48821	0.000605786	0.0194488
	NBEAL2	1.51078	6.33605e-16	1.63077e-14		TACSTD2	6.71791	6.68707e-17	2.12516e-15		OSBPL6	1.23454	0.000622738	0.0197929
	C1QBP	2.43131	6.608e-16	1.6926e-14		FTSJ1	1.60958	6.85705e-17	2.17488e-15		ENSSSCG00000058149	1.55101	0.000625085	0.0197929
	CHPF2	1.92779	7.15598e-16	1.83003e-14		NEURL1B	1.78974	7.18928e-17	2.27576e-15		ENSSSCG00000061074	1.19168	0.000629108	0.0198074
	R3HDM4	1.81349	7.26251e-16	1.85431e-14		PLEC	1.51418	7.38552e-17	2.33327e-15		ARMCX4	1.21426	0.000639974	0.0199681
	PIM2	3.58526	7.57017e-16	1.92979e-14		CRKL	1.11804	7.59531e-17	2.38546e-15		ENSSSCG00000041080	1.23373	0.000637916	0.0199681
	ENSSSCG00000005519	3.35083	7.63487e-16	1.94319e-14		MIPEP	1.14329	7.9211e-17	2.48292e-15		ENSSSCG00000044894	1.1295	0.00064789	0.0200545
	ELK1	1.80833	7.77799e-16	1.97334e-14		LPCAT1	2.13156	8.89455e-17	2.77721e-15		EBF1	1.10035	0.000654493	0.0202162
	PRR14	1.58644	7.85226e-16	1.98903e-14		ENSSSCG00000060961	3.02514	9.02937e-17	2.81383e-15		PLEKHH2	1.06553	0.000655969	0.0202193
	SAP130	1.45142	8.44237e-16	2.12841e-14		ABL1	1.12797	9.51198e-17	2.95848e-15		SH3PXD2B	1.26598	0.000661406	0.0203441
	ENSSSCG00000045406	3.63067	8.54792e-16	2.15163e-14		CLN8	1.85488	1.11242e-16	3.45322e-15		ENSSSCG00000044108	2.97493	0.00066616	0.0204129
	LDLR	2.16352	8.98185e-16	2.23973e-14		ZNF598	1.56212	1.21657e-16	3.76925e-15		ENSSSCG00000058898	2.29343	0.000668421	0.0204129
	AKT2	1.48447	9.34273e-16	2.32248e-14		SUN1	1.30769	1.33633e-16	4.12439e-15		SERPINE2	1.40639	0.000689075	0.0207044
	GALNT15	3.20748	9.35993e-16	2.32315e-14		HTT	1.01907	1.40114e-16	4.31611e-15		PTCH2	1.22617	0.000688699	0.0207044
	RIPOR1	1.97816	1.00541e-15	2.49158e-14		PIM2	2.54676	1.47804e-16	4.54426e-15		ENSSSCG00000034866	1.47695	0.000737195	0.0216323
	ENSSSCG00000041535	2.30179	1.57357e-15	3.82266e-14		PCSK2	2.35087	1.57927e-16	4.84621e-15		SOD2	1.28901	0.000767201	0.0220713
	RTL6	1.32384	1.61661e-15	3.92127e-14		CD14	2.79786	1.59964e-16	4.89936e-15		TAMALIN	1.51129	0.000772881	0.0221249
	FANCA	2.3475	1.67378e-15	4.0538e-14		TNIP3	3.90918	1.63769e-16	5.00634e-15		CBS	1.10116	0.000800455	0.0225878
	MED15	1.40124	1.80295e-15	4.34036e-14		CPSF7	1.51494	1.76815e-16	5.39488e-15		MRTFA	1.0271	0.000802189	0.0225906
	ARHGAP1	1.68425	2.29337e-15	5.48799e-14		DUS3L	1.92019	1.78872e-16	5.44728e-15		IL4I1	1.29408	0.000825403	0.0230813
	STC1	4.82881	2.31411e-15	5.52933e-14		TKT	1.42169	1.89011e-16	5.69127e-15		ENSSSCG00000046437	2.958	0.000830626	0.0230813
	ASTN1	2.63348	2.37144e-15	5.65787e-14		SMC1A	1.03457	1.98109e-16	5.94288e-15		ENSSSCG00000050662	1.50909	0.000829318	0.0230813
	KPNB1	1.31958	2.38357e-15	5.66992e-14		PKP2	1.37817	2.01044e-16	6.0197e-15		ENSSSCG00000056350	1.68728	0.000829733	0.0230813
	ADGRL1	2.15281	2.52634e-15	5.99174e-14		ANKS1A	1.24557	2.03331e-16	6.07682e-15		S100A12	1.83246	0.000845759	0.0232378
	ENSSSCG00000055987	3.62292	2.53708e-15	6.00831e-14		ENSSSCG00000007705	1.68598	2.43208e-16	7.20157e-15		ENSSSCG00000040441	1.44344	0.000845704	0.0232378
	ACSL1	1.68447	2.65789e-15	6.26827e-14		PROSER1	1.38242	2.64325e-16	7.79808e-15		SHISA7	1.9414	0.000877492	0.023886
	TICRR	1.86402	2.6586e-15	6.26827e-14		ENSSSCG00000032609	2.81571	2.73916e-16	8.06619e-15		ENSSSCG00000050902	1.72421	0.000888249	0.024045
	SLC1A4	3.34989	3.00938e-15	7.04345e-14		ENSSSCG00000035585	2.161	2.77938e-16	8.16966e-15		COL5A1	1.0958	0.000895214	0.0240768
	RNF150	2.01926	3.01625e-15	7.04921e-14		CDA	2.94107	2.94278e-16	8.60268e-15		PNKD	1.22823	0.000903252	0.0242276
	NIBAN2	1.77893	3.07271e-15	7.1707e-14		ENSSSCG00000044767	1.70187	3.44745e-16	1.00051e-14		GFAP	1.77112	0.000919732	0.0245351
	PNKD	2.60756	3.17263e-15	7.38236e-14		TWF2	1.0269	3.48877e-16	1.01067e-14		SEMA4C	1.0089	0.000930608	0.0246403
	MAPKAPK2	1.61453	3.22366e-15	7.46852e-14		ZYX	1.04149	3.5629e-16	1.03029e-14		ENSSSCG00000037358	1.78129	0.000933383	0.0246403
	ABL1	1.29185	3.29782e-15	7.61829e-14		QPCTL	1.64794	4.22296e-16	1.21677e-14		CREB5	1.82289	0.000952615	0.0248896
	KRT19	2.32009	3.53802e-15	8.10304e-14		H2BC21	2.61532	4.34817e-16	1.25061e-14		MAFF	1.09952	0.000953376	0.0248896
	PLK1	3.0951	3.82095e-15	8.71362e-14		AIMP2	2.75973	4.90491e-16	1.40069e-14		ENSSSCG00000058191	1.51245	0.000976445	0.025281
	CHPF	1.26857	4.50654e-15	1.019e-13		VPS11	1.30231	5.09976e-16	1.45117e-14		FHL3	1.21301	0.000978758	0.0252823
	ICE1	1.25678	4.67154e-15	1.05185e-13		ENSSSCG00000033382	4.28178	5.31515e-16	1.50181e-14		DIO3	3.532	0.000994998	0.0255668
	ENSSSCG00000056650	2.812	4.75668e-15	1.06952e-13		FKBP11	1.44866	5.38941e-16	1.52012e-14		CNTNAP1	1.85733	0.000999577	0.0256395
	GPX1	2.99761	4.79009e-15	1.07552e-13		ENSSSCG00000012703	1.29912	5.7038e-16	1.60316e-14		ENSSSCG00000033183	1.72897	0.0010136	0.0257739
	ENSSSCG00000021560	2.06864	4.91538e-15	1.09749e-13		B4GALNT3	2.15683	5.97546e-16	1.67658e-14		ENSSSCG00000033880	1.74093	0.00102281	0.025963
	ADGRE5	1.85966	4.95331e-15	1.10442e-13		PELP1	1.78786	6.33167e-16	1.77342e-14		ENSSSCG00000021414	1.31746	0.00102563	0.025972
	MCTP2	1.85314	5.65442e-15	1.24857e-13		SLC25A19	2.01031	6.79778e-16	1.90066e-14		AASS	1.20855	0.00102978	0.0260052
	IL4I1	3.09604	6.36857e-15	1.4024e-13		TRAP1	1.38967	6.84952e-16	1.91179e-14		S100A8	1.86542	0.00105786	0.0263967
	RRP12	2.58127	7.47575e-15	1.63944e-13		RNF145	1.63224	7.63206e-16	2.12651e-14		ZNF395	1.07213	0.00105978	0.0263967
	B4GALNT3	2.49347	8.03018e-15	1.75622e-13		SLC9A8	1.06809	9.14403e-16	2.53021e-14		FGD5	1.24019	0.00106688	0.0263967
	IL1RAP	2.84708	9.57004e-15	2.07597e-13		TIMELESS	1.66369	9.30833e-16	2.57124e-14		PIK3R5	1.44356	0.00106635	0.0263967
	ATP13A1	1.42219	9.75014e-15	2.11218e-13		SRRM2	1.16768	1.05222e-15	2.88176e-14		ENSSSCG00000021656	1.09359	0.00106677	0.0263967
	SIK1	2.39178	1.00319e-14	2.17029e-13		TRIM28	1.13575	1.06429e-15	2.90985e-14		ENSSSCG00000046252	2.00216	0.00106063	0.0263967
	MAB21L1	3.19831	1.14122e-14	2.44575e-13		ENSSSCG00000057314	1.7154	1.14188e-15	3.1061e-14		ENSSSCG00000056163	1.12966	0.00106445	0.0263967
	ENSSSCG00000012703	1.4063	1.19402e-14	2.54528e-13		MLST8	1.54071	1.15977e-15	3.14943e-14		COL13A1	1.34872	0.00108442	0.0267857
	GBGT1	2.30356	1.22354e-14	2.60474e-13		TBL2	1.15548	1.21185e-15	3.27975e-14		GRAMD1A	1.12998	0.0010953	0.0269334
	GADD45G	2.65144	1.24196e-14	2.64044e-13		PRICKLE3	2.44724	1.30812e-15	3.52247e-14		ENSSSCG00000012627	1.83033	0.00109569	0.0269334
	LRP8	2.49401	1.32932e-14	2.82243e-13		RUVBL2	1.35518	1.34099e-15	3.60495e-14		KAZN	1.12825	0.00112645	0.0274539
	ACLY	2.05658	1.33645e-14	2.83379e-13		EIF4EBP1	1.15717	1.4948e-15	4.00501e-14		BIN1	1.43046	0.00113902	0.0277143
	KIF1A	2.31638	1.50876e-14	3.18651e-13		KIAA1522	1.24305	1.51257e-15	4.04588e-14		SH2B2	1.3482	0.00115391	0.0278805
	FLNB	1.65578	1.5729e-14	3.31324e-13		DDX28	2.2104	1.52762e-15	4.07934e-14		SLC1A2	1.22556	0.0011504	0.0278805
	IPO4	1.60806	1.69473e-14	3.5605e-13		INTS1	1.04852	1.66729e-15	4.43754e-14		SCARA3	1.10928	0.00117331	0.0281288
	KLF16	1.52159	1.89728e-14	3.98081e-13		ENSSSCG00000055830	1.79714	1.68332e-15	4.47279e-14		ENSSSCG00000043635	3.25187	0.00118321	0.0282854
	ENSSSCG00000056391	1.81971	1.92757e-14	4.03906e-13		RHOB	2.08891	1.72299e-15	4.57061e-14		ENSSSCG00000024568	1.28732	0.0012	0.0285817
	ARPP21	3.39791	2.00562e-14	4.19711e-13		NCCRP1	3.45347	1.99069e-15	5.27205e-14		PLAUR	1.29974	0.0012673	0.0296744
	CARS1	1.97715	2.34687e-14	4.86042e-13		GPRC5A	4.61605	2.10087e-15	5.55467e-14		ENSSSCG00000021557	1.74419	0.00130116	0.0301144
	EPM2AIP1	1.85142	2.44444e-14	5.05595e-13		NSUN3	1.45481	2.16115e-15	5.70466e-14		GAS7	1.00383	0.00129751	0.0301144
	ENSSSCG00000063154	2.22554	2.55031e-14	5.24781e-13		GPX1	2.82513	2.21839e-15	5.84614e-14		NKD1	1.22448	0.00130129	0.0301144
	ZNF414	2.26261	2.56755e-14	5.27649e-13		SLC9A1	1.58065	2.26365e-15	5.95563e-14		AFAP1	1.24719	0.00134441	0.0304401
	CD9	1.7026	2.6322e-14	5.3955e-13		ENSSSCG00000043519	2.56077	2.59247e-15	6.78736e-14		AHRR	1.44494	0.00136526	0.0306761
	NOD2	2.20577	2.92464e-14	5.97963e-13		SLC7A11	4.06886	2.61331e-15	6.83078e-14		ENSSSCG00000050322	1.61601	0.00136558	0.0306761
	TIAM1	1.60294	3.1206e-14	6.37215e-13		NME2	1.3627	2.79468e-15	7.26933e-14		ENSSSCG00000060702	2.44297	0.00135974	0.0306761
	ENSSSCG00000059574	2.95836	3.18306e-14	6.49142e-13		ZFP36	1.96126	2.8053e-15	7.28515e-14		NEURL3	1.72352	0.00137995	0.0308527
	SLC20A1	1.87307	3.28835e-14	6.68911e-13		NSUN5	1.47866	3.11653e-15	8.04136e-14		SHROOM4	1.3081	0.00138386	0.0308527
	ENSSSCG00000033720	2.72903	3.38196e-14	6.87078e-13		ZNF865	2.0374	3.32185e-15	8.54364e-14		ENSSSCG00000059588	1.0253	0.00138576	0.0308527
	ENSSSCG00000050715	4.24351	3.98661e-14	8.0583e-13		GPX2	3.56057	3.80547e-15	9.72516e-14		ZFP36L1	1.2702	0.00140628	0.0311205
	ENSSSCG00000048195	2.26281	4.00933e-14	8.09399e-13		MED16	1.44534	3.88473e-15	9.91194e-14		ENSSSCG00000051705	1.13667	0.00140461	0.0311205
	ENSSSCG00000002260	1.93948	4.2951e-14	8.63823e-13		PASK	2.64582	3.96317e-15	1.008e-13		ENSSSCG00000057215	1.33838	0.00142747	0.0314946
	ANAPC1	1.45278	4.58115e-14	9.20196e-13		ATP2C2	1.79742	4.02508e-15	1.0189e-13		DYSF	1.09104	0.00144117	0.0315124
	NAF1	2.13752	4.77266e-14	9.57463e-13		CHPF	1.25016	4.26436e-15	1.07608e-13		SPSB1	1.46061	0.00143626	0.0315124
	OSMR	2.00524	5.32122e-14	1.06219e-12		TXNDC11	1.32887	4.30143e-15	1.08373e-13		THBD	1.0914	0.00143973	0.0315124
	SPACA6	3.28898	5.38307e-14	1.07186e-12		LLGL1	1.48556	4.81406e-15	1.2072e-13		ITGA5	1.05972	0.00145828	0.0317249
	KLF15	2.62119	5.52179e-14	1.09812e-12		TUBGCP3	1.30159	4.86299e-15	1.21757e-13		PPP1R9B	1.12781	0.00145954	0.0317249
	ENSSSCG00000004572	4.9226	5.7724e-14	1.14369e-12		PEF1	1.33796	4.88669e-15	1.2216e-13		ADAMTSL2	1.42968	0.00145573	0.0317249
	AGO2	1.93603	5.91689e-14	1.17087e-12		MRTFB	1.40507	5.06357e-15	1.26188e-13		ZSWIM4	1.1984	0.00146746	0.031803
	AMCF-II	3.57309	5.99648e-14	1.18516e-12		PSMA7	1.56259	5.23255e-15	1.30197e-13		OSM	1.95738	0.00148335	0.0320525
	ZBTB21	2.01825	7.23278e-14	1.42248e-12		SPRY2	2.1803	6.14498e-15	1.52193e-13		RASGEF1C	2.40241	0.00149917	0.0322992
	TSPAN14	1.34375	7.42712e-14	1.4589e-12		TNS3	1.63734	6.1959e-15	1.53217e-13		TMPRSS9	1.3809	0.00150528	0.0323835
	SEPTIN9	1.679	7.63201e-14	1.49462e-12		ENSSSCG00000033451	2.69721	6.22561e-15	1.53715e-13		EMILIN2	1.35269	0.0015169	0.0325856
	ENSSSCG00000043622	2.91465	7.6542e-14	1.49617e-12		ENSSSCG00000045157	2.01095	6.57855e-15	1.61931e-13		ENSSSCG00000035293	1.16673	0.00155837	0.0332202
	GPX2	3.99735	7.767e-14	1.51452e-12		PLXDC1	1.83683	6.89867e-15	1.69033e-13		ENSSSCG00000047564	1.29427	0.00155863	0.0332202
	WRAP53	1.43301	8.22869e-14	1.60064e-12		TUBA4A	2.70761	7.08325e-15	1.73082e-13		NETO1	1.69886	0.00156497	0.0332772
	TNS4	2.89289	8.24244e-14	1.60137e-12		ENSSSCG00000031299	1.40547	7.08587e-15	1.73082e-13		ENSSSCG00000049622	1.48846	0.00157649	0.0334432
	PRRC2A	1.56544	8.38866e-14	1.62781e-12		UHRF1	1.94814	7.20069e-15	1.75097e-13		ENSSSCG00000045296	1.40788	0.00158551	0.0335679
	BAZ2A	1.54314	8.69622e-14	1.68341e-12		KLF6	1.75177	7.50654e-15	1.81162e-13		ENSSSCG00000035208	1.01365	0.00162213	0.0337986
	PLXNB1	1.78293	8.89781e-14	1.7162e-12		SH3RF2	1.98033	7.55727e-15	1.82112e-13		ITGB3	1.23034	0.00164533	0.0341277
	CX3CL1	4.5086	8.91437e-14	1.71733e-12		FOXA1	1.52574	7.79876e-15	1.8765e-13		NRIP3	1.07942	0.00168433	0.0346112
	INSM1	2.85694	9.04662e-14	1.74071e-12		ENSSSCG00000017754	2.12025	8.63347e-15	2.05577e-13		GJB3	2.32683	0.00171471	0.0350882
	NFASC	2.61551	9.20798e-14	1.76963e-12		SOCS3	2.41755	1.05747e-14	2.50315e-13		CCN1	1.89451	0.00172652	0.0351439
	LAMC2	1.83986	9.7433e-14	1.86146e-12		GSTO1	2.3793	1.10854e-14	2.61631e-13		TAL1	1.28991	0.00172701	0.0351439
	PER1	3.19336	9.83276e-14	1.87619e-12		ENSSSCG00000059243	2.72253	1.12169e-14	2.63959e-13		PPFIA2	1.58704	0.00175139	0.0355413
	IL6	4.22873	1.05504e-13	2.00835e-12		AGR2	2.29507	1.15455e-14	2.70915e-13		CYTH1	1.19879	0.00177879	0.0358382
	MLLT6	1.26715	1.07019e-13	2.03286e-12		ERCC2	1.50627	1.28605e-14	3.00872e-13		C17orf113	2.67637	0.00178182	0.0358382
	NKAIN1	2.35657	1.07473e-13	2.03854e-12		PKP3	1.40655	1.32593e-14	3.09751e-13		SMAD3	1.11578	0.00179971	0.0361223
	ZDHHC18	1.81882	1.10849e-13	2.09761e-12		NOC4L	2.00809	1.4679e-14	3.4093e-13		RUNX2	1.17421	0.0018146	0.0362229
	PTGS1	1.65625	1.11614e-13	2.10959e-12		ABCB8	1.56686	1.79143e-14	4.12492e-13		ROBO4	1.25601	0.00184015	0.0365032
	PABPC4	1.70791	1.18689e-13	2.22858e-12		NUP188	1.63587	1.89151e-14	4.3367e-13		ENSSSCG00000044623	1.21437	0.00185802	0.0367398
	CDS2	1.59754	1.1853e-13	2.22858e-12		ENSSSCG00000003253	1.18165	1.93125e-14	4.4215e-13		PPP1R18	1.12592	0.00189633	0.0371205
	PACS2	1.89212	1.18744e-13	2.22858e-12		MAPK7	1.5339	2.04276e-14	4.67012e-13		GRIK2	1.39516	0.00195368	0.0381
	ENSSSCG00000044044	2.42728	1.25948e-13	2.3555e-12		MCCC2	1.26607	2.08168e-14	4.75233e-13		ENSSSCG00000043004	1.7421	0.00195538	0.0381
	ENSSSCG00000045157	2.17138	1.29813e-13	2.42272e-12		CXCL2	5.02073	2.1998e-14	5.01485e-13		TUT4	1.22548	0.00196252	0.0381405
	RBPMS2	3.37387	1.33884e-13	2.49226e-12		SEH1L	1.25355	2.30023e-14	5.22896e-13		ENSSSCG00000048073	1.28033	0.00196608	0.0381456
	COL10A1	2.33816	1.39497e-13	2.58474e-12		ENSSSCG00000056391	1.73051	2.37849e-14	5.3764e-13		RASA3	1.24278	0.00197423	0.0381632
	ENSSSCG00000059588	2.94581	1.58146e-13	2.90673e-12		FOXK2	1.32031	2.48042e-14	5.57538e-13		ENSSSCG00000032951	1.27473	0.00200324	0.0385209
	DUOXA2	3.92784	1.61185e-13	2.95242e-12		CLP1	1.75843	2.58699e-14	5.79869e-13		CHST3	1.21906	0.00201682	0.03857
	GARS1	1.57399	1.86176e-13	3.4024e-12		TYMS	1.98103	2.66541e-14	5.96612e-13		CHST7	1.32837	0.00202626	0.0386597
	ENSSSCG00000047283	3.20277	1.88793e-13	3.44236e-12		CXCL8	2.00978	2.86839e-14	6.39372e-13		SEMA7A	1.3428	0.00207122	0.0392623
	ENSSSCG00000056043	2.97235	1.89331e-13	3.44824e-12		OST4	1.59113	2.87664e-14	6.40321e-13		RINL	1.56727	0.00212817	0.0400828
	TMPRSS9	3.76395	1.9912e-13	3.6224e-12		ENSSSCG00000045948	1.86677	2.99141e-14	6.64026e-13		ENSSSCG00000046291	1.17088	0.0021786	0.0405251
	ARHGEF1	1.30167	1.99972e-13	3.63376e-12		RBM15B	1.47416	3.06739e-14	6.79952e-13		PRRX2	1.54846	0.00219845	0.0406756
	ENSSSCG00000040993	4.40052	2.06836e-13	3.75423e-12		XPO4	1.3342	3.54552e-14	7.81621e-13		ANKRD33B	1.30262	0.00221961	0.0409012
	TTLL12	1.71983	2.08196e-13	3.77121e-12		GNA12	1.24905	3.54084e-14	7.81621e-13		ENSSSCG00000044826	1.43054	0.00222459	0.0409012
	OSBPL5	1.65583	2.08242e-13	3.77121e-12		ENSSSCG00000005596	1.58668	3.90463e-14	8.59607e-13		JUNB	1.19275	0.00225544	0.0413132
	IL22	5.5283	2.13436e-13	3.8609e-12		IL1R2	4.21053	4.03099e-14	8.84998e-13		SERPINC1	1.98214	0.00225218	0.0413132
	VAT1L	2.90467	2.3382e-13	4.21534e-12		NOL11	1.17655	4.07694e-14	8.92722e-13		IMPG2	1.10858	0.00227474	0.0414505
	PITRM1	1.56938	2.48387e-13	4.4679e-12		ENSSSCG00000054992	2.15619	4.23826e-14	9.2544e-13		ENSSSCG00000036044	1.81151	0.00227989	0.0414505
	C15orf39	2.37353	2.74004e-13	4.90116e-12		ENSSSCG00000032113	1.54109	4.25163e-14	9.27099e-13		BICRA	1.43528	0.00229903	0.0414798
	FAM117B	2.39142	2.75222e-13	4.91744e-12		SLBP	1.16255	4.26328e-14	9.28378e-13		PARVB	1.93847	0.00230532	0.0415013
	ENSSSCG00000013556	3.72915	2.77317e-13	4.94936e-12		RELA	1.14224	4.36248e-14	9.48692e-13		PLK2	1.04504	0.00232336	0.0416286
	FHIP1A	2.14763	2.86616e-13	5.10393e-12		GINS1	1.97283	4.72419e-14	1.02044e-12		FAM20A	1.06906	0.00232373	0.0416286
	ENSSSCG00000021656	2.39909	2.97196e-13	5.28645e-12		NBEAL2	1.12444	4.82555e-14	1.03814e-12		AFAP1L1	1.17244	0.00233615	0.0418001
	TBXAS1	2.64918	3.08189e-13	5.46985e-12		WDR73	1.55931	5.10507e-14	1.09534e-12		BIRC3	1.121	0.00234211	0.0418557
	VAC14	1.57024	3.13665e-13	5.56088e-12		ENSSSCG00000010517	1.48911	5.24271e-14	1.11889e-12		KIAA1755	1.75898	0.00240247	0.0425712
	QPCTL	1.82706	3.34105e-13	5.88414e-12		RHBDD2	2.10711	5.26086e-14	1.12127e-12		SULF1	1.2937	0.00247079	0.043467
	CIC	2.00492	3.39369e-13	5.97028e-12		PGM2	2.00127	5.59292e-14	1.18888e-12		ENSSSCG00000053348	1.35818	0.00250142	0.0437958
	GNAT1	2.25904	3.43024e-13	6.02795e-12		DAG1	1.21207	5.98348e-14	1.27022e-12		ARPP21	1.16141	0.00254233	0.0443005
	CRB2	3.85267	3.63149e-13	6.36763e-12		SLC20A2	1.91629	6.00179e-14	1.27243e-12		ICAM1	1.16499	0.00254935	0.0443702
	ZNF217	1.68363	3.76731e-13	6.58415e-12		SAP130	1.22089	6.06374e-14	1.28387e-12		RELT	1.53325	0.00258337	0.0445919
	IL4R	1.45223	3.77474e-13	6.58994e-12		CBS	3.88439	6.17397e-14	1.30548e-12		PITPNC1	1.20423	0.00257697	0.0445919
	ENSSSCG00000031242	4.17877	3.81369e-13	6.64345e-12		CASP2	1.70597	6.5303e-14	1.37539e-12		ALPK2	1.61135	0.00259532	0.0446407
	ENSSSCG00000060071	2.5027	3.99145e-13	6.93802e-12		RNF4	1.01272	6.63165e-14	1.39467e-12		PPL	1.08382	0.00261239	0.0448293
	SLC7A2	2.19867	4.04912e-13	7.03063e-12		ENSSSCG00000032999	1.70845	6.63921e-14	1.39467e-12		SYT6	1.91109	0.00262837	0.0448934
	ARNT2	1.85216	4.06041e-13	7.04259e-12		COPS3	1.1865	6.95297e-14	1.45867e-12		ENSSSCG00000039656	1.14943	0.00265645	0.0451588
	ENSSSCG00000022925	3.35793	4.1672e-13	7.21998e-12		SLC25A25	1.49412	7.08149e-14	1.48369e-12		ENSSSCG00000044405	1.15356	0.00266506	0.0451588
	ENSSSCG00000047477	2.01709	4.19299e-13	7.25681e-12		SLC6A6	1.91162	7.29923e-14	1.52565e-12		ARMH4	1.10877	0.00273066	0.0458401
	HDAC7	1.86372	4.5577e-13	7.871e-12		TMEM165	1.32454	7.30077e-14	1.52565e-12		MPP3	1.67497	0.00275087	0.0461265
	SLC48A1	1.84649	4.57707e-13	7.89594e-12		INTS5	1.09881	8.48068e-14	1.76076e-12		ENSSSCG00000014725	4.14137	0.00278365	0.0465167
	ESPL1	2.37577	4.78482e-13	8.23657e-12		TUBB	1.55211	8.5133e-14	1.76525e-12		RSPO3	1.06808	0.00280133	0.0465998
	TMEM129	1.56635	4.89164e-13	8.41142e-12		ENSSSCG00000008147	1.58605	8.57661e-14	1.77608e-12		STAT5A	1.0813	0.0028169	0.0468058
	UNKL	1.65872	4.94249e-13	8.48063e-12		ISYNA1	2.10434	9.06896e-14	1.87562e-12		ENSSSCG00000054045	1.97383	0.00288479	0.0474329
	ENSSSCG00000014242	2.01523	4.9766e-13	8.53002e-12		ENSSSCG00000057847	2.19786	9.22922e-14	1.90385e-12		RXFP4	1.97825	0.00290999	0.0476823
	WASF2	1.13524	4.98519e-13	8.53561e-12		ASH2L	1.39568	9.40622e-14	1.93539e-12		CLSTN3	1.96043	0.00297066	0.048214
	PAQR5	2.44602	5.09255e-13	8.71012e-12		REXO1	1.49897	9.61426e-14	1.97314e-12		EGR2	1.77989	0.00296898	0.048214
	ENSSSCG00000058071	2.6238	5.11147e-13	8.73315e-12		ENSSSCG00000033189	1.65557	9.7645e-14	2.00141e-12		PIK3AP1	1.15537	0.00301435	0.0488151
	NOTCH4	2.18308	5.1525e-13	8.79386e-12		ENSSSCG00000057427	2.07147	9.90856e-14	2.02576e-12		FAM110D	1.22205	0.00301958	0.048846
	ENSSSCG00000043519	3.26295	5.39779e-13	9.1929e-12		ZDHHC1	2.59973	1.06625e-13	2.1716e-12		NES	1.53039	0.00302917	0.0489472
	ADRA2A	3.443	5.63357e-13	9.58426e-12		ENSSSCG00000023569	2.14015	1.08759e-13	2.20946e-12		RAB36	1.35879	0.00305047	0.0492371
	ENSSSCG00000044542	2.73411	5.94872e-13	1.00776e-11		KCTD13	1.80518	1.20124e-13	2.42806e-12		ENSSSCG00000007978	2.75876	0.00305459	0.0492493
	STX11	2.90042	6.21563e-13	1.05075e-11		SORBS3	1.74449	1.33403e-13	2.68293e-12		GPR4	1.58862	0.0030681	0.0493587
	CELSR3	2.65332	6.33366e-13	1.06957e-11		UBE3C	1.08349	1.33622e-13	2.68397e-12		CYP2D6	1.13807	0.00311217	0.0497947
	RPTOR	1.27593	6.37513e-13	1.07431e-11		RFK	1.65493	1.41356e-13	2.8287e-12	down-regulation PCGs	DNAJC22	-1.07315	6.24786e-05	0.00447164
	TUBB	1.56632	6.7667e-13	1.1379e-11		UNC5D	2.83883	1.42464e-13	2.84732e-12		CD1B	-2.87339	5.64768e-13	8.28628e-09
	RFX2	2.93687	7.13286e-13	1.19696e-11		ZDHHC16	1.36606	1.44713e-13	2.88869e-12		SLC18B1	-1.79096	8.78182e-09	8.58979e-06
	ZSWIM4	2.63725	7.34285e-13	1.22962e-11		SEPTIN9	1.50362	1.59089e-13	3.14824e-12		GSDMB	-1.16241	8.32086e-09	8.58979e-06
	ENSSSCG00000006050	2.96731	7.67891e-13	1.28187e-11		FANCA	2.41553	1.63419e-13	3.22993e-12		ENSSSCG00000054388	-3.90977	9.30572e-08	5.25129e-05
	PIAS4	1.53495	8.04525e-13	1.33468e-11		LDLR	1.6788	1.75031e-13	3.45096e-12		GDA	-1.51904	1.29366e-07	6.54504e-05
	GDF15	5.0875	8.63181e-13	1.42902e-11		SLC22A3	1.48908	1.79083e-13	3.5265e-12		GPR34	-1.1887	1.99376e-07	8.60364e-05
	TNRC6B	1.12105	8.67735e-13	1.43508e-11		ARHGAP19	1.2545	1.8136e-13	3.56696e-12		FLVCR1	-1.24968	3.00695e-07	0.000113123
	WHAMM	1.58348	8.77034e-13	1.44896e-11		ENSSSCG00000029414	3.04349	1.88371e-13	3.69581e-12		NLRP6	-2.29812	3.08446e-07	0.000113138
	MED27	1.72366	8.84655e-13	1.45946e-11		MED24	1.35686	2.01771e-13	3.94905e-12		TFF2	-2.45545	5.26615e-07	0.00015416
	ENSSSCG00000033606	3.04926	8.8521e-13	1.45946e-11		SF3B4	1.32278	2.09589e-13	4.09706e-12		ZNF26	-1.08435	1.72579e-06	0.000404427
	ENSSSCG00000002520	2.7244	9.19845e-13	1.51189e-11		ASNS	3.03954	2.17002e-13	4.23168e-12		SLC46A3	-2.1475	3.30332e-06	0.00065495
	KLHL26	1.79718	9.58897e-13	1.57446e-11		H2BC11	2.5236	2.2806e-13	4.43253e-12		MPEG1	-1.2011	3.81838e-06	0.000709156
	CARM1	1.68672	9.7355e-13	1.59226e-11		FHIP1A	1.96114	2.2999e-13	4.46326e-12		TP53I3	-2.25436	4.21939e-06	0.000754963
	XPO6	1.51355	1.01112e-12	1.64838e-11		AKAP1	1.39144	2.4597e-13	4.76185e-12		GMPR2	-1.03599	4.39434e-06	0.000769615
	ARHGAP44	3.41349	1.06294e-12	1.72933e-11		TMEM254	2.07939	2.48814e-13	4.81111e-12		ZNF287	-1.18145	4.72899e-06	0.000816279
	ENSSSCG00000038606	8.18417	1.09923e-12	1.78113e-11		IL1A	2.25683	2.6206e-13	5.04897e-12		SCO2	-1.50204	5.15484e-06	0.000859452
	ENSSSCG00000061605	3.87702	1.10624e-12	1.78886e-11		C15orf39	2.14507	2.90455e-13	5.5693e-12		ZNF322	-1.2009	5.80612e-06	0.000937197
	TAF15	1.07985	1.24873e-12	1.99311e-11		CD24	1.29424	2.9104e-13	5.57386e-12		GBA3	-1.96588	7.27174e-06	0.00108688
	CHAC1	5.28397	1.25741e-12	2.00496e-11		PTDSS1	1.0619	3.01478e-13	5.76688e-12		AQP8	-5.41652	8.26629e-06	0.00118346
	HDAC4	1.88234	1.27653e-12	2.03343e-11		KLF5	1.03905	3.03228e-13	5.79346e-12		PEX11A	-1.54384	9.40961e-06	0.00127831
	ENSSSCG00000056814	2.98387	1.29552e-12	2.06163e-11		ENSSSCG00000033894	1.97058	3.12733e-13	5.96796e-12		DUSP19	-1.03714	9.56395e-06	0.00128679
	PGS1	1.52042	1.32886e-12	2.11258e-11		URB1	2.05485	3.26522e-13	6.20896e-12		SDF2L1	-1.48203	1.11854e-05	0.00145232
	NRF1	1.22797	1.35127e-12	2.14396e-11		FMO1	2.49449	3.35887e-13	6.3644e-12		ENSSSCG00000056535	-6.03439	1.22062e-05	0.0015573
	HCFC1	1.84464	1.36134e-12	2.1578e-11		COG8	1.07	3.44887e-13	6.51955e-12		GPD1L	-1.47683	1.41674e-05	0.00168565
	VPS37B	1.8229	1.38891e-12	2.19931e-11		STK39	1.30283	3.47359e-13	6.55855e-12		TCTA	-1.09975	1.39815e-05	0.00168565
	ENSSSCG00000055971	3.12497	1.39552e-12	2.20541e-11		MOGS	1.26315	3.96635e-13	7.45386e-12		G6PC1	-4.73893	1.73488e-05	0.00188624
	ADAMTS15	2.4605	1.46969e-12	2.31972e-11		BAZ2A	1.01022	4.14833e-13	7.78641e-12		SLC7A9	-1.83607	1.83407e-05	0.00192409
	HNRNPH3	1.74402	1.53724e-12	2.41508e-11		ZNF217	1.18076	4.21649e-13	7.88699e-12		ANPEP	-2.00066	1.99792e-05	0.00203566
	AKT1S1	1.92977	1.69355e-12	2.65285e-11		AKT2	1.25142	4.37123e-13	8.15743e-12		ENSSSCG00000030901	-1.71225	1.98927e-05	0.00203566
	KRT80	3.67214	1.79395e-12	2.79915e-11		ENSSSCG00000059571	1.87427	4.40633e-13	8.21338e-12		AP5S1	-1.14563	2.19152e-05	0.00217256
	NUPR1	2.64781	1.82997e-12	2.84703e-11		NFATC2IP	1.62763	4.6428e-13	8.63411e-12		CCL25	-1.44267	2.45491e-05	0.00237637
	ACOT7	2.13047	1.86336e-12	2.89387e-11		ENSSSCG00000047083	2.3288	4.73652e-13	8.7982e-12		SLC6A19	-1.82628	3.43353e-05	0.00312899
	ENSSSCG00000054633	3.35559	1.86369e-12	2.89387e-11		PDP2	1.55154	4.86925e-13	9.02386e-12		TFF3	-1.30523	3.54836e-05	0.00319396
	ENSSSCG00000029414	2.99792	1.87455e-12	2.90424e-11		CAD	2.17681	4.9301e-13	9.1261e-12		CCL28	-1.92195	3.59479e-05	0.00321602
	PRSS22	3.36577	1.92231e-12	2.96762e-11		C2	2.03471	5.27473e-13	9.73036e-12		AOC1	-1.76555	4.75005e-05	0.00392087
	DCHS1	1.93162	1.92892e-12	2.9721e-11		TEAD3	1.09901	5.99286e-13	1.09669e-11		TCFL5	-1.05898	5.04232e-05	0.00404268
	TMEM201	2.11288	1.94339e-12	2.99151e-11		GAR1	1.28706	6.7618e-13	1.23318e-11		SLC28A2	-1.98304	5.07967e-05	0.00405048
	FLII	1.25151	2.07664e-12	3.18744e-11		ZBTB16	2.26202	6.83152e-13	1.24448e-11		NEUROG3	-2.5726	5.1125e-05	0.00405463
	ATG7	1.08979	2.22869e-12	3.41101e-11		MED25	1.71325	6.95931e-13	1.26633e-11		SLC35A5	-1.02304	5.51923e-05	0.00429843
	TNS2	2.17237	2.31457e-12	3.53569e-11		KLHL22	1.56894	7.04135e-13	1.27835e-11		DNAJB9	-1.16304	5.5475e-05	0.00429843
	MRTFB	1.75592	2.36102e-12	3.6032e-11		TRIM71	2.15685	7.27342e-13	1.31454e-11		SLC25A15	-1.03908	5.62054e-05	0.00431211
	SLC12A4	1.35593	2.49115e-12	3.79455e-11		MRPL55	1.29252	7.34796e-13	1.32652e-11		ENSSSCG00000056610	-1.57456	5.70167e-05	0.00431211
	ENSSSCG00000043019	4.58299	2.60416e-12	3.95541e-11		AVPI1	1.00007	8.81265e-13	1.57499e-11		AIG1	-1.11998	6.41987e-05	0.00457244
	TUFM	1.86163	2.62766e-12	3.98732e-11		CIRBP	1.36732	9.38732e-13	1.67397e-11		CBX8	-1.28767	6.76452e-05	0.00465958
	MIPEP	1.08266	2.86026e-12	4.33207e-11		ALG12	1.28726	1.26729e-12	2.23012e-11		ENSSSCG00000060485	-6.1444	6.85758e-05	0.00469785
	USP44	2.15044	2.93775e-12	4.43684e-11		COL10A1	1.68931	1.31965e-12	2.31971e-11		ABCA9	-1.10848	7.69046e-05	0.00510563
	SLCO2A1	1.49519	2.98072e-12	4.49749e-11		COPE	1.6742	1.39172e-12	2.43839e-11		ENSSSCG00000026387	-1.65537	8.14631e-05	0.00535267
	BRPF1	1.17148	3.00596e-12	4.52704e-11		REEP4	1.45018	1.4548e-12	2.54614e-11		FAM13B	-1.12668	8.74814e-05	0.0056295
	ENSSSCG00000047003	1.49892	3.13731e-12	4.71599e-11		TBXAS1	2.10106	1.45975e-12	2.55202e-11		FBP2	-2.13158	8.91467e-05	0.00568678
	H1-10	1.7556	3.15686e-12	4.74092e-11		BZW2	1.1365	1.52243e-12	2.65293e-11		ENSSSCG00000037745	-1.91341	0.000134269	0.00775588
	CHIC2	1.21976	3.33801e-12	4.99877e-11		SLC35B4	1.74821	1.63997e-12	2.84848e-11		MOGAT1	-2.03724	0.000149472	0.00830703
	ENSSSCG00000052472	2.92705	3.57043e-12	5.32207e-11		DDX39B	1.31488	1.64815e-12	2.85958e-11		NR0B2	-1.57852	0.000152046	0.00835514
	CAMSAP2	1.25189	3.61157e-12	5.37838e-11		KIFC1	2.09132	1.71078e-12	2.96505e-11		ZSCAN16	-1.25542	0.000151846	0.00835514
	GSK3A	1.74015	3.63546e-12	5.40892e-11		NRF1	1.0343	1.72964e-12	2.99127e-11		MTTP	-1.82958	0.000153376	0.00839677
	RNF149	1.77247	3.66766e-12	5.45177e-11		ENSSSCG00000003612	1.49676	1.89347e-12	3.24661e-11		C4orf46	-1.10069	0.000162705	0.00874437
	ENSSSCG00000013281	1.69416	3.71845e-12	5.52214e-11		R3HDM4	1.57837	2.18105e-12	3.71589e-11		ENSSSCG00000033766	-1.25849	0.000169819	0.00893646
	ENSSSCG00000059526	3.15482	3.7452e-12	5.55671e-11		FOS	2.19938	2.18673e-12	3.72161e-11		TMEM35B	-1.81852	0.000178637	0.0092942
	PIK3CD	2.47312	3.76922e-12	5.58718e-11		WNK2	1.68198	2.27267e-12	3.85969e-11		LYPD8	-1.95311	0.000179996	0.00932487
	RNF145	1.56609	3.84736e-12	5.69772e-11		TRIM8	1.03551	2.34501e-12	3.96575e-11		L3HYPDH	-1.5331	0.000185951	0.00940786
	HMGXB3	1.29662	3.89088e-12	5.75153e-11		ETHE1	1.71674	2.37964e-12	4.02008e-11		SEC14L2	-2.16315	0.000197363	0.00975851
	ENSSSCG00000045040	2.36432	3.96281e-12	5.84706e-11		FIGNL1	2.05985	2.41008e-12	4.05869e-11		GLYCTK	-1.33123	0.000197538	0.00975851
	LAMB2	1.81398	3.97227e-12	5.85563e-11		ZNF628	1.52492	2.47185e-12	4.15836e-11		TLCD4	-1.20441	0.000196744	0.00975851
	HAPLN3	2.34156	4.05143e-12	5.96682e-11		PNPLA2	1.99247	2.51875e-12	4.2284e-11		NUDT12	-1.17888	0.000200784	0.00985252
	SUN2	1.72747	4.24073e-12	6.22842e-11		SCD	2.59179	2.54066e-12	4.26071e-11		TM6SF2	-1.63006	0.000223228	0.0105312
	LENG8	2.12036	4.26483e-12	6.25808e-11		FGFR4	1.5846	2.68731e-12	4.49257e-11		ZNF84	-1.06216	0.000229336	0.0107324
	SUN1	1.37816	4.34975e-12	6.36518e-11		LONP1	1.26891	2.69493e-12	4.50062e-11		NR1I3	-2.64335	0.000236533	0.0109133
	NCCRP1	3.32262	4.41583e-12	6.45009e-11		DAGLB	1.28316	2.84241e-12	4.72723e-11		RAB27B	-1.08981	0.000238224	0.0109568
	SP6	5.29745	4.48787e-12	6.54338e-11		ECM1	1.40628	3.02822e-12	5.03105e-11		ENSSSCG00000037351	-1.92089	0.000246164	0.0111987
	ENSSSCG00000053251	2.14138	4.51842e-12	6.57595e-11		KRTCAP3	1.21904	3.06459e-12	5.08621e-11		MFSD4B	-1.50379	0.000255684	0.0115224
	ENSSSCG00000057661	2.68822	4.5636e-12	6.62964e-11		TICRR	1.47862	3.16e-12	5.23373e-11		ENSSSCG00000037413	-1.06695	0.000260032	0.0116672
	MTA2	1.55578	4.67183e-12	6.76649e-11		ENSSSCG00000056247	3.01491	3.28907e-12	5.43069e-11		ENSSSCG00000038067	-1.78626	0.000265482	0.0118035
	TRIM71	2.06255	5.10489e-12	7.36917e-11		VIPR1	1.21546	3.3386e-12	5.5068e-11		ACE2	-1.38886	0.00028852	0.0125613
	YOD1	1.35987	5.15432e-12	7.43383e-11		ENSSSCG00000058828	1.6986	3.63365e-12	5.97504e-11		EFEMP1	-1.02826	0.000297231	0.0128642
	ZNF592	1.15834	5.32099e-12	7.64665e-11		TMCO3	1.03467	3.69889e-12	6.0761e-11		ENSSSCG00000037808	-1.34715	0.00029872	0.0128907
	NCAPG2	1.72148	5.3708e-12	7.70441e-11		AREG	3.79806	4.11806e-12	6.73022e-11		ENSSSCG00000038269	-1.28547	0.000300776	0.0129413
	LRRTM2	1.9955	5.97601e-12	8.53433e-11		ENSSSCG00000038606	7.73559	4.23023e-12	6.9065e-11		ENSSSCG00000053058	-1.4301	0.00031297	0.0132331
	BCL9L	1.37574	6.69429e-12	9.51767e-11		TESK1	1.40139	4.26279e-12	6.9526e-11		DKK2	-1.77762	0.000315017	0.0132433
	YTHDF1	1.5453	6.96839e-12	9.8898e-11		GPRL15	5.11734	4.51359e-12	7.29744e-11		FBXO15	-1.53658	0.000320309	0.0134274
	HTT	1.59484	7.01987e-12	9.95404e-11		HMGXB3	1.26302	4.60186e-12	7.41519e-11		XKR9	-1.2154	0.00032366	0.0134523
	ENSSSCG00000053790	2.97035	7.17956e-12	1.01715e-10		CDKN1A	2.0613	4.62007e-12	7.43705e-11		PSENEN	-1.02281	0.000324572	0.0134523
	NAV1	1.82761	7.27242e-12	1.02939e-10		ELK1	1.38578	4.70166e-12	7.54569e-11		AMT	-1.52244	0.00033069	0.013515
	FAM20A	2.52467	7.33551e-12	1.0374e-10		H1-10	1.54906	4.74112e-12	7.60142e-11		ASPA	-1.35638	0.000334316	0.0136253
	FMO1	2.64279	7.35795e-12	1.03966e-10		GARNL3	1.60071	4.91005e-12	7.86441e-11		DHDH	-1.45007	0.000343164	0.0139083
	ADM	2.10035	7.89957e-12	1.11324e-10		TBL3	1.18899	5.29315e-12	8.45271e-11		MGST3	-1.25964	0.00034888	0.0139955
	RARA	1.43738	8.10232e-12	1.13981e-10		LPCAT4	2.35628	5.67887e-12	8.99706e-11		SLC35G1	-1.3137	0.000349125	0.0139955
	DAGLB	1.96638	8.26848e-12	1.16216e-10		URB2	1.39169	5.92551e-12	9.37855e-11		CILP	-1.25049	0.000359925	0.0141958
	GPRL15	5.13524	8.86072e-12	1.24213e-10		F13A1	2.92464	5.93257e-12	9.38048e-11		SHLD1	-1.6517	0.000365267	0.0142912
	RAD54L2	1.212	8.90248e-12	1.24657e-10		HPDL	2.39607	6.51032e-12	1.02335e-10		ENSSSCG00000005962	-1.54961	0.000382627	0.0146577
	OBSCN	1.78858	8.90794e-12	1.24657e-10		SLC36A4	1.18904	6.7356e-12	1.05669e-10		CHPT1	-1.06655	0.000394083	0.0149792
	PNPLA2	1.42016	9.04093e-12	1.26407e-10		ADGRL1	1.57182	6.85396e-12	1.07421e-10		ENPEP	-1.32717	0.000397268	0.0150595
	MMP3	1.99542	9.10106e-12	1.26915e-10		SHISA5	1.31192	6.94376e-12	1.08722e-10		ENSSSCG00000008555	-2.41969	0.000421045	0.0155999
	SH2D3C	2.20324	9.74945e-12	1.35603e-10		CERS5	1.20379	7.00419e-12	1.09455e-10		PRADC1	-1.04319	0.000440831	0.0160477
	ENSSSCG00000004392	1.42959	1.02177e-11	1.41746e-10		ENSSSCG00000038182	2.66591	8.51287e-12	1.31876e-10		NME6	-1.27276	0.000464706	0.0166297
	CEP43	1.78687	1.02311e-11	1.41809e-10		ANAPC1	1.40951	9.08014e-12	1.40392e-10		ABCA6	-1.00049	0.00054428	0.0181655
	VWCE	5.17338	1.06357e-11	1.46908e-10		HSD11B2	2.04029	9.75487e-12	1.50246e-10		SMLR1	-1.69974	0.000551521	0.0183075
	ENSSSCG00000049181	2.56225	1.11872e-11	1.53995e-10		NRG1	2.47488	9.89379e-12	1.51948e-10		SULT1B1	-1.56857	0.000566176	0.0185194
	MNT	1.28841	1.14205e-11	1.56937e-10		SLC25A33	1.55358	9.95114e-12	1.52682e-10		ENSSSCG00000035706	-1.72429	0.000596591	0.0192378
	SCARA3	1.96829	1.22714e-11	1.67909e-10		NAF1	1.69951	1.00197e-11	1.53588e-10		TUBAL3	-1.31166	0.000601513	0.0193539
	RETN	3.53326	1.27248e-11	1.73815e-10		ATP2A3	1.11517	1.02795e-11	1.5712e-10		ALG14	-1.12025	0.000610753	0.0195228
	CDKN1A	2.1488	1.31314e-11	1.79216e-10		ENSSSCG00000050754	3.26129	1.06831e-11	1.63133e-10		CCDC107	-1.22969	0.000627295	0.0197929
	WNK1	1.04102	1.31601e-11	1.79455e-10		PRDX4	1.02191	1.07072e-11	1.63346e-10		ACOT8	-1.02613	0.000626376	0.0197929
	ITPKC	2.02267	1.36917e-11	1.86386e-10		PRR14	1.36637	1.07771e-11	1.63944e-10		ENSSSCG00000033414	-1.16858	0.000623221	0.0197929
	ENSSSCG00000048875	3.87301	1.39552e-11	1.89812e-10		FLNB	1.22131	1.08142e-11	1.64353e-10		ACAA2	-1.30239	0.000638962	0.0199681
	SOX17	2.34773	1.41929e-11	1.92882e-10		MAP2K3	1.11134	1.1466e-11	1.73613e-10		ANKRD40CL	-1.37822	0.000667994	0.0204129
	IL20RA	3.65739	1.49611e-11	2.02633e-10		CXCR4	1.8249	1.14667e-11	1.73613e-10		EHHADH	-1.44156	0.000677584	0.020498
	BCKDHB	1.23893	1.51742e-11	2.05207e-10		ENSSSCG00000056851	2.29701	1.17484e-11	1.77542e-10		THNSL1	-1.02691	0.000701054	0.0208704
	MCCC2	1.09885	1.53132e-11	2.06644e-10		SPDEF	2.38608	1.23921e-11	1.87094e-10		AQP11	-1.37311	0.000739733	0.0216634
	ENSSSCG00000057314	2.01147	1.56437e-11	2.10631e-10		RBPMS2	3.26425	1.24466e-11	1.87741e-10		HYAL1	-1.02376	0.000756366	0.021975
	NRG1	2.61402	1.62528e-11	2.18098e-10		ENSSSCG00000041535	1.55731	1.2753e-11	1.92e-10		CPLANE2	-2.58556	0.000792478	0.0224898
	HEATR6	1.2263	1.6957e-11	2.26977e-10		SAMD4B	1.2227	1.30777e-11	1.96336e-10		C1orf53	-1.55358	0.000842039	0.0232225
	CSK	1.11869	1.70765e-11	2.28194e-10		RNF149	1.11292	1.36368e-11	2.03968e-10		SLC2A2	-1.04273	0.000858808	0.0234645
	ENSSSCG00000050482	3.29009	1.80437e-11	2.39919e-10		ENSSSCG00000038187	1.62379	1.3689e-11	2.04558e-10		FAXDC2	-1.38737	0.000861954	0.0235067
	ENSSSCG00000035208	2.62997	1.83821e-11	2.43811e-10		PCDH19	2.6533	1.37316e-11	2.05003e-10		SHPK	-1.92321	0.000895987	0.0240768
	PARD3	1.32152	1.87178e-11	2.47852e-10		EMD	1.35329	1.41755e-11	2.11237e-10		GOLT1A	-1.67625	0.000936247	0.0246403
	ENSSSCG00000043652	2.09929	1.88323e-11	2.49162e-10		LTBP4	1.73086	1.42603e-11	2.12304e-10		ENSSSCG00000052111	-2.34747	0.000934916	0.0246403
	ENSSSCG00000004830	2.44564	1.89478e-11	2.50483e-10		DPM2	1.61009	1.45431e-11	2.15913e-10		TRAPPC5	-1.12065	0.00100581	0.0257543
	DRD1	2.94864	1.96869e-11	2.59611e-10		TASOR2	1.05195	1.46624e-11	2.17298e-10		ZKSCAN7	-1.85835	0.00103904	0.026104
	ENSSSCG00000047783	3.35421	2.09801e-11	2.75982e-10		CCNJL	2.42126	1.46969e-11	2.17392e-10		IGSF10	-2.29787	0.00115157	0.0278805
	DHX30	1.30423	2.11332e-11	2.77768e-10		SP5	1.70537	1.52435e-11	2.24855e-10		ENSSSCG00000010734	-1.25998	0.00118379	0.0282854
	SUV39H1	1.85476	2.12036e-11	2.78465e-10		BTN1A1	7.04431	1.54514e-11	2.27296e-10		ZSCAN31	-1.32996	0.00118563	0.0282854
	SNED1	2.63092	2.18234e-11	2.85433e-10		XRCC2	2.21996	1.57803e-11	2.31709e-10		HYI	-1.02862	0.00126993	0.0296744
	TIMELESS	1.64427	2.21085e-11	2.88691e-10		ANKRD52	1.30989	1.85257e-11	2.70536e-10		PCSK4	-3.1039	0.00129104	0.0300193
	GABRB3	2.69682	2.22469e-11	2.90261e-10		ATP5MC3	1.09662	1.85142e-11	2.70536e-10		WDCP	-1.06453	0.00130662	0.030171
	CCNL1	1.61698	2.28079e-11	2.97096e-10		RRP12	2.20917	1.89247e-11	2.75611e-10		SENP8	-1.08044	0.00131366	0.030171
	MAP2K3	1.35611	2.30422e-11	2.99661e-10		ENSSSCG00000029289	5.96058	1.90496e-11	2.76676e-10		CLCA1	-1.26336	0.00132822	0.0303098
	ANKS1A	1.35144	2.3073e-11	2.99817e-10		CLUH	1.35174	1.9276e-11	2.79458e-10		MTRFR	-1.5623	0.00133015	0.0303098
	TIMP1	3.31688	2.45738e-11	3.18029e-10		PGAP6	1.30198	1.98681e-11	2.87265e-10		MCOLN1	-1.25795	0.00133039	0.0303098
	NUP214	1.42563	2.50728e-11	3.24225e-10		NELFA	1.37171	2.03712e-11	2.93549e-10		KRCC1	-1.25276	0.00133452	0.0303567
	MTA1	1.3375	2.68521e-11	3.46115e-10		FOXK1	1.35756	2.11279e-11	3.03293e-10		C21orf62	-1.98724	0.00136738	0.0306761
	FAM20C	2.25952	2.69699e-11	3.47353e-10		MCM7	1.90588	2.17814e-11	3.11837e-10		CBLC	-1.39669	0.00139789	0.0310285
	SNRNP48	1.33332	2.73545e-11	3.52025e-10		EGR1	2.28544	2.18037e-11	3.11879e-10		ENSSSCG00000053961	-3.39915	0.00146727	0.031803
	ACHE	2.7214	2.78985e-11	3.58448e-10		PABPC4	1.28492	2.37825e-11	3.38132e-10		CA8	-1.39173	0.00153564	0.0329399
	BDKRB2	1.70934	2.83227e-11	3.63607e-10		PCSK6	1.46306	2.40492e-11	3.41562e-10		CCR2	-1.2004	0.00154601	0.0331139
	HNRNPA1	1.49616	2.85354e-11	3.66044e-10		ENSSSCG00000016737	1.25871	2.54166e-11	3.60028e-10		STAP2	-1.2087	0.00156003	0.0332202
	NELFA	1.28585	2.91037e-11	3.73035e-10		ADAMTSL3	1.59019	2.63171e-11	3.72454e-10		DDIT4L	-1.05291	0.00157734	0.0334432
	ENSSSCG00000002259	1.18497	2.97484e-11	3.8069e-10		PITRM1	1.26636	2.65966e-11	3.75417e-10		ENOSF1	-1.24754	0.00159029	0.0335709
	ENSSSCG00000060702	3.32903	3.02877e-11	3.87281e-10		SLC26A2	1.13134	2.65543e-11	3.75417e-10		PLGRKT	-1.099	0.00162352	0.0337986
	COL6A1	1.73626	3.12198e-11	3.98246e-10		WHAMM	1.34599	2.69721e-11	3.80382e-10		IDH1	-1.12199	0.00163945	0.0340708
	DPP6	3.28345	3.13572e-11	3.99361e-10		ENSSSCG00000013600	1.17266	2.86453e-11	4.01861e-10		EXPH5	-1.26332	0.00165149	0.0341277
	SLC41A1	1.73874	3.15578e-11	4.01278e-10		HAL	5.212	3.06322e-11	4.28237e-10		ST6GALNAC1	-1.02505	0.00165055	0.0341277
	CXCL8	2.77543	3.1862e-11	4.04183e-10		WDR83OS	1.09238	3.14152e-11	4.37279e-10		TPPP	-1.0335	0.00166888	0.0343457
	SFN	7.75518	3.18963e-11	4.04298e-10		ENSSSCG00000046579	1.21942	3.27806e-11	4.551e-10		GNLY	-1.02838	0.0016936	0.0347531
	SMO	1.84488	3.3074e-11	4.18894e-10		SLC20A1	1.47647	3.30829e-11	4.58901e-10		ENSSSCG00000023584	-1.12931	0.00178312	0.0358382
	PASK	2.3262	3.35228e-11	4.24243e-10		MGAM	3.24219	3.34032e-11	4.62943e-10		ABCG5	-1.44992	0.0017822	0.0358382
	ADCY8	2.41092	3.35497e-11	4.24248e-10		PML	1.40052	3.37664e-11	4.66767e-10		SLC27A4	-1.30955	0.00180343	0.0361475
	SH3PXD2A	2.04241	3.38317e-11	4.27475e-10		SIK1	1.51443	3.39713e-11	4.69196e-10		PTGES3L	-1.10827	0.0018072	0.0361736
	MLXIP	1.80991	3.43586e-11	4.33791e-10		MYC	2.23013	3.55533e-11	4.90623e-10		ENSSSCG00000033716	-1.39002	0.00182009	0.0362831
	CLN8	1.63063	3.5965e-11	4.53714e-10		ENSSSCG00000048169	2.29893	3.72474e-11	5.118e-10		SHLD2	-1.0799	0.00186424	0.036813
	BMP2	2.42737	3.5996e-11	4.53748e-10		EIF3L	1.29808	3.81495e-11	5.233e-10		ACOT6	-1.31228	0.00189511	0.0371205
	TULP3	1.74002	3.68812e-11	4.64175e-10		TMEM259	1.00224	3.94473e-11	5.40179e-10		GUCY2C	-1.10829	0.0018935	0.0371205
	IFRD2	1.80478	3.70951e-11	4.66501e-10		FBRS	1.11837	3.98122e-11	5.44711e-10		ENSSSCG00000029289	-2.49362	0.00189752	0.0371205
	DERPC	1.19106	3.76636e-11	4.72907e-10		SUN2	1.24307	4.03482e-11	5.51574e-10		ENSSSCG00000054032	-1.55008	0.00196994	0.0381456
	PIK3C2G	4.42517	3.81628e-11	4.7805e-10		ZBTB24	1.00081	4.09967e-11	5.59487e-10		LRRC19	-1.15763	0.0019931	0.0384267
	B3GNT3	2.20238	3.83552e-11	4.80085e-10		WDR24	1.08701	4.11694e-11	5.61366e-10		GPD1	-1.8072	0.00199585	0.0384294
	DCAF15	1.28093	3.84069e-11	4.80356e-10		CRMP1	3.23717	4.26274e-11	5.79769e-10		ZNF613	-1.00855	0.00201893	0.03857
	FHIP1B	1.47699	3.87251e-11	4.83203e-10		SUV39H1	1.75497	4.34506e-11	5.89873e-10		ABCC2	-1.63222	0.00214078	0.0401657
	TBC1D17	1.48262	3.95605e-11	4.9286e-10		MLXIP	1.41681	4.45519e-11	6.03387e-10		PDZD3	-1.39288	0.00215345	0.0402391
	ENSSSCG00000058828	2.74948	4.11958e-11	5.11242e-10		GNB2	1.03396	4.61752e-11	6.24845e-10		HAAO	-1.02505	0.00217337	0.040518
	TGFBR2	1.33232	4.32998e-11	5.36522e-10		SLC48A1	1.43936	4.63446e-11	6.26608e-10		ENSSSCG00000003248	-1.53428	0.00217927	0.0405251
	SH3BP4	1.63815	4.66148e-11	5.74928e-10		FHIP1B	1.22108	4.75188e-11	6.41403e-10		ENSSSCG00000040197	-1.35316	0.00220416	0.0407298
	PIAS3	1.39853	4.90734e-11	6.03392e-10		EIF3B	1.33761	4.90644e-11	6.6171e-10		BDH2	-1.18988	0.00225368	0.0413132
	ENSSSCG00000056202	1.53816	4.95906e-11	6.09283e-10		ENSSSCG00000062387	5.9854	5.09355e-11	6.85792e-10		ENDOU	-1.41207	0.00227334	0.0414505
	KCTD17	2.12191	5.03964e-11	6.18235e-10		CDCA7	2.11329	5.19687e-11	6.98576e-10		SOSTDC1	-1.56149	0.00229348	0.0414798
	PML	1.82236	5.07084e-11	6.21585e-10		CAPN2	1.66703	5.21264e-11	7.00064e-10		ENSSSCG00000027538	-1.01428	0.00229248	0.0414798
	HAL	4.98985	5.29009e-11	6.47965e-10		ENSSSCG00000039713	1.90927	5.64704e-11	7.52736e-10		TRAPPC6A	-1.28016	0.00228629	0.0414798
	TUBA4A	2.66249	5.34353e-11	6.5401e-10		ENSSSCG00000057447	3.77278	5.79009e-11	7.71164e-10		ZNF514	-1.16317	0.0023543	0.0419048
	SEH1L	1.2707	5.67407e-11	6.93405e-10		SEC61B	1.02145	5.80921e-11	7.72428e-10		THAP8	-2.19371	0.00235629	0.0419048
	CLIP3	2.09417	5.73764e-11	7.00105e-10		HILPDA	1.44435	5.92927e-11	7.8772e-10		SLC5A11	-1.653	0.00242574	0.0429317
	ENSSSCG00000052704	3.05456	6.11126e-11	7.42863e-10		ZNF592	1.04318	6.25546e-11	8.27649e-10		C11orf86	-1.07827	0.00243678	0.0430352
	SPRED3	3.3148	6.13668e-11	7.45388e-10		CDKN2D	1.19262	6.42976e-11	8.46523e-10		ARL11	-1.0108	0.00264098	0.045004
	ENSSSCG00000026302	1.96243	6.40931e-11	7.76147e-10		FARS2	1.89143	6.61852e-11	8.69236e-10		TMEM100	-1.09159	0.00277549	0.0464333
	CHST7	2.52205	6.52431e-11	7.89476e-10		ENSSSCG00000041364	3.53314	6.73673e-11	8.83498e-10		PEPD	-1.23265	0.00278905	0.046554
	MMP12	2.81753	6.53587e-11	7.90278e-10		HMCN2	1.95032	6.77917e-11	8.87429e-10		FAAH	-1.04495	0.00279598	0.0465998
	NFATC2IP	1.62201	7.13598e-11	8.57013e-10		FAM222B	1.6462	6.79009e-11	8.88134e-10		MALL	-1.12469	0.00285625	0.0472457
	TASOR2	1.27299	7.19246e-11	8.62502e-10		CRB2	3.97327	6.93417e-11	9.05504e-10		TFF1	-2.10933	0.00287732	0.0473805
	E2F2	2.06943	7.28992e-11	8.7223e-10		YTHDF1	1.33949	7.03893e-11	9.18437e-10		ENSSSCG00000041863	-1.63131	0.00287419	0.0473805
	ITPK1	2.47045	7.33217e-11	8.75975e-10		ENSSSCG00000029449	5.08272	7.07753e-11	9.22724e-10		MS4A8	-1.80839	0.0029266	0.0478696
	RFWD3	1.12126	7.32788e-11	8.75975e-10		MED15	1.17857	7.10375e-11	9.25391e-10		GALM	-1.1093	0.00293559	0.0479099
	ENSSSCG00000040441	2.44704	7.91268e-11	9.40149e-10		SLC25A3	1.4881	7.24145e-11	9.41799e-10	up-regulation lncRNAs	XLOC_039716	2.83469	9.01e-11	2.14e-07
	NR4A3	3.77495	7.99214e-11	9.48452e-10		PFKFB3	1.81822	7.2368e-11	9.41799e-10		XLOC_040657	2.61246	4.14e-11	2.14e-07
	ENSSSCG00000053072	2.65095	8.12945e-11	9.64032e-10		ENSSSCG00000045406	2.19485	7.49887e-11	9.737e-10		XLOC_049311	1.7594	6.72e-11	2.14e-07
	LIX1L	2.00466	8.15802e-11	9.65275e-10		TAC4	4.13772	7.86082e-11	1.01823e-09		XLOC_169815	7.62925	1.83e-08	1.63e-05
	MAT1A	3.08619	8.16827e-11	9.65775e-10		ITPR3	1.64731	8.03536e-11	1.04e-09		XLOC_040655	1.95507	4.97e-08	3.94e-05
	IQGAP3	2.15018	8.21802e-11	9.7094e-10		UNKL	1.45276	8.07777e-11	1.0438e-09		XLOC_170411	2.10978	1.02e-07	6.07e-05
	ENSSSCG00000003253	1.58299	8.28322e-11	9.7792e-10		ENSSSCG00000052435	1.87123	8.16965e-11	1.05313e-09		XLOC_186244	1.87332	2.5e-07	0.000118949
	URB1	1.98123	8.76377e-11	1.02859e-09		DGKD	1.18024	8.35874e-11	1.07578e-09		ENSSSCG00000061864	2.58562	2.76e-07	0.000123187
	HTRA2	1.20753	8.92193e-11	1.04562e-09		NUP214	1.18861	8.56114e-11	1.10006e-09		XLOC_202705	1.32213	4.87e-07	0.00019329
	ENSSSCG00000054111	2.10484	9.14428e-11	1.06933e-09		LIX1L	1.66518	8.95449e-11	1.14693e-09		ENSSSCG00000056235	1.70126	5.54e-07	0.0002082
	TNS1	1.73571	9.18856e-11	1.07372e-09		POLR1B	1.32099	9.0419e-11	1.15721e-09		XLOC_050384	2.59523	1.32e-06	0.00039369
	G0S2	2.66459	9.32335e-11	1.0863e-09		HM13	1.26669	9.80963e-11	1.25048e-09		ENSSSCG00000061578	1.20765	1.64e-06	0.000433596
	NOC4L	2.15551	9.35234e-11	1.08888e-09		LENG8	1.27286	9.96198e-11	1.26889e-09		XLOC_200198	1.66148	1.63e-06	0.000433596
	GARNL3	1.64503	9.49797e-11	1.10423e-09		PACS2	1.44786	9.9827e-11	1.27052e-09		ENSSSCG00000035996	1.92503	2.22e-06	0.000527613
	CDKN2D	1.77717	9.78156e-11	1.13473e-09		KCNK1	1.40502	1.01345e-10	1.28881e-09		XLOC_138354	2.12509	3.48e-06	0.000709042
	ENSSSCG00000047543	3.35214	1.00766e-10	1.16727e-09		ZBTB21	1.68123	1.01859e-10	1.29432e-09		XLOC_139949	1.60868	4.2e-06	0.000810541
	FOS	3.21603	1.0144e-10	1.17423e-09		PLPP2	1.77808	1.03851e-10	1.31859e-09		ENSSSCG00000057738	1.9379	4.67e-06	0.000877022
	FBRS	1.27593	1.02385e-10	1.18431e-09		ATP13A2	1.12891	1.05233e-10	1.33509e-09		ENSSSCG00000041050	2.05851	6.53e-06	0.00106347
	SLC45A3	1.73685	1.02737e-10	1.18752e-09		ENSSSCG00000001734	1.50783	1.05585e-10	1.3385e-09		ENSSSCG00000063037	2.26555	6.65e-06	0.00106347
	HMCN2	2.71052	1.08867e-10	1.25532e-09		NUP133	1.23145	1.07063e-10	1.35509e-09		XLOC_186242	1.40964	6.39e-06	0.00106347
	ENSSSCG00000039972	1.39269	1.12101e-10	1.2911e-09		RPTOR	1.35012	1.07803e-10	1.36338e-09		ENSSSCG00000056754	2.04418	7.88e-06	0.00119698
	STRADA	1.36517	1.13021e-10	1.30075e-09		ENSSSCG00000044211	1.83073	1.12398e-10	1.41926e-09		XLOC_039563	1.16703	8.73e-06	0.00129911
	ENSSSCG00000046579	1.37181	1.14565e-10	1.31664e-09		H2AX	2.036	1.13134e-10	1.42743e-09		XLOC_248807	1.13232	9.31e-06	0.00135643
	DISP3	5.12982	1.19305e-10	1.36572e-09		LMF2	1.19412	1.15401e-10	1.45489e-09		ENSSSCG00000062943	1.59323	1.12e-05	0.00154008
	CPT1C	2.11479	1.22092e-10	1.39512e-09		FGFBP1	8.03785	1.16632e-10	1.4681e-09		ENSSSCG00000047982	1.43185	1.26e-05	0.00166747
	PCBP3	3.73252	1.24458e-10	1.42115e-09		SYP	2.09191	1.16741e-10	1.46831e-09		XLOC_203310	1.21419	1.25e-05	0.00166747
	TCIRG1	1.81574	1.33509e-10	1.52124e-09		POLE	1.47882	1.17205e-10	1.473e-09		XLOC_031151	1.31791	1.51e-05	0.00189265
	TRIP13	1.78836	1.37304e-10	1.56226e-09		PI4K2A	1.05325	1.23099e-10	1.54587e-09		ENSSSCG00000061000	1.64847	2.02e-05	0.00229043
	ENSSSCG00000051789	1.97513	1.37992e-10	1.56786e-09		NOP9	1.11392	1.28119e-10	1.60514e-09		XLOC_001365	1.51347	2.01e-05	0.00229043
	GAB2	1.38125	1.4568e-10	1.65053e-09		RIC8A	1.25121	1.32202e-10	1.655e-09		XLOC_265769	6.6905	2.34e-05	0.00257482
	PELP1	2.07279	1.46845e-10	1.66019e-09		ANKRD11	1.05711	1.34301e-10	1.67997e-09		XLOC_083233	1.31619	2.66e-05	0.00283722
	SPDEF	2.66245	1.48969e-10	1.68184e-09		EDN1	2.85778	1.40727e-10	1.75625e-09		ENSSSCG00000044913	1.91621	2.87e-05	0.00286148
	MEF2D	1.47552	1.4947e-10	1.6863e-09		ADAMTS15	2.48132	1.45528e-10	1.81334e-09		XLOC_222601	4.00895	2.93e-05	0.00286148
	EEF1A2	2.17127	1.55306e-10	1.74844e-09		DDX51	1.03617	1.48937e-10	1.85151e-09		XLOC_038880	2.74934	3.73e-05	0.00341847
	ENSSSCG00000047586	2.20449	1.60531e-10	1.80347e-09		PHLPP1	1.52726	1.49238e-10	1.8538e-09		XLOC_112799	1.29367	4.13e-05	0.00359688
	CPSF7	1.41171	1.68203e-10	1.88305e-09		MDN1	1.33707	1.51968e-10	1.8848e-09		XLOC_060763	1.06174	4.44e-05	0.00382101
	BMP7	1.51841	1.69725e-10	1.89876e-09		ELAVL1	1.00624	1.5643e-10	1.93715e-09		XLOC_060757	1.25403	4.94e-05	0.0040603
	SPIDR	1.4504	1.709e-10	1.91057e-09		ENSSSCG00000032364	1.53985	1.58704e-10	1.96077e-09		XLOC_056654	1.30326	5.35e-05	0.00433655
	COPS3	1.08762	1.7874e-10	1.99404e-09		MTX1	1.49128	1.61724e-10	1.99501e-09		ENSSSCG00000044372	2.42859	5.61e-05	0.00449737
	CTC1	1.84939	1.78702e-10	1.99404e-09		DUOXA2	3.46905	1.7275e-10	2.12125e-09		XLOC_222394	1.42531	6.1e-05	0.00481
	ENSSSCG00000035226	3.38966	1.79283e-10	1.99871e-09		TRIM16	1.60343	1.77609e-10	2.17425e-09		XLOC_112617	3.15863	6.62e-05	0.00513364
	PTBP1	1.86568	1.8322e-10	2.04118e-09		ENSSSCG00000032591	1.53734	1.79496e-10	2.19233e-09		XLOC_154218	3.21963	6.77e-05	0.00514376
	JADE2	1.9063	1.85053e-10	2.06016e-09		MAT1A	3.44165	1.87345e-10	2.28472e-09		XLOC_112499	1.45564	7.08e-05	0.00526253
	PELI2	1.99121	1.87587e-10	2.08258e-09		HEATR6	1.02249	1.96278e-10	2.38642e-09		XLOC_050316	2.1587	9.05e-05	0.00622571
	SLCO4A1	3.40823	1.95789e-10	2.16314e-09		PRRC1	1.25291	2.03854e-10	2.47104e-09		ENSSSCG00000047862	2.08442	9.4e-05	0.00638994
	SLC2A4	2.32476	1.96122e-10	2.16532e-09		FNTB	1.21421	2.06822e-10	2.50513e-09		ENSSSCG00000053144	1.6244	9.87e-05	0.00658396
	DGKH	1.49092	1.96435e-10	2.16728e-09		ENSSSCG00000043400	3.15077	2.12766e-10	2.57129e-09		XLOC_048924	1.86783	0.000106847	0.00699796
	ACACA	1.27751	1.99792e-10	2.20129e-09		PAPPA2	1.65634	2.17057e-10	2.62118e-09		XLOC_128620	2.24594	0.000112971	0.00700598
	LIFR	2.01231	2.06311e-10	2.26905e-09		BORA	1.60388	2.18267e-10	2.63183e-09		XLOC_202709	1.24087	0.000113839	0.00700598
	ENSSSCG00000043574	1.63805	2.07635e-10	2.27985e-09		SLC35E4	1.66268	2.18698e-10	2.63307e-09		XLOC_219235	1.12743	0.000112748	0.00700598
	SRRM2	1.37809	2.09112e-10	2.2945e-09		ENSSSCG00000051213	2.20839	2.21401e-10	2.66362e-09		XLOC_138336	1.11342	0.000116908	0.00713336
	ENSSSCG00000043454	2.57082	2.10371e-10	2.30673e-09		VCP	1.17245	2.23927e-10	2.68997e-09		XLOC_005780	1.00288	0.000120399	0.00722295
	FOXK2	1.63447	2.16215e-10	2.36756e-09		COMTD1	1.35166	2.24562e-10	2.69558e-09		XLOC_082258	1.16534	0.000121705	0.00724042
	ENSSSCG00000028527	1.61715	2.16424e-10	2.36824e-09		KLF16	1.25183	2.28081e-10	2.73373e-09		ENSSSCG00000063122	1.9952	0.000122738	0.00724156
	TSC2	1.10924	2.27811e-10	2.49114e-09		ACTR1B	1.0593	2.28439e-10	2.73598e-09		ENSSSCG00000056370	2.07368	0.000123771	0.00724262
	FFAR4	2.79268	2.28234e-10	2.49406e-09		PRRC2A	1.01855	2.40402e-10	2.8707e-09		XLOC_002519	1.34962	0.00012519	0.00726614
	TANC1	1.172	2.32749e-10	2.53648e-09		ENSSSCG00000037565	2.06054	2.49222e-10	2.97159e-09		XLOC_236467	1.07704	0.000127514	0.0073413
	ENSSSCG00000047713	2.44408	2.326e-10	2.53648e-09		FAAP100	1.04912	2.53316e-10	3.01369e-09		XLOC_153541	2.61688	0.000128824	0.0073574
	ENSSSCG00000045470	8.12584	2.33687e-10	2.5415e-09		RNPEP	1.09762	2.55557e-10	3.0381e-09		XLOC_154298	1.51141	0.000130427	0.00738981
	ENSSSCG00000033550	2.79991	2.36557e-10	2.57097e-09		IFNB1	8.40545	2.61855e-10	3.10836e-09		XLOC_000196	1.12366	0.000132799	0.00746496
	PHLDB1	1.8077	2.43779e-10	2.64766e-09		IRF2BPL	1.30451	2.67655e-10	3.17019e-09		XLOC_187991	1.52316	0.000161462	0.00879908
	ENSSSCG00000037565	2.1129	2.54078e-10	2.75392e-09		HTRA2	1.24759	2.72794e-10	3.22681e-09		XLOC_235119	1.89306	0.000197682	0.0101529
	PI4K2A	1.41938	2.57351e-10	2.78562e-09		RABIF	1.29415	2.72838e-10	3.22681e-09		XLOC_234716	1.17211	0.000209018	0.0105083
	MTMR1	1.4313	2.6069e-10	2.81605e-09		ENSSSCG00000047283	2.65152	3.12804e-10	3.6805e-09		ENSSSCG00000060195	1.93614	0.000229196	0.0112783
	ADAMTSL3	1.62436	2.62913e-10	2.83433e-09		ENSSSCG00000055956	1.26365	3.21918e-10	3.78219e-09		XLOC_003313	2.41964	0.00022915	0.0112783
	RHBDF2	1.56719	2.63371e-10	2.83545e-09		SNIP1	1.24208	3.23522e-10	3.79824e-09		ENSSSCG00000045252	4.13127	0.000247091	0.0119999
	AMBRA1	1.36981	2.6818e-10	2.88527e-09		ENSSSCG00000027665	2.05357	3.34681e-10	3.92352e-09		ENSSSCG00000056579	2.55836	0.000269171	0.0126422
	AASDH	1.06379	2.82735e-10	3.03779e-09		ACOT7	1.81391	3.41988e-10	4.00041e-09		ENSSSCG00000058130	2.22244	0.000286457	0.0133661
	DAPK1	1.24415	2.86072e-10	3.06541e-09		ENSSSCG00000014822	1.15023	3.46417e-10	4.04632e-09		ENSSSCG00000051846	4.02099	0.000292156	0.0133699
	TGIF2	1.8295	2.86275e-10	3.06554e-09		WIZ	1.31004	3.48385e-10	4.06635e-09		XLOC_112941	1.75313	0.000296203	0.0133835
	SCD	2.59374	2.93636e-10	3.13806e-09		FLOT2	1.13683	3.49717e-10	4.07597e-09		ENSSSCG00000053828	1.10664	0.000311641	0.0138187
	TAPBP	1.54229	3.15822e-10	3.37108e-09		CNTNAP5	2.23856	3.55342e-10	4.13252e-09		XLOC_173499	2.12975	0.000330909	0.014493
	NFKBIA	2.38983	3.20556e-10	3.4189e-09		CEP43	1.7115	3.64259e-10	4.2301e-09		XLOC_039968	1.7436	0.000355973	0.0153091
	ENSSSCG00000058119	1.93058	3.20863e-10	3.41991e-09		DOP1B	1.56767	3.73106e-10	4.32657e-09		XLOC_186931	2.20277	0.000355977	0.0153091
	ZC3H18	1.09444	3.23404e-10	3.44335e-09		LYZ	1.98904	3.7447e-10	4.33926e-09		XLOC_048858	1.80113	0.000371347	0.0158745
	ADAMTS4	5.03229	3.2388e-10	3.44518e-09		ACSM3	1.59818	3.95687e-10	4.55878e-09		XLOC_249432	1.41765	0.000385018	0.0161685
	FBXO41	2.73533	3.28184e-10	3.4817e-09		WDR6	1.41765	4.13878e-10	4.75131e-09		XLOC_096840	2.34212	0.000393071	0.0162204
	ITPR3	1.94165	3.36326e-10	3.56337e-09		CNIH4	1.40278	4.22359e-10	4.84175e-09		XLOC_099583	3.1818	0.000397645	0.0163149
	C2	2.31397	3.59241e-10	3.79197e-09		MCRS1	1.03037	4.28676e-10	4.90715e-09		ENSSSCG00000058429	2.42122	0.000416905	0.0168152
	FARS2	1.53528	3.61461e-10	3.81201e-09		E2F2	1.70698	4.36897e-10	4.99769e-09		XLOC_039151	2.06856	0.000414606	0.0168152
	MAST2	1.74498	3.64087e-10	3.83465e-09		SLC5A5	5.51429	4.89581e-10	5.5765e-09		XLOC_197784	1.19728	0.000438125	0.0173765
	CD274	2.35913	3.73309e-10	3.92403e-09		MTMR1	1.0819	4.95623e-10	5.64131e-09		XLOC_129564	1.21308	0.000441808	0.0174258
	IPO9	1.25304	3.77581e-10	3.96113e-09		PIM1	1.68913	5.02355e-10	5.70985e-09		ENSSSCG00000047761	1.43482	0.000445794	0.0174408
	G6PC3	1.73558	3.84952e-10	4.03054e-09		RFT1	1.32519	5.09686e-10	5.78907e-09		ENSSSCG00000056254	2.45236	0.000452185	0.0174495
	GLIS3	1.54577	3.91728e-10	4.09613e-09		ENSSSCG00000041494	1.53125	5.47814e-10	6.20457e-09		ENSSSCG00000043066	1.1377	0.000479129	0.0182914
	XRRA1	1.97153	3.9352e-10	4.11219e-09		DHX16	1.24184	5.6079e-10	6.34258e-09		ENSSSCG00000056958	4.13269	0.000501762	0.018586
	SERPING1	1.77315	3.94112e-10	4.11568e-09		ZNF414	1.94338	5.88455e-10	6.63211e-09		ENSSSCG00000059819	1.27995	0.000511958	0.018586
	ENSSSCG00000054113	3.3761	3.95882e-10	4.13147e-09		ENSSSCG00000039658	1.49314	5.98439e-10	6.73517e-09		XLOC_030900	1.12687	0.00051288	0.018586
	SNAPC4	1.57306	3.97864e-10	4.14945e-09		TM7SF2	1.86532	6.12667e-10	6.88564e-09		ENSSSCG00000055407	3.3889	0.000516051	0.0186065
	BCL6	2.39766	4.11215e-10	4.27199e-09		ZSWIM4	1.44737	6.18185e-10	6.94279e-09		XLOC_173188	1.39016	0.00053863	0.0192264
	CHST14	1.50829	4.16333e-10	4.32235e-09		ENSSSCG00000050876	1.83203	6.4648e-10	7.2555e-09		ENSSSCG00000057135	1.06304	0.000550622	0.019364
	TRIM35	1.16007	4.2001e-10	4.3577e-09		ZNF219	1.47018	6.55009e-10	7.33582e-09		XLOC_155076	2.33818	0.000547221	0.019364
	RALY	1.23058	4.23002e-10	4.3859e-09		TMEM107	1.744	6.7021e-10	7.49039e-09		XLOC_155440	1.46053	0.000549337	0.019364
	PPL	2.76781	4.2658e-10	4.42014e-09		BOLA1	1.08274	7.25727e-10	8.08833e-09		ENSSSCG00000063171	1.22396	0.000587887	0.020081
	SHISA5	1.57772	4.48792e-10	4.63231e-09		ENSSSCG00000003047	4.62714	7.42331e-10	8.24476e-09		XLOC_153699	2.18468	0.000605179	0.0204757
	ENSSSCG00000044064	3.11625	4.5279e-10	4.67056e-09		ENSSSCG00000008984	1.11529	7.42256e-10	8.24476e-09		XLOC_029985	1.39966	0.000617198	0.0207838
	SCN11A	1.63882	4.58384e-10	4.72218e-09		ENSSSCG00000058357	2.00734	7.45073e-10	8.26949e-09		ENSSSCG00000058952	1.33304	0.000636708	0.0210438
	AMPD3	2.12106	4.64311e-10	4.77403e-09		ENSSSCG00000044013	2.25175	7.81997e-10	8.66133e-09		XLOC_200759	1.1711	0.000636475	0.0210438
	IDO1	4.41751	4.66015e-10	4.78791e-09		ENSSSCG00000054111	1.5981	7.98696e-10	8.83743e-09		XLOC_186425	1.60704	0.000640419	0.0210689
	SH3RF2	2.10655	4.97382e-10	5.08142e-09		CRIP2	1.17536	8.08826e-10	8.93998e-09		ENSSSCG00000053486	1.40226	0.00065571	0.0212778
	TNRC18	1.56452	5.02614e-10	5.12833e-09		HK2	3.18781	8.31329e-10	9.16976e-09		XLOC_185970	1.60873	0.000663305	0.0214269
	ENSSSCG00000044562	3.4406	5.10573e-10	5.20291e-09		TNS4	2.36147	8.49206e-10	9.34767e-09		ENSSSCG00000052793	1.61029	0.000700633	0.0221797
	LTBP3	2.05564	5.12094e-10	5.21509e-09		CYB5R3	1.34534	8.65795e-10	9.51722e-09		XLOC_187993	2.77107	0.000702144	0.0221797
	UNC79	1.58394	5.21235e-10	5.3048e-09		ABCG1	2.82834	8.97336e-10	9.83027e-09		XLOC_250509	1.1004	0.000692325	0.0221797
	MYO1E	1.19181	5.47603e-10	5.56255e-09		ENSSSCG00000045769	1.95892	9.18417e-10	1.00544e-08		XLOC_000319	1.27563	0.00071925	0.0224383
	PRMT1	1.41934	5.49409e-10	5.57736e-09		TMEM200A	3.38252	9.4394e-10	1.03243e-08		XLOC_099878	1.90604	0.00071617	0.0224383
	ATP1A3	2.78976	5.79911e-10	5.87582e-09		FLVCR2	2.58487	9.45007e-10	1.03243e-08		XLOC_171850	1.23969	0.000734953	0.0227136
	GPRC5A	6.28696	5.85025e-10	5.92388e-09		ENSSSCG00000060071	2.94507	9.47212e-10	1.03414e-08		ENSSSCG00000057901	2.86889	0.000751256	0.0229197
	MRPL38	1.68147	5.95839e-10	6.02957e-09		EVPL	2.29258	9.57261e-10	1.0444e-08		XLOC_047782	1.72059	0.000783857	0.0236164
	WASF3	1.33434	6.28398e-10	6.34631e-09		FAM83H	1.24343	9.65359e-10	1.05252e-08		XLOC_201208	1.64427	0.000825451	0.0243508
	ENSSSCG00000033183	3.08153	6.37619e-10	6.43204e-09		BRD1	1.1296	9.75897e-10	1.06328e-08		XLOC_039767	2.04384	0.000880449	0.0256836
	TESK1	1.1221	6.43033e-10	6.47441e-09		HNRNPA1	1.31653	1.05232e-09	1.14036e-08		XLOC_185040	1.32525	0.000874809	0.0256836
	MYC	2.19923	6.51244e-10	6.54885e-09		NETO2	1.72607	1.07633e-09	1.16402e-08		XLOC_202214	1.58504	0.000991526	0.0276504
	MCM7	2.1102	6.53211e-10	6.5645e-09		TLNRD1	1.00758	1.11856e-09	1.20725e-08		XLOC_006042	1.13746	0.00100346	0.0277969
	SYNGAP1	3.02697	6.70139e-10	6.72618e-09		KLHL21	1.08904	1.13762e-09	1.22617e-08		ENSSSCG00000057293	1.22802	0.00101544	0.0278816
	ENSSSCG00000011162	1.15869	6.71243e-10	6.73304e-09		CDC20	1.80592	1.1661e-09	1.25518e-08		XLOC_049506	1.23764	0.00104857	0.0279086
	UBE3C	1.21809	6.76902e-10	6.78131e-09		MST1R	1.6619	1.17181e-09	1.26027e-08		XLOC_121074	2.52184	0.0010439	0.0279086
	ALPL	3.38423	6.97679e-10	6.972e-09		PWP2	1.37098	1.1724e-09	1.26027e-08		XLOC_135843	1.92312	0.00110067	0.0288885
	CDKN1C	2.31188	6.99387e-10	6.98471e-09		SHKBP1	1.45536	1.17765e-09	1.26346e-08		ENSSSCG00000062694	2.12668	0.0011457	0.0297245
	ARFGEF3	1.6824	7.01205e-10	6.9946e-09		ENSSSCG00000047828	1.24334	1.17773e-09	1.26346e-08		XLOC_157604	1.39026	0.00114917	0.0297245
	PIGT	1.74217	7.11995e-10	7.09734e-09		MED27	1.41038	1.19725e-09	1.28355e-08		XLOC_081286	4.59082	0.00115925	0.0297693
	GALNT6	1.67276	7.17729e-10	7.15004e-09		XPO6	1.2353	1.22022e-09	1.30643e-08		XLOC_083577	1.48705	0.00119427	0.0303414
	NAPB	1.94446	7.37616e-10	7.34359e-09		ENSSSCG00000048195	1.66476	1.22785e-09	1.31371e-08		ENSSSCG00000058565	1.03228	0.00120756	0.030474
	FAM89A	2.49376	7.44584e-10	7.40225e-09		RBM22	1.02093	1.23114e-09	1.31636e-08		XLOC_031265	1.75153	0.00121868	0.030474
	IL22RA2	2.5	7.50462e-10	7.45294e-09		APBA3	1.30318	1.23827e-09	1.3231e-08		XLOC_097939	1.42017	0.00121332	0.030474
	ENSSSCG00000038187	1.58999	7.51984e-10	7.46343e-09		DOT1L	1.14512	1.24952e-09	1.33424e-08		XLOC_219742	1.67954	0.00121104	0.030474
	MPST	2.30999	7.74136e-10	7.66903e-09		CIC	1.26554	1.31098e-09	1.39801e-08		ENSSSCG00000055754	1.96057	0.0012441	0.0305925
	DDX23	1.0992	7.78259e-10	7.7051e-09		GABBR2	4.09685	1.36442e-09	1.45306e-08		XLOC_081350	1.6002	0.00124418	0.0305925
	ENSSSCG00000050087	2.97859	7.79354e-10	7.71117e-09		ENSSSCG00000058108	1.01992	1.38425e-09	1.4732e-08		XLOC_040656	1.79603	0.00131256	0.031764
	PLK3	2.17217	7.81192e-10	7.72459e-09		PDSS1	1.21503	1.44397e-09	1.53472e-08		ENSSSCG00000042041	1.00715	0.00132796	0.0318308
	GMEB1	1.07024	7.82278e-10	7.73055e-09		RNFT2	2.51067	1.48221e-09	1.57433e-08		XLOC_099843	2.00303	0.00134766	0.0318574
	DOT1L	1.40909	7.93752e-10	7.81499e-09		ENSSSCG00000034524	1.4084	1.48779e-09	1.5792e-08		ENSSSCG00000059777	2.12746	0.00139337	0.0325074
	NFKBIB	1.79872	8.07562e-10	7.94607e-09		CCDC97	1.2216	1.52132e-09	1.61266e-08		XLOC_079810	1.10064	0.0013919	0.0325074
	SEC31B	1.336	8.19357e-10	8.05223e-09		SCARF2	1.99002	1.53338e-09	1.62416e-08		ENSSSCG00000055499	2.01108	0.00139867	0.0325248
	GRIK4	1.69067	8.24532e-10	8.09812e-09		NPLOC4	1.03477	1.54391e-09	1.63337e-08		ENSSSCG00000046010	1.87154	0.00150422	0.0332231
	SDC1	1.8499	8.30738e-10	8.14907e-09		MCM2	1.63172	1.61068e-09	1.69841e-08		ENSSSCG00000053361	1.60753	0.00151247	0.0332231
	MN1	2.09444	8.44542e-10	8.27941e-09		IQGAP3	1.88076	1.63365e-09	1.72117e-08		ENSSSCG00000058416	1.19977	0.00150736	0.0332231
	NPLOC4	1.28505	8.63668e-10	8.44106e-09		G6PD	1.13448	1.70336e-09	1.78791e-08		XLOC_001987	1.17429	0.00150372	0.0332231
	ENSSSCG00000056711	2.6858	8.63573e-10	8.44106e-09		USP42	1.24105	1.70656e-09	1.7901e-08		XLOC_031684	1.32861	0.00150067	0.0332231
	MLLT1	1.35475	8.83735e-10	8.62666e-09		RETNLB	1.42125	1.73683e-09	1.81947e-08		XLOC_129605	1.76586	0.00147285	0.0332231
	ENSSSCG00000042766	2.29597	9.16572e-10	8.93629e-09		TMEM201	2.07074	1.74369e-09	1.82428e-08		XLOC_188110	3.11901	0.00151206	0.0332231
	HTRA3	1.71718	9.29e-10	9.04645e-09		TAPBP	1.53843	1.75042e-09	1.83013e-08		XLOC_222635	1.54568	0.00148323	0.0332231
	CCDC138	1.71545	9.49177e-10	9.2317e-09		ENSSSCG00000048763	1.46918	1.77925e-09	1.85785e-08		XLOC_265745	8.19622	0.00149163	0.0332231
	CLDN5	2.52343	1.02285e-09	9.93616e-09		SENP3	1.03665	1.84742e-09	1.92527e-08		ENSSSCG00000052336	3.36451	0.00154782	0.0337494
	PCDH8	4.05965	1.02485e-09	9.9496e-09		FBXL6	1.73618	1.87221e-09	1.94858e-08		XLOC_249233	1.46587	0.00160453	0.0343422
	APOLD1	3.1776	1.02619e-09	9.95654e-09		PIAS3	1.15251	1.91406e-09	1.98955e-08		XLOC_081024	2.11983	0.00161668	0.0344521
	ENSSSCG00000014800	2.56342	1.02737e-09	9.96095e-09		ENSSSCG00000046740	1.45778	2.02356e-09	2.09253e-08		ENSSSCG00000055373	1.27324	0.00167234	0.0354268
	SYN2	2.56427	1.02789e-09	9.96095e-09		ENSSSCG00000028397	1.00906	2.06994e-09	2.13912e-08		XLOC_173293	2.8291	0.00170201	0.0359486
	ENSSSCG00000056247	3.19639	1.05362e-09	1.01856e-08		CYTB	1.27483	2.08081e-09	2.14759e-08		XLOC_122414	3.32051	0.00176965	0.0367006
	RANBP3	1.22665	1.07757e-09	1.03983e-08		GTF3C4	1.09207	2.10222e-09	2.16829e-08		XLOC_169799	1.18977	0.0017736	0.0367006
	IRS2	1.62408	1.07698e-09	1.03983e-08		RABGGTA	1.74572	2.14981e-09	2.21453e-08		XLOC_058164	1.17753	0.00182625	0.0373571
	ZFP36	3.06367	1.08226e-09	1.0431e-08		RAC1	1.28598	2.20819e-09	2.2732e-08		ENSSSCG00000051073	1.20526	0.00183968	0.0374174
	ENSSSCG00000011850	7.10952	1.13866e-09	1.09597e-08		WDCP	1.64993	2.27014e-09	2.33249e-08		XLOC_039712	3.63299	0.00185643	0.0374382
	ADORA2B	2.43179	1.15977e-09	1.11378e-08		ENSSSCG00000058071	2.15389	2.40539e-09	2.46514e-08		ENSSSCG00000052485	1.68806	0.00187392	0.0374731
	SLC20A2	1.92514	1.16332e-09	1.11594e-08		ACVR1B	1.21003	2.42293e-09	2.47995e-08		XLOC_267776	1.00988	0.00189959	0.0376976
	UNC13D	2.11841	1.16341e-09	1.11594e-08		PSME3	1.40162	2.42642e-09	2.48036e-08		XLOC_200850	1.72365	0.00191046	0.0377805
	ENSSSCG00000047196	1.5164	1.22417e-09	1.17001e-08		MLF2	1.19635	2.44523e-09	2.49799e-08		ENSSSCG00000055035	1.35401	0.00196687	0.038329
	GRK6	1.06103	1.23803e-09	1.18255e-08		PAK4	1.36999	2.50431e-09	2.55348e-08		XLOC_081736	1.23006	0.00196808	0.038329
	PCDHGA4	1.30683	1.26001e-09	1.20283e-08		SP6	4.50215	2.56097e-09	2.60958e-08		XLOC_219575	4.4426	0.00197041	0.038329
	NTRK3	3.21485	1.27516e-09	1.21657e-08		CASZ1	1.59286	2.60827e-09	2.65274e-08		ENSSSCG00000059179	1.16978	0.00199781	0.0384
	ENSSSCG00000055956	1.57947	1.28043e-09	1.22087e-08		NCAPD2	1.28041	2.64963e-09	2.6931e-08		XLOC_097566	1.35712	0.00199108	0.0384
	MAP3K3	1.66763	1.28264e-09	1.22225e-08		ELAC2	1.21953	2.67675e-09	2.71894e-08		XLOC_171761	1.05365	0.0020384	0.0390137
	ND4L	1.50462	1.28843e-09	1.22704e-08		ENSSSCG00000043454	2.12437	2.78572e-09	2.82248e-08		XLOC_129083	1.16637	0.00205358	0.0391992
	PTPRE	1.35793	1.2907e-09	1.22847e-08		DPYSL2	1.41361	2.78911e-09	2.82413e-08		XLOC_000195	1.03491	0.00207319	0.039468
	ENSSSCG00000039956	3.27213	1.29404e-09	1.23091e-08		APRT	1.06508	2.8262e-09	2.85988e-08		ENSSSCG00000055422	1.17287	0.00208508	0.0395329
	GCN1	1.19603	1.29941e-09	1.2352e-08		ABCF2	1.39701	2.86735e-09	2.8997e-08		ENSSSCG00000041768	1.46963	0.002101	0.0396381
	SLC38A2	1.06608	1.30761e-09	1.2416e-08		GPS1	1.08168	2.97292e-09	2.99701e-08		ENSSSCG00000060056	1.64	0.00210434	0.0396381
	KATNAL1	1.25701	1.31306e-09	1.24604e-08		ENSSSCG00000029430	1.56847	2.98286e-09	3.00514e-08		ENSSSCG00000056717	2.25498	0.00217178	0.0403758
	ENSSSCG00000047643	2.14538	1.33693e-09	1.26719e-08		BLVRB	2.04906	3.03262e-09	3.04762e-08		XLOC_186179	1.2	0.00222681	0.0412915
	RTKN2	1.59096	1.37096e-09	1.29868e-08		GTSE1	1.6145	3.08066e-09	3.09202e-08		ENSSSCG00000052902	1.2143	0.0022472	0.0415616
	ENSSSCG00000045051	3.61527	1.41633e-09	1.34007e-08		NFIC	1.24832	3.15106e-09	3.15874e-08		ENSSSCG00000041983	1.23113	0.00232983	0.0424302
	ZNF335	1.22346	1.43653e-09	1.35758e-08		ENSSSCG00000050087	2.55864	3.33944e-09	3.33715e-08		ENSSSCG00000055638	1.20135	0.00232748	0.0424302
	PIK3CB	1.20084	1.47866e-09	1.3941e-08		ANKLE1	1.66958	3.38041e-09	3.3718e-08		ENSSSCG00000058384	2.63766	0.00231329	0.0424302
	TNFAIP2	2.62485	1.48888e-09	1.40133e-08		SLC25A30	1.04155	3.48205e-09	3.47102e-08		XLOC_079640	1.24726	0.00232399	0.0424302
	CD24	1.59116	1.48895e-09	1.40133e-08		ENSSSCG00000056430	1.51471	3.49153e-09	3.47831e-08		XLOC_269138	1.23659	0.00233958	0.0424995
	EGFR	1.4019	1.50011e-09	1.41018e-08		ENSSSCG00000048260	1.39358	3.50156e-09	3.48398e-08		ENSSSCG00000061211	1.09276	0.00236229	0.0427072
	L1CAM	1.78485	1.52585e-09	1.43185e-08		RTL6	1.0894	3.50963e-09	3.48984e-08		XLOC_129872	1.59906	0.00238396	0.0427615
	SLC9A8	1.09846	1.53844e-09	1.44282e-08		FAM177B	2.21478	3.60763e-09	3.58063e-08		XLOC_079660	1.23978	0.00241506	0.0430498
	ENSSSCG00000047083	1.91059	1.55151e-09	1.45363e-08		SPIDR	1.2168	3.6571e-09	3.62525e-08		XLOC_197731	1.06319	0.00247321	0.0437035
	FOXP1	1.53504	1.56331e-09	1.46357e-08		HASPIN	2.10419	3.99578e-09	3.94878e-08		XLOC_005375	1.29392	0.0024988	0.0439382
	ENSSSCG00000042299	2.27554	1.58177e-09	1.47998e-08		ENSSSCG00000033720	1.92185	4.0547e-09	4.00208e-08		ENSSSCG00000060109	1.59023	0.00253016	0.0440991
	BHLHE40	1.6921	1.61397e-09	1.50571e-08		TRMT44	1.49	4.08651e-09	4.031e-08		XLOC_251322	1.06087	0.00253226	0.0440991
	HGH1	1.53273	1.67172e-09	1.55596e-08		TNS2	1.4038	4.14115e-09	4.08239e-08		ENSSSCG00000052152	1.50905	0.00255203	0.0442208
	CSMD3	2.09928	1.67892e-09	1.56175e-08		STRADA	1.33044	4.39062e-09	4.31507e-08		ENSSSCG00000062180	1.05493	0.00273096	0.0459036
	ENSSSCG00000033697	1.3575	1.6823e-09	1.564e-08		MAMDC2	1.42933	4.462e-09	4.37718e-08		XLOC_000168	1.65271	0.00276052	0.0460291
	ENSSSCG00000059703	3.23359	1.68423e-09	1.56487e-08		CCR1	1.4456	4.60884e-09	4.51296e-08		XLOC_202858	1.68364	0.00279648	0.0463852
	MAML1	1.16572	1.6969e-09	1.57482e-08		H2AC19	2.64443	4.68644e-09	4.58614e-08		ENSSSCG00000060509	1.40641	0.00288605	0.0474736
	NUP98	1.17737	1.70682e-09	1.58311e-08		SCAMP3	1.19991	4.75332e-09	4.64875e-08		XLOC_002469	1.64698	0.00293726	0.0480328
	ELL	1.48216	1.71481e-09	1.5896e-08		NCAPG2	1.4948	4.83707e-09	4.71916e-08		XLOC_153818	1.60458	0.00298402	0.0484157
	MCM2	1.59509	1.7393e-09	1.61137e-08		NIBAN2	1.64874	4.84014e-09	4.71928e-08		XLOC_171877	1.85636	0.00298236	0.0484157
	C1R	1.59699	1.75105e-09	1.62131e-08		TSPAN7	1.25406	4.86989e-09	4.7454e-08		XLOC_139428	2.52226	0.00300893	0.0484921
	PTAFR	1.62994	1.77318e-09	1.64086e-08		TRPM2	2.71065	5.0787e-09	4.9339e-08		XLOC_154093	1.30043	0.00302269	0.0484921
	CSNK1D	1.25095	1.80099e-09	1.66467e-08		ENSSSCG00000062379	2.42016	5.22006e-09	5.0651e-08		XLOC_218770	1.02008	0.00301981	0.0484921
	TMCO3	1.06521	1.83687e-09	1.69587e-08		ND2	1.2094	5.38445e-09	5.212e-08		XLOC_200937	1.21628	0.00308175	0.049152
	BZW2	1.29211	1.84489e-09	1.7023e-08		STX16	1.17148	5.57809e-09	5.38321e-08		ENSSSCG00000055592	1.25403	0.00310701	0.049291
	RELA	1.20937	1.84957e-09	1.70564e-08		SIPA1L2	1.31839	5.69859e-09	5.48959e-08		ENSSSCG00000055280	1.64681	0.00311406	0.0492932
	ZNF687	1.21965	1.88512e-09	1.73541e-08		ADM	2.01482	5.72715e-09	5.5138e-08		XLOC_155994	3.15304	0.00315663	0.0496438
	SCN3B	1.09963	1.91853e-09	1.76414e-08		POP5	1.41538	5.73477e-09	5.51782e-08	down-regulation lncRNAs	ENSSSCG00000063470	-3.24371	1.43e-09	2.54e-06
	RAPGEF3	1.74722	1.99898e-09	1.83602e-08		CARS1	1.52205	5.79694e-09	5.56786e-08		ENSSSCG00000046741	-1.6861	4.53e-09	5.39e-06
	ZER1	1.24654	2.00379e-09	1.83937e-08		PGP	1.24495	5.80545e-09	5.57246e-08		ENSSSCG00000059539	-1.34905	4.39e-09	5.39e-06
	MAST1	4.12578	2.01341e-09	1.84714e-08		TOR3A	1.50301	5.87935e-09	5.64003e-08		ENSSSCG00000045555	-1.91911	1.13e-08	1.15e-05
	FGFBP1	8.17052	2.01555e-09	1.84805e-08		B3GALT6	1.78564	5.94414e-09	5.69537e-08		XLOC_267336	-3.55407	7.37e-08	5.26e-05
	THBD	2.10288	2.0949e-09	1.91641e-08		ENSSSCG00000043288	1.58541	6.41448e-09	6.11682e-08		ENSSSCG00000063202	-1.98865	9.94e-08	6.07e-05
	AREG	2.84769	2.09713e-09	1.91736e-08		ENSSSCG00000050098	2.58462	6.65713e-09	6.34067e-08		XLOC_198898	-1.79824	1.43e-07	7.84e-05
	PPP1R15A	1.76008	2.10204e-09	1.91965e-08		MRPS24	1.09728	6.69128e-09	6.36941e-08		XLOC_203555	-1.22935	2.05e-07	0.00010457
	RNF24	1.3769	2.12239e-09	1.93714e-08		MAL2	1.32112	7.33302e-09	6.95964e-08		XLOC_251062	-1.77625	4.39e-07	0.000184564
	KCTD13	1.70751	2.18434e-09	1.98914e-08		RASL10B	2.59928	7.60912e-09	7.2004e-08		ENSSSCG00000060577	-2.44521	7.71e-07	0.000275166
	ZCCHC24	1.70259	2.21413e-09	2.01283e-08		PLK3	1.77596	7.73995e-09	7.31642e-08		XLOC_171685	-2.59216	9.34e-07	0.000317633
	ENSSSCG00000047828	1.82655	2.22541e-09	2.02194e-08		TRIM25	1.24172	7.74084e-09	7.31642e-08		XLOC_030204	-2.98086	1.19e-06	0.000387311
	SLC18A3	3.17472	2.24924e-09	2.04128e-08		CRACDL	1.80926	7.75059e-09	7.32132e-08		ENSSSCG00000032483	-1.58794	1.28e-06	0.00039369
	CDCA7	2.02202	2.2936e-09	2.08036e-08		HSPB6	1.82202	7.75876e-09	7.32473e-08		XLOC_083546	-1.76977	1.43e-06	0.000409329
	ENSSSCG00000002427	1.44719	2.32688e-09	2.10815e-08		MTA1	1.27324	7.845e-09	7.40179e-08		XLOC_273254	-1.45469	2e-06	0.00051002
	SLC6A14	2.44194	2.32584e-09	2.10815e-08		ARFGEF3	1.51682	7.98633e-09	7.5307e-08		ENSSSCG00000049683	-2.94922	2.17e-06	0.000527613
	ENSSSCG00000021591	2.05288	2.41804e-09	2.1895e-08		ENSSSCG00000047003	1.25641	8.94816e-09	8.37371e-08		ENSSSCG00000054646	-2.1938	2.58e-06	0.000593518
	NPC1	1.50861	2.48495e-09	2.24754e-08		SLC38A1	1.78225	8.9718e-09	8.39001e-08		XLOC_004568	-2.12983	3.1e-06	0.00069195
	RUVBL2	1.29244	2.56407e-09	2.31649e-08		USP20	1.36798	9.01285e-09	8.41951e-08		ENSSSCG00000063000	-1.54249	3.39e-06	0.000709042
	MAP3K14	2.49893	2.65223e-09	2.39208e-08		CARD14	1.68413	9.25136e-09	8.61725e-08		XLOC_265670	-4.97877	3.3e-06	0.000709042
	CSF2RB	1.81987	2.6973e-09	2.43137e-08		MED20	1.62589	9.2864e-09	8.64486e-08		XLOC_129911	-2.43698	3.98e-06	0.000789207
	ENSSSCG00000038418	4.96189	2.84723e-09	2.56218e-08		ENSSSCG00000038912	1.39053	9.60179e-09	8.9281e-08		ENSSSCG00000062937	-2.28461	4.93e-06	0.000901828
	HIVEP1	1.53922	2.90831e-09	2.61568e-08		DHCR24	1.43784	9.73402e-09	9.04582e-08		ENSSSCG00000050419	-1.75375	5.13e-06	0.000914707
	DGKD	1.32212	2.9612e-09	2.65728e-08		COL28A1	3.37614	9.7557e-09	9.06072e-08		ENSSSCG00000054979	-3.48097	6.7e-06	0.00106347
	PWP2	1.5051	3.0338e-09	2.71634e-08		UPK1B	2.64358	1.00041e-08	9.25929e-08		XLOC_083547	-2.39946	6.37e-06	0.00106347
	MYO1B	1.05178	3.07e-09	2.74666e-08		SELENOM	1.47324	9.99884e-09	9.25929e-08		XLOC_202349	-1.45126	7.12e-06	0.00110498
	USP42	1.34252	3.13477e-09	2.79579e-08		ENSSSCG00000046085	1.38827	1.00817e-08	9.32576e-08		ENSSSCG00000057910	-1.4193	1.03e-05	0.00144572
	C5AR2	1.91632	3.15716e-09	2.81263e-08		DDIT4L	2.17202	1.02144e-08	9.43761e-08		XLOC_270558	-1.36031	1.03e-05	0.00144572
	ENSSSCG00000016191	1.57597	3.22555e-09	2.87196e-08		ENSSSCG00000056338	2.08396	1.02413e-08	9.45702e-08		XLOC_049041	-1.98041	1.29e-05	0.00166867
	ENSSSCG00000060961	2.64396	3.26291e-09	2.90038e-08		ZNF703	1.58047	1.03677e-08	9.56818e-08		ENSSSCG00000054039	-1.08601	1.42e-05	0.00180503
	GPSM1	2.12049	3.28874e-09	2.92172e-08		INTS9	1.13694	1.04135e-08	9.60496e-08		XLOC_081399	-1.8363	1.62e-05	0.00197521
	ENSSSCG00000048309	3.6473	3.33511e-09	2.96127e-08		CYP26B1	2.22119	1.04523e-08	9.63523e-08		XLOC_153240	-2.00186	1.63e-05	0.00197521
	SHB	1.2519	3.42764e-09	3.02999e-08		MMS19	1.2259	1.05535e-08	9.70619e-08		ENSSSCG00000058224	-3.5774	1.74e-05	0.0020752
	IGFBP4	2.48186	3.42738e-09	3.02999e-08		SPAM1	2.28251	1.08459e-08	9.96937e-08		XLOC_081812	-2.15997	1.77e-05	0.00207728
	SLC35E4	2.41312	3.43628e-09	3.03427e-08		RAB5IF	1.30706	1.09565e-08	1.00596e-07		XLOC_272835	-1.33609	2.31e-05	0.00257482
	ENSSSCG00000041479	3.51292	3.49349e-09	3.08139e-08		ZBTB9	1.1292	1.10129e-08	1.00998e-07		ENSSSCG00000059201	-1.2569	2.63e-05	0.00283722
	ENSSSCG00000015645	1.57998	3.55939e-09	3.13262e-08		GAL3ST1	2.59182	1.1829e-08	1.08173e-07		ENSSSCG00000056181	-1.4565	2.74e-05	0.00284008
	BCL3	2.20525	3.71724e-09	3.259e-08		FAM83F	1.13078	1.19895e-08	1.09579e-07		XLOC_153521	-1.64179	2.75e-05	0.00284008
	CTSB	1.9079	3.72229e-09	3.25985e-08		SETD1A	1.20056	1.20362e-08	1.09942e-07		ENSSSCG00000041958	-1.21158	2.93e-05	0.00286148
	ENSSSCG00000043449	1.84259	3.76216e-09	3.29297e-08		EBP	1.4929	1.22523e-08	1.11789e-07		ENSSSCG00000052348	-1.31306	2.99e-05	0.00286148
	UBXN2B	1.09395	3.84442e-09	3.35946e-08		TUBB4B	1.52438	1.23455e-08	1.12576e-07		ENSSSCG00000057664	-2.3463	3.05e-05	0.00286148
	SPTLC3	1.63456	3.93624e-09	3.43782e-08		KCNT2	1.5697	1.2436e-08	1.13336e-07		ENSSSCG00000058037	-2.43275	3.01e-05	0.00286148
	MAP1S	1.37266	3.95398e-09	3.45083e-08		C2CD3	1.21824	1.32458e-08	1.20152e-07		ENSSSCG00000059490	-1.27843	2.84e-05	0.00286148
	DGKG	1.8409	3.95545e-09	3.45083e-08		AP1G2	1.06172	1.36198e-08	1.23354e-07		XLOC_198369	-1.51214	3.5e-05	0.00324183
	CRTC2	2.07415	4.05169e-09	3.53287e-08		PSMD3	1.15474	1.36291e-08	1.23369e-07		ENSSSCG00000048579	-4.07173	3.83e-05	0.00345735
	SPTAN1	1.23719	4.15585e-09	3.61975e-08		CTSB	1.4877	1.41286e-08	1.27674e-07		XLOC_269968	-1.83276	3.92e-05	0.00349891
	UHRF1	1.85718	4.15818e-09	3.61981e-08		TMX4	1.08185	1.41477e-08	1.27703e-07		ENSSSCG00000052265	-1.26309	4.04e-05	0.00355804
	GFPT2	3.52534	4.2022e-09	3.65615e-08		NDUFB7	1.18502	1.43433e-08	1.29324e-07		XLOC_139626	-1.66804	4.77e-05	0.00405677
	CCNJL	1.99971	4.20611e-09	3.65756e-08		GPAA1	1.13935	1.44549e-08	1.30183e-07		ENSSSCG00000049125	-1.05417	4.91e-05	0.0040603
	INTS5	1.0585	4.23e-09	3.67633e-08		RFX1	1.15147	1.48436e-08	1.3346e-07		ENSSSCG00000055478	-2.93516	4.95e-05	0.0040603
	TRIB1	1.67651	4.24439e-09	3.68581e-08		TYROBP	1.13369	1.49536e-08	1.34298e-07		XLOC_202457	-1.17365	6.13e-05	0.00481
	ARHGEF10L	1.28949	4.32791e-09	3.75328e-08		CDK2AP1	1.52666	1.52089e-08	1.36286e-07		XLOC_098307	-3.95757	6.7e-05	0.00514296
	LPIN1	2.03431	4.35114e-09	3.76934e-08		SPNS1	1.16603	1.52661e-08	1.36722e-07		XLOC_153837	-2.77686	7.24e-05	0.00533058
	KLF6	1.41941	4.35955e-09	3.77458e-08		ENSSSCG00000056336	1.12068	1.52804e-08	1.36774e-07		ENSSSCG00000051557	-3.05112	7.88e-05	0.00573926
	AGRN	1.8072	4.36443e-09	3.77676e-08		HNRNPH3	1.0965	1.58664e-08	1.41624e-07		XLOC_135265	-1.51117	8.24e-05	0.00594376
	USP36	1.51497	4.58166e-09	3.96047e-08		COA7	1.56873	1.59443e-08	1.4224e-07		ENSSSCG00000062885	-2.01593	8.34e-05	0.00595077
	RRH	2.44354	4.65274e-09	4.01974e-08		SH3PXD2A	1.08949	1.63829e-08	1.46072e-07		ENSSSCG00000051354	-1.70382	8.76e-05	0.00619194
	RAD54L	1.54131	4.73727e-09	4.08835e-08		S100A2	3.94145	1.64051e-08	1.46189e-07		XLOC_266122	-1.2159	8.86e-05	0.00620189
	KIF5C	1.7693	4.74197e-09	4.0902e-08		MTFR2	1.59684	1.67036e-08	1.48683e-07		ENSSSCG00000042551	-2.15979	9.07e-05	0.00622571
	ATP13A2	1.22288	4.75224e-09	4.09686e-08		SOD3	2.57554	1.6736e-08	1.48806e-07		ENSSSCG00000047310	-2.47792	9.83e-05	0.00658396
	RPS6KA1	1.33704	4.84882e-09	4.17072e-08		KPNB1	1.13894	1.72811e-08	1.53145e-07		ENSSSCG00000051151	-1.27535	0.000106505	0.00699796
	MLF2	1.18099	4.86935e-09	4.1843e-08		UAP1	1.1417	1.73311e-08	1.53503e-07		XLOC_157230	-1.09997	0.000110166	0.00700598
	DIO3	5.17195	4.91985e-09	4.21638e-08		RPL28	1.37551	1.73498e-08	1.53583e-07		XLOC_201942	-1.52103	0.000113493	0.00700598
	ENSSSCG00000052785	1.77445	4.93663e-09	4.22819e-08		QTRT1	1.50267	1.75954e-08	1.5533e-07		XLOC_059121	-1.48238	0.000118765	0.00718527
	CAPN2	1.9765	4.95842e-09	4.24262e-08		ENSSSCG00000061074	1.82712	1.86453e-08	1.64056e-07		XLOC_220621	-1.81779	0.000143767	0.00801837
	DYNC1I1	2.56566	5.01446e-09	4.28599e-08		DAPK1	1.01191	1.97885e-08	1.73639e-07		ENSSSCG00000050000	-2.06702	0.000156273	0.00864831
	KLF2	2.26233	5.15439e-09	4.3962e-08		ACACA	1.02745	2.07264e-08	1.8167e-07		XLOC_236068	-1.65333	0.000158668	0.0087133
	ACVR1B	1.49414	5.18181e-09	4.41488e-08		ENSSSCG00000049181	1.18508	2.0976e-08	1.83658e-07		ENSSSCG00000059158	-3.08161	0.000163933	0.00886603
	PTCH2	2.12662	5.254e-09	4.47401e-08		TCIRG1	1.15716	2.12574e-08	1.85918e-07		XLOC_005140	-1.61375	0.00017097	0.00917712
	ENSSSCG00000048073	2.38619	5.26337e-09	4.4796e-08		PER1	2.37758	2.29839e-08	2.00363e-07		XLOC_171676	-2.57679	0.00018412	0.00980922
	SYT6	3.05638	5.47158e-09	4.64939e-08		ZER1	1.21174	2.32033e-08	2.02166e-07		ENSSSCG00000043202	-3.1709	0.000187507	0.00990206
	ENSSSCG00000055459	2.35809	5.49031e-09	4.66283e-08		PCDH8	4.29483	2.3225e-08	2.02245e-07		ENSSSCG00000055986	-1.22714	0.000189903	0.00990206
	ERN1	1.5195	5.57416e-09	4.72903e-08		AMT	1.52621	2.40078e-08	2.08609e-07		XLOC_185213	-1.6503	0.000190024	0.00990206
	ACSS2	1.81483	5.64957e-09	4.78287e-08		LSR	1.52067	2.45088e-08	2.12617e-07		XLOC_136577	-2.77853	0.000196977	0.0101529
	NOTCH1	1.62904	5.72233e-09	4.8419e-08		CLSTN1	1.01861	2.47896e-08	2.14888e-07		XLOC_047657	-2.73871	0.000205838	0.0104218
	H2BC21	3.11752	5.75043e-09	4.86311e-08		NRIP3	2.46266	2.48242e-08	2.14888e-07		XLOC_235054	-2.93919	0.000205564	0.0104218
	ENSSSCG00000024330	2.43568	5.7625e-09	4.87075e-08		ENSSSCG00000040632	1.19049	2.48171e-08	2.14888e-07		XLOC_200565	-1.74795	0.000230652	0.0112783
	GBA1	1.22871	5.81946e-09	4.9137e-08		CLPB	1.24999	2.48888e-08	2.15332e-07		XLOC_136752	-1.56246	0.000257352	0.0123304
	NCOR2	1.49325	5.83554e-09	4.92468e-08		CCDC86	1.68938	2.55844e-08	2.20755e-07		ENSSSCG00000045043	-1.39133	0.000259433	0.0123473
	EPHB2	2.33381	5.93955e-09	5.00454e-08		EARS2	1.11132	2.57205e-08	2.21791e-07		ENSSSCG00000042921	-1.11857	0.000267523	0.0126422
	VWA7	2.46489	5.97428e-09	5.02617e-08		CBLN2	1.82999	2.60191e-08	2.23904e-07		XLOC_098994	-1.54242	0.000289111	0.0133699
	RNF39	4.35016	6.23971e-09	5.23266e-08		NOM1	1.1139	2.61834e-08	2.25197e-07		XLOC_173588	-2.27849	0.000291181	0.0133699
	ENSSSCG00000044253	2.07863	6.23688e-09	5.23266e-08		IL22	3.45658	2.63083e-08	2.25984e-07		XLOC_171623	-1.7535	0.000294267	0.0133807
	ALG12	1.17004	6.37751e-09	5.33704e-08		MRPL57	1.08553	2.68391e-08	2.30219e-07		XLOC_080473	-1.82792	0.000301862	0.0135534
	ENSSSCG00000056885	1.98251	6.47136e-09	5.40992e-08		NKAIN1	2.95434	2.69387e-08	2.3095e-07		ENSSSCG00000054537	-1.18266	0.000305579	0.0136346
	GLI3	1.43685	6.53476e-09	5.46007e-08		SLC25A39	1.11671	2.71054e-08	2.32255e-07		ENSSSCG00000054804	-3.04085	0.000318858	0.0140514
	EPS8	1.27625	6.657e-09	5.55351e-08		PGS1	1.03765	2.75273e-08	2.35619e-07		XLOC_082191	-1.46406	0.000352238	0.0153091
	EXTL3	1.08283	6.68412e-09	5.56753e-08		SOX9	1.96077	2.91679e-08	2.48733e-07		ENSSSCG00000048215	-1.29975	0.000384665	0.0161685
	STXBP1	1.61054	6.71841e-09	5.59018e-08		DUS1L	1.56141	2.93438e-08	2.49968e-07		XLOC_098143	-3.65137	0.000383726	0.0161685
	KDM4B	1.30779	6.75552e-09	5.61522e-08		INCENP	1.43087	2.94419e-08	2.5067e-07		XLOC_153360	-2.85813	0.000392986	0.0162204
	RELL1	1.07865	7.15112e-09	5.92865e-08		ENSSSCG00000041300	2.1229	2.95682e-08	2.51612e-07		XLOC_236675	-1.05774	0.000390076	0.0162204
	PRKX	1.5976	7.20878e-09	5.9641e-08		COX10	1.23117	2.97589e-08	2.53026e-07		XLOC_199913	-1.3839	0.000414746	0.0168152
	RTN1	1.72082	7.23112e-09	5.97949e-08		GTF2H4	1.02836	2.97659e-08	2.53026e-07		ENSSSCG00000060736	-1.79234	0.000428798	0.0171016
	PDGFRB	1.62373	7.36706e-09	6.08876e-08		NAPA	1.11209	3.0051e-08	2.55314e-07		XLOC_252178	-2.11672	0.000427175	0.0171016
	CDHR4	3.10111	7.56015e-09	6.23547e-08		MARS1	1.21446	3.0972e-08	2.63e-07		ENSSSCG00000047648	-1.89313	0.000447075	0.0174408
	ZFYVE28	2.44612	7.90395e-09	6.50562e-08		PPP2R5D	2.09723	3.14779e-08	2.67013e-07		XLOC_235763	-1.78635	0.000451826	0.0174495
	POLA2	1.28589	8.16703e-09	6.7118e-08		WDR18	1.18424	3.21385e-08	2.72185e-07		ENSSSCG00000049199	-1.60399	0.000467441	0.0179412
	GLI2	1.83398	8.19801e-09	6.73381e-08		DAB2IP	1.09456	3.26761e-08	2.76592e-07		XLOC_129330	-1.4386	0.000486022	0.0184559
	NOP9	1.26558	8.25199e-09	6.77467e-08		BEND3	1.24163	3.27072e-08	2.7671e-07		XLOC_172596	-4.23235	0.000490374	0.0184611
	ENSSSCG00000015401	1.6013	8.4058e-09	6.89254e-08		GALNT6	1.57626	3.3476e-08	2.82693e-07		ENSSSCG00000055571	-1.59778	0.000495876	0.0185343
	SYVN1	1.26081	8.40848e-09	6.89254e-08		C1S	1.41452	3.37031e-08	2.84087e-07		ENSSSCG00000062828	-1.11488	0.000509746	0.018586
	NCAPD2	1.3986	8.53797e-09	6.99153e-08		LARGE2	1.69654	3.5808e-08	3.00881e-07		XLOC_155971	-1.30124	0.000511705	0.018586
	NBEA	1.6386	8.80905e-09	7.19144e-08		PELI2	1.55051	3.61826e-08	3.03316e-07		ENSSSCG00000050295	-2.10918	0.000537235	0.0192264
	DMWD	1.06646	8.82168e-09	7.19808e-08		ENSSSCG00000056043	1.9493	3.61923e-08	3.03316e-07		ENSSSCG00000050256	-1.77418	0.000561983	0.0195707
	PKD1	1.76	8.87262e-09	7.23227e-08		SEC31B	1.12928	3.66475e-08	3.06651e-07		ENSSSCG00000051809	-1.45326	0.000561362	0.0195707
	SFMBT2	2.28078	8.88697e-09	7.24028e-08		FAM117B	2.04734	3.66395e-08	3.06651e-07		ENSSSCG00000057488	-1.41207	0.000582504	0.0200686
	ENSSSCG00000038182	2.3935	8.90717e-09	7.25305e-08		ENSSSCG00000014242	1.36182	3.68381e-08	3.08084e-07		XLOC_049378	-1.68821	0.000584712	0.0200686
	CLSTN1	1.19788	9.01017e-09	7.33319e-08		AMBRA1	1.05063	3.76802e-08	3.14963e-07		XLOC_201584	-1.05673	0.000598122	0.0203333
	PCSK6	1.85027	9.23976e-09	7.51241e-08		CRAMP1	1.0526	3.81336e-08	3.18587e-07		XLOC_099777	-2.01954	0.000633261	0.0210438
	ENSSSCG00000047223	2.03739	9.37119e-09	7.61154e-08		NIP7	1.41516	4.0125e-08	3.3418e-07		XLOC_139253	-2.64562	0.000630001	0.0210438
	PEAR1	1.33702	9.54846e-09	7.75158e-08		SHQ1	1.17025	4.0246e-08	3.35014e-07		XLOC_031257	-1.36336	0.000653855	0.0212778
	ZNF467	2.41344	9.62117e-09	7.79875e-08		ABHD12	1.16053	4.0704e-08	3.38476e-07		ENSSSCG00000060465	-1.28715	0.000697346	0.0221797
	DDX39B	1.41113	9.80903e-09	7.94298e-08		ENSSSCG00000044786	2.27727	4.10896e-08	3.41152e-07		XLOC_220730	-3.79762	0.00069485	0.0221797
	PDLIM7	1.39143	9.84124e-09	7.96504e-08		CKS1B	1.32894	4.23124e-08	3.5076e-07		XLOC_098126	-1.42091	0.000733327	0.0227136
	SPTSSA	1.11946	9.93629e-09	8.02979e-08		ATP6AP1	1.28688	4.24785e-08	3.51955e-07		XLOC_199534	-1.0033	0.000751002	0.0229197
	CNTFR	2.51008	1.01022e-08	8.14331e-08		ENSSSCG00000048333	1.46294	4.31898e-08	3.57295e-07		ENSSSCG00000056845	-1.04922	0.000783036	0.0236164
	POLE	1.53866	1.02707e-08	8.27083e-08		RIPOR1	1.03833	4.32582e-08	3.57493e-07		ENSSSCG00000044582	-2.02102	0.000791374	0.0237379
	SCAP	1.01806	1.04019e-08	8.37223e-08		GBA1	1.35521	4.33945e-08	3.58435e-07		XLOC_137746	-1.56582	0.0008053	0.0240546
	ENSSSCG00000045711	2.1571	1.05727e-08	8.50547e-08		COX18	1.21808	4.39779e-08	3.62693e-07		ENSSSCG00000042151	-1.4204	0.000816688	0.0242931
	CELF3	2.46538	1.06259e-08	8.54398e-08		ALG3	1.41142	4.40899e-08	3.63431e-07		XLOC_198916	-1.17367	0.000881423	0.0256836
	JUP	1.88185	1.09073e-08	8.75701e-08		THAP4	1.21548	4.48602e-08	3.6959e-07		XLOC_171180	-1.16671	0.00089274	0.0259076
	ANGPTL3	1.55088	1.1006e-08	8.83182e-08		USP36	1.46179	4.56883e-08	3.7622e-07		ENSSSCG00000057646	-2.45664	0.000926075	0.026445
	ENSSSCG00000059210	2.80637	1.12519e-08	9.02013e-08		ENSSSCG00000059426	2.15801	4.66758e-08	3.83564e-07		XLOC_083549	-1.41741	0.000941636	0.0267822
	MMS19	1.29403	1.13233e-08	9.0728e-08		MAP3K3	1.30217	4.74673e-08	3.89868e-07		XLOC_006123	-3.10379	0.000954078	0.0269216
	HNRNPL	1.17981	1.13731e-08	9.10815e-08		ENSSSCG00000041978	1.87649	4.84748e-08	3.97533e-07		XLOC_270216	-1.37536	0.00095103	0.0269216
	USP20	1.66332	1.19034e-08	9.51381e-08		ENSSSCG00000045084	1.735	4.91144e-08	4.02573e-07		ENSSSCG00000055150	-1.8144	0.000974033	0.0272691
	SLC9A5	2.72995	1.20989e-08	9.66045e-08		CCNA2	1.45495	5.02288e-08	4.10658e-07		XLOC_267470	-1.733	0.000970986	0.0272691
	VANGL2	2.18872	1.21675e-08	9.71037e-08		LAMC2	1.10589	5.07254e-08	4.14507e-07		XLOC_031258	-1.07828	0.00100457	0.0277969
	ENSSSCG00000041185	4.55406	1.23284e-08	9.82404e-08		JADE2	1.27939	5.15531e-08	4.21056e-07		XLOC_080742	-2.5954	0.00100858	0.0278001
	EPHA5	1.55825	1.24609e-08	9.92467e-08		CLDN4	2.06788	5.32426e-08	4.34192e-07		ENSSSCG00000044588	-1.28522	0.0010438	0.0279086
	ASH2L	1.37195	1.25507e-08	9.99126e-08		PDLIM7	1.44166	5.45423e-08	4.43889e-07		ENSSSCG00000053718	-1.25893	0.001042	0.0279086
	ENSSSCG00000041656	1.83544	1.26925e-08	1.00991e-07		VWCE	4.56935	5.46634e-08	4.44649e-07		ENSSSCG00000057978	-1.42994	0.00105161	0.0279086
	SEMA4C	1.79595	1.27933e-08	1.01692e-07		DUSP2	2.2132	5.58051e-08	4.53247e-07		XLOC_047524	-1.90928	0.00104957	0.0279086
	HRH2	2.71607	1.28593e-08	1.02115e-07		ENSSSCG00000049503	1.55989	5.63938e-08	4.57797e-07		XLOC_083168	-3.44206	0.00103203	0.0279086
	KHSRP	1.35014	1.29693e-08	1.02937e-07		REC8	1.89492	5.67375e-08	4.60121e-07		XLOC_250051	-2.27959	0.00102455	0.0279086
	SLC25A25	2.12162	1.30844e-08	1.03749e-07		MMP8	3.65879	5.67233e-08	4.60121e-07		XLOC_219196	-1.6955	0.00106282	0.0281018
	HIVEP2	1.37347	1.3465e-08	1.06608e-07		YBX3	1.00374	5.89641e-08	4.77214e-07		ENSSSCG00000057224	-1.32473	0.00112417	0.0293973
	ENSSSCG00000000703	2.22463	1.36942e-08	1.08315e-07		ENSSSCG00000050495	4.62666	5.95298e-08	4.81064e-07		ENSSSCG00000051936	-2.20363	0.00112996	0.0294408
	STX16	1.34518	1.37081e-08	1.08372e-07		DCAF15	1.21558	6.06988e-08	4.88971e-07		XLOC_200480	-1.08058	0.00116602	0.029836
	ENSSSCG00000045366	3.09971	1.37269e-08	1.08467e-07		PRELP	1.38026	6.06575e-08	4.88971e-07		ENSSSCG00000044256	-1.32787	0.00122511	0.030474
	RABGGTA	1.68759	1.37476e-08	1.08562e-07		ZNF618	1.74931	6.12726e-08	4.92667e-07		ENSSSCG00000056253	-1.51436	0.00122271	0.030474
	UBAP2L	1.09915	1.37525e-08	1.08562e-07		ENSSSCG00000046388	2.69632	6.27391e-08	5.03954e-07		ENSSSCG00000051300	-1.53448	0.00124719	0.0305925
	CNTNAP5	1.84828	1.40607e-08	1.10831e-07		ENSSSCG00000063153	4.77916	6.284e-08	5.04512e-07		ENSSSCG00000059103	-1.19432	0.0012513	0.0305925
	FAM222B	1.3937	1.4518e-08	1.14267e-07		PDCD2L	1.616	6.48026e-08	5.19748e-07		XLOC_154121	-1.40111	0.00124068	0.0305925
	B3GALT6	1.71243	1.4576e-08	1.14644e-07		CRTC1	1.24076	6.69128e-08	5.34803e-07		XLOC_000151	-2.53896	0.00125585	0.030599
	DHX16	1.1692	1.48809e-08	1.16736e-07		IRS1	1.94003	6.9594e-08	5.55678e-07		ENSSSCG00000062692	-1.99495	0.00133111	0.0318308
	SF3A2	1.5256	1.48996e-08	1.16811e-07		TMEM223	1.4756	7.09866e-08	5.65985e-07		XLOC_099694	-3.18666	0.00134207	0.0318308
	TRMT44	1.62866	1.4992e-08	1.17478e-07		ENSSSCG00000037620	3.69461	7.11332e-08	5.66841e-07		XLOC_197636	-2.62161	0.0013302	0.0318308
	OTUD7A	1.76004	1.50344e-08	1.17695e-07		E2F8	1.36712	7.13298e-08	5.68125e-07		ENSSSCG00000057066	-1.0284	0.00135226	0.0318606
	ENSSSCG00000046437	4.00086	1.50577e-08	1.17819e-07		DISP3	4.97386	7.26688e-08	5.78216e-07		XLOC_169809	-2.76677	0.00142288	0.0327674
	KIRREL1	1.4598	1.52242e-08	1.19064e-07		SPRY3	1.60416	7.44522e-08	5.91526e-07		XLOC_171674	-1.2029	0.00142208	0.0327674
	SOD3	2.68172	1.52916e-08	1.19533e-07		KLF4	1.09846	7.48055e-08	5.93745e-07		XLOC_198884	-2.54244	0.001419	0.0327674
	PCNX3	1.31073	1.54868e-08	1.20941e-07		RPIA	1.28781	7.76555e-08	6.14846e-07		ENSSSCG00000054443	-1.01585	0.0014313	0.0328555
	ABCB8	1.50031	1.56624e-08	1.22253e-07		SLC2A4	1.90852	7.77283e-08	6.15119e-07		ENSSSCG00000044003	-1.27193	0.00145523	0.0331048
	SSBP4	1.19933	1.64384e-08	1.28122e-07		ENSSSCG00000053150	2.29579	8.15297e-08	6.42667e-07		ENSSSCG00000054331	-1.65629	0.00149893	0.0332231
	ADAM8	3.21986	1.64929e-08	1.28484e-07		HDAC4	1.45186	8.35185e-08	6.57053e-07		XLOC_156282	-3.28733	0.00152395	0.0333726
	CTPS1	1.22434	1.67976e-08	1.30667e-07		FABP3	2.24679	8.65149e-08	6.7863e-07		XLOC_155859	-1.26528	0.00155803	0.0338079
	ENSSSCG00000004387	1.37102	1.73018e-08	1.34394e-07		NOA1	1.13524	8.70754e-08	6.82693e-07		XLOC_098466	-1.53008	0.00156594	0.0338766
	ENSSSCG00000007719	1.74725	1.7525e-08	1.35929e-07		CTPS1	1.1698	9.1167e-08	7.13031e-07		ENSSSCG00000058614	-1.3397	0.0015807	0.0340926
	S100Z	2.98845	1.76346e-08	1.36647e-07		CRHR1	5.05848	9.12969e-08	7.13699e-07		XLOC_097664	-1.7755	0.00158646	0.0341136
	SLC45A4	1.65282	1.77386e-08	1.3732e-07		SYNGAP1	1.74857	9.19801e-08	7.17874e-07		ENSSSCG00000058553	-1.43969	0.00160671	0.0343422
	SPRED2	1.34543	1.77475e-08	1.37323e-07		ABHD8	1.3912	9.20099e-08	7.17874e-07		XLOC_156292	-1.85121	0.00163454	0.0347291
	PDE4B	2.30494	1.80607e-08	1.39476e-07		EPM2AIP1	1.25672	9.56197e-08	7.44952e-07		ENSSSCG00000050213	-1.55289	0.00171436	0.0361027
	EIF3B	1.52813	1.80888e-08	1.39626e-07		USB1	1.255	9.62712e-08	7.49663e-07		ENSSSCG00000055222	-2.63995	0.00176964	0.0367006
	RHBDF1	1.44767	1.8707e-08	1.43912e-07		MAP1S	1.18226	9.86172e-08	7.66445e-07		XLOC_155929	-3.34733	0.00176693	0.0367006
	GNL1	1.0843	1.90227e-08	1.4613e-07		TSPAN1	1.85045	9.96715e-08	7.73514e-07		ENSSSCG00000052460	-1.13183	0.00179416	0.0370187
	PRDM8	3.19463	1.90951e-08	1.46615e-07		ENSSSCG00000047850	1.05777	1.00157e-07	7.76903e-07		ENSSSCG00000054931	-1.51678	0.00180113	0.0370555
	SLC25A35	2.81321	1.96514e-08	1.5067e-07		SLC45A4	1.30367	1.01618e-07	7.87482e-07		XLOC_154625	-2.34826	0.00181767	0.0372883
	ENSSSCG00000049034	1.45491	1.97755e-08	1.51549e-07		TAF6	1.07562	1.02308e-07	7.92057e-07		XLOC_186340	-3.57019	0.00186169	0.0374382
	ENSSSCG00000041364	3.84375	2.00088e-08	1.53117e-07		CACNA1H	1.46273	1.02502e-07	7.93179e-07		XLOC_236540	-1.45537	0.00187201	0.0374731
	COL28A1	2.86201	2.02286e-08	1.54651e-07		TCOF1	1.63234	1.02698e-07	7.94314e-07		ENSSSCG00000056800	-1.26327	0.00189017	0.0376925
	JAKMIP3	3.63758	2.06446e-08	1.57756e-07		CX3CL1	2.66308	1.06709e-07	8.24048e-07		ENSSSCG00000046612	-1.76122	0.00193157	0.0380924
	TBL3	1.33191	2.06645e-08	1.57833e-07		RAB3B	1.37432	1.10867e-07	8.53793e-07		ENSSSCG00000054758	-1.133	0.00195336	0.038329
	SMARCD1	1.13566	2.07705e-08	1.58567e-07		FDXR	1.01543	1.1832e-07	9.0597e-07		ENSSSCG00000036144	-1.65441	0.00200095	0.0384
	ZNF628	2.21664	2.12768e-08	1.62355e-07		OTUD7A	1.61925	1.18977e-07	9.09271e-07		XLOC_197554	-1.84482	0.00213706	0.0400432
	KAT2A	1.26324	2.16273e-08	1.64872e-07		ASMTL	1.18066	1.19521e-07	9.1247e-07		ENSSSCG00000045404	-1.052	0.00216134	0.0402867
	LAMA5	1.73694	2.16384e-08	1.64878e-07		HAPLN3	2.15498	1.20821e-07	9.21607e-07		ENSSSCG00000051194	-1.45978	0.00225397	0.041579
	RPIA	1.3729	2.22163e-08	1.69121e-07		TUG1	1.29254	1.21505e-07	9.25943e-07		XLOC_079587	-1.60479	0.00228774	0.0420933
	RAB3B	1.37918	2.22847e-08	1.6956e-07		ID3	1.054	1.21674e-07	9.26787e-07		ENSSSCG00000055760	-1.79507	0.00237416	0.0427072
	H2AC19	2.73975	2.23303e-08	1.69827e-07		XRRA1	1.4079	1.27689e-07	9.70764e-07		XLOC_265905	-1.19142	0.002393	0.042816
	BSN	2.47544	2.24461e-08	1.70545e-07		ENSSSCG00000044501	3.00106	1.28268e-07	9.74706e-07		XLOC_234618	-1.07096	0.00244155	0.0433588
	RBPMS	1.37416	2.27328e-08	1.7256e-07		RAD54L	1.47318	1.28925e-07	9.79232e-07		ENSSSCG00000046498	-1.55968	0.0024479	0.0433636
	SMOC1	1.88765	2.29034e-08	1.73701e-07		TMEM161A	1.15139	1.36969e-07	1.03787e-06		ENSSSCG00000057327	-1.01431	0.00253883	0.0440991
	ARHGEF7	1.09394	2.29047e-08	1.73701e-07		PPAT	1.27884	1.39581e-07	1.05689e-06		XLOC_048893	-1.18174	0.00257388	0.0444913
	HSF1	1.33061	2.30885e-08	1.74929e-07		C5AR2	1.26757	1.46449e-07	1.10501e-06		ENSSSCG00000061655	-1.25363	0.00264947	0.0450657
	ESYT2	1.13548	2.33836e-08	1.7708e-07		ENSSSCG00000060759	2.6025	1.47627e-07	1.11337e-06		XLOC_136684	-1.19935	0.00264175	0.0450657
	SLCO1A2	3.20727	2.34317e-08	1.77361e-07		PRMT1	1.2982	1.48166e-07	1.11692e-06		XLOC_197646	-2.47801	0.00266392	0.0450657
	MSS51	1.54062	2.36535e-08	1.78786e-07		ENSSSCG00000031800	2.04088	1.52912e-07	1.14945e-06		ENSSSCG00000043056	-1.76928	0.00273807	0.0459036
	TGFBR3	1.77941	2.4082e-08	1.81853e-07		ZNF316	1.25602	1.53942e-07	1.15503e-06		XLOC_203499	-1.63384	0.00275011	0.0459791
	ENSSSCG00000044501	2.9894	2.41183e-08	1.82042e-07		SLC25A24	1.52132	1.62038e-07	1.21351e-06		XLOC_005532	-1.69066	0.00280039	0.0463852
	ENSSSCG00000058191	2.40629	2.44642e-08	1.84565e-07		SSBP4	1.04848	1.62307e-07	1.21496e-06		ENSSSCG00000054060	-2.97495	0.00284549	0.0469145
	SEZ6L	1.76243	2.52741e-08	1.90317e-07		IPO4	1.18315	1.64994e-07	1.23392e-06		ENSSSCG00000052512	-1.82495	0.00293722	0.0480328
	ZNF219	1.37987	2.55703e-08	1.92457e-07		ADAMTS1	1.18979	1.67513e-07	1.25159e-06		ENSSSCG00000055095	-1.2598	0.00294024	0.0480328
	SLC9A1	1.63623	2.56451e-08	1.92929e-07		ENSSSCG00000048076	2.3388	1.71125e-07	1.27561e-06		ENSSSCG00000052769	-1.7508	0.00301616	0.0484921
	CD44	1.71284	2.59787e-08	1.95164e-07		LSS	1.34915	1.7197e-07	1.28131e-06		XLOC_155698	-1.20612	0.00303472	0.0485759
	ENSSSCG00000043146	1.99714	2.59768e-08	1.95164e-07		FAM20C	1.91966	1.7205e-07	1.28131e-06		ENSSSCG00000054768	-1.18599	0.00308448	0.049152
	PHOX2B	1.80467	2.62365e-08	1.96915e-07		NFKBIB	1.63025	1.72437e-07	1.2836e-06		XLOC_006710	-1.95665	0.00309293	0.0491769
	WDR6	1.31956	2.67731e-08	2.00566e-07		RNPEPL1	1.11623	1.78467e-07	1.32358e-06		ENSSSCG00000047753	-1.5107	0.00312838	0.0494105
	RELCH	1.0339	2.68031e-08	2.00698e-07		ENSSSCG00000049471	1.57176	1.79271e-07	1.32893e-06		XLOC_083272	-1.1773	0.0031575	0.0496438
	SMPD4	1.52403	2.69291e-08	2.01377e-07		ZDHHC14	1.33758	1.81725e-07	1.34649e-06		XLOC_157536	-1.46072	0.00316402	0.0496438
	ENSSSCG00000032202	1.58816	2.69316e-08	2.01377e-07		PMP22	1.94153	1.8855e-07	1.39449e-06	up-regulation miRNAs	ssc-miR-144	3.38879	2.59431e-06	0.00214809
	RCC2	1.17705	2.70638e-08	2.02177e-07		STARD5	1.53198	1.92768e-07	1.42306e-06		18_43800	1.94361	1.31634e-05	0.00544964
	CRAMP1	1.43356	2.75925e-08	2.0603e-07		BCL6	1.40242	1.92862e-07	1.4231e-06		1_3042	2.76916	2.89242e-05	0.00798309
	ENSSSCG00000043818	2.82371	2.78123e-08	2.07575e-07		METTL26	1.40487	1.99064e-07	1.46751e-06
	GPR84	3.44966	2.79261e-08	2.08327e-07		SNRPA	1.48628	2.00874e-07	1.47882e-06
	UPB1	3.05234	2.80117e-08	2.08868e-07		SLC15A4	1.07852	2.00796e-07	1.47882e-06
	ENSSSCG00000059247	2.93259	2.86001e-08	2.12957e-07		ENSSSCG00000042520	1.40382	2.01316e-07	1.48072e-06
	RNPEPL1	1.18951	2.86146e-08	2.12967e-07		C4BPB	2.36492	2.01646e-07	1.48246e-06
	CATSPERB	3.70532	2.89638e-08	2.15175e-07		TTC7A	1.13654	2.03584e-07	1.49534e-06
	ASB1	1.16762	2.90927e-08	2.16023e-07		CD37	2.00377	2.08386e-07	1.52851e-06
	TRRAP	1.36703	2.92546e-08	2.17024e-07		ENSSSCG00000046222	1.7548	2.10107e-07	1.54043e-06
	MBOAT1	1.15523	2.94577e-08	2.18192e-07		AP1S3	1.52543	2.11823e-07	1.5516e-06
	FBXL6	1.51619	2.94551e-08	2.18192e-07		PPP1R35	1.3911	2.14161e-07	1.56801e-06
	ENSSSCG00000005596	1.5185	3.05379e-08	2.25707e-07		ENSSSCG00000033037	1.14192	2.225e-07	1.62461e-06
	SAMHD1	1.42577	3.06464e-08	2.26404e-07		NUP85	1.14084	2.22774e-07	1.62587e-06
	ZDHHC14	1.39736	3.0703e-08	2.26718e-07		TROAP	1.96727	2.25252e-07	1.64172e-06
	ENSSSCG00000048260	2.0309	3.10795e-08	2.29286e-07		UVSSA	1.18825	2.26424e-07	1.64952e-06
	FADS2	1.33821	3.19147e-08	2.35015e-07		TSSK4	1.70474	2.27075e-07	1.65351e-06
	CSRNP1	2.27099	3.1994e-08	2.35382e-07		CHST14	1.42468	2.2882e-07	1.6647e-06
	ENSSSCG00000044600	3.91671	3.36891e-08	2.47512e-07		ADAMTS4	1.41321	2.30738e-07	1.67714e-06
	HS3ST1	1.23464	3.37512e-08	2.47855e-07		ADCK1	1.08175	2.46627e-07	1.78892e-06
	SENP3	1.37242	3.4022e-08	2.49728e-07		ENSSSCG00000044064	2.04049	2.46675e-07	1.78892e-06
	DCLK2	1.2135	3.42837e-08	2.51419e-07		MLXIPL	2.15651	2.50926e-07	1.81729e-06
	GLRB	2.09818	3.45918e-08	2.53562e-07		SPHK2	1.09544	2.58909e-07	1.87257e-06
	KIAA1549	2.02113	3.59587e-08	2.6298e-07		AURKB	1.55496	2.62554e-07	1.89551e-06
	ENSSSCG00000032951	2.12537	3.75797e-08	2.74333e-07		RAE1	1.13109	2.66778e-07	1.91976e-06
	TUBGCP3	1.12291	3.8815e-08	2.82707e-07		ENSSSCG00000052785	1.2777	2.69635e-07	1.93705e-06
	P2RY4	3.62311	3.88053e-08	2.82707e-07		ENSSSCG00000045808	1.20075	2.72618e-07	1.95673e-06
	ANKRD33B	2.29412	3.94993e-08	2.8756e-07		P2RY4	4.57792	2.73612e-07	1.96299e-06
	NPPB	8.00129	3.97145e-08	2.88995e-07		NOL6	1.156	2.77658e-07	1.98935e-06
	DAG1	1.03339	3.97483e-08	2.8911e-07		SKA3	1.16797	2.92986e-07	2.09356e-06
	BICRA	2.28465	4.13956e-08	3.00273e-07		SEC61A1	1.02741	2.99079e-07	2.13519e-06
	RGMA	1.72402	4.2062e-08	3.04831e-07		ENSSSCG00000057276	1.90184	3.02176e-07	2.15539e-06
	SERPIND1	2.83569	4.23938e-08	3.06957e-07		ENSSSCG00000040993	3.7499	3.05104e-07	2.17338e-06
	FLVCR2	2.30692	4.26989e-08	3.08887e-07		SGPP2	1.18774	3.127e-07	2.22255e-06
	PKP2	1.38412	4.44082e-08	3.20383e-07		ENSSSCG00000047713	1.41754	3.18209e-07	2.25672e-06
	ADCYAP1R1	2.84059	4.49666e-08	3.23974e-07		ENSSSCG00000032894	1.47038	3.21709e-07	2.27751e-06
	SSRP1	1.23106	4.49976e-08	3.24052e-07		REPIN1	1.05201	3.25371e-07	2.29836e-06
	DNM2	1.22969	4.50708e-08	3.24432e-07		VWA7	2.35583	3.33408e-07	2.34997e-06
	XRCC3	1.90399	4.76085e-08	3.42085e-07		FEN1	1.18431	3.36189e-07	2.36852e-06
	PTPRN2	1.61175	4.76652e-08	3.42339e-07		ENSSSCG00000039972	1.14633	3.36702e-07	2.3711e-06
	PRRC2B	1.42349	4.77076e-08	3.42489e-07		ENSSSCG00000003177	1.59469	3.45699e-07	2.42806e-06
	CXCL9	2.33459	4.85907e-08	3.48672e-07		NPTXR	2.09178	3.49696e-07	2.45292e-06
	ENSSSCG00000033451	2.29668	4.90284e-08	3.51498e-07		ENSSSCG00000051626	1.49895	3.71099e-07	2.5951e-06
	CDA	3.18331	4.92336e-08	3.52811e-07		IL1RAP	1.33634	3.72721e-07	2.60305e-06
	ENSSSCG00000041080	2.2055	4.93308e-08	3.5335e-07		HDHD5	1.32018	3.75053e-07	2.61819e-06
	NSUN3	1.06473	5.0924e-08	3.63948e-07		ATP1A3	2.42304	3.83095e-07	2.66853e-06
	HDHD5	1.40583	5.21103e-08	3.71927e-07		SCN5A	2.10057	3.84799e-07	2.67923e-06
	ENSSSCG00000050812	2.85947	5.21083e-08	3.71927e-07		KLF2	1.58011	3.85302e-07	2.68157e-06
	PKP1	4.90599	5.23155e-08	3.73226e-07		METTL24	1.58319	3.89508e-07	2.70967e-06
	ARHGEF11	1.20675	5.34008e-08	3.80799e-07		MTERF4	1.13424	4.10801e-07	2.84916e-06
	GAL	3.59464	5.34581e-08	3.81038e-07		ENSSSCG00000039761	1.68042	4.23353e-07	2.93115e-06
	BCAR1	1.03154	5.37666e-08	3.82895e-07		ENSSSCG00000045711	1.89017	4.24672e-07	2.93901e-06
	AGR2	1.92711	5.45853e-08	3.87691e-07		SERPING1	1.10697	4.25477e-07	2.94331e-06
	RASGEF1C	2.69793	5.48324e-08	3.89101e-07		PAQR5	1.87553	4.30266e-07	2.97516e-06
	CRISPLD2	2.29911	5.59627e-08	3.96594e-07		TMEM252	3.73567	4.42787e-07	3.05647e-06
	ENSSSCG00000046085	1.76514	5.64393e-08	3.99795e-07		ORC6	1.39855	4.51161e-07	3.10888e-06
	HASPIN	1.91531	5.87688e-08	4.15011e-07		IRS2	1.46171	4.51154e-07	3.10888e-06
	ENSSSCG00000056430	1.51809	5.92028e-08	4.17891e-07		CRTC2	1.45259	4.7081e-07	3.2346e-06
	ENSSSCG00000050791	2.48087	5.97335e-08	4.2108e-07		PIP4P1	1.38322	4.74092e-07	3.25297e-06
	ZMIZ2	1.41337	6.02849e-08	4.24594e-07		SFXN2	1.19525	4.79427e-07	3.28537e-06
	ENSSSCG00000003476	3.74017	6.19335e-08	4.35438e-07		ZBTB49	1.26808	4.80715e-07	3.29278e-06
	ITGA10	1.60842	6.27897e-08	4.41082e-07		GALNT15	2.13038	4.90512e-07	3.35416e-06
	ENSSSCG00000044894	1.87944	6.27914e-08	4.41082e-07		RIPK3	1.32232	4.93063e-07	3.37017e-06
	ACAT2	2.58425	6.29554e-08	4.42041e-07		CELSR3	1.68461	4.98323e-07	3.40323e-06
	ENSSSCG00000056851	2.26485	6.30199e-08	4.423e-07		ARG2	2.26033	5.02906e-07	3.43015e-06
	ENSSSCG00000059484	2.49422	6.31279e-08	4.42864e-07		ENSSSCG00000047586	1.53735	5.0503e-07	3.44317e-06
	SYP	1.8068	6.32374e-08	4.43437e-07		TIAM1	1.21045	5.10712e-07	3.47748e-06
	ENSSSCG00000060446	4.42809	6.35301e-08	4.451e-07		TIFA	1.79845	5.11257e-07	3.47824e-06
	ENSSSCG00000063408	2.78556	6.37421e-08	4.4639e-07		TERT	1.61305	5.11068e-07	3.47824e-06
	FAM118A	1.05744	6.38598e-08	4.47019e-07		ALKBH6	1.26619	5.30701e-07	3.59984e-06
	ABHD12	1.02858	6.64013e-08	4.63998e-07		NOB1	1.18332	5.44174e-07	3.68655e-06
	ENSSSCG00000063415	3.37042	6.64585e-08	4.64194e-07		ENSSSCG00000047620	1.72763	5.47117e-07	3.70336e-06
	ENSSSCG00000055830	1.97873	6.65352e-08	4.64527e-07		ENSSSCG00000011549	1.81489	5.56162e-07	3.75825e-06
	NUMBL	2.28778	6.77672e-08	4.72921e-07		CTC1	1.76393	5.64822e-07	3.80555e-06
	ENSSSCG00000045986	9.66713	6.80488e-08	4.74474e-07		PARP16	1.0609	5.76832e-07	3.87996e-06
	PLA2G3	3.05138	6.84978e-08	4.77189e-07		C1orf112	1.07555	6.1464e-07	4.12045e-06
	FZD5	1.25394	6.93155e-08	4.82256e-07		ENSSSCG00000045986	7.13544	6.15479e-07	4.12263e-06
	XPO4	1.04592	6.9431e-08	4.8285e-07		POLR3D	1.23786	6.19678e-07	4.14384e-06
	ENSSSCG00000047507	1.78044	6.95084e-08	4.83178e-07		NANP	1.14927	6.41288e-07	4.27938e-06
	SZT2	1.28932	6.98605e-08	4.85416e-07		SLC10A3	1.22271	6.84402e-07	4.54822e-06
	NT5C	1.95108	7.02365e-08	4.87816e-07		PIEZO1	1.31576	7.09191e-07	4.70129e-06
	MEIS3	1.80901	7.15708e-08	4.96007e-07		CER1	3.15436	7.30915e-07	4.82934e-06
	ITGA5	1.72284	7.24482e-08	5.01654e-07		ENSSSCG00000063375	1.60088	7.32732e-07	4.83935e-06
	RBM14	1.00797	7.25082e-08	5.01852e-07		SIPA1L3	1.38195	7.53417e-07	4.96779e-06
	HIRA	1.54418	7.27338e-08	5.02979e-07		PCBP3	2.95758	7.73566e-07	5.0881e-06
	ENSSSCG00000003612	1.34211	7.40178e-08	5.11416e-07		ATOSB	1.1737	8.17953e-07	5.36466e-06
	CHL1	1.46472	7.43533e-08	5.13512e-07		ENSSSCG00000043622	2.22747	8.1882e-07	5.36816e-06
	LMF2	1.03203	7.55729e-08	5.21261e-07		FGG	7.24051	8.89637e-07	5.80398e-06
	SHF	1.51949	7.65624e-08	5.27404e-07		ACO1	1.15415	9.07353e-07	5.90515e-06
	SETD1A	1.59867	7.71839e-08	5.31228e-07		APC2	1.35187	9.12952e-07	5.93918e-06
	ARHGAP31	1.19333	7.72296e-08	5.31315e-07		TCF7L2	1.04322	9.44229e-07	6.12775e-06
	SCAF1	1.23228	7.74793e-08	5.32803e-07		ENSSSCG00000043403	1.36873	9.5904e-07	6.21633e-06
	MSI1	1.83528	7.79123e-08	5.35551e-07		KRT80	2.54524	9.79636e-07	6.3415e-06
	ENSSSCG00000036988	1.88594	7.80833e-08	5.36496e-07		SLC6A9	2.55492	1.00142e-06	6.45974e-06
	DCC	2.01302	7.94206e-08	5.45216e-07		LRRC32	1.14988	1.04667e-06	6.73807e-06
	SHMT2	1.28846	7.98748e-08	5.47841e-07		DUSP4	1.24773	1.04903e-06	6.75054e-06
	OLFM2	2.39079	8.02333e-08	5.49617e-07		BTBD18	2.19995	1.05325e-06	6.77502e-06
	ATIC	1.12562	8.15645e-08	5.58497e-07		TMEM130	2.60882	1.06173e-06	6.82682e-06
	ENSSSCG00000029430	1.83792	8.24339e-08	5.63968e-07		KLF15	2.04873	1.07548e-06	6.90691e-06
	ACSL4	1.55623	8.44258e-08	5.76856e-07		NUP62	1.10491	1.07528e-06	6.90691e-06
	MST1R	1.47394	8.48006e-08	5.78922e-07		MARVELD1	1.25144	1.09077e-06	6.99999e-06
	BICC1	1.25398	8.79394e-08	5.99839e-07		SMOC2	1.33488	1.1097e-06	7.10963e-06
	ENSSSCG00000052778	7.4968	9.01323e-08	6.12188e-07		EPN1	1.01814	1.1272e-06	7.20732e-06
	SCUBE1	2.09313	9.01935e-08	6.12344e-07		ACHE	2.00458	1.14256e-06	7.29682e-06
	HAS1	4.14038	9.13382e-08	6.19853e-07		DRD1	3.15617	1.163e-06	7.42439e-06
	TRIM28	1.19113	9.37075e-08	6.34318e-07		LAMB2	1.36741	1.17959e-06	7.51237e-06
	ENSSSCG00000003868	3.25506	9.46418e-08	6.39561e-07		PSMD1	1.02806	1.18757e-06	7.56023e-06
	PPAT	1.40975	9.54338e-08	6.44369e-07		NUP93	1.08	1.21099e-06	7.69403e-06
	C2CD3	1.36667	9.58664e-08	6.46756e-07		STK11IP	1.22461	1.23287e-06	7.81144e-06
	ENSSSCG00000051344	2.70501	9.5868e-08	6.46756e-07		TBC1D25	1.4214	1.25209e-06	7.92381e-06
	FRY	1.46627	9.68084e-08	6.52824e-07		ENSSSCG00000005453	1.45104	1.26698e-06	8.01172e-06
	NT5DC2	1.76319	9.70107e-08	6.53913e-07		POLA2	1.06771	1.33384e-06	8.39156e-06
	GMDS	1.20379	9.70594e-08	6.53966e-07		VAT1L	2.10518	1.3379e-06	8.41379e-06
	ARL2BP	1.80918	9.74053e-08	6.55469e-07		PHLDB1	1.23954	1.35151e-06	8.49274e-06
	FNTB	1.26762	9.76687e-08	6.56966e-07		ENDOD1	1.49536	1.35416e-06	8.50271e-06
	IL11	6.6758	9.81052e-08	6.59624e-07		NOTCH4	1.19017	1.37372e-06	8.61876e-06
	HPDL	2.67999	9.96322e-08	6.69329e-07		NDC1	1.20342	1.37975e-06	8.64982e-06
	DOC2B	2.33147	9.96064e-08	6.69329e-07		ENSSSCG00000038364	1.23225	1.42374e-06	8.90131e-06
	DUS3L	1.92532	1.00885e-07	6.7661e-07		ATG9A	1.08924	1.43776e-06	8.98195e-06
	PTK2B	1.56524	1.02072e-07	6.84001e-07		MCM3	1.31768	1.44182e-06	9.00381e-06
	DUSP4	1.31891	1.03631e-07	6.93285e-07		ENSSSCG00000041446	1.89311	1.4491e-06	9.04221e-06
	PLAT	1.77873	1.03681e-07	6.93328e-07		ENSSSCG00000052847	2.20889	1.44889e-06	9.04221e-06
	FPGS	2.00876	1.04563e-07	6.98932e-07		S100A6	2.49726	1.45867e-06	9.08779e-06
	TRIB2	1.1711	1.04947e-07	7.01207e-07		ENSSSCG00000047783	2.95311	1.46651e-06	9.12958e-06
	DDX51	1.16578	1.05188e-07	7.02524e-07		TEPSIN	1.11107	1.51865e-06	9.41398e-06
	MTFR2	1.70942	1.05576e-07	7.0482e-07		PSKH1	1.10473	1.52349e-06	9.44033e-06
	ENSSSCG00000041254	2.41139	1.0748e-07	7.16342e-07		ENSSSCG00000033340	1.20917	1.55239e-06	9.60461e-06
	ENSSSCG00000055305	4.56746	1.08405e-07	7.22201e-07		OR1D5	4.56181	1.5722e-06	9.72339e-06
	PNPLA3	2.57067	1.09847e-07	7.309e-07		ENSSSCG00000041693	2.39158	1.60114e-06	9.88713e-06
	CRACDL	1.73917	1.11965e-07	7.44679e-07		CCNF	1.19807	1.65564e-06	1.02038e-05
	NLRC5	1.55954	1.12103e-07	7.45291e-07		SST	1.27649	1.67045e-06	1.02835e-05
	FOXK1	1.61138	1.12284e-07	7.4618e-07		TLN2	1.19604	1.67128e-06	1.02847e-05
	CLDN4	2.11094	1.14319e-07	7.59166e-07		TMEM185B	1.0331	1.68782e-06	1.03745e-05
	ENSSSCG00000061867	1.76658	1.14333e-07	7.59166e-07		NDRG4	1.4101	1.68862e-06	1.03755e-05
	ENSSSCG00000045878	3.719	1.14509e-07	7.60024e-07		ENSSSCG00000059588	1.92394	1.70281e-06	1.04506e-05
	ADAMTS1	2.27017	1.17186e-07	7.765e-07		ENSSSCG00000008677	1.03944	1.83303e-06	1.11899e-05
	EIF4A3	1.41844	1.19084e-07	7.87772e-07		SLC9A7	1.27766	1.87519e-06	1.14169e-05
	CLCN6	1.66825	1.21374e-07	8.02262e-07		BNC1	5.04458	1.91078e-06	1.16203e-05
	ENSSSCG00000043403	1.87667	1.23661e-07	8.17044e-07		CEMIP	2.28107	1.9193e-06	1.16634e-05
	NT5DC3	1.51645	1.25891e-07	8.30405e-07		ENSSSCG00000001427	1.86502	1.95429e-06	1.18625e-05
	ENSSSCG00000051626	1.73359	1.27251e-07	8.38341e-07		FAM151A	4.97974	2.00371e-06	1.21212e-05
	LRRC59	2.11038	1.28774e-07	8.47328e-07		ACSBG1	1.63823	2.00555e-06	1.21235e-05
	CLP1	1.52715	1.29297e-07	8.49754e-07		TFF3	1.55062	2.0388e-06	1.22964e-05
	ENSSSCG00000040041	2.43406	1.29974e-07	8.5347e-07		ATP2A2	1.05377	2.14404e-06	1.28827e-05
	DENND5A	1.33995	1.32633e-07	8.69502e-07		ENSSSCG00000038825	1.40652	2.15724e-06	1.29426e-05
	CHI3L1	5.59763	1.34502e-07	8.81031e-07		ENSSSCG00000032202	1.53971	2.17158e-06	1.30189e-05
	PFKFB3	2.07024	1.34774e-07	8.82089e-07		TMEM104	1.43597	2.17562e-06	1.30334e-05
	TMEM18	1.58083	1.34737e-07	8.82089e-07		LFNG	1.2406	2.18982e-06	1.31136e-05
	UAP1	1.77628	1.36409e-07	8.9243e-07		GADD45G	1.88866	2.32925e-06	1.39226e-05
	SCD5	1.94035	1.37298e-07	8.97027e-07		KLHL26	1.5368	2.36078e-06	1.40953e-05
	CRKL	1.10065	1.37336e-07	8.97027e-07		RRH	2.61926	2.39727e-06	1.42866e-05
	SLC2A1	2.33346	1.41142e-07	9.21513e-07		RHBDF1	1.03192	2.41916e-06	1.4401e-05
	NME1	1.79353	1.41506e-07	9.23511e-07		THBD	1.02053	2.42117e-06	1.44076e-05
	UNC80	1.52127	1.42107e-07	9.26686e-07		ENSSSCG00000042026	1.44374	2.4233e-06	1.44096e-05
	ENSSSCG00000058562	1.65299	1.43403e-07	9.34745e-07		ENSSSCG00000047079	2.03753	2.44953e-06	1.45387e-05
	ENSSSCG00000051237	1.44576	1.43773e-07	9.36777e-07		HMGCS1	1.47736	2.49301e-06	1.47844e-05
	ENSSSCG00000057498	2.70222	1.48143e-07	9.64071e-07		BICDL1	2.72053	2.57973e-06	1.52537e-05
	SYCE1	1.71155	1.48739e-07	9.67237e-07		SF3A2	1.34741	2.61242e-06	1.54313e-05
	ENSSSCG00000049982	2.56654	1.48808e-07	9.67237e-07		DAGLA	1.54103	2.68147e-06	1.57984e-05
	ENSSSCG00000057447	2.66939	1.4881e-07	9.67237e-07		ZBTB12	1.49185	2.78257e-06	1.63521e-05
	VAMP2	1.65648	1.5116e-07	9.80916e-07		HSF1	1.29441	2.79559e-06	1.64226e-05
	AASS	1.81592	1.52124e-07	9.86775e-07		CHTF18	1.35103	2.79701e-06	1.64249e-05
	TMEM200C	3.00014	1.52239e-07	9.8712e-07		ENSSSCG00000054355	1.57788	2.82581e-06	1.65874e-05
	ENSSSCG00000020913	3.8258	1.53582e-07	9.9542e-07		ENSSSCG00000016191	1.41914	2.85322e-06	1.67122e-05
	ENSSSCG00000053139	2.5269	1.53697e-07	9.95768e-07		RRM1	1.11584	2.92461e-06	1.70929e-05
	POLR1A	1.28428	1.55774e-07	1.0084e-06		ETV4	2.76006	2.93242e-06	1.71323e-05
	TCF7	2.43012	1.59719e-07	1.03227e-06		ACOD1	3.92053	2.96607e-06	1.73163e-05
	SRSF2	1.91294	1.60003e-07	1.03369e-06		PRR3	1.02945	2.99152e-06	1.74458e-05
	TAC4	3.54072	1.60361e-07	1.03517e-06		METTL21C	1.49198	3.00338e-06	1.74959e-05
	TAF6	1.09935	1.6054e-07	1.0359e-06		MTHFD2	1.03668	3.01576e-06	1.75617e-05
	SPSB1	2.14523	1.64003e-07	1.05783e-06		NR4A1	2.42435	3.0272e-06	1.76065e-05
	BUB1B	1.08663	1.64664e-07	1.06166e-06		ENSSSCG00000057215	2.38701	3.02785e-06	1.76065e-05
	PPP3CC	1.10819	1.6717e-07	1.07609e-06		SLC25A11	1.05754	3.15888e-06	1.83286e-05
	SGF29	1.96842	1.67522e-07	1.07749e-06		PHOX2A	4.8722	3.16646e-06	1.83527e-05
	ENSSSCG00000060759	2.42787	1.716e-07	1.10106e-06		KICS2	1.00742	3.23021e-06	1.86682e-05
	NPAS2	1.32957	1.72633e-07	1.10724e-06		ENDOG	2.22861	3.24068e-06	1.87153e-05
	GPR173	1.37626	1.72802e-07	1.10744e-06		C1R	1.08833	3.25186e-06	1.87596e-05
	CACNA1H	1.6248	1.72741e-07	1.10744e-06		ENSSSCG00000026719	1.19521	3.37067e-06	1.93822e-05
	ENSSSCG00000045459	2.12114	1.7841e-07	1.14247e-06		LRP5	1.1897	3.37739e-06	1.94001e-05
	ENSSSCG00000056336	1.22813	1.81978e-07	1.16392e-06		ENSSSCG00000044562	2.49539	3.4028e-06	1.95181e-05
	ENSSSCG00000001427	2.8792	1.82376e-07	1.166e-06		H2AC20	1.93894	3.43509e-06	1.96892e-05
	ENSSSCG00000051306	5.11158	1.88034e-07	1.19834e-06		EME1	1.88488	3.44251e-06	1.97247e-05
	ENSSSCG00000044640	7.44844	1.8822e-07	1.19905e-06		TRMT112	1.09812	3.45604e-06	1.97951e-05
	ATP2C2	1.5073	1.88468e-07	1.20015e-06		ENSSSCG00000062362	1.64376	3.57124e-06	2.03968e-05
	SIPA1L1	1.12149	1.90132e-07	1.20979e-06		ENSSSCG00000009316	1.07777	3.6014e-06	2.05617e-05
	NRP2	1.32059	1.91087e-07	1.21538e-06		PPP1R15A	1.42089	3.72567e-06	2.12057e-05
	ENSSSCG00000053691	2.28187	1.93135e-07	1.22791e-06		ENSSSCG00000045611	2.87345	3.83714e-06	2.17913e-05
	ENSSSCG00000036346	2.60766	1.95582e-07	1.24249e-06		STK24	1.02962	3.88369e-06	2.2009e-05
	ENSSSCG00000055885	1.35098	1.96337e-07	1.24679e-06		SCUBE1	1.49076	3.89614e-06	2.20717e-05
	CRLF1	3.32378	1.96916e-07	1.24997e-06		ENSSSCG00000054928	1.70417	3.92683e-06	2.2222e-05
	FOXJ3	1.04975	1.9745e-07	1.25237e-06		PCYOX1L	1.16289	3.99038e-06	2.25419e-05
	RGS2	2.60423	1.98269e-07	1.25707e-06		TGM1	3.01038	3.99686e-06	2.25706e-05
	PPP1R13B	1.34111	2.02826e-07	1.28392e-06		SLC6A14	2.10184	4.07245e-06	2.29578e-05
	TBC1D10B	1.09851	2.03408e-07	1.28659e-06		PIK3CB	1.00797	4.21481e-06	2.37096e-05
	SH3TC2	2.29448	2.04843e-07	1.29515e-06		HDAC10	1.03426	4.31545e-06	2.42078e-05
	PRMT6	1.45593	2.08345e-07	1.31626e-06		RFX2	1.90096	4.34856e-06	2.4368e-05
	TMEM130	2.3705	2.09623e-07	1.32381e-06		PLEKHG3	1.35831	4.35321e-06	2.43856e-05
	ENSSSCG00000049732	2.03784	2.1642e-07	1.36565e-06		ATF3	2.01447	4.41695e-06	2.47168e-05
	PTPRM	1.13871	2.16999e-07	1.36823e-06		BMP7	1.29132	4.50273e-06	2.51179e-05
	EDN1	3.13437	2.1756e-07	1.37015e-06		ZNF467	1.86835	4.60595e-06	2.56759e-05
	ZC3H12A	2.30776	2.18415e-07	1.37499e-06		HPCAL1	1.27253	4.76784e-06	2.64955e-05
	ENSSSCG00000051098	2.79595	2.18847e-07	1.37717e-06		FAM124A	1.84036	4.79606e-06	2.66339e-05
	ACER2	1.67156	2.24714e-07	1.41132e-06		ESRP2	1.23477	4.80271e-06	2.66616e-05
	TMC6	1.14864	2.26356e-07	1.42051e-06		REG4	1.74846	4.8769e-06	2.70361e-05
	SOX9	2.13901	2.31125e-07	1.44874e-06		SPSB3	1.81752	4.90212e-06	2.71665e-05
	ANKZF1	1.46718	2.31836e-07	1.45263e-06		PPIF	1.24961	4.95613e-06	2.74374e-05
	SHQ1	1.40949	2.33763e-07	1.46298e-06		LGALS4	1.035	4.97172e-06	2.75142e-05
	ADGRB3	1.98931	2.34467e-07	1.46624e-06		ENSSSCG00000059667	1.86709	5.07313e-06	2.80367e-05
	ARID3B	1.77453	2.40646e-07	1.50371e-06		FAM89B	1.08068	5.31899e-06	2.92946e-05
	ACKR3	1.92479	2.44142e-07	1.52436e-06		ENSSSCG00000055820	1.62256	5.36527e-06	2.94993e-05
	SELENOM	1.3718	2.48711e-07	1.54987e-06		SUSD2	1.26728	5.46755e-06	3.00303e-05
	PTPN1	1.53977	2.48844e-07	1.55009e-06		ACVR2B	1.47833	5.47751e-06	3.00645e-05
	ENSSSCG00000055078	1.23541	2.54367e-07	1.58204e-06		ASF1B	1.11691	5.50726e-06	3.01865e-05
	PLEKHG1	1.19144	2.59336e-07	1.61232e-06		GDF15	3.67129	5.52901e-06	3.02954e-05
	EIF4EBP1	1.12876	2.64836e-07	1.6446e-06		H2BC26	1.38588	5.54756e-06	3.03866e-05
	FOSL2	1.46582	2.69022e-07	1.66994e-06		ENSSSCG00000006588	2.18254	5.60079e-06	3.06468e-05
	PTK7	1.15266	2.7578e-07	1.70858e-06		KIAA0319	1.75837	5.68895e-06	3.10762e-05
	ENSSSCG00000047850	1.28817	2.77925e-07	1.72053e-06		KRTCAP2	1.04119	5.77318e-06	3.14935e-05
	S100A12	3.04005	2.82035e-07	1.74463e-06		GAS8	1.34227	5.77924e-06	3.15158e-05
	MARCHF3	2.60844	2.82688e-07	1.74799e-06		P2RX3	2.60826	5.7813e-06	3.15163e-05
	MAPK10	1.47205	2.83407e-07	1.75176e-06		ARNT2	1.40347	5.79928e-06	3.15929e-05
	CELSR1	1.22246	2.87673e-07	1.77607e-06		DCAKD	1.36824	5.81871e-06	3.1688e-05
	ENSSSCG00000046709	1.80881	2.89089e-07	1.78275e-06		DNTTIP1	1.33377	5.92937e-06	3.22032e-05
	CDC20	1.74946	2.96077e-07	1.82157e-06		NDUFAF6	1.16641	5.96894e-06	3.23743e-05
	SLC22A3	1.46455	2.96264e-07	1.82157e-06		MCM5	1.13459	5.97268e-06	3.23836e-05
	SLC22A15	1.88244	2.96294e-07	1.82157e-06		ZDHHC18	1.01952	5.97531e-06	3.23869e-05
	ENSSSCG00000063274	2.3082	3.02565e-07	1.85673e-06		CLIP3	1.59537	5.97955e-06	3.2399e-05
	ATP2A3	1.03103	3.05412e-07	1.87188e-06		CHRDL1	1.33205	6.00547e-06	3.25284e-05
	JDP2	1.00118	3.05811e-07	1.87361e-06		METAP1D	1.60376	6.40461e-06	3.45272e-05
	KCNT2	1.72955	3.12688e-07	1.91354e-06		RNASE4	1.11822	6.4395e-06	3.46804e-05
	ENSSSCG00000050495	4.53023	3.15639e-07	1.93013e-06		PLPP6	1.25144	6.6129e-06	3.55189e-05
	MEGF10	1.73845	3.199e-07	1.95543e-06		ENSSSCG00000059247	2.31951	6.6332e-06	3.56041e-05
	CLK3	1.2789	3.22574e-07	1.96877e-06		CPQ	1.01123	6.96038e-06	3.71981e-05
	NFAM1	1.69668	3.23709e-07	1.9742e-06		RIC3	1.73149	6.96262e-06	3.71981e-05
	ENSSSCG00000048049	1.6107	3.26084e-07	1.98792e-06		POLD2	1.67726	6.96812e-06	3.72151e-05
	SLC25A33	1.71214	3.29333e-07	2.00391e-06		RPUSD1	1.09782	7.03219e-06	3.75323e-05
	CDCA4	1.12519	3.30589e-07	2.01079e-06		SEMA4G	1.11645	7.16034e-06	3.81528e-05
	KIAA1522	1.2137	3.31229e-07	2.01392e-06		AGTR1	1.12905	7.32743e-06	3.89784e-05
	ENSSSCG00000054600	3.69697	3.31835e-07	2.01567e-06		ENSSSCG00000036346	2.19319	7.44739e-06	3.95772e-05
	TBRG4	1.22215	3.35702e-07	2.03802e-06		SDR42E1	1.05151	7.48675e-06	3.97601e-05
	ENSSSCG00000027026	2.74106	3.37585e-07	2.0479e-06		CEP192	1.00935	7.65422e-06	4.06124e-05
	GTF3C4	1.09353	3.40554e-07	2.06512e-06		NT5DC3	1.30925	7.66188e-06	4.06363e-05
	ITIH3	1.93936	3.43316e-07	2.08109e-06		SNRNP48	1.13581	8.00545e-06	4.23367e-05
	NUP93	1.3315	3.46426e-07	2.09756e-06		ARL14	2.79621	8.02464e-06	4.24201e-05
	C1S	1.86338	3.4844e-07	2.10736e-06		HERPUD1	1.05864	8.07504e-06	4.26725e-05
	ENSSSCG00000051327	2.75994	3.52222e-07	2.12943e-06		NPAS2	1.33358	8.20161e-06	4.32417e-05
	ENSSSCG00000021535	2.6504	3.60755e-07	2.17772e-06		OLFM2	2.01099	8.32512e-06	4.37634e-05
	SLC25A3	1.31989	3.62123e-07	2.184e-06		KRT7	1.68017	8.46214e-06	4.43965e-05
	TACSTD2	8.11405	3.65038e-07	2.20026e-06		ENSSSCG00000007920	2.32227	8.50885e-06	4.46124e-05
	TNFAIP3	2.18664	3.65917e-07	2.2039e-06		ENSSSCG00000050482	2.37398	8.62909e-06	4.51985e-05
	ENSSSCG00000017754	2.10232	3.65871e-07	2.2039e-06		ENSSSCG00000043987	1.0448	8.6956e-06	4.55023e-05
	PTPRN	3.26112	3.67268e-07	2.2112e-06		FOXA3	1.48792	8.75971e-06	4.58229e-05
	RNF151	2.06669	3.78112e-07	2.27137e-06		RNF151	2.14148	8.76506e-06	4.58359e-05
	TMX4	1.21647	3.802e-07	2.2822e-06		MYO5C	1.06877	8.80646e-06	4.60374e-05
	ENSSSCG00000050847	2.16596	3.92137e-07	2.35104e-06		FAIM2	1.16168	8.87668e-06	4.63592e-05
	FLOT2	1.49662	3.93218e-07	2.35504e-06		ENSSSCG00000047507	1.48769	8.9067e-06	4.64856e-05
	ENSSSCG00000049923	3.53824	3.93564e-07	2.35623e-06		ENSSSCG00000048875	2.60219	8.99861e-06	4.68862e-05
	TIFA	1.66373	4.00135e-07	2.39468e-06		ANKS3	1.00223	9.06552e-06	4.72072e-05
	ENSSSCG00000051128	1.93599	4.0313e-07	2.4117e-06		IDO1	3.10113	9.15675e-06	4.76513e-05
	ARHGAP32	1.15178	4.07492e-07	2.43416e-06		ACER2	1.53894	9.32226e-06	4.84812e-05
	ENSSSCG00000032668	1.85921	4.1055e-07	2.44786e-06		PRDM8	2.53033	9.53013e-06	4.94661e-05
	GINS1	1.64496	4.13423e-07	2.46407e-06		C11orf42	2.02531	9.56349e-06	4.96232e-05
	VASN	2.22952	4.24683e-07	2.52648e-06		CHST4	2.231	9.66683e-06	5.0127e-05
	C1orf112	1.10063	4.31833e-07	2.56235e-06		KIF2C	1.32961	9.67697e-06	5.01633e-05
	EMD	1.3127	4.35012e-07	2.58025e-06		RFLNA	1.72803	9.71295e-06	5.03336e-05
	A4GALT	1.59256	4.41399e-07	2.61346e-06		EIF4A1	1.03307	9.80686e-06	5.07875e-05
	STC2	1.56464	4.42774e-07	2.62047e-06		SCN11A	1.27768	9.90734e-06	5.12087e-05
	POLD1	1.55845	4.43104e-07	2.62145e-06		GPR15	1.8852	9.91479e-06	5.12307e-05
	KLRG2	2.97589	4.52384e-07	2.67044e-06		MBOAT1	1.20316	1.00637e-05	5.19835e-05
	KCTD4	1.24037	4.59172e-07	2.70751e-06		MIF	1.13247	1.05178e-05	5.41895e-05
	MAPRE3	2.60684	4.60221e-07	2.71169e-06		SH3TC2	2.14149	1.09675e-05	5.63258e-05
	MAST4	1.31244	4.63402e-07	2.72944e-06		TMEM109	1.18578	1.10836e-05	5.68125e-05
	CDK6	1.21584	4.7083e-07	2.77216e-06		TRIM7	1.60092	1.12589e-05	5.76376e-05
	MRTFA	1.62603	4.74482e-07	2.79264e-06		B9D1	1.13364	1.14591e-05	5.86062e-05
	PHRF1	1.04616	4.77072e-07	2.80685e-06		PLSCR4	1.36095	1.16287e-05	5.9398e-05
	ENSSSCG00000054045	3.61939	4.82217e-07	2.83486e-06		ENSSSCG00000038404	1.05159	1.16589e-05	5.95333e-05
	ENSSSCG00000063242	2.73302	4.84142e-07	2.84427e-06		SMCR8	1.19383	1.16699e-05	5.95707e-05
	RIC3	1.87765	4.9016e-07	2.87646e-06		MCAT	1.01427	1.16853e-05	5.96114e-05
	S100A2	5.20614	4.90442e-07	2.87706e-06		ATRIP	1.0211	1.1719e-05	5.97453e-05
	ENSSSCG00000048763	1.9196	4.91664e-07	2.88317e-06		CSMD3	1.71637	1.18019e-05	6.00917e-05
	FSTL3	1.50818	4.99725e-07	2.92402e-06		SLC7A2	1.49625	1.18498e-05	6.02779e-05
	KIF5A	1.53816	5.03276e-07	2.94371e-06		PLCD1	1.17844	1.19985e-05	6.09766e-05
	PLOD3	1.24466	5.06211e-07	2.95872e-06		KMT5C	1.44576	1.21385e-05	6.15829e-05
	ADAM15	1.34485	5.09775e-07	2.97846e-06		SELENBP1	1.39746	1.22011e-05	6.18299e-05
	CCNK	1.09908	5.16525e-07	3.0157e-06		PRIM2	1.04008	1.22482e-05	6.20294e-05
	PRTN3	5.57372	5.23075e-07	3.05283e-06		VAC14	1.08337	1.23035e-05	6.22704e-05
	CEMIP	4.55022	5.4955e-07	3.19918e-06		TNS1	1.06586	1.23496e-05	6.24643e-05
	ITPRIP	1.25523	5.56427e-07	3.23568e-06		CCR7	2.75294	1.2394e-05	6.26692e-05
	UNC5D	2.56503	5.58702e-07	3.24773e-06		GJB1	1.68965	1.24008e-05	6.26774e-05
	ENSSSCG00000044623	1.91816	5.63315e-07	3.27336e-06		EEF1AKMT4	1.35468	1.31436e-05	6.61464e-05
	ICA1L	2.37168	5.66541e-07	3.28972e-06		TFB1M	1.12336	1.32506e-05	6.66223e-05
	KLF13	1.26951	5.82559e-07	3.3766e-06		TRIB1	1.1855	1.36264e-05	6.83394e-05
	ST8SIA2	1.67333	5.83254e-07	3.37941e-06		ENSSSCG00000055086	1.53203	1.36274e-05	6.83394e-05
	KIFC1	1.87139	5.95965e-07	3.44682e-06		ANP32B	1.09606	1.36304e-05	6.83394e-05
	ENSSSCG00000008677	1.28262	6.0217e-07	3.47894e-06		DNASE1L2	1.33635	1.37896e-05	6.90943e-05
	NOL6	1.454	6.05237e-07	3.4954e-06		GNAZ	1.06585	1.38771e-05	6.95112e-05
	ENSSSCG00000001616	1.99202	6.12499e-07	3.53224e-06		ENSSSCG00000015383	1.07434	1.4377e-05	7.18134e-05
	ENSSSCG00000014031	1.47817	6.15563e-07	3.54608e-06		ENSSSCG00000059484	1.69846	1.48275e-05	7.39029e-05
	ANKS3	1.35287	6.1994e-07	3.56872e-06		AGPAT4	1.06824	1.49629e-05	7.4485e-05
	PLPP3	1.21527	6.21298e-07	3.57526e-06		ENSSSCG00000043652	1.13379	1.49854e-05	7.45508e-05
	ENSSSCG00000049691	1.78345	6.22816e-07	3.5827e-06		ENSSSCG00000059519	1.31418	1.50333e-05	7.47657e-05
	FABP3	2.06859	6.23091e-07	3.583e-06		ENSSSCG00000061867	1.40711	1.50385e-05	7.47684e-05
	ENSSSCG00000048993	2.12154	6.33682e-07	3.64128e-06		TAF6L	1.02778	1.50779e-05	7.49412e-05
	ENSSSCG00000009969	4.50899	6.35403e-07	3.64986e-06		CHL1	1.34989	1.51133e-05	7.50869e-05
	RBM15B	1.20412	6.42224e-07	3.68508e-06		CYP8B1	3.89385	1.53607e-05	7.62052e-05
	FAM53C	1.41335	6.52303e-07	3.73755e-06		RIMBP2	1.41126	1.55294e-05	7.69451e-05
	SLC5A7	1.73314	6.72747e-07	3.85193e-06		GAS1	1.50175	1.55515e-05	7.7009e-05
	ANO8	1.57177	6.82888e-07	3.90441e-06		NAT10	1.1748	1.55636e-05	7.70215e-05
	ASMTL	1.44256	6.91014e-07	3.94664e-06		RETN	2.23128	1.55631e-05	7.70215e-05
	BTN1A1	7.03107	6.97269e-07	3.97811e-06		MS4A8	2.26168	1.609e-05	7.93815e-05
	PTP4A3	2.42941	7.09823e-07	4.04483e-06		EPX	5.67766	1.62013e-05	7.98814e-05
	STEAP3	1.38721	7.22464e-07	4.11452e-06		NLE1	1.27037	1.63807e-05	8.07166e-05
	NCKIPSD	1.00575	7.29796e-07	4.1548e-06		TMX2	1.14439	1.68592e-05	8.27187e-05
	RBM22	1.237	7.5606e-07	4.29821e-06		GGN	1.81286	1.76808e-05	8.64063e-05
	INTS9	1.02137	7.57531e-07	4.30504e-06		CCL28	2.16714	1.83424e-05	8.94493e-05
	IL17D	2.06811	7.61074e-07	4.32211e-06		CFB	1.69681	1.87187e-05	9.11183e-05
	ENSSSCG00000008147	1.56754	7.65731e-07	4.34548e-06		CELF3	2.41566	1.87614e-05	9.12985e-05
	CCR1	1.51291	7.71989e-07	4.37944e-06		LPIN1	1.31455	1.87981e-05	9.14492e-05
	PPP2R5D	1.70861	7.82135e-07	4.43228e-06		PRR11	1.24502	1.88155e-05	9.15058e-05
	RCOR1	1.0272	7.85195e-07	4.44648e-06		SARS2	1.1936	1.88401e-05	9.15422e-05
	ABCA2	1.24156	7.88263e-07	4.46227e-06		ENSSSCG00000048073	1.11609	1.88356e-05	9.15422e-05
	PHF13	1.50739	7.90159e-07	4.46984e-06		MAP3K14	1.16846	1.89499e-05	9.20202e-05
	CHERP	1.02354	7.95987e-07	4.49963e-06		RTN1	1.52234	1.91426e-05	9.28157e-05
	NAT10	1.47518	8.02658e-07	4.53254e-06		TJP3	1.03093	1.92996e-05	9.34638e-05
	ZNF703	1.16112	8.03269e-07	4.53439e-06		MAST1	3.3463	1.9338e-05	9.36217e-05
	SHKBP1	1.43675	8.13711e-07	4.5901e-06		ENSSSCG00000042766	1.69332	1.95224e-05	9.44575e-05
	SIPA1L2	1.50166	8.1434e-07	4.59203e-06		CSF3R	2.12308	1.95435e-05	9.45308e-05
	NOL11	1.41133	8.37059e-07	4.71019e-06		PTGS2	1.76772	2.02273e-05	9.75737e-05
	DAB2IP	1.18159	8.38623e-07	4.71401e-06		TTC27	1.05293	2.02399e-05	9.76052e-05
	ENSSSCG00000007552	2.98331	8.4277e-07	4.73234e-06		PTPN18	1.09138	2.05809e-05	9.91604e-05
	CACNA1C	1.63415	8.43093e-07	4.73249e-06		NR4A3	1.41469	2.1143e-05	0.000101625
	ENSSSCG00000033189	1.50232	8.44059e-07	4.73626e-06		ENSSSCG00000054032	1.99926	2.13552e-05	0.000102522
	POU2F1	1.07123	8.49218e-07	4.76353e-06		MAB21L1	2.31567	2.15802e-05	0.000103571
	NOTCH3	1.38855	8.56806e-07	4.80105e-06		FDXACB1	1.05403	2.16823e-05	0.00010403
	ENSSSCG00000024660	2.21566	8.82421e-07	4.93767e-06		LRP8	1.74932	2.19004e-05	0.000104951
	DENND2A	1.35609	8.88224e-07	4.96494e-06		RRP9	1.13778	2.27591e-05	0.000108709
	HPSE2	1.34253	8.89536e-07	4.97053e-06		CCL11	1.15764	2.32963e-05	0.000110911
	FBXO32	1.27785	9.04523e-07	5.04723e-06		ENSSSCG00000032652	1.35814	2.36997e-05	0.000112632
	PIP4P1	1.06442	9.09494e-07	5.0719e-06		NOP56	1.0801	2.38422e-05	0.000113141
	ANP32B	1.43398	9.12473e-07	5.08627e-06		ARPP21	2.24773	2.38603e-05	0.000113193
	ENSSSCG00000043390	1.05196	9.14667e-07	5.09673e-06		IHO1	1.43135	2.41355e-05	0.00011433
	EIF3L	1.06418	9.16609e-07	5.10577e-06		POLR1A	1.04123	2.52158e-05	0.000119026
	ENSSSCG00000032999	1.65806	9.21501e-07	5.12946e-06		RPUSD2	1.30992	2.52128e-05	0.000119026
	COL6A2	1.31372	9.42021e-07	5.24186e-06		SH3BP4	1.09028	2.52443e-05	0.000119125
	ENSSSCG00000038594	2.4577	9.49396e-07	5.27922e-06		AACS	1.16578	2.53696e-05	0.000119576
	PCIF1	1.03986	9.54038e-07	5.30319e-06		KIF1A	1.47047	2.56226e-05	0.000120698
	NTN1	1.50459	9.61066e-07	5.333e-06		FBXW8	1.18909	2.6038e-05	0.000122546
	CD200	1.31407	9.65893e-07	5.35607e-06		ENSSSCG00000042299	1.78363	2.61928e-05	0.000123203
	GDAP1	1.55964	9.78164e-07	5.41849e-06		APLP1	1.42854	2.63592e-05	0.00012384
	ENDOD1	2.27507	9.82508e-07	5.43879e-06		ENSSSCG00000035290	1.84576	2.63893e-05	0.000123945
	KIAA0319	1.95898	9.88204e-07	5.46842e-06		ENSSSCG00000053790	1.92327	2.65814e-05	0.000124702
	ENSSSCG00000056881	1.91011	9.92189e-07	5.48576e-06		TLE4	1.07537	2.659e-05	0.000124706
	DNTTIP1	1.42247	1.00037e-06	5.52811e-06		ENSSSCG00000059730	4.8772	2.70767e-05	0.000126618
	TBC1D25	1.40724	1.00776e-06	5.56126e-06		ENSSSCG00000050047	1.15617	2.73236e-05	0.000127661
	JUNB	1.92851	1.02305e-06	5.6398e-06		H1-3	1.37706	2.74824e-05	0.000128328
	STAC	2.27455	1.03299e-06	5.69264e-06		NWD2	1.0938	2.81849e-05	0.000131379
	ENSSSCG00000058219	1.69714	1.03358e-06	5.69392e-06		TEX30	1.24231	2.8194e-05	0.000131384
	PTH1R	1.51396	1.04975e-06	5.77906e-06		IL4I1	1.79838	2.83463e-05	0.000131978
	FBXL18	1.18689	1.06862e-06	5.87687e-06		ENSSSCG00000045459	1.22736	2.88389e-05	0.000134062
	TNK2	1.62448	1.09442e-06	6.01255e-06		ENSSSCG00000014800	1.87563	2.91379e-05	0.000135311
	CEP192	1.17558	1.09987e-06	6.03836e-06		THPO	4.43264	2.94712e-05	0.000136621
	ENSSSCG00000046737	2.48311	1.1054e-06	6.06247e-06		CLDN23	1.19742	2.97807e-05	0.000137976
	ARAP3	1.43726	1.11487e-06	6.11022e-06		NAPB	1.26044	2.98065e-05	0.000138056
	PLEKHG5	1.49059	1.13221e-06	6.20313e-06		TTC22	1.23619	2.98918e-05	0.000138372
	ENSSSCG00000056350	2.24879	1.13362e-06	6.20662e-06		ENSSSCG00000061605	2.73174	3.00455e-05	0.000139003
	SLC25A28	1.35362	1.14876e-06	6.28307e-06		ENSSSCG00000055971	2.23652	3.0552e-05	0.000141224
	GSE1	1.23954	1.14988e-06	6.28704e-06		FANCD2	1.28285	3.1188e-05	0.000143749
	H2BC11	1.91026	1.15209e-06	6.29698e-06		CAMSAP3	1.2919	3.20682e-05	0.000147552
	FCHO1	1.87533	1.17856e-06	6.4263e-06		MAGEF1	1.01758	3.22884e-05	0.00014848
	CHRDL1	1.6015	1.18577e-06	6.46337e-06		CPT1C	1.39502	3.29848e-05	0.000151293
	PAPPA2	2.42069	1.18659e-06	6.46565e-06		CENPM	1.08077	3.31016e-05	0.000151785
	HENMT1	2.82165	1.19179e-06	6.49181e-06		ENSSSCG00000047223	1.62304	3.36266e-05	0.000153797
	G6PD	1.34667	1.20135e-06	6.53499e-06		TK1	1.11665	3.38334e-05	0.000154699
	ENSSSCG00000005916	1.711	1.20523e-06	6.55383e-06		CDK1	1.20224	3.44603e-05	0.00015743
	MED20	1.42858	1.20582e-06	6.55484e-06		DGKG	1.28819	3.47792e-05	0.000158842
	RGS16	3.01718	1.21218e-06	6.58714e-06		ENSSSCG00000035208	1.62084	3.52747e-05	0.000160968
	IGSF9B	2.53069	1.23059e-06	6.67812e-06		FOXS1	1.31535	3.53057e-05	0.000161042
	COTL1	1.54235	1.2375e-06	6.71335e-06		SUPT7L	1.31416	3.54458e-05	0.000161611
	ENSSSCG00000063463	1.06415	1.24594e-06	6.75458e-06		H2AC4	1.25562	3.55072e-05	0.000161799
	ENSSSCG00000041446	2.16205	1.25122e-06	6.7786e-06		ARHGAP44	2.68536	3.56035e-05	0.000162192
	TRAP1	1.12302	1.25759e-06	6.81082e-06		C9orf152	1.38909	3.67666e-05	0.000166969
	LRP5	1.13331	1.27697e-06	6.91111e-06		ENSSSCG00000053902	1.47202	3.67903e-05	0.000167019
	CRY2	1.15761	1.2884e-06	6.96118e-06		SH2D3C	1.27086	3.76755e-05	0.000170662
	TUBB3	1.21127	1.31638e-06	7.09801e-06		IL20RB	2.40298	3.84294e-05	0.000173782
	ENSSSCG00000027665	1.83584	1.3195e-06	7.11243e-06		ENSSSCG00000044640	7.27164	3.89454e-05	0.000175819
	ABLIM2	2.17301	1.32777e-06	7.1546e-06		GNA14	1.02694	3.90293e-05	0.000175999
	CALY	3.16546	1.3522e-06	7.28133e-06		PUSL1	1.36131	3.9204e-05	0.000176688
	PRAM1	2.24502	1.35484e-06	7.29306e-06		ENSSSCG00000024568	2.10719	3.92385e-05	0.000176794
	ENSSSCG00000047927	1.84709	1.35645e-06	7.29894e-06		ALPL	2.4747	3.93076e-05	0.000177006
	ANKRD52	1.23723	1.36183e-06	7.32088e-06		SLC51A	1.05521	3.97144e-05	0.000178445
	REC8	2.33832	1.3806e-06	7.41432e-06		ENSSSCG00000029752	1.24624	3.97487e-05	0.000178491
	PHOX2A	5.03098	1.39438e-06	7.4833e-06		TCF7	1.34548	3.98256e-05	0.000178736
	ENSSSCG00000029231	2.7956	1.3978e-06	7.49913e-06		CGAS	1.07372	4.01522e-05	0.000179951
	ECEL1	5.48381	1.40772e-06	7.54478e-06		ATP7B	1.05979	4.06873e-05	0.000182145
	SREBF2	1.27787	1.42629e-06	7.62895e-06		CDCA5	1.19109	4.26885e-05	0.000190519
	FAM110C	1.2234	1.42581e-06	7.62895e-06		SPRED2	1.14985	4.31042e-05	0.000192214
	PLAU	1.55807	1.46138e-06	7.80619e-06		TMEM200B	1.22083	4.32096e-05	0.000192631
	CAMSAP1	1.08765	1.46233e-06	7.80866e-06		RECQL4	1.33038	4.36545e-05	0.000194452
	RRP1B	1.29791	1.47495e-06	7.86866e-06		CLCN6	1.33667	4.48216e-05	0.000199429
	S100A8	3.44942	1.48131e-06	7.89948e-06		POP1	1.11624	4.51151e-05	0.000200569
	ENSSSCG00000000887	2.00163	1.4949e-06	7.96664e-06		LIFR	1.06808	4.53034e-05	0.00020135
	PARD6G	1.29727	1.5137e-06	8.06151e-06		ENSSSCG00000052472	1.57593	4.57582e-05	0.000203258
	USP54	1.20023	1.51887e-06	8.08365e-06		GIPR	2.07508	4.62937e-05	0.000205183
	LONP1	1.1678	1.52935e-06	8.13669e-06		UPK3B	5.04415	4.73516e-05	0.000209582
	JPH4	2.30351	1.53865e-06	8.18076e-06		FBXO32	1.22732	4.76157e-05	0.000210519
	AGT	2.32454	1.54588e-06	8.21374e-06		MMP7	2.84565	4.76787e-05	0.000210739
	NFKBIZ	1.94286	1.56807e-06	8.32334e-06		ENSSSCG00000020913	3.21013	4.77769e-05	0.000211058
	PLEKHG3	1.585	1.58075e-06	8.38786e-06		DOCK3	1.79547	4.8796e-05	0.000214967
	ADAMTSL1	1.22389	1.60756e-06	8.52164e-06		FAM89A	1.5536	5.07522e-05	0.000222912
	OSM	3.25297	1.6269e-06	8.62134e-06		MMP12	3.51935	5.12389e-05	0.000224878
	FTSJ1	1.32434	1.64278e-06	8.69445e-06		VASN	1.3291	5.16841e-05	0.000226633
	ENSSSCG00000040632	1.21396	1.64287e-06	8.69445e-06		STUM	1.50094	5.18086e-05	0.000227117
	TKT	1.31813	1.6719e-06	8.83929e-06		FCN2	1.54719	5.23399e-05	0.000229071
	ENSSSCG00000034920	2.97793	1.69421e-06	8.95134e-06		SPINK6	6.62238	5.24013e-05	0.000229277
	CUL9	1.24138	1.70388e-06	8.99424e-06		SEMA4B	1.59565	5.35044e-05	0.000233467
	TYMS	1.58901	1.70401e-06	8.99424e-06		ERAL1	1.04138	5.37136e-05	0.000234189
	NRXN3	5.4237	1.72531e-06	9.09764e-06		A4GNT	1.57415	5.5166e-05	0.00024
	ENSSSCG00000032113	1.22417	1.72674e-06	9.10219e-06		TMEM63A	1.09102	5.52067e-05	0.000240112
	NEURL1B	1.58039	1.75875e-06	9.26031e-06		XRCC3	1.2815	5.53302e-05	0.000240584
	ENSSSCG00000057276	1.77495	1.75905e-06	9.26031e-06		C2orf72	1.61003	5.60229e-05	0.000243135
	RANGAP1	1.27012	1.76978e-06	9.31067e-06		GLDC	1.88491	5.62893e-05	0.000244224
	ENSSSCG00000044826	2.38904	1.7725e-06	9.32195e-06		ECEL1	5.09412	5.64849e-05	0.000245007
	KLHL5	1.03363	1.77396e-06	9.32654e-06		PHOX2B	1.64291	5.82607e-05	0.000252164
	ABCF2	1.33368	1.80627e-06	9.48707e-06		ENSSSCG00000041356	1.56324	5.85229e-05	0.000253231
	ENSSSCG00000063153	4.64982	1.81432e-06	9.52623e-06		SLC2A1	1.74548	5.85724e-05	0.000253377
	ENSSSCG00000041693	2.25363	1.81596e-06	9.53171e-06		ANKZF1	1.13575	5.8599e-05	0.000253424
	ENSSSCG00000041534	2.04389	1.82722e-06	9.58452e-06		ENSSSCG00000010370	2.28045	5.90058e-05	0.000254977
	COL4A2	1.44722	1.83747e-06	9.63511e-06		ADCY8	1.60525	5.95477e-05	0.000257111
	BRINP1	2.11974	1.868e-06	9.78882e-06		AGT	1.82909	5.97413e-05	0.000257783
	MAP3K8	1.4401	1.89437e-06	9.92051e-06		IGF2BP1	1.22835	6.00944e-05	0.000259053
	ENSSSCG00000062085	2.55333	1.93284e-06	1.0112e-05		ENPP6	1.40801	6.01188e-05	0.000259089
	ABCA6	1.6264	1.95329e-06	1.02092e-05		CNR1	2.00352	6.06179e-05	0.000261029
	ENSSSCG00000044304	2.14552	1.9585e-06	1.02296e-05		ENSSSCG00000045051	2.35642	6.13585e-05	0.000263864
	SLC29A4	2.09133	1.99987e-06	1.04286e-05		ADAR	1.01025	6.17249e-05	0.000265369
	PEF1	1.25288	2.00182e-06	1.04354e-05		BAG2	1.37254	6.18861e-05	0.00026592
	ENSSSCG00000008001	6.64443	2.00555e-06	1.0451e-05		UNC80	1.37834	6.19664e-05	0.000266194
	DDX28	1.86396	2.02369e-06	1.05357e-05		LCN2	3.47952	6.27769e-05	0.000269387
	REG4	1.70498	2.02511e-06	1.05396e-05		SYN2	2.13139	6.32114e-05	0.000271034
	FAAP100	1.1105	2.02756e-06	1.0549e-05		ASTN1	1.83019	6.35931e-05	0.000272452
	EPN1	1.03685	2.04653e-06	1.06407e-05		STEAP1	2.1649	6.38419e-05	0.000273445
	ELAC2	1.23406	2.07625e-06	1.07796e-05		HMGCR	1.11444	6.46618e-05	0.000276809
	CACNA1E	1.60366	2.09003e-06	1.08423e-05		ZNF593	1.09149	6.46854e-05	0.000276836
	TAF1C	1.32409	2.11472e-06	1.09597e-05		ENSSSCG00000003236	1.72788	6.50636e-05	0.000278232
	CSF2	3.79854	2.12308e-06	1.09995e-05		NPY2R	3.88226	6.52238e-05	0.000278769
	ENSSSCG00000050401	1.46732	2.13312e-06	1.10444e-05		PITX2	1.07334	6.53246e-05	0.000279125
	ADPRH	1.26357	2.15659e-06	1.1155e-05		POLD1	1.22264	6.77259e-05	0.000288158
	ATG2A	1.38378	2.16035e-06	1.11709e-05		NTMT1	1.13649	6.78302e-05	0.000288449
	PLVAP	1.12763	2.17204e-06	1.12277e-05		NT5DC2	1.27364	6.87964e-05	0.000292403
	PURB	1.38585	2.18837e-06	1.13012e-05		ENSSSCG00000053372	5.04487	7.02313e-05	0.000297713
	POLR1B	1.23679	2.19744e-06	1.13407e-05		ACKR4	1.23318	7.17865e-05	0.000303799
	AACS	1.17429	2.20715e-06	1.13867e-05		UBE3D	1.32616	7.17994e-05	0.000303799
	GPR15	2.69062	2.23198e-06	1.15041e-05		TMPRSS9	2.38526	7.29122e-05	0.000308182
	AFAP1	1.73691	2.24295e-06	1.15495e-05		MBD6	1.04399	7.3043e-05	0.000308573
	PITPNC1	1.81484	2.24637e-06	1.15634e-05		STC1	1.69731	7.35395e-05	0.000310506
	HIST1H3E	1.96509	2.26574e-06	1.16519e-05		ENSSSCG00000039830	1.0399	7.35717e-05	0.000310561
	SEZ6L2	2.46621	2.30816e-06	1.18624e-05		MDH2	1.05409	7.41631e-05	0.00031281
	INTS1	1.10945	2.38814e-06	1.2242e-05		HAUS4	1.06352	7.48716e-05	0.00031555
	ENSSSCG00000005508	1.37069	2.40209e-06	1.23056e-05		SLC25A21	1.34594	7.53813e-05	0.000317115
	INCENP	1.57648	2.41428e-06	1.23602e-05		ENSSSCG00000012074	1.10041	7.65607e-05	0.000321824
	ENSSSCG00000010370	2.52624	2.42293e-06	1.23965e-05		RTEL1	1.18463	7.66488e-05	0.00032211
	WDR38	2.59811	2.45225e-06	1.25305e-05		ENSSSCG00000045040	1.35597	7.76253e-05	0.000325903
	HIP1	1.25542	2.459e-06	1.2561e-05		ENSSSCG00000062662	3.97692	7.82544e-05	0.000328084
	ENSSSCG00000032609	2.11886	2.47719e-06	1.2634e-05		ENSSSCG00000004839	1.53362	7.92636e-05	0.000331968
	EXOC2	1.07217	2.49396e-06	1.27112e-05		LPAR5	1.55368	7.95562e-05	0.000332933
	ELANE	2.57747	2.50551e-06	1.27578e-05		PLAC9	1.14796	8.10237e-05	0.000338721
	POLR3D	1.47897	2.52745e-06	1.28655e-05		ADAM15	1.32159	8.12874e-05	0.000339679
	DAGLA	1.61476	2.54999e-06	1.2972e-05		CD274	1.53195	8.18673e-05	0.000341713
	MARK4	1.39781	2.61542e-06	1.32837e-05		ENSSSCG00000063242	1.81485	8.24972e-05	0.000343985
	SLIT1	1.90833	2.62854e-06	1.33461e-05		TEAD4	2.4005	8.41583e-05	0.000350274
	MAN1C1	1.04815	2.65509e-06	1.34724e-05		SLCO2A1	1.06958	8.4245e-05	0.000350453
	ENSSSCG00000012074	1.36351	2.65724e-06	1.3479e-05		RNF39	3.19506	8.45879e-05	0.000351652
	ENSSSCG00000044626	2.22046	2.68019e-06	1.35868e-05		ENSSSCG00000063417	2.0844	8.53981e-05	0.00035479
	MICAL3	1.12391	2.68142e-06	1.35888e-05		STEAP3	1.03509	8.54971e-05	0.00035511
	MTHFD2	1.25437	2.72202e-06	1.37814e-05		SERPINB10	1.92273	8.56111e-05	0.000355356
	RAD9A	1.21772	2.74723e-06	1.39003e-05		SEZ6L2	2.23657	8.5645e-05	0.000355356
	TEPSIN	1.20214	2.74988e-06	1.39093e-05		LPAR2	1.84215	8.63139e-05	0.000357761
	AEBP1	1.51045	2.83439e-06	1.43096e-05		NFKBIA	1.31363	8.68863e-05	0.000359855
	PLK2	1.33203	2.86943e-06	1.44774e-05		FA2H	1.28629	8.6922e-05	0.00035991
	HM13	1.02363	2.87437e-06	1.44978e-05		ENSSSCG00000063408	2.61198	8.8347e-05	0.000365433
	SCRN1	1.84633	2.88479e-06	1.45457e-05		SBK1	2.54387	8.95309e-05	0.000369854
	ZDHHC2	1.18564	2.94303e-06	1.483e-05		SEMA6C	1.34253	8.96354e-05	0.000369904
	ENSSSCG00000050889	3.12402	2.94697e-06	1.48452e-05		NPM3	1.53904	9.18506e-05	0.000378074
	HIPK2	1.37163	2.96573e-06	1.49303e-05		TRNP1	1.71697	9.33761e-05	0.000383664
	ADCY3	1.15032	2.97489e-06	1.49717e-05		ENSSSCG00000056180	1.39968	9.35478e-05	0.000384075
	NOS1	2.57935	3.00816e-06	1.51297e-05		SMOC1	1.59455	9.53077e-05	0.000390701
	WWC3	1.07325	3.02207e-06	1.519e-05		IL29	3.56727	9.85812e-05	0.000402988
	ENSSSCG00000043880	2.28553	3.09652e-06	1.55496e-05		ENSSSCG00000051436	1.73664	9.89896e-05	0.000404348
	AKNA	1.85527	3.10265e-06	1.55755e-05		SMYD5	1.1311	9.98345e-05	0.000407472
	SPSB3	1.70825	3.11416e-06	1.56137e-05		TNFRSF12A	1.2045	0.000100377	0.000409443
	HEG1	1.02666	3.11846e-06	1.56304e-05		S100Z	2.35759	0.000100542	0.000409854
	NDRG4	1.12769	3.14277e-06	1.57276e-05		SQLE	1.43192	0.000100778	0.000410609
	BORA	1.26497	3.17476e-06	1.58778e-05		SEMA4F	1.20609	0.000102583	0.000417431
	NUP133	1.22032	3.23402e-06	1.61489e-05		CD44	1.101	0.000103051	0.000419232
	ITGB4	1.43669	3.24146e-06	1.6178e-05		ENSSSCG00000007181	1.58967	0.0001038	0.000421852
	LARP6	1.31678	3.24979e-06	1.62111e-05		ENSSSCG00000051747	2.20578	0.000103834	0.000421882
	SNAP25	1.35305	3.2518e-06	1.62124e-05		ENSSSCG00000060622	1.3399	0.000103894	0.000422017
	TMC3	2.53243	3.28561e-06	1.63555e-05		ENSSSCG00000054600	2.79327	0.000104208	0.000423064
	CYB5R3	1.06115	3.32178e-06	1.65304e-05		C3	1.26565	0.000104513	0.000424104
	ENSSSCG00000057198	1.60061	3.38494e-06	1.68186e-05		ENSSSCG00000031242	2.08656	0.000104815	0.000425064
	MAMLD1	2.38515	3.45592e-06	1.71429e-05		SLC18A3	2.64904	0.000106487	0.000431134
	ZNF316	1.42101	3.45939e-06	1.71512e-05		FMO2	2.94661	0.000107713	0.000435435
	RHOJ	1.15942	3.47566e-06	1.72171e-05		ENSSSCG00000008661	6.43359	0.00011024	0.000444421
	HPCAL1	1.47265	3.52462e-06	1.74422e-05		CSRNP1	1.40179	0.000110801	0.000446345
	KCNK1	1.43462	3.58851e-06	1.77146e-05		ENSSSCG00000044044	1.12651	0.000111529	0.000448602
	NOVA2	2.36596	3.59197e-06	1.77262e-05		ICA1L	2.24119	0.000113635	0.000455475
	KRT17	3.8019	3.66007e-06	1.804e-05		STX11	1.2832	0.000114011	0.000456529
	GNAZ	1.4424	3.66451e-06	1.80508e-05		ANKRD35	1.83014	0.00011443	0.000457747
	RELT	1.8692	3.70065e-06	1.82008e-05		MVD	1.30156	0.000114707	0.000458513
	FAIM2	1.23106	3.72591e-06	1.83082e-05		TMED4	1.01918	0.00011562	0.000461819
	ENSSSCG00000002749	4.09435	3.78515e-06	1.85822e-05		DHX35	1.02029	0.000115844	0.000462599
	GGN	2.2018	3.79361e-06	1.8618e-05		ZC3HAV1L	1.87017	0.000116428	0.000464697
	ANKRD13B	1.64227	3.81577e-06	1.87153e-05		MSI1	1.49139	0.000117416	0.000468293
	DOCK3	1.96619	3.8512e-06	1.88775e-05		SPTBN2	1.12817	0.000117716	0.000469255
	AMELY	4.1616	3.87446e-06	1.89857e-05		CLK3	1.02995	0.000118339	0.00047139
	ADAMTS8	1.85189	3.90684e-06	1.91326e-05		WHRN	2.25031	0.000119711	0.000476028
	ENSSSCG00000029752	1.65697	3.91359e-06	1.91599e-05		OLFM4	1.3356	0.000119983	0.000476991
	SACS	1.22991	3.96793e-06	1.94021e-05		ENSSSCG00000049732	1.37982	0.000120074	0.000477235
	CIRBP	1.46621	4.00494e-06	1.95712e-05		FDPS	1.30007	0.000120156	0.00047744
	CECR2	1.45555	4.01611e-06	1.96198e-05		MAPRE3	2.24042	0.000120449	0.000478485
	GFOD1	2.01408	4.04441e-06	1.9752e-05		KLHL35	2.06079	0.000121217	0.000480703
	ANKRD35	2.18923	4.04968e-06	1.97717e-05		ENSSSCG00000004830	1.45232	0.000122582	0.000485727
	STK40	1.12059	4.0524e-06	1.97789e-05		ENSSSCG00000048201	1.85629	0.000123676	0.000489128
	KCTD3	1.04036	4.08065e-06	1.99047e-05		CACNB2	1.03837	0.000127055	0.000501623
	PLSCR4	1.04064	4.09036e-06	1.9946e-05		ENSSSCG00000028635	1.07816	0.00013	0.000512369
	SV2C	1.86264	4.11852e-06	2.00772e-05		ENSSSCG00000027013	2.31879	0.000131044	0.000515976
	ENSSSCG00000045808	1.13166	4.18487e-06	2.03634e-05		GMPPB	1.15554	0.000131453	0.000517209
	KIRREL3	2.25642	4.21887e-06	2.04977e-05		IGSF9B	1.64085	0.000132591	0.000521045
	PHF19	1.33345	4.22515e-06	2.0522e-05		HAS3	1.24235	0.000133782	0.000525471
	ENSSSCG00000045084	1.85588	4.24518e-06	2.0613e-05		DLG5	1.04393	0.000133842	0.000525577
	ENSSSCG00000051213	1.72027	4.26934e-06	2.07115e-05		CDHR4	2.01034	0.000133894	0.000525652
	POLR3H	1.90854	4.3003e-06	2.08419e-05		ARHGAP39	1.3978	0.000134977	0.000529219
	MTSS1	1.04585	4.30143e-06	2.08419e-05		TMC6	1.22904	0.000134991	0.000529219
	FAM102A	1.22186	4.30478e-06	2.08518e-05		MREG	1.05502	0.000136031	0.000532997
	AIMP2	2.26918	4.3188e-06	2.09134e-05		SFMBT2	1.35734	0.000137092	0.000536633
	HSD11B2	1.57802	4.34333e-06	2.10194e-05		HSH2D	1.38063	0.000137407	0.000537603
	COQ6	1.00018	4.3542e-06	2.10657e-05		VAMP2	1.16279	0.000139029	0.000542892
	ARL15	1.1062	4.39816e-06	2.1272e-05		SLC45A3	1.01437	0.000139092	0.000543004
	ENSSSCG00000050345	2.87353	4.53194e-06	2.18925e-05		ADSL	1.17489	0.000139359	0.000543912
	HSPG2	1.2932	4.60353e-06	2.2225e-05		GJB3	3.73349	0.000141849	0.000552693
	NCLN	1.04735	4.63229e-06	2.23571e-05		ENSSSCG00000041731	1.03385	0.000145561	0.000565508
	IHO1	1.59189	4.67055e-06	2.25349e-05		MAP2K7	1.00886	0.000145795	0.000566141
	ERC2	1.39295	4.7801e-06	2.30357e-05		UCMA	4.03143	0.000146687	0.000569191
	ARMC9	1.2756	4.83126e-06	2.32333e-05		ENSSSCG00000030977	3.5407	0.000147391	0.000571647
	ENSSSCG00000047701	2.36231	4.85831e-06	2.33424e-05		BCL3	1.39456	0.000147484	0.000571856
	COL5A3	1.72842	4.86521e-06	2.33685e-05		CLBA1	1.67162	0.000147961	0.00057307
	SPRY4	1.73009	4.9888e-06	2.39262e-05		ENSSSCG00000047268	2.03215	0.000149355	0.000578286
	BBC3	1.57849	5.09719e-06	2.44095e-05		ENSSSCG00000021656	1.31195	0.000153543	0.000593116
	TTC7A	1.08851	5.16844e-06	2.47359e-05		HDDC2	1.06631	0.000156569	0.000603161
	URB2	1.47431	5.2209e-06	2.49571e-05		CBR3	2.05626	0.000161027	0.000619297
	SLC5A5	5.13308	5.23939e-06	2.5038e-05		ENSSSCG00000051789	1.02656	0.0001611	0.000619427
	NCF2	1.81589	5.26305e-06	2.51361e-05		ENSSSCG00000058360	2.31051	0.000162745	0.000625454
	SYN1	2.40799	5.31335e-06	2.53536e-05		ENSSSCG00000056650	1.42314	0.000163596	0.000628422
	CCL21	1.6457	5.3665e-06	2.55844e-05		C17orf49	1.14579	0.000165678	0.000635508
	CLEC2B	1.37958	5.37873e-06	2.56274e-05		OASL	3.22267	0.000167513	0.000641781
	ENSSSCG00000046252	2.41013	5.4007e-06	2.57245e-05		NLGN3	2.05019	0.000167834	0.000642857
	WDR24	1.08355	5.43543e-06	2.58821e-05		JPH4	1.61268	0.00016908	0.000647321
	ENSSSCG00000014178	6.64162	5.53117e-06	2.63146e-05		ENSSSCG00000000887	1.47052	0.000170901	0.000653823
	ENSSSCG00000051705	1.74586	5.53823e-06	2.63403e-05		ENSSSCG00000013556	2.00551	0.000172284	0.000658329
	SEMA6B	1.73616	5.57632e-06	2.65057e-05		MRPL18	1.48702	0.000172915	0.000660425
	ENSSSCG00000059243	1.81671	5.58557e-06	2.6534e-05		SLC22A15	1.22923	0.000173305	0.000661601
	FOSB	3.60729	5.60262e-06	2.66071e-05		FAM53C	1.05508	0.000176756	0.000673976
	ACACB	1.72166	5.66542e-06	2.68813e-05		ENSSSCG00000060679	1.01899	0.000177575	0.000676453
	GPR19	1.13044	5.81174e-06	2.75023e-05		PDZRN4	1.29619	0.000179064	0.000681316
	BRAT1	1.25447	5.8464e-06	2.76499e-05		HENMT1	2.39929	0.000179466	0.000682522
	SLA	1.33434	5.90602e-06	2.78967e-05		ENSSSCG00000048818	2.92454	0.000180065	0.000684641
	TCOF1	1.52451	5.90839e-06	2.78967e-05		BCL7B	1.11813	0.000184037	0.000698916
	ENSSSCG00000035026	5.10431	5.91372e-06	2.79106e-05		SNAP25	1.26135	0.000184438	0.00070027
	XRCC2	1.93184	5.96771e-06	2.81571e-05		GUCA1A	2.71856	0.000186318	0.000707075
	MAP4K4	1.23634	6.03778e-06	2.84709e-05		RPP25	1.9904	0.000186486	0.00070751
	TSPAN7	1.02697	6.05417e-06	2.85398e-05		CCDC138	1.37743	0.000186634	0.00070761
	BOP1	1.15646	6.08323e-06	2.86684e-05		ENSSSCG00000031177	2.95685	0.000186636	0.00070761
	ENSSSCG00000053589	1.49866	6.08731e-06	2.86791e-05		ENSSSCG00000035363	2.7573	0.000187386	0.000710119
	MDGA1	1.94859	6.15353e-06	2.89655e-05		ENSSSCG00000048110	1.11035	0.00018762	0.000710839
	PLEKHH2	1.35153	6.16875e-06	2.90287e-05		OSR2	3.19843	0.000188697	0.000714749
	CD37	2.38438	6.18509e-06	2.90885e-05		CHRD	1.79	0.000190417	0.000720416
	ENSSSCG00000062035	1.79389	6.25995e-06	2.94319e-05		RGMA	1.16047	0.000196297	0.000741088
	KLHL35	2.31435	6.29448e-06	2.95768e-05		ENSSSCG00000040236	1.25465	0.000197534	0.000745586
	ENSSSCG00000020888	3.87492	6.40202e-06	3.00469e-05		GALR1	1.35162	0.000198576	0.000748638
	ENSSSCG00000009422	1.28806	6.4707e-06	3.03514e-05		GPC3	1.49514	0.000201259	0.000758039
	REELD1	4.04561	6.47869e-06	3.038e-05		INAVA	1.00306	0.000205836	0.000774187
	CDH5	1.10983	6.49246e-06	3.04357e-05		HAS2	3.37509	0.000207302	0.000779154
	MARS1	1.29571	6.50514e-06	3.04862e-05		PRPSAP1	1.29834	0.000212223	0.000795972
	MARVELD1	1.50772	6.51243e-06	3.05114e-05		HSPBP1	1.36497	0.000217372	0.000812816
	S1PR1	1.1303	6.51624e-06	3.05203e-05		LGALS3BP	1.01211	0.000218216	0.000815021
	ESRP2	1.3014	6.57234e-06	3.07471e-05		ENSSSCG00000047643	1.37786	0.000222432	0.000829032
	ENSSSCG00000043805	3.37063	6.61592e-06	3.0942e-05		ENSSSCG00000011147	3.57363	0.000224442	0.000835942
	ZHX2	1.44298	6.6204e-06	3.09448e-05		ENSSSCG00000041254	1.63641	0.000230959	0.000859018
	GLDC	1.9326	6.80174e-06	3.17368e-05		FBXL15	1.15389	0.000231857	0.00086216
	HLX	1.45668	6.87284e-06	3.20219e-05		UCHL1	1.12229	0.000239346	0.000886515
	ACKR2	1.38884	6.87803e-06	3.20368e-05		C6orf132	1.08508	0.000239596	0.000887234
	ENSSSCG00000044842	2.82004	6.89001e-06	3.20739e-05		TBX1	1.1192	0.000239955	0.000888359
	CNR1	1.63395	6.99072e-06	3.25144e-05		ADGRB3	1.58358	0.000242312	0.000895847
	FAM131B	1.80299	7.07283e-06	3.28783e-05		KIF5A	1.12854	0.000247438	0.000913324
	HILPDA	1.4736	7.11004e-06	3.30309e-05		HARBI1	1.10749	0.000250339	0.000923182
	POLA1	1.00189	7.1321e-06	3.31238e-05		NDRG2	1.20684	0.000252308	0.000929743
	ENSSSCG00000013078	1.42523	7.1452e-06	3.3175e-05		PRDM15	1.03117	0.000252509	0.000929901
	SLC6A17	2.27758	7.18004e-06	3.32981e-05		CXXC4	1.34139	0.000253444	0.000932705
	RBM28	1.11443	7.19534e-06	3.33595e-05		SRRD	1.26741	0.00025524	0.000938668
	ZNF618	1.54621	7.20228e-06	3.33819e-05		H2AC12	1.13758	0.000255953	0.000940859
	SRSF12	1.30031	7.23069e-06	3.35039e-05		GPR19	1.02681	0.000256409	0.000942013
	CKS1B	1.25743	7.28188e-06	3.37119e-05		ENSSSCG00000055618	1.46341	0.000258372	0.000948882
	CCL4	2.76783	7.29318e-06	3.37465e-05		ENSSSCG00000037426	1.94919	0.000258475	0.000949041
	RAC1	1.08574	7.33953e-06	3.39395e-05		PHYKPL	1.22268	0.000259067	0.000950782
	ENSSSCG00000043522	1.86772	7.3771e-06	3.41034e-05		SLC9A5	2.21118	0.000259312	0.000951463
	PRR7	3.45617	7.50066e-06	3.46546e-05		FRMD5	1.18185	0.000259797	0.000952807
	NGFR	1.61711	7.52869e-06	3.4774e-05		DPP6	2.2376	0.000260768	0.000955712
	SNIP1	1.15222	7.78415e-06	3.58608e-05		ENSSSCG00000063415	2.52659	0.000262787	0.000962233
	RASAL1	2.18337	7.79042e-06	3.58794e-05		USP44	1.939	0.000263199	0.000963473
	ALDH1A2	2.24943	7.87583e-06	3.62519e-05		ENSSSCG00000041479	2.47863	0.000264456	0.000967462
	TRPC4	1.21744	7.87919e-06	3.6257e-05		RIMS4	1.52734	0.000265204	0.000969978
	SIPA1L3	1.14833	7.90563e-06	3.63577e-05		GCNT7	1.61211	0.000271664	0.000990377
	RIN3	1.09822	7.93282e-06	3.64618e-05		DHRS13	1.04107	0.000276659	0.00100591
	ENSSSCG00000042640	1.7565	7.93829e-06	3.64765e-05		ENSSSCG00000057014	2.54226	0.000277896	0.00100995
	FIGNL1	1.56401	8.03104e-06	3.68815e-05		MOCS1	1.28309	0.000280071	0.0010174
	DENND2B	1.41613	8.11051e-06	3.72251e-05		SYT13	1.05737	0.000281362	0.00102163
	CMYA5	1.47763	8.12876e-06	3.72982e-05		HYOU1	1.08636	0.000282216	0.00102449
	EGR3	4.11073	8.17033e-06	3.74502e-05		TMEM238L	1.71794	0.000286887	0.00104004
	ORC6	1.33241	8.17527e-06	3.74502e-05		WDR38	2.30535	0.000288649	0.00104572
	ENSSSCG00000055207	2.55743	8.1705e-06	3.74502e-05		COL6A1	1.01383	0.000290744	0.00105259
	ENSSSCG00000042357	2.83583	8.19062e-06	3.75068e-05		P2RX2	2.3364	0.000294947	0.00106661
	ENSSSCG00000006008	2.14715	8.26696e-06	3.78347e-05		PLPPR5	1.36139	0.000297161	0.00107351
	TMEM171	1.28842	8.30907e-06	3.79948e-05		KCNH8	1.53321	0.000298932	0.00107932
	PHEX	1.60409	8.42606e-06	3.84858e-05		ENSSSCG00000058119	1.21209	0.000304066	0.00109637
	ENSSSCG00000056769	2.51679	8.51322e-06	3.87954e-05		ENSSSCG00000013078	1.01189	0.000309612	0.00111487
	ACOD1	5.04795	8.55159e-06	3.89484e-05		NTRK3	2.01811	0.000310106	0.00111623
	ENSSSCG00000037735	3.22711	8.55947e-06	3.89729e-05		ENSSSCG00000006050	1.94868	0.000310444	0.00111711
	PDZRN3	1.27269	8.57832e-06	3.90476e-05		FAM20A	1.46506	0.000316198	0.00113578
	CHST11	1.81953	8.58141e-06	3.90505e-05		MX2	1.38285	0.000317029	0.00113851
	MRPL55	1.18703	8.62436e-06	3.92348e-05		YDJC	1.63896	0.000320851	0.00115121
	ENPP6	1.79681	8.82624e-06	4.00849e-05		ENSSSCG00000053589	1.04529	0.000322842	0.00115809
	KRT4	4.40071	8.87543e-06	4.0274e-05		PRSS22	2.0436	0.000331848	0.00118839
	ENSSSCG00000054928	1.68173	8.88619e-06	4.03e-05		BATF2	1.68421	0.000332209	0.00118903
	MINDY4	1.21281	8.89807e-06	4.03425e-05		MUC2	1.03434	0.000332656	0.00119037
	VIPR1	1.20898	9.00843e-06	4.07735e-05		NFASC	1.88344	0.000332907	0.001191
	ENSSSCG00000041250	1.76827	9.09494e-06	4.11302e-05		ENSSSCG00000058234	3.1525	0.000334956	0.0011978
	SEC16A	1.03887	9.15431e-06	4.13286e-05		EREG	1.41285	0.000337317	0.00120543
	RXRA	1.13003	9.25187e-06	4.17455e-05		SLC5A7	1.70988	0.000344301	0.00122738
	MCM3	1.26826	9.28551e-06	4.18737e-05		ENSSSCG00000021374	1.38316	0.000345095	0.00122967
	ADCY4	1.25624	9.34001e-06	4.20721e-05		UBA7	1.20557	0.000346007	0.0012321
	IGF1R	1.22478	9.34673e-06	4.20832e-05		ENSSSCG00000051765	1.51483	0.000346882	0.00123467
	NPR2	1.32225	9.43909e-06	4.24825e-05		TXNL4B	1.07716	0.000349616	0.00124357
	ENSSSCG00000040236	1.56726	9.60277e-06	4.31585e-05		PCOLCE2	1.2226	0.000367681	0.00130234
	BAHCC1	1.23928	9.6546e-06	4.33576e-05		ENSSSCG00000060411	3.83359	0.000369482	0.00130728
	ENSSSCG00000050876	1.66116	9.65519e-06	4.33576e-05		SLCO4A1	1.45802	0.000377466	0.00133171
	ENSSSCG00000037426	2.23334	9.78574e-06	4.39069e-05		SHF	1.42791	0.000378433	0.00133454
	AP1S3	1.59172	9.83113e-06	4.40735e-05		ENSSSCG00000034715	1.07654	0.000380692	0.00134191
	C9orf152	1.37116	9.84792e-06	4.41364e-05		ZC3H12A	1.52201	0.000382552	0.00134817
	C1orf116	2.16562	9.9976e-06	4.47697e-05		CMPK2	1.26601	0.000384308	0.00135377
	GTF3C1	1.02487	1.00661e-05	4.50386e-05		ENSSSCG00000056166	2.75079	0.000391055	0.00137542
	ANKS6	1.14388	1.01217e-05	4.52497e-05		PRAM1	1.30595	0.000393186	0.00138231
	KCNH1	1.94838	1.02769e-05	4.58919e-05		GNG4	1.59076	0.000393467	0.001383
	TMTC1	1.04639	1.02917e-05	4.59451e-05		UPB1	2.74367	0.00039852	0.00139984
	TMEM52	2.49319	1.03473e-05	4.61678e-05		XKR6	1.66853	0.000402182	0.00141133
	ZNRF1	1.51884	1.06139e-05	4.73078e-05		RASL11A	1.69311	0.000402504	0.00141197
	ENSSSCG00000054725	3.77325	1.06457e-05	4.7433e-05		ENSSSCG00000004520	1.68344	0.000409276	0.00143385
	ACO1	1.09038	1.0676e-05	4.7555e-05		ITIH3	1.27485	0.000410641	0.00143801
	CNKSR3	1.37839	1.07135e-05	4.77086e-05		LTBP3	1.16576	0.000414929	0.00145112
	SCN2A	1.82964	1.07974e-05	4.8042e-05		TOP3A	1.0717	0.000420315	0.00146772
	TMEM107	2.24854	1.08041e-05	4.80586e-05		ENSSSCG00000000703	1.41483	0.000425958	0.00148535
	ENSSSCG00000040146	6.32181	1.08754e-05	4.83487e-05		ATP4B	5.01835	0.000426452	0.00148656
	ENSSSCG00000011569	1.07032	1.10179e-05	4.89008e-05		WDR4	1.31311	0.000428041	0.00149145
	TBC1D2B	1.03985	1.10177e-05	4.89008e-05		SAMD10	1.49325	0.000429173	0.00149507
	AQP5	6.39251	1.11351e-05	4.93801e-05		CCDC38	1.41694	0.00043701	0.00151941
	FNDC9	2.42704	1.15362e-05	5.10599e-05		SNRNP70	1.00811	0.000441424	0.00153309
	ENSSSCG00000015011	1.24803	1.17261e-05	5.18716e-05		ENSSSCG00000032623	1.12411	0.000441888	0.00153414
	KMT5C	1.16935	1.17764e-05	5.20653e-05		ADCY1	1.2185	0.000445424	0.00154498
	APLP1	1.49615	1.17957e-05	5.21363e-05		SYCE1	1.13399	0.000449831	0.00155858
	FGG	8.3462	1.19518e-05	5.27678e-05		ENSSSCG00000044253	1.35641	0.000455499	0.00157686
	ENSSSCG00000058898	2.54142	1.20557e-05	5.31974e-05		ENSSSCG00000052903	1.52863	0.000458859	0.00158609
	FAM89B	1.12458	1.21255e-05	5.34759e-05		ENSSSCG00000044304	1.71177	0.000461377	0.00159445
	ARID5A	1.24751	1.21599e-05	5.3583e-05		CDH22	2.32798	0.000470907	0.00162215
	ENSSSCG00000035363	2.90089	1.21591e-05	5.3583e-05		ENSSSCG00000057498	1.96415	0.00047142	0.00162322
	DAXX	1.29683	1.21799e-05	5.36568e-05		C11orf71	1.11448	0.000471761	0.00162404
	NPTXR	2.15478	1.22213e-05	5.37945e-05		ENSSSCG00000034610	1.49599	0.000479114	0.00164477
	ENSSSCG00000050792	1.37186	1.23192e-05	5.41362e-05		BHLHA15	1.55424	0.000483457	0.00165861
	SLC25A47	2.74778	1.25829e-05	5.52646e-05		TMEM47	1.19101	0.000485666	0.00166502
	PMP22	1.73786	1.25997e-05	5.53232e-05		GAL	2.32784	0.000491576	0.00168467
	DUSP26	2.02001	1.26532e-05	5.55278e-05		CDKN1C	1.08931	0.000494696	0.00169464
	H2AX	1.54053	1.28659e-05	5.63995e-05		ADGRG3	2.10575	0.000499192	0.00170822
	FOXF1	1.11682	1.28917e-05	5.64814e-05		SSX2IP	1.02657	0.000502861	0.00172004
	ATN1	1.318	1.31037e-05	5.73634e-05		ENSSSCG00000031644	2.1961	0.000503202	0.00172047
	BLVRB	1.48546	1.31855e-05	5.76898e-05		ENSSSCG00000054113	2.23386	0.000506201	0.00172925
	SLC13A5	2.02339	1.33316e-05	5.82972e-05		ADAT3	1.82479	0.000506466	0.00172979
	TMC8	2.17997	1.3339e-05	5.83133e-05		SIGLEC1	1.50188	0.000517342	0.00176393
	FBN3	2.16059	1.34097e-05	5.85905e-05		PTDSS2	1.05274	0.000523647	0.00178316
	ENSSSCG00000054992	1.42995	1.35433e-05	5.91257e-05		RRS1	1.11869	0.000524348	0.00178516
	KLC1	1.23124	1.3655e-05	5.95677e-05		SGF29	1.55514	0.000532418	0.00180995
	TRIM56	1.01585	1.36604e-05	5.95723e-05		ENSSSCG00000003476	2.51849	0.00053551	0.00181853
	DNM1	1.85951	1.36678e-05	5.95882e-05		MAP1LC3A	1.21239	0.000539502	0.0018317
	ENSSSCG00000012565	4.53848	1.38356e-05	6.02871e-05		SIDT1	1.31857	0.000543281	0.00184337
	CD248	1.74049	1.38949e-05	6.05124e-05		PNKD	1.37936	0.000569175	0.00192067
	ENSSSCG00000041783	1.13623	1.38938e-05	6.05124e-05		PLA2G2D	4.24527	0.000580416	0.0019549
	SUSD5	1.95729	1.40434e-05	6.11094e-05		ENSSSCG00000043019	3.52181	0.000581994	0.00195898
	SLC41A3	1.79425	1.40499e-05	6.11209e-05		NPTX1	1.43486	0.000588505	0.00198007
	ENSSSCG00000058754	4.52441	1.43091e-05	6.21808e-05		RTKN2	1.07658	0.000605696	0.00202982
	ADAMTS7	1.28214	1.44205e-05	6.26308e-05		ENSSSCG00000044600	2.66516	0.000608542	0.00203893
	RFX1	1.21208	1.45615e-05	6.32091e-05		ENSSSCG00000051128	1.55284	0.000611249	0.00204672
	BCAM	1.37207	1.45704e-05	6.32176e-05		SLIT1	2.07988	0.000613531	0.00205351
	RPL28	1.19012	1.46697e-05	6.36099e-05		LTF	4.70156	0.000620757	0.00207553
	CASZ1	1.26536	1.47063e-05	6.37341e-05		CXCR6	1.66185	0.000632513	0.00211219
	MORN3	4.90356	1.48045e-05	6.40554e-05		SYNGR3	1.3582	0.000650039	0.00216621
	ENSSSCG00000052847	1.9324	1.47975e-05	6.40554e-05		CIART	1.55487	0.000661794	0.00220081
	ENSSSCG00000050056	3.60049	1.49694e-05	6.4699e-05		ENSSSCG00000053593	2.75692	0.000668191	0.00221887
	RASL11B	1.42542	1.51774e-05	6.55274e-05		E2F7	1.17805	0.000671056	0.00222746
	ENSSSCG00000057014	2.86349	1.52271e-05	6.57063e-05		SMIM33	2.62967	0.00067853	0.00224994
	CRHR1	4.39337	1.52624e-05	6.5841e-05		CDC6	1.22683	0.000696149	0.00229981
	SYNGR3	1.52163	1.53021e-05	6.59886e-05		BSN	1.73001	0.000697167	0.0023027
	RAB36	2.25073	1.53169e-05	6.60171e-05		ENSSSCG00000044626	1.25231	0.000706884	0.00233125
	SP5	1.43037	1.53499e-05	6.61293e-05		HAUS5	1.00541	0.000712301	0.00234786
	E2F7	1.45014	1.54241e-05	6.64132e-05		C21orf62	1.92838	0.000715797	0.00235841
	ENSSSCG00000060851	1.27771	1.54717e-05	6.66005e-05		SV2B	2.52711	0.000716473	0.00236016
	ENSSSCG00000009281	1.50969	1.54948e-05	6.6682e-05		IL2RG	1.12718	0.000716948	0.00236124
	SLC25A24	1.65045	1.55801e-05	6.6995e-05		C5	1.35659	0.000720199	0.00237048
	TMEM63C	2.54621	1.56441e-05	6.72519e-05		CSTPP1	1.51485	0.000722953	0.00237808
	UCHL1	1.29856	1.56942e-05	6.74493e-05		ENSSSCG00000053199	1.05704	0.000723847	0.00238054
	SH2D2A	1.71406	1.57952e-05	6.78289e-05		DDIAS	1.13428	0.000729506	0.00239718
	ENSSSCG00000058245	2.2272	1.58222e-05	6.79266e-05		ENSSSCG00000050056	2.93088	0.00073756	0.00242018
	METTL21C	1.71428	1.5892e-05	6.81896e-05		ENSSSCG00000050345	2.41978	0.000739358	0.00242509
	SPATA46	2.70306	1.60243e-05	6.86834e-05		ANXA4	1.02796	0.000753767	0.00246781
	RNF26	1.03108	1.61469e-05	6.91721e-05		ENSSSCG00000046709	1.03887	0.000761807	0.00249362
	ERCC2	1.03407	1.61645e-05	6.92287e-05		ENSSSCG00000057198	1.16056	0.000762425	0.00249514
	ENSSSCG00000044405	1.7187	1.61912e-05	6.93071e-05		COQ10A	1.7909	0.000766608	0.0025074
	AXIN1	1.07278	1.64049e-05	7.01646e-05		GPR173	1.03935	0.000769008	0.00251463
	ENSSSCG00000047248	2.13971	1.64707e-05	7.04082e-05		ENSSSCG00000056658	4.64715	0.000787705	0.00256792
	RFLNA	2.16469	1.66011e-05	7.09089e-05		ENSSSCG00000044753	5.06797	0.000794414	0.00258874
	KCNC2	2.11208	1.6733e-05	7.14213e-05		C15orf61	1.19261	0.00080167	0.00261027
	CFAP157	1.86427	1.67344e-05	7.14213e-05		LENG9	1.07013	0.000805571	0.00262137
	TNIP1	1.14602	1.67997e-05	7.16618e-05		TTLL11	2.35497	0.000810195	0.00263375
	PITPNM2	1.10851	1.71179e-05	7.29373e-05		IL17D	1.32528	0.000817365	0.00265544
	PRDM11	1.03043	1.72021e-05	7.32222e-05		FPGS	1.26721	0.00081799	0.00265649
	ATG9A	1.02447	1.72358e-05	7.33462e-05		CATSPERB	2.52493	0.000820285	0.00266331
	DUS1L	1.23448	1.72423e-05	7.33544e-05		ENSSSCG00000009281	1.57009	0.000820472	0.00266338
	KCNH8	1.42597	1.73937e-05	7.39197e-05		KIF5C	1.20504	0.000822981	0.00266989
	GNG4	1.65575	1.74943e-05	7.43077e-05		ENSSSCG00000013714	4.65763	0.000837611	0.00271243
	GABBR2	3.34166	1.75289e-05	7.44352e-05		RHEBL1	2.19341	0.000840785	0.00272107
	ENSSSCG00000021675	2.14398	1.75608e-05	7.45119e-05		ENSSSCG00000021676	2.07654	0.000846677	0.00273848
	ENSSSCG00000037422	6.53303	1.7846e-05	7.56012e-05		ENSSSCG00000057214	1.2167	0.000853804	0.00276027
	INSYN2A	1.81025	1.78631e-05	7.56537e-05		ISM1	1.52396	0.000856096	0.0027656
	FRMD5	1.52682	1.8165e-05	7.68304e-05		ENSSSCG00000055162	1.07993	0.000861345	0.0027803
	TRNP1	1.59481	1.82718e-05	7.72415e-05		ENSSSCG00000060149	4.30118	0.0008618	0.00278067
	ARHGAP9	1.79214	1.8322e-05	7.74332e-05		C9orf131	1.80265	0.000864273	0.00278752
	CDC6	1.31305	1.83767e-05	7.76439e-05		TNFSF14	1.51629	0.000874936	0.00282078
	ENSSSCG00000041502	1.67851	1.84204e-05	7.7808e-05		MLPH	1.64348	0.000881314	0.00283849
	ENSSSCG00000046700	1.85139	1.8478e-05	7.80307e-05		ENSSSCG00000062427	1.58845	0.00088628	0.00285391
	MAP3K6	1.0657	1.84987e-05	7.80769e-05		LRFN4	1.43476	0.00090754	0.00291652
	ENSSSCG00000043838	2.96167	1.85349e-05	7.8168e-05		MAPK10	1.0093	0.000934728	0.00299609
	ENSSSCG00000050754	2.64284	1.85593e-05	7.82503e-05		ARMC9	1.0104	0.000936452	0.00300102
	ENSSSCG00000011344	1.93348	1.87301e-05	7.89496e-05		FGF10	1.26225	0.000960323	0.00306894
	SLC1A2	1.75282	1.87376e-05	7.89604e-05		TNFAIP2	1.00377	0.000972572	0.003105
	ENSSSCG00000048573	6.39598	1.87598e-05	7.90332e-05		AARD	3.27531	0.000980809	0.0031288
	CACNB2	1.18235	1.87743e-05	7.90733e-05		ENSSSCG00000048573	6.39267	0.000986796	0.00314665
	NDRG1	1.40584	1.89345e-05	7.9727e-05		CMYA5	1.29424	0.000991085	0.00315844
	MMRN2	1.36634	1.89722e-05	7.98647e-05		TMEM145	2.10945	0.00100427	0.00319845
	ENSSSCG00000041316	1.22062	1.90303e-05	8.00672e-05		PHF24	2.06568	0.00101938	0.00324091
	CYTH1	1.64732	1.93489e-05	8.13437e-05		F13B	1.54214	0.00102262	0.00324964
	PLEKHH3	1.78134	1.96793e-05	8.26258e-05		MRPS7	1.19346	0.00102274	0.00324964
	METAP1D	1.35448	1.9897e-05	8.3407e-05		ENSSSCG00000058149	1.67531	0.00102335	0.00325095
	ENSSSCG00000047908	3.83054	2.03027e-05	8.50855e-05		ENSSSCG00000039956	2.06037	0.00102766	0.00326268
	GTSE1	1.43362	2.07492e-05	8.682e-05		TRIM9	1.80297	0.00103198	0.00327316
	NAV2	1.72499	2.08669e-05	8.72899e-05		DYRK4	1.71921	0.00104014	0.00329451
	LYZ	1.36175	2.08756e-05	8.73034e-05		ENSSSCG00000031155	1.34491	0.00104069	0.00329559
	TNK1	1.09271	2.09421e-05	8.75359e-05		ENSSSCG00000051327	1.51798	0.00104135	0.00329701
	TNFRSF12A	2.0579	2.11066e-05	8.81314e-05		DOK3	1.47288	0.00104267	0.00330035
	PALM	1.33227	2.12052e-05	8.84738e-05		ENSSSCG00000042942	1.69595	0.00104789	0.00331511
	KLF9	1.38919	2.123e-05	8.85543e-05		GPR27	1.06433	0.00105653	0.00334049
	TP53BP2	1.08189	2.13283e-05	8.89178e-05		MCM10	1.00931	0.00106042	0.00335211
	PHC1	1.17678	2.14191e-05	8.9231e-05		GPR158	2.33116	0.00107057	0.00337953
	ENSSSCG00000057517	3.06033	2.14487e-05	8.93268e-05		PTPRN2	1.0102	0.00109039	0.00343669
	ENSSSCG00000003048	6.5013	2.14738e-05	8.94079e-05		F5	1.04322	0.00109411	0.00344706
	FAM83B	1.16683	2.15565e-05	8.9729e-05		BLCAP	1.06433	0.00109837	0.00345779
	ENSSSCG00000058360	2.66221	2.15739e-05	8.9755e-05		ENSSSCG00000047502	1.03437	0.00110515	0.00347843
	ENSSSCG00000045661	1.95277	2.16602e-05	9.00906e-05		EFCAB9	3.07592	0.00111313	0.00349942
	FGFR1	1.53567	2.1671e-05	9.01118e-05		CSF2	2.71741	0.00111696	0.00350871
	ENSSSCG00000051640	2.47664	2.17273e-05	9.02992e-05		ADORA2B	2.20542	0.00113331	0.0035552
	KLHL21	1.17259	2.18112e-05	9.05775e-05		SLC27A3	1.39998	0.00113925	0.00357247
	PLXNA1	1.05534	2.18261e-05	9.06158e-05		ENSSSCG00000047895	1.16343	0.00117216	0.00366278
	PLCD3	1.70538	2.19856e-05	9.1207e-05		CDC42EP1	1.02757	0.00119399	0.00372198
	ARHGAP23	1.87776	2.21998e-05	9.2e-05		ENSSSCG00000050753	1.83392	0.00121023	0.00376706
	GPR161	1.03509	2.23011e-05	9.23722e-05		ENSSSCG00000004355	4.04727	0.00122221	0.00379921
	FBXW8	1.00434	2.23005e-05	9.23722e-05		NEUROG3	1.29102	0.00123493	0.00383279
	IL2RG	1.85255	2.23293e-05	9.24493e-05		TMEM262	1.11916	0.0012379	0.00384126
	CXCR4	2.10534	2.24243e-05	9.28102e-05		ENSSSCG00000053814	4.18992	0.00124802	0.00386819
	MAP1A	1.40518	2.25821e-05	9.34152e-05		ATCAY	1.2517	0.00125937	0.00389883
	PTX3	2.64858	2.28388e-05	9.44038e-05		ENSSSCG00000043201	1.81404	0.0012592	0.00389883
	ENSSSCG00000050098	2.26739	2.30187e-05	9.50495e-05		SYT16	1.31343	0.00126679	0.00391955
	PSPC1	1.05915	2.30758e-05	9.52607e-05		TRPV5	1.677	0.00132545	0.00408451
	PTGIR	1.95414	2.33807e-05	9.63702e-05		GABRB3	2.08401	0.00132911	0.00409423
	LIPG	3.59131	2.37317e-05	9.76409e-05		ENSSSCG00000003248	1.64379	0.00135717	0.00416705
	CCN1	2.41133	2.42796e-05	9.97159e-05		PNP	1.26689	0.00135761	0.0041676
	IGFBP3	1.39965	2.43536e-05	9.99941e-05		FBXO16	1.07758	0.00135886	0.00417066
	FGF22	2.74032	2.45805e-05	0.000100822		FBXO41	1.62168	0.00137484	0.00421647
	DHX38	1.11462	2.46525e-05	0.000101092		ENSSSCG00000063274	1.41949	0.0013846	0.00423993
	LRCH4	1.26765	2.47006e-05	0.000101263		CCL4	2.2682	0.00138585	0.00424213
	ADAMTSL4	1.70062	2.49041e-05	0.000101993		SPTLC3	1.30825	0.00139503	0.00426778
	BCOR	1.17272	2.51504e-05	0.000102896		ZNF526	1.29591	0.00140076	0.00428369
	ENSSSCG00000039020	4.22396	2.55288e-05	0.000104338		ARHGAP8	1.05477	0.00140464	0.00429229
	ELN	1.47434	2.56168e-05	0.000104671		ENSSSCG00000060636	1.10189	0.00141192	0.00431207
	ENSSSCG00000053721	1.96681	2.5887e-05	0.00010564		EPHA5	1.3542	0.00141626	0.00432367
	PSMA7	1.18587	2.59164e-05	0.000105706		ENSSSCG00000015664	1.10056	0.00145814	0.00443972
	GCNT7	2.04739	2.59916e-05	0.000105959		DUSP26	2.12741	0.00146473	0.00445723
	ATOSB	1.07254	2.63126e-05	0.000107212		SYN1	1.62783	0.00149073	0.00452433
	ENSSSCG00000046388	2.17274	2.63824e-05	0.000107454		ADAMTSL1	1.14331	0.00151487	0.00459327
	PAK4	1.02015	2.68204e-05	0.000109087		ENSSSCG00000004911	4.68931	0.00156033	0.00471953
	POU6F1	1.87768	2.72427e-05	0.000110664		ENSSSCG00000009969	3.45039	0.00156305	0.00472684
	C4orf36	4.61656	2.72598e-05	0.000110706		ENO2	1.03338	0.00157361	0.0047534
	LSS	1.40201	2.72895e-05	0.000110798		CALY	2.31278	0.00158071	0.00477128
	ENSSSCG00000051767	3.40781	2.77783e-05	0.000112668		ENSSSCG00000051098	1.79002	0.00160028	0.00481945
	RORA	1.24514	2.80028e-05	0.000113522		LHFPL4	1.96222	0.00160393	0.0048271
	ENSSSCG00000031800	1.9803	2.80138e-05	0.000113537		GPR37	1.78004	0.00160656	0.00483385
	SLC25A19	1.65515	2.80274e-05	0.000113564		MEGF11	1.00105	0.00164852	0.00494341
	RTEL1	1.09236	2.80422e-05	0.000113595		ENSSSCG00000033457	1.77343	0.00165085	0.00494946
	GPR158	2.33438	2.8135e-05	0.000113913		KCTD7	1.38515	0.00165537	0.00496118
	ENSSSCG00000013880	1.65244	2.83079e-05	0.000114555		MYT1L	2.71486	0.00166761	0.00499039
	ENSSSCG00000043004	2.50667	2.83305e-05	0.000114618		LINGO1	1.40626	0.0016747	0.00500694
	FKBP5	1.21105	2.83635e-05	0.000114694		ENSSSCG00000050377	1.13865	0.00168034	0.00501984
	ENSSSCG00000004839	1.57114	2.84229e-05	0.000114905		ENSSSCG00000060446	2.45107	0.00170915	0.00509663
	ENSSSCG00000053515	4.88199	2.84726e-05	0.000115077		INSYN2A	1.49218	0.0017492	0.00520139
	SNRPA	1.47641	2.87135e-05	0.000115992		RSAD1	1.27054	0.00175879	0.00522236
	CORO6	2.55241	2.87404e-05	0.000116071		ENSSSCG00000002520	1.29823	0.00176076	0.00522725
	P2RX5	2.36881	2.90085e-05	0.000116977		ENSSSCG00000024660	1.52217	0.00180371	0.00533993
	PPIF	1.19867	2.90946e-05	0.000117294		SMIM13	1.39804	0.00185199	0.00547075
	NETO2	1.20048	2.91941e-05	0.000117636		ENSSSCG00000004573	1.80296	0.0018854	0.00555921
	ENSSSCG00000053372	5.35965	2.92877e-05	0.000117924		ENSSSCG00000041442	1.87767	0.00189459	0.00557707
	ENSSSCG00000033880	2.02898	2.93478e-05	0.000118107		KCNA3	1.16528	0.00192069	0.00564461
	NCKAP5L	1.43792	2.95601e-05	0.000118902		DDAH1	1.24995	0.00192235	0.00564843
	CHTF18	1.44346	2.9788e-05	0.000119728		PPL	1.69365	0.00193802	0.00569031
	AARD	4.00847	2.98737e-05	0.000120042		CD177	4.01478	0.00195333	0.00572584
	ENSSSCG00000029449	5.24084	3.00064e-05	0.000120424		ELAVL3	2.14114	0.0019785	0.00579117
	LMOD3	3.24665	3.03117e-05	0.000121619		IFN-ALPHA-9	2.56612	0.00198391	0.00580595
	ACSBG1	1.59428	3.04032e-05	0.000121956		RAI2	1.65627	0.00201364	0.00588115
	SF3B4	1.20979	3.05795e-05	0.000122632		ENSSSCG00000034352	1.33354	0.00201473	0.00588328
	ENSSSCG00000057781	2.18499	3.06179e-05	0.000122755		ENSSSCG00000005916	1.0864	0.0020293	0.00591935
	CCN4	1.32637	3.06658e-05	0.000122916		NOS1	1.93504	0.00206564	0.00600937
	SLC26A2	1.06573	3.07001e-05	0.000123023		DLX4	2.19659	0.00209648	0.00609426
	CGAS	1.39523	3.12567e-05	0.000125066		EEF1A2	1.26462	0.00210384	0.00611234
	SCN9A	1.36235	3.15925e-05	0.000126378		DOC2B	1.4384	0.00210989	0.00612769
	DHX35	1.26384	3.16278e-05	0.000126456		TREX1	1.02602	0.00211222	0.00613224
	ENSSSCG00000048996	2.77861	3.1836e-05	0.000127225		ENSSSCG00000041863	2.0682	0.00213662	0.00619523
	TGFB1	1.71655	3.21931e-05	0.000128459		ENSSSCG00000012006	1.27354	0.00214524	0.00621687
	KLHL22	1.15137	3.24196e-05	0.000129266		ENSSSCG00000051958	1.25276	0.00215761	0.00625046
	RET	1.42374	3.25149e-05	0.000129614		PLAUR	1.20539	0.00216099	0.0062591
	ENSSSCG00000044108	2.33671	3.31558e-05	0.000131972		MECOM	1.3477	0.0021733	0.00629249
	RAE1	1.22628	3.36097e-05	0.000133579		STK32B	2.07663	0.00220866	0.00637918
	SOGA3	1.32172	3.39392e-05	0.000134789		MYO1G	1.00582	0.0022377	0.00644756
	RAP2B	1.29448	3.40212e-05	0.000135081		SPX	1.85062	0.00225232	0.00648268
	MFHAS1	1.44028	3.41671e-05	0.000135626		RRP7A	1.09187	0.00225782	0.00649503
	RNASE1	1.84562	3.42005e-05	0.000135725		CACNA1B	1.00951	0.00226249	0.00650729
	ENSSSCG00000051570	1.44884	3.48574e-05	0.000138161		ENSSSCG00000028802	2.02161	0.00229863	0.00660177
	RNFT2	1.79015	3.5099e-05	0.000139015		TMEM229A	1.24673	0.00230808	0.00662772
	ESYT1	1.05371	3.54807e-05	0.000140354		ENSSSCG00000056535	5.1642	0.00232585	0.00667159
	DOP1B	1.15788	3.56417e-05	0.000140956		ZNF358	1.00732	0.0023566	0.00675212
	CENPB	1.01666	3.57746e-05	0.000141446		TMEM200C	2.07584	0.00236921	0.00678105
	IMPDH1	1.00797	3.59061e-05	0.000141861		PTPRQ	2.35336	0.00239216	0.0068349
	CACNA2D4	3.13489	3.59469e-05	0.000141987		ENSSSCG00000021675	1.47523	0.00239348	0.00683628
	TNRC6C	1.13864	3.62834e-05	0.000143167		DLX2	6.11989	0.0024065	0.00686735
	CNGA4	2.9676	3.64322e-05	0.000143691		NPPB	6.34966	0.00241252	0.00688207
	KLF4	1.36712	3.64657e-05	0.000143753		GPR39	1.09897	0.00246853	0.00702645
	ENSSSCG00000055533	2.86377	3.65779e-05	0.000144124		ENSSSCG00000041004	2.48147	0.00248822	0.00707162
	SH3BP2	1.14421	3.67519e-05	0.000144774		PTGS1	1.08651	0.00249204	0.00708122
	TLN2	1.14547	3.69115e-05	0.000145331		ANKRD61	2.76346	0.00250899	0.00712057
	ENSSSCG00000062427	1.79541	3.70852e-05	0.000145907		QRFP	3.831	0.00251591	0.00713893
	STARD5	1.37713	3.72518e-05	0.000146455		AZIN2	1.18763	0.00255448	0.00723686
	AP5Z1	1.00816	3.75768e-05	0.000147588		REELD1	3.08635	0.00260541	0.0073644
	ENSSSCG00000012006	1.51642	3.77594e-05	0.000148232		CACNA1C	1.04673	0.00270907	0.0076317
	OPRM1	2.74787	3.79661e-05	0.000148934		GCNT3	1.3889	0.00271979	0.00766019
	ACVR2B	1.35109	3.80281e-05	0.000149068		ENSSSCG00000061983	1.35295	0.00276278	0.00776666
	CAMK2B	2.05631	3.82734e-05	0.000149992		ENSSSCG00000023603	1.49976	0.00278469	0.00782002
	ARL6IP6	1.27976	3.86699e-05	0.000151472		TENT5B	1.08914	0.00280706	0.0078746
	ENSSSCG00000062387	5.17101	3.87008e-05	0.000151556		TOMM20L	1.86947	0.00283275	0.00793695
	FJX1	1.45008	3.89188e-05	0.000152335		ENSSSCG00000039214	1.67804	0.00286207	0.00801069
	SLC16A2	1.50778	3.89453e-05	0.000152402		CPNE4	1.66109	0.00288121	0.00805846
	SLC10A3	1.1285	3.90229e-05	0.000152668		ENSSSCG00000050273	1.86461	0.00290387	0.00811639
	PSME3	1.37591	3.90985e-05	0.000152889		ENSSSCG00000052778	5.84692	0.00294328	0.00821936
	SEMA4F	1.4574	3.95943e-05	0.000154677		HAS1	2.96317	0.0029533	0.00824162
	ENSSSCG00000061658	3.96786	3.97652e-05	0.000155307		PIK3CD	1.27436	0.00302296	0.00841697
	ENSSSCG00000046291	1.90644	4.02255e-05	0.000156913		NTNG2	3.03151	0.00303083	0.00843744
	CLSTN3	2.67895	4.1288e-05	0.000160822		P2RX5	1.32155	0.00303433	0.00844571
	CD47	1.01557	4.1301e-05	0.000160834		PRR7	2.67403	0.00309272	0.0085978
	CISH	1.53394	4.23242e-05	0.000164538		CRLF1	2.39467	0.00310795	0.00862967
	AURKB	1.49132	4.25682e-05	0.000165366		ENSSSCG00000052432	2.62783	0.00310763	0.00862967
	GLRA2	2.0058	4.25855e-05	0.000165393		ENSSSCG00000003998	1.12452	0.00311259	0.00863956
	KLC2	1.2451	4.33053e-05	0.000167904		KCNB1	1.25087	0.00314649	0.00872462
	PRPSAP1	1.24714	4.34619e-05	0.000168429		GDAP1	1.04865	0.003157	0.00874559
	SRCIN1	2.12382	4.36241e-05	0.000168999		OPRD1	1.75088	0.00322886	0.00891603
	ENSSSCG00000009221	2.00591	4.38479e-05	0.000169802		KRT4	3.9542	0.00322966	0.00891669
	TRIM25	1.20414	4.38964e-05	0.000169949		ENSSSCG00000027118	1.27933	0.0032842	0.00904862
	ENSSSCG00000045769	1.50669	4.43944e-05	0.000171794		NKAIN3	2.47899	0.00329051	0.00906133
	MAFK	1.0749	4.46112e-05	0.000172549		C4orf36	4.30377	0.00331501	0.00912096
	SLITRK1	1.63985	4.46328e-05	0.000172591		SOX17	1.1021	0.00341629	0.00937233
	SIDT1	1.41482	4.48954e-05	0.000173564		ATP8A2	1.51926	0.00344927	0.00945472
	QTRT1	1.24218	4.49793e-05	0.000173847		LIPG	2.72195	0.00348353	0.0095372
	HOXD4	1.4023	4.51112e-05	0.000174231		TMEM63C	1.95834	0.00349418	0.00956149
	FOXJ2	1.21252	4.52905e-05	0.000174838		ANO8	1.19485	0.00349585	0.00956443
	ENSSSCG00000052944	4.43805	4.54549e-05	0.000175389		GPR157	1.41131	0.00349859	0.00957029
	GNA14	1.33895	4.58625e-05	0.000176833		SYT5	1.37415	0.00349977	0.00957188
	DCAKD	1.00006	4.60951e-05	0.000177602		CXCL9	1.37586	0.00353846	0.00966783
	COPE	1.13395	4.62889e-05	0.000178306		SPTB	1.21735	0.00362638	0.00988614
	EFNB2	1.16775	4.63377e-05	0.000178451		SIX4	1.81557	0.00365758	0.00996104
	ENSSSCG00000044753	5.80956	4.65286e-05	0.000179143		ENSSSCG00000046767	1.88052	0.00367287	0.00999761
	DMP1	2.37924	4.6952e-05	0.000180686		FNDC9	1.97234	0.00367704	0.0100039
	TTC7B	1.23247	4.70613e-05	0.00018102		GHRHR	1.08399	0.00370645	0.0100787
	C11orf42	1.86361	4.75236e-05	0.00018271		CACNA1E	1.27896	0.00373609	0.0101456
	GPAM	1.07758	4.78363e-05	0.000183824		ENSSSCG00000043871	1.92934	0.0038178	0.0103396
	RSAD1	1.4615	4.8438e-05	0.000185913		TCN1	1.35691	0.00383558	0.0103771
	CHRNB3	2.8716	4.86942e-05	0.000186807		PKN3	1.13347	0.00383789	0.0103817
	MAZ	1.00339	4.89851e-05	0.000187878		UNC5A	1.48211	0.00388585	0.0104972
	TECPR1	1.05765	4.95832e-05	0.000190035		ENSSSCG00000038462	2.49466	0.00392311	0.0105872
	TSHZ3	1.50941	4.96208e-05	0.000190134		ENSSSCG00000056885	1.11144	0.00392863	0.0106003
	FMNL3	1.30803	4.9792e-05	0.000190699		ENSSSCG00000039706	1.90505	0.00396958	0.010691
	PID1	1.05167	4.98221e-05	0.000190768		ENSSSCG00000033643	1.74846	0.00404913	0.0108797
	ENSSSCG00000006525	2.15279	5.01946e-05	0.000192148		PCDHGA6	1.56556	0.00406353	0.0109111
	ENSSSCG00000047303	1.59406	5.0618e-05	0.000193723		MEGF10	1.20167	0.00411782	0.0110439
	PSMD3	1.16904	5.06452e-05	0.000193781		NPC1L1	1.12779	0.004125	0.0110595
	P2RX2	2.40147	5.11063e-05	0.000195452		DPYSL5	1.76483	0.00414652	0.0111042
	ROBO3	2.44034	5.11237e-05	0.000195471		FN3K	1.12753	0.0041692	0.0111612
	RHBDD1	1.11944	5.15589e-05	0.000197042		LRRC74B	1.47211	0.00418116	0.0111895
	ENSSSCG00000031299	1.0165	5.18976e-05	0.000198194		TNFAIP3	1.14527	0.00419592	0.0112234
	ENSSSCG00000059113	1.27013	5.20303e-05	0.000198653		CHRM3	1.05125	0.00419797	0.011227
	JAK3	1.43143	5.24752e-05	0.000200209		ISLR2	1.43298	0.00422248	0.0112794
	MBD6	1.21344	5.31274e-05	0.000202408		ENSSSCG00000050058	1.00336	0.00427793	0.0114123
	USP43	1.17432	5.33413e-05	0.000203174		ENSSSCG00000037003	1.64995	0.00428608	0.0114284
	GJB3	6.04645	5.35732e-05	0.000203961		SLCO1A2	2.52165	0.00430613	0.0114799
	RRP9	1.14194	5.35883e-05	0.00020397		LYPD8	1.29339	0.00431579	0.0115019
	MYT1L	2.54718	5.40689e-05	0.000205603		ANKDD1B	1.14409	0.00438828	0.0116795
	ENSSSCG00000044786	2.00174	5.47516e-05	0.0002081		NEMP2	1.01533	0.00440603	0.0117248
	CDT1	1.32027	5.48441e-05	0.000208402		ENSSSCG00000046737	1.34832	0.00442971	0.01178
	SMCR8	1.08865	5.51582e-05	0.000209397		ENSSSCG00000011851	1.27435	0.00448515	0.0119004
	SPAAR	1.26017	5.59628e-05	0.000211999		ENSSSCG00000037422	6.76412	0.00450013	0.0119297
	SPAM1	2.89563	5.60363e-05	0.000212177		ENSSSCG00000033819	1.58293	0.00455431	0.0120594
	KIF2C	1.20087	5.64305e-05	0.000213569		ENSSSCG00000057055	2.28177	0.00461997	0.0122192
	ARG1	2.32941	5.65581e-05	0.000214001		DNM1	1.26684	0.00462123	0.0122202
	CFAP52	2.25334	5.69548e-05	0.000215299		ENSSSCG00000055987	2.65226	0.0046305	0.012241
	RIPOR2	1.72265	5.74697e-05	0.000217091		TRIM66	1.02796	0.00466059	0.0123104
	GPR4	1.78565	5.77577e-05	0.000218076		SOX12	1.33832	0.00468708	0.0123661
	PEG3	1.29971	5.80769e-05	0.00021923		C19orf54	1.11369	0.00469919	0.012394
	SLC25A30	1.01957	5.82517e-05	0.000219838		ENSSSCG00000045239	2.83698	0.00472565	0.0124453
	TMEM47	1.45583	5.89123e-05	0.000222226		HES4	1.34853	0.00473923	0.012475
	WFS1	1.37262	5.89871e-05	0.000222456		SCRN1	1.66231	0.00477692	0.0125618
	ZFHX3	1.00231	5.91532e-05	0.00022303		ENSSSCG00000041722	1.27675	0.00478317	0.0125741
	NIP7	1.29367	5.93188e-05	0.000223601		NRAP	1.16284	0.00487387	0.012777
	ENSSSCG00000049622	2.72693	6.03294e-05	0.000227037		KIAA1549	1.19525	0.00493105	0.0129142
	TROAP	1.73246	6.16479e-05	0.000231726		ENSSSCG00000062660	2.31664	0.00493921	0.0129293
	PDE4A	1.08231	6.16792e-05	0.000231789		ENSSSCG00000060467	2.44184	0.00507681	0.0132312
	SDS	2.50615	6.19982e-05	0.000232933		DTYMK	1.09165	0.00510947	0.0132969
	H2AC20	1.5411	6.22962e-05	0.000233998		MGP	1.02176	0.0051858	0.0134671
	FANCD2	1.23535	6.31282e-05	0.000236846		KLHL1	1.95562	0.00524633	0.0136133
	TOP3A	1.13885	6.34109e-05	0.00023785		LRFN1	2.57308	0.00526711	0.0136562
	ENSSSCG00000042730	1.89811	6.41109e-05	0.000240267		L1CAM	1.1312	0.00529186	0.0137115
	MYO5C	1.39686	6.50085e-05	0.000243473		ENSSSCG00000060307	1.63844	0.00529142	0.0137115
	RNF122	2.52659	6.50163e-05	0.000243473		FXYD3	1.25871	0.00531588	0.0137715
	ZNF395	1.43488	6.52829e-05	0.000244357		RAMP3	1.50454	0.00537944	0.0139182
	CMTM2	3.36885	6.60305e-05	0.000246924		ENSSSCG00000052929	5.42048	0.00547314	0.0141447
	ENDOG	1.13302	6.63424e-05	0.000247859		GPR84	1.8459	0.0056753	0.0146016
	ENSSSCG00000060380	6.24763	6.67517e-05	0.000249272		ENSSSCG00000044637	1.39072	0.00576547	0.0147977
	UPK1B	1.57558	6.69962e-05	0.00025001		AUNIP	1.6913	0.00585191	0.0149956
	DNASE1L2	1.16969	6.70934e-05	0.000250314		CHST7	1.19404	0.00592572	0.0151702
	COL18A1	1.12971	6.75687e-05	0.00025197		TNK2	1.00844	0.00596574	0.0152556
	ENSSSCG00000047268	2.59395	6.78962e-05	0.000252897		ENSSSCG00000041534	1.31006	0.00596913	0.0152618
	ENSSSCG00000044924	2.2488	6.80742e-05	0.000253383		FGF17	1.60078	0.00597557	0.0152734
	AFMID	1.34178	6.83101e-05	0.000254084		HAND1	1.36107	0.0059858	0.0152947
	UTP20	1.04903	6.94014e-05	0.000257664		ENSSSCG00000051306	3.85732	0.00610024	0.01555
	ENSSSCG00000046967	2.0636	6.96265e-05	0.00025838		GABRA4	2.19178	0.00618168	0.0157301
	DOK6	1.31186	7.00363e-05	0.00025978		ENSSSCG00000061715	1.07744	0.00621415	0.0158002
	ENSSSCG00000045066	1.81174	7.02272e-05	0.000260247		TFF1	3.19216	0.0062261	0.0158256
	FBXO39	1.24616	7.04658e-05	0.00026095		LMOD1	1.04992	0.00625834	0.0158949
	SBK1	3.20787	7.05231e-05	0.000261074		ENSSSCG00000009648	1.18116	0.00629036	0.0159636
	GALR1	1.23235	7.17212e-05	0.000264925		SLC26A7	1.22166	0.0063827	0.0161622
	KIAA1755	1.78701	7.19317e-05	0.00026558		PRKAR1B	1.61822	0.0063888	0.0161751
	SLC25A39	1.04939	7.22187e-05	0.000266517		ENSSSCG00000062035	1.31428	0.00641215	0.0162265
	CACNA1B	1.46599	7.33877e-05	0.000270706		DOK6	1.01143	0.00641797	0.0162387
	PHYKPL	1.33091	7.35108e-05	0.000271098		DND1	1.29515	0.00642485	0.0162535
	CSRNP2	1.1057	7.37942e-05	0.000271955		VGLL3	1.11872	0.00653694	0.0165059
	ENSSSCG00000013024	1.76561	7.3816e-05	0.000271973		SLC6A17	1.60551	0.00679632	0.0170775
	ENSSSCG00000007920	2.08381	7.47553e-05	0.000275117		ENSSSCG00000017446	1.35763	0.00686809	0.0172471
	PPRC1	1.16175	7.482e-05	0.000275291		ENSSSCG00000054603	2.71624	0.00687083	0.0172512
	ENSSSCG00000046543	1.6988	7.57294e-05	0.000278264		MYOCD	1.12908	0.00693588	0.0173842
	ENSSSCG00000013092	6.57114	7.60894e-05	0.00027932		INPP5J	1.06864	0.00700506	0.0175361
	PHF12	1.38728	7.61876e-05	0.000279553		MEDAG	1.22051	0.00705	0.0176248
	CFB	1.47931	7.6175e-05	0.000279553		ENSSSCG00000053989	2.94787	0.00710273	0.0177474
	GIGYF1	1.23007	7.64456e-05	0.000280435		ENSSSCG00000039020	2.86995	0.00710644	0.0177539
	RSPH9	3.97838	7.70894e-05	0.000282473		DPYSL4	1.7254	0.00716545	0.0178763
	ENSSSCG00000039830	1.25405	7.72011e-05	0.000282795		NOVA2	1.41119	0.00717804	0.0179021
	ENSSSCG00000043201	1.93683	7.72126e-05	0.000282795		SV2C	1.02388	0.0072058	0.0179602
	PHLDA1	1.52937	7.75084e-05	0.000283813		CDK5R2	2.57661	0.0072158	0.0179796
	C9orf131	1.70428	7.82305e-05	0.000286132		KCNG1	1.23963	0.00727289	0.018105
	SPTB	1.7579	7.85988e-05	0.000287412		ENSSSCG00000046114	1.8995	0.00730439	0.0181721
	ENSSSCG00000027903	3.25121	7.86475e-05	0.000287524		ENSSSCG00000055799	1.07948	0.00753742	0.0186708
	ENSSSCG00000061715	1.48409	7.87887e-05	0.000287974		CABP7	4.295	0.00755391	0.0187059
	EPHB4	1.06848	7.91833e-05	0.000289351		ENTREP3	1.12832	0.0075736	0.018743
	LRRC4	1.83881	8.09943e-05	0.000295496		ENSSSCG00000038418	2.55966	0.00758643	0.0187719
	CHRNB2	2.09224	8.17933e-05	0.00029814		ATP6V1C2	3.27495	0.00760577	0.0187995
	ENSSSCG00000039214	3.6577	8.21051e-05	0.00029914		AMDHD1	1.65807	0.00768759	0.018955
	ENSSSCG00000045942	1.54257	8.27638e-05	0.000301403		PROKR1	2.5102	0.00773975	0.0190631
	ADAT3	1.71729	8.33933e-05	0.00030335		DNAL4	1.0413	0.0077879	0.019167
	ENSSSCG00000048237	1.58764	8.37731e-05	0.000304524		OPRM1	2.00191	0.00784282	0.0192844
	RBMS1	1.02015	8.47295e-05	0.000307791		SCD5	1.47445	0.00791019	0.0194337
	CCKAR	1.83835	8.61278e-05	0.000312303		TMEM72	2.2158	0.00801434	0.019646
	PCDHGA6	2.02451	8.6212e-05	0.000312538		ENSSSCG00000051357	5.81444	0.00807789	0.0197776
	KRT7	2.6824	8.6434e-05	0.000313201		LRIT3	2.11711	0.00808102	0.0197779
	ENSSSCG00000022258	2.54929	8.65372e-05	0.000313362		ENSSSCG00000050847	1.31791	0.00808172	0.0197779
	TDRKH	1.55581	8.65899e-05	0.000313482		SLC3A1	1.4215	0.00811729	0.0198589
	FGFR4	1.46424	8.76982e-05	0.000316993		SYT14	1.6768	0.00820911	0.020053
	TNFRSF1B	1.25202	8.93019e-05	0.000322426		UNC13D	1.24406	0.00823887	0.0201134
	SERPINC1	2.20912	8.94558e-05	0.000322836		ENSSSCG00000050585	1.40574	0.00837838	0.0204167
	KANK1	1.09305	9.00115e-05	0.000324694		DNAH1	1.15365	0.00838025	0.0204182
	FOXC2	2.95867	9.0227e-05	0.000325399		ENSSSCG00000053515	4.13395	0.00838924	0.0204339
	SIX5	1.02598	9.04063e-05	0.000325972		ACP3	1.9667	0.00846513	0.0206
	CORO2B	1.49643	9.04606e-05	0.000326094		C11orf94	1.28132	0.00852405	0.0207182
	FOXS1	1.58258	9.05975e-05	0.00032644		FOXRED2	1.0515	0.00869326	0.0210562
	SGPP2	1.11221	9.07268e-05	0.000326833		ENSSSCG00000057661	2.48653	0.00871786	0.021103
	UBA7	1.94786	9.19709e-05	0.000330719		SLC2A12	1.04821	0.0087265	0.0211144
	ENSSSCG00000052903	2.1679	9.28935e-05	0.000333845		DLGAP1	1.46747	0.00880602	0.0212797
	ENSSSCG00000059647	2.87586	9.32434e-05	0.000334994		G0S2	1.10005	0.00880977	0.021283
	FAM83D	1.46992	9.37881e-05	0.0003368		ENSSSCG00000047378	1.26208	0.00887394	0.0214162
	FOXRED2	1.14593	9.4263e-05	0.000338278		ENSSSCG00000055533	2.29885	0.00888736	0.0214422
	ENSSSCG00000049158	1.02451	9.44675e-05	0.000338935		ATP2B2	1.17064	0.009024	0.0217555
	ENSSSCG00000042474	1.87622	9.50545e-05	0.000340812		ASCL1	1.69068	0.00906486	0.0218343
	PLXDC1	1.38318	9.53941e-05	0.0003418		GABRD	2.02275	0.00908276	0.0218676
	ENSSSCG00000055870	3.06213	9.54171e-05	0.000341806		PALS2	1.09321	0.00919387	0.0220986
	CADM3	1.379	9.55688e-05	0.000342239		LRRC4	1.3767	0.00924738	0.0222139
	IER3	1.52138	9.63665e-05	0.000344899		ENSSSCG00000040041	1.39604	0.00927458	0.0222693
	ENSSSCG00000046889	1.17215	9.67093e-05	0.000346048		MST1	1.0951	0.00933456	0.0223908
	CYP8B1	2.2885	9.82664e-05	0.000351306		KCNJ6	1.06312	0.0096052	0.0229709
	ENSSSCG00000051765	1.95444	9.84143e-05	0.000351756		PBX4	1.80709	0.00960544	0.0229709
	EVPL	2.06514	9.85418e-05	0.000352133		GPSM1	1.13444	0.00960953	0.0229773
	PLEKHA6	1.02632	9.93336e-05	0.000354725		CDH10	1.10242	0.00964394	0.0230458
	PLEK	1.68606	9.93635e-05	0.000354753		ENSSSCG00000051030	1.00092	0.00971095	0.0231714
	MAFF	1.36317	9.98281e-05	0.000356094		FCMR	1.49114	0.00975624	0.0232691
	CABP7	4.89838	0.000100118	0.000356967		TMEFF2	1.11258	0.00977043	0.023296
[truncated: 6,726 more rows]
