# Supplementary material for: Transcriptomics yields valuable information regarding the response mechanisms of Chinese Min pigs infected with PEDV
Source: Front Vet Sci. 2023 Dec 11;10:1295723. doi: 10.3389/fvets.2023.1295723 (PMC10773921; doi:10.3389/fvets.2023.1295723)
Supplement: Supplementary file 13 [file Table_5.xlsx]

## Sheet: Sheet1
Table S5 Differentially expressed transcription factors
Matrix ID	Name	log2FoldChange	Group
MA0601.1	ARID3B	1.77453	Dead vs. Control-up
MA1631.1, MA1100.2	ASCL1	1.69068	Resistance vs. Control-up
MA1631.1, MA1100.2	ASCL1	1.54424	Dead vs. Control-up
MA0216.2	CAD	2.17681	Resistance vs. Control-up
MA0216.2	CAD	2.44595	Dead vs. Control-up
MA0878.3	CDX1	2.68029	Resistance vs. Control-up
MA0878.3	CDX1	2.63487	Dead vs. Control-up
MA0154.4	EBF1	1.10035	Dead vs. Resistance-up
MA0154.4	EBF1	1.14554	Dead vs. Control-up
MA0162.4	EGR1	2.28544	Resistance vs. Control-up
MA0472.2	EGR2	1.77989	Dead vs. Resistance-up
MA0472.2	EGR2	1.88995	Dead vs. Control-up
MA0732.1	EGR3	4.11073	Dead vs. Control-up
MA0764.3	ETV4	2.76006	Resistance vs. Control-up
MA0764.3	ETV4	3.38091	Dead vs. Control-up
MA0645.1	ETV6	1.65037	Resistance vs. Control-up
MA0645.1	ETV6	2.01796	Dead vs. Control-up
MA1683.1	FOXA3	1.48792	Resistance vs. Control-up
MA0032.2	FOXC1	2.0913	Dead vs. Control-up
MA0846.1	FOXC2	2.95867	Dead vs. Control-up
MA1606.1	FOXF1	1.11682	Dead vs. Control-up
MA0851.1	FOXJ3	1.04975	Dead vs. Control-up
MA0481.3	FOXP1	1.53504	Dead vs. Control-up
MA0036.3	GATA2	1.21722	Dead vs. Control-up
MA1099.2	HES1	-1.72168	Resistance vs. Control-down
MA1099.2	HES1	-1.09446	Dead vs. Control-down
MA0898.1	HMX3	1.46368	Resistance vs. Control-up
MA0898.1	HMX3	1.29956	Dead vs. Control-up
MA0155.1	INSM1	3.29593	Resistance vs. Control-up
MA0155.1	INSM1	2.85694	Dead vs. Control-up
MA0657.1	KLF13	1.26951	Dead vs. Control-up
MA1513.1, MA1890.1, MA1513.1	KLF15	2.04873	Resistance vs. Control-up
MA1513.1, MA1890.1, MA1513.1	KLF15	2.62119	Dead vs. Control-up
MA0741.1	KLF16	1.25183	Resistance vs. Control-up
MA0741.1	KLF16	1.52159	Dead vs. Control-up
MA1515.1	KLF2	1.58011	Resistance vs. Control-up
MA1515.1	KLF2	2.26233	Dead vs. Control-up
MA0039.4	KLF4	1.09846	Resistance vs. Control-up
MA0039.4	KLF4	1.36712	Dead vs. Control-up
MA0599.1	KLF5	1.03905	Resistance vs. Control-up
MA1517.1	KLF6	1.75177	Resistance vs. Control-up
MA1517.1	KLF6	1.41941	Dead vs. Control-up
MA1107.2	KLF9	1.38919	Dead vs. Control-up
MA1522.1	MAZ	1.00339	Dead vs. Control-up
MA1158.1	MGP	1.02176	Resistance vs. Control-up
MA1158.1	MGP	1.22199	Dead vs. Control-up
MA0777.1	MYBL2	2.29032	Resistance vs. Control-up
MA0777.1	MYBL2	2.57128	Dead vs. Control-up
MA1525.2	NFATC4	1.1751	Dead vs. Control-up
MA1527.1	NFIC	1.24832	Resistance vs. Control-up
MA1527.1	NFIC	1.81114	Dead vs. Control-up
MA1537.1	NR2F1	-2.18247	Resistance vs. Control-down
MA0506.2	NRF1	1.0343	Resistance vs. Control-up
MA0506.2	NRF1	1.22797	Dead vs. Control-up
MA0681.2	PHOX2B	1.64291	Resistance vs. Control-up
MA0681.2	PHOX2B	1.80467	Dead vs. Control-up
MA0507.2	POU2F2	2.07278	Dead vs. Control-up
MA0107.1	RELA	1.14224	Resistance vs. Control-up
MA0107.1	RELA	1.20937	Dead vs. Control-up
MA1117.1	RELB	1.16048	Dead vs. Resistance-up
MA0509.3	RFX1	1.15147	Resistance vs. Control-up
MA0509.3	RFX1	1.21208	Dead vs. Control-up
MA0600.2	RFX2	1.90096	Resistance vs. Control-up
MA0600.2	RFX2	2.93687	Dead vs. Control-up
MA0512.2	RXRA	1.13003	Dead vs. Control-up
MA0745.2	SNAI2	-1.64435	Resistance vs. Control-down
MA0745.2	SNAI2	2.03847	Dead vs. Resistance-up
MA1965.1	SP5	1.70537	Resistance vs. Control-up
MA1965.1	SP5	1.43037	Dead vs. Control-up
MA0597.2	THAP1	-1.22016	Resistance vs. Control-down
MA0597.2	THAP1	-1.99353	Dead vs. Control-down
MA1627.1	WT1	2.75376	Dead vs. Control-up
MA1581.1	ZBTB6	-1.06046	Dead vs. Control-down
MA0750.2	ZBTB7A	1.89447	Resistance vs. Control-up
MA0750.2	ZBTB7A	2.1691	Dead vs. Control-up
MA0103.3	ZEB1	1.12067	Dead vs. Resistance-up
MA0103.3	ZEB1	1.09795	Dead vs. Control-up
MA1972.1	ZFP14	-1.16576	Dead vs. Control-down
MA1653.1	ZNF148	-1.02385	Resistance vs. Control-down
MA1656.1	ZNF449	-1.23316	Dead vs. Control-down
MA1712.1	ZNF454	-1.1184	Resistance vs. Control-down
