# Supplementary material for: Transcriptomics yields valuable information regarding the response mechanisms of Chinese Min pigs infected with PEDV
Source: Frontiers journal article supplement (doi:10.3389/fvets.2023.1295723), 2023-12-11
Supplement: Table_1.xlsx [file Table_1.xlsx]

## Sheet: Sheet1
Table S1 The results of the identified PCGs,lncRNAs and miRNAs in this study
Ensembl_ID	Gene_symbol	Annotated lncRNAs	Novel lncRNAs	Annotated miRNAs	Novel miRNAs
ENSSSCG00000010431	A1CF	ENSSSCG00000001057	XLOC_000004	ssc-let-7a	1_1060
ENSSSCG00000000660	A2M	ENSSSCG00000016026	XLOC_000010	ssc-let-7c	1_1128
ENSSSCG00000026962	A4GALT	ENSSSCG00000017515	XLOC_000012	ssc-let-7d-3p	1_12
ENSSSCG00000022473	A4GNT	ENSSSCG00000017834	XLOC_000021	ssc-let-7d-5p	1_1353
ENSSSCG00000000268	AAAS	ENSSSCG00000021815	XLOC_000039	ssc-let-7e	1_1723
ENSSSCG00000009755	AACS	ENSSSCG00000027988	XLOC_000040	ssc-let-7f-3p	1_1799
ENSSSCG00000031367	AADAC	ENSSSCG00000030438	XLOC_000043	ssc-let-7f-5p	1_1828
ENSSSCG00000009708	AADAT	ENSSSCG00000031683	XLOC_000046	ssc-let-7g	1_1833
ENSSSCG00000004951	AAGAB	ENSSSCG00000032483	XLOC_000049	ssc-let-7i-3p	1_1881
ENSSSCG00000008337	AAK1	ENSSSCG00000032549	XLOC_000050	ssc-let-7i-5p	1_1882
ENSSSCG00000016189	AAMP	ENSSSCG00000033386	XLOC_000060	ssc-miR-1	1_1908
ENSSSCG00000007315	AAR2	ENSSSCG00000033434	XLOC_000071	ssc-miR-100	1_1974
ENSSSCG00000006013	AARD	ENSSSCG00000033537	XLOC_000077	ssc-miR-101	1_2378
ENSSSCG00000002723	AARS1	ENSSSCG00000033707	XLOC_000119	ssc-miR-103	1_2452
ENSSSCG00000001706	AARS2	ENSSSCG00000033745	XLOC_000127	ssc-miR-10382	1_2535
ENSSSCG00000037979	AARSD1	ENSSSCG00000033874	XLOC_000133	ssc-miR-10383	1_2927
ENSSSCG00000027403	AASDH	ENSSSCG00000034087	XLOC_000135	ssc-miR-10384	1_3042
ENSSSCG00000014998	AASDHPPT	ENSSSCG00000034567	XLOC_000151	ssc-miR-10386	1_3055
ENSSSCG00000016613	AASS	ENSSSCG00000034990	XLOC_000168	ssc-miR-10388	1_3071
ENSSSCG00000017693	AATF	ENSSSCG00000035331	XLOC_000169	ssc-miR-10390	1_387
ENSSSCG00000007909	ABAT	ENSSSCG00000035437	XLOC_000170	ssc-miR-10391	1_612
ENSSSCG00000005423	ABCA1	ENSSSCG00000035571	XLOC_000177	ssc-miR-105-1	1_617
ENSSSCG00000031141	ABCA13	ENSSSCG00000035617	XLOC_000179	ssc-miR-105-2	1_792
ENSSSCG00000039264	ABCA2	ENSSSCG00000035785	XLOC_000186	ssc-miR-106a	1_859
ENSSSCG00000008051	ABCA3	ENSSSCG00000035996	XLOC_000194	ssc-miR-107	1_924
ENSSSCG00000017255	ABCA5	ENSSSCG00000036096	XLOC_000195	ssc-miR-10a-3p	10_28039
ENSSSCG00000017256	ABCA6	ENSSSCG00000036144	XLOC_000196	ssc-miR-10a-5p	10_28115
ENSSSCG00000023121	ABCA7	ENSSSCG00000036524	XLOC_000198	ssc-miR-10b	10_28116
ENSSSCG00000026473	ABCA8	ENSSSCG00000036815	XLOC_000200	ssc-miR-122-3p	10_28280
ENSSSCG00000017257	ABCA9	ENSSSCG00000036846	XLOC_000201	ssc-miR-122-5p	10_28334
ENSSSCG00000010188	ABCB10	ENSSSCG00000036894	XLOC_000237	ssc-miR-124a	10_28345
ENSSSCG00000015926	ABCB11	ENSSSCG00000037074	XLOC_000242	ssc-miR-125a	10_28362
ENSSSCG00000016210	ABCB6	ENSSSCG00000037324	XLOC_000275	ssc-miR-125b	10_28378
ENSSSCG00000012424	ABCB7	ENSSSCG00000037652	XLOC_000282	ssc-miR-126-3p	10_28385
ENSSSCG00000027986	ABCB8	ENSSSCG00000037770	XLOC_000296	ssc-miR-126-5p	10_28479
ENSSSCG00000009784	ABCB9	ENSSSCG00000037794	XLOC_000319	ssc-miR-127	10_28480
ENSSSCG00000007874	ABCC1	ENSSSCG00000037997	XLOC_000323	ssc-miR-1271-3p	10_28521
ENSSSCG00000001680	ABCC10	ENSSSCG00000038005	XLOC_000327	ssc-miR-1271-5p	10_28576
ENSSSCG00000010543	ABCC2	ENSSSCG00000038150	XLOC_000347	ssc-miR-128	10_28636
ENSSSCG00000017561	ABCC3	ENSSSCG00000038208	XLOC_000357	ssc-miR-1285	10_28924
ENSSSCG00000011782	ABCC5	ENSSSCG00000038539	XLOC_000387	ssc-miR-1296-5p	10_28955
ENSSSCG00000007873	ABCC6	ENSSSCG00000039279	XLOC_000409	ssc-miR-129a-3p	11_28989
ENSSSCG00000013378	ABCC8	ENSSSCG00000039561	XLOC_000413	ssc-miR-129a-5p	11_29005
ENSSSCG00000000571	ABCC9	ENSSSCG00000039791	XLOC_000414	ssc-miR-129b	11_29465
ENSSSCG00000012779	ABCD1	ENSSSCG00000039815	XLOC_000418	ssc-miR-1306-3p	11_29486
ENSSSCG00000000781	ABCD2	ENSSSCG00000039821	XLOC_000473	ssc-miR-1306-5p	11_29511
ENSSSCG00000028620	ABCD3	ENSSSCG00000039990	XLOC_000485	ssc-miR-1307	11_29566
ENSSSCG00000038231	ABCD4	ENSSSCG00000040019	XLOC_000502	ssc-miR-130a	11_29572
ENSSSCG00000009043	ABCE1	ENSSSCG00000040260	XLOC_000522	ssc-miR-130b-3p	11_29597
ENSSSCG00000001346	ABCF1	ENSSSCG00000040413	XLOC_000584	ssc-miR-130b-5p	11_29651
ENSSSCG00000016441	ABCF2	ENSSSCG00000040829	XLOC_000620	ssc-miR-132	11_29704
ENSSSCG00000028856	ABCF3	ENSSSCG00000041031	XLOC_000623	ssc-miR-133a-3p	11_29839
ENSSSCG00000027745	ABCG1	ENSSSCG00000041045	XLOC_000678	ssc-miR-133a-5p	11_30007
ENSSSCG00000009215	ABCG2	ENSSSCG00000041050	XLOC_000699	ssc-miR-133b	11_30009
ENSSSCG00000015113	ABCG4	ENSSSCG00000041092	XLOC_000741	ssc-miR-1343	12_30068
ENSSSCG00000035912	ABCG5	ENSSSCG00000041094	XLOC_000742	ssc-miR-135	12_30092
ENSSSCG00000008453	ABCG8	ENSSSCG00000041121	XLOC_000773	ssc-miR-136-3p	12_30149
ENSSSCG00000008554	ABHD1	ENSSSCG00000041123	XLOC_000798	ssc-miR-136-5p	12_30152
ENSSSCG00000034450	ABHD10	ENSSSCG00000041145	XLOC_000828	ssc-miR-137	12_30181
ENSSSCG00000007715	ABHD11	ENSSSCG00000041147	XLOC_000846	ssc-miR-138	12_30184
ENSSSCG00000040449	ABHD12	ENSSSCG00000041163	XLOC_000853	ssc-miR-1388	12_30217
ENSSSCG00000005023	ABHD12B	ENSSSCG00000041170	XLOC_000862	ssc-miR-139-3p	12_30296
ENSSSCG00000009541	ABHD13	ENSSSCG00000041171	XLOC_000866	ssc-miR-139-5p	12_30389
ENSSSCG00000030229	ABHD14A	ENSSSCG00000041180	XLOC_000878	ssc-miR-140-3p	12_30573
ENSSSCG00000042259	ABHD14B	ENSSSCG00000041187	XLOC_000961	ssc-miR-140-5p	12_30586
ENSSSCG00000017789	ABHD15	ENSSSCG00000041189	XLOC_000995	ssc-miR-141	12_30937
ENSSSCG00000034923	ABHD16A	ENSSSCG00000041195	XLOC_000996	ssc-miR-142-3p	12_30939
ENSSSCG00000013442	ABHD17A	ENSSSCG00000041214	XLOC_001001	ssc-miR-142-5p	12_30967
ENSSSCG00000021802	ABHD17B	ENSSSCG00000041219	XLOC_001005	ssc-miR-143-3p	12_31139
ENSSSCG00000001782	ABHD17C	ENSSSCG00000041238	XLOC_001030	ssc-miR-143-5p	12_31157
ENSSSCG00000009074	ABHD18	ENSSSCG00000041241	XLOC_001054	ssc-miR-144	12_31158
ENSSSCG00000001835	ABHD2	ENSSSCG00000041263	XLOC_001061	ssc-miR-145-3p	12_31204
ENSSSCG00000028010	ABHD3	ENSSSCG00000041266	XLOC_001062	ssc-miR-145-5p	12_31221
ENSSSCG00000002051	ABHD4	ENSSSCG00000041267	XLOC_001093	ssc-miR-1468	12_31458
ENSSSCG00000011297	ABHD5	ENSSSCG00000041304	XLOC_001103	ssc-miR-146a-5p	12_31559
ENSSSCG00000011470	ABHD6	ENSSSCG00000041310	XLOC_001107	ssc-miR-146b	12_31718
ENSSSCG00000031877	ABHD8	ENSSSCG00000041317	XLOC_001108	ssc-miR-148a-3p	12_31792
ENSSSCG00000024127	ABI1	ENSSSCG00000041327	XLOC_001109	ssc-miR-148a-5p	12_31793
ENSSSCG00000034630	ABI2	ENSSSCG00000041366	XLOC_001115	ssc-miR-148b-3p	12_31847
ENSSSCG00000011959	ABI3BP	ENSSSCG00000041385	XLOC_001139	ssc-miR-148b-5p	12_31890
ENSSSCG00000005706	ABL1	ENSSSCG00000041401	XLOC_001157	ssc-miR-149	12_31983
ENSSSCG00000024674	ABL2	ENSSSCG00000041410	XLOC_001215	ssc-miR-150	12_32000
ENSSSCG00000010651	ABLIM1	ENSSSCG00000041434	XLOC_001218	ssc-miR-151-3p	12_32053
ENSSSCG00000008721	ABLIM2	ENSSSCG00000041449	XLOC_001219	ssc-miR-151-5p	12_32072
ENSSSCG00000014430	ABLIM3	ENSSSCG00000041461	XLOC_001240	ssc-miR-152	12_32252
ENSSSCG00000017804	ABR	ENSSSCG00000041471	XLOC_001252	ssc-miR-153	12_32454
ENSSSCG00000004145	ABRACL	ENSSSCG00000041487	XLOC_001253	ssc-miR-155-5p	12_32476
ENSSSCG00000009234	ABRAXAS1	ENSSSCG00000041508	XLOC_001254	ssc-miR-15a	13_32597
ENSSSCG00000010737	ABRAXAS2	ENSSSCG00000041523	XLOC_001292	ssc-miR-15b	13_32628
ENSSSCG00000038191	ABT1	ENSSSCG00000041533	XLOC_001316	ssc-miR-16	13_32643
ENSSSCG00000024827	ABTB1	ENSSSCG00000041536	XLOC_001317	ssc-miR-17-3p	13_32644
ENSSSCG00000013303	ABTB2	ENSSSCG00000041566	XLOC_001327	ssc-miR-17-5p	13_32732
ENSSSCG00000000162	ABTB3	ENSSSCG00000041575	XLOC_001365	ssc-miR-181a	13_32747
ENSSSCG00000011250	ACAA1	ENSSSCG00000041576	XLOC_001369	ssc-miR-181b	13_32757
ENSSSCG00000004510	ACAA2	ENSSSCG00000041587	XLOC_001373	ssc-miR-181c	13_32758
ENSSSCG00000017694	ACACA	ENSSSCG00000041588	XLOC_001402	ssc-miR-181d-5p	13_33072
ENSSSCG00000061436	ACACB	ENSSSCG00000041589	XLOC_001404	ssc-miR-182	13_33106
ENSSSCG00000009836	ACAD10	ENSSSCG00000041698	XLOC_001412	ssc-miR-183	13_33379
ENSSSCG00000011629	ACAD11	ENSSSCG00000041701	XLOC_001435	ssc-miR-1839-3p	13_33747
ENSSSCG00000062444	ACAD8	ENSSSCG00000041710	XLOC_001443	ssc-miR-1839-5p	13_33748
ENSSSCG00000023354	ACAD9	ENSSSCG00000041715	XLOC_001451	ssc-miR-184	13_33780
ENSSSCG00000016156	ACADL	ENSSSCG00000041717	XLOC_001452	ssc-miR-1842	13_33887
ENSSSCG00000003776	ACADM	ENSSSCG00000041720	XLOC_001453	ssc-miR-185	13_33916
ENSSSCG00000009916	ACADS	ENSSSCG00000041735	XLOC_001455	ssc-miR-186-5p	13_33980
ENSSSCG00000010723	ACADSB	ENSSSCG00000041751	XLOC_001462	ssc-miR-187	13_34207
ENSSSCG00000017947	ACADVL	ENSSSCG00000041765	XLOC_001466	ssc-miR-18a	13_34208
ENSSSCG00000017943	ACAP1	ENSSSCG00000041766	XLOC_001467	ssc-miR-18b	13_34236
ENSSSCG00000031147	ACAP2	ENSSSCG00000041768	XLOC_001479	ssc-miR-190a	13_34304
ENSSSCG00000003329	ACAP3	ENSSSCG00000041793	XLOC_001480	ssc-miR-190b	13_34313
ENSSSCG00000026153	ACAT1	ENSSSCG00000041810	XLOC_001481	ssc-miR-191	13_34354
ENSSSCG00000004049	ACAT2	ENSSSCG00000041827	XLOC_001491	ssc-miR-192	13_34365
ENSSSCG00000024180	ACBD3	ENSSSCG00000041895	XLOC_001504	ssc-miR-193a-3p	13_34470
ENSSSCG00000017337	ACBD4	ENSSSCG00000041898	XLOC_001505	ssc-miR-193a-5p	13_34516
ENSSSCG00000011064	ACBD5	ENSSSCG00000041916	XLOC_001513	ssc-miR-194a-3p	13_34559
ENSSSCG00000015534	ACBD6	ENSSSCG00000041958	XLOC_001514	ssc-miR-194a-5p	13_34888
ENSSSCG00000038184	ACBD7	ENSSSCG00000041959	XLOC_001518	ssc-miR-194b-3p	13_35044
ENSSSCG00000013282	ACCS	ENSSSCG00000041979	XLOC_001524	ssc-miR-194b-5p	13_35076
ENSSSCG00000057793	ACCSL	ENSSSCG00000041983	XLOC_001529	ssc-miR-195	13_35355
ENSSSCG00000029590	ACD	ENSSSCG00000041985	XLOC_001571	ssc-miR-196a	13_35447
ENSSSCG00000017296	ACE	ENSSSCG00000041994	XLOC_001575	ssc-miR-196b-5p	13_35571
ENSSSCG00000012138	ACE2	ENSSSCG00000041997	XLOC_001581	ssc-miR-199a-3p	14_35749
ENSSSCG00000034213	ACER2	ENSSSCG00000041999	XLOC_001622	ssc-miR-199a-5p	14_35821
ENSSSCG00000032723	ACER3	ENSSSCG00000042005	XLOC_001624	ssc-miR-199b-3p	14_35926
ENSSSCG00000030303	ACHE	ENSSSCG00000042012	XLOC_001648	ssc-miR-199b-5p	14_36009
ENSSSCG00000036223	ACKR1	ENSSSCG00000042025	XLOC_001660	ssc-miR-19a	14_36373
ENSSSCG00000031154	ACKR2	ENSSSCG00000042041	XLOC_001670	ssc-miR-19b	14_36591
ENSSSCG00000016322	ACKR3	ENSSSCG00000042044	XLOC_001684	ssc-miR-200b	14_36597
ENSSSCG00000011630	ACKR4	ENSSSCG00000042051	XLOC_001685	ssc-miR-202-5p	14_36690
ENSSSCG00000017421	ACLY	ENSSSCG00000042062	XLOC_001711	ssc-miR-204	14_36758
ENSSSCG00000015699	ACMSD	ENSSSCG00000042064	XLOC_001733	ssc-miR-205	14_36920
ENSSSCG00000023807	ACO1	ENSSSCG00000042069	XLOC_001738	ssc-miR-206	14_37121
ENSSSCG00000000064	ACO2	ENSSSCG00000042095	XLOC_001759	ssc-miR-20a-3p	14_37147
ENSSSCG00000009469	ACOD1	ENSSSCG00000042098	XLOC_001765	ssc-miR-20a-5p	14_37161
ENSSSCG00000037559	ACOT11	ENSSSCG00000042107	XLOC_001778	ssc-miR-20b	14_37162
ENSSSCG00000036095	ACOT12	ENSSSCG00000042114	XLOC_001782	ssc-miR-210	14_37179
ENSSSCG00000036411	ACOT13	ENSSSCG00000042119	XLOC_001816	ssc-miR-212	14_37184
ENSSSCG00000002348	ACOT6	ENSSSCG00000042126	XLOC_001818	ssc-miR-21-3p	14_37322
ENSSSCG00000003377	ACOT7	ENSSSCG00000042151	XLOC_001860	ssc-miR-214-3p	14_37360
ENSSSCG00000007426	ACOT8	ENSSSCG00000042172	XLOC_001894	ssc-miR-214-5p	14_37554
ENSSSCG00000012172	ACOT9	ENSSSCG00000042179	XLOC_001917	ssc-miR-215	14_37607
ENSSSCG00000017198	ACOX1	ENSSSCG00000042189	XLOC_001930	ssc-miR-21-5p	14_37689
ENSSSCG00000011477	ACOX2	ENSSSCG00000042206	XLOC_001939	ssc-miR-216	14_37963
ENSSSCG00000008724	ACOX3	ENSSSCG00000042222	XLOC_001949	ssc-miR-217	14_37989
ENSSSCG00000008659	ACP1	ENSSSCG00000042230	XLOC_001950	ssc-miR-218	14_37990
ENSSSCG00000013242	ACP2	ENSSSCG00000042233	XLOC_001952	ssc-miR-218-5p	14_38010
ENSSSCG00000011627	ACP3	ENSSSCG00000042234	XLOC_001953	ssc-miR-218b	14_38096
ENSSSCG00000024736	ACP4	ENSSSCG00000042243	XLOC_001977	ssc-miR-219a	14_38154
ENSSSCG00000032282	ACP5	ENSSSCG00000042264	XLOC_001983	ssc-miR-221-3p	14_38190
ENSSSCG00000006697	ACP6	ENSSSCG00000042273	XLOC_001987	ssc-miR-221-5p	14_38380
ENSSSCG00000000700	ACRBP	ENSSSCG00000042281	XLOC_001991	ssc-miR-222	14_38437
ENSSSCG00000001760	ACSBG1	ENSSSCG00000042315	XLOC_001992	ssc-miR-223	15_38783
ENSSSCG00000017566	ACSF2	ENSSSCG00000042318	XLOC_001997	ssc-miR-22-3p	15_38794
ENSSSCG00000023866	ACSF3	ENSSSCG00000042319	XLOC_002069	ssc-miR-224	15_38816
ENSSSCG00000015784	ACSL1	ENSSSCG00000042325	XLOC_002071	ssc-miR-22-5p	15_38823
ENSSSCG00000016223	ACSL3	ENSSSCG00000042329	XLOC_002072	ssc-miR-2320-3p	15_39125
ENSSSCG00000012583	ACSL4	ENSSSCG00000042339	XLOC_002075	ssc-miR-2320-5p	15_39878
ENSSSCG00000031789	ACSL5	ENSSSCG00000042348	XLOC_002098	ssc-miR-2366	15_39891
ENSSSCG00000014272	ACSL6	ENSSSCG00000042361	XLOC_002105	ssc-miR-23a	15_39908
ENSSSCG00000007857	ACSM3	ENSSSCG00000042369	XLOC_002186	ssc-miR-23b	15_39911
ENSSSCG00000030033	ACSM4	ENSSSCG00000042371	XLOC_002213	ssc-miR-2411	15_40627
ENSSSCG00000007133	ACSS1	ENSSSCG00000042374	XLOC_002219	ssc-miR-24-1-5p	15_40720
ENSSSCG00000007286	ACSS2	ENSSSCG00000042386	XLOC_002224	ssc-miR-24-2-5p	16_40863
ENSSSCG00000000939	ACSS3	ENSSSCG00000042400	XLOC_002238	ssc-miR-24-3p	16_40870
ENSSSCG00000010447	ACTA2	ENSSSCG00000042401	XLOC_002250	ssc-miR-2483	16_41023
ENSSSCG00000007585	ACTB	ENSSSCG00000042402	XLOC_002290	ssc-miR-26a	16_41081
ENSSSCG00000004803	ACTC1	ENSSSCG00000042412	XLOC_002322	ssc-miR-26b-3p	16_41265
ENSSSCG00000028355	ACTG1	ENSSSCG00000042418	XLOC_002354	ssc-miR-26b-5p	16_41268
ENSSSCG00000008294	ACTG2	ENSSSCG00000042425	XLOC_002360	ssc-miR-27a	16_41310
ENSSSCG00000044750	ACTL10	ENSSSCG00000042429	XLOC_002469	ssc-miR-27b-3p	16_41491
ENSSSCG00000011762	ACTL6A	ENSSSCG00000042438	XLOC_002499	ssc-miR-27b-5p	16_41509
ENSSSCG00000036702	ACTN1	ENSSSCG00000042444	XLOC_002519	ssc-miR-28-3p	16_41511
ENSSSCG00000010144	ACTN2	ENSSSCG00000042468	XLOC_002572	ssc-miR-28-5p	16_41513
ENSSSCG00000002965	ACTN4	ENSSSCG00000042487	XLOC_002579	ssc-miR-296-3p	16_41592
ENSSSCG00000022299	ACTR10	ENSSSCG00000042491	XLOC_002580	ssc-miR-299	16_41626
ENSSSCG00000010585	ACTR1A	ENSSSCG00000042502	XLOC_002583	ssc-miR-29a-3p	17_41902
ENSSSCG00000008194	ACTR1B	ENSSSCG00000042510	XLOC_002615	ssc-miR-29a-5p	17_42078
ENSSSCG00000008358	ACTR2	ENSSSCG00000042530	XLOC_002616	ssc-miR-29b	17_42222
ENSSSCG00000015710	ACTR3	ENSSSCG00000042534	XLOC_002621	ssc-miR-29c	17_42424
ENSSSCG00000007349	ACTR5	ENSSSCG00000042540	XLOC_002629	ssc-miR-301	17_42426
ENSSSCG00000025682	ACTR6	ENSSSCG00000042543	XLOC_002645	ssc-miR-30a-3p	17_42712
ENSSSCG00000011458	ACTR8	ENSSSCG00000042551	XLOC_002666	ssc-miR-30a-5p	17_42884
ENSSSCG00000039994	ACTRT3	ENSSSCG00000042581	XLOC_002745	ssc-miR-30b-3p	17_42922
ENSSSCG00000015874	ACVR1	ENSSSCG00000042590	XLOC_002746	ssc-miR-30b-5p	17_42940
ENSSSCG00000000233	ACVR1B	ENSSSCG00000042592	XLOC_002747	ssc-miR-30c-1-3p	18_42970
ENSSSCG00000015873	ACVR1C	ENSSSCG00000042601	XLOC_002751	ssc-miR-30c-3p	18_42974
ENSSSCG00000015669	ACVR2A	ENSSSCG00000042603	XLOC_002754	ssc-miR-30c-5p	18_42980
ENSSSCG00000011257	ACVR2B	ENSSSCG00000042615	XLOC_002766	ssc-miR-30d	18_43042
ENSSSCG00000000232	ACVRL1	ENSSSCG00000042617	XLOC_002805	ssc-miR-30e-3p	18_43144
ENSSSCG00000023325	ACY1	ENSSSCG00000042638	XLOC_002809	ssc-miR-30e-5p	18_43152
ENSSSCG00000025224	ACYP2	ENSSSCG00000042639	XLOC_002813	ssc-miR-31	18_43196
ENSSSCG00000021255	ADA	ENSSSCG00000042641	XLOC_002865	ssc-miR-32	18_43430
ENSSSCG00000035218	ADA2	ENSSSCG00000042663	XLOC_002876	ssc-miR-320	18_43512
ENSSSCG00000004710	ADAL	ENSSSCG00000042682	XLOC_002880	ssc-miR-323	18_43658
ENSSSCG00000004595	ADAM10	ENSSSCG00000042692	XLOC_002890	ssc-miR-324	18_43715
ENSSSCG00000010746	ADAM12	ENSSSCG00000042700	XLOC_002908	ssc-miR-325	18_43800
ENSSSCG00000006533	ADAM15	ENSSSCG00000042705	XLOC_002913	ssc-miR-326	2_3896
ENSSSCG00000008641	ADAM17	ENSSSCG00000042711	XLOC_002919	ssc-miR-328	2_3937
ENSSSCG00000017052	ADAM19	ENSSSCG00000042712	XLOC_002924	ssc-miR-330	2_3947
ENSSSCG00000015297	ADAM22	ENSSSCG00000042713	XLOC_002926	ssc-miR-331-3p	2_4097
ENSSSCG00000016131	ADAM23	ENSSSCG00000042714	XLOC_002933	ssc-miR-331-5p	2_4168
ENSSSCG00000009644	ADAM28	ENSSSCG00000042715	XLOC_002936	ssc-miR-335	2_4194
ENSSSCG00000015807	ADAM32	ENSSSCG00000042721	XLOC_002938	ssc-miR-338	2_4199
ENSSSCG00000007145	ADAM33	ENSSSCG00000042725	XLOC_003023	ssc-miR-339	2_4235
ENSSSCG00000010772	ADAM8	ENSSSCG00000042741	XLOC_003053	ssc-miR-339-3p	2_4485
ENSSSCG00000015808	ADAM9	ENSSSCG00000042769	XLOC_003055	ssc-miR-339-5p	2_4537
ENSSSCG00000009645	ADAMDEC1	ENSSSCG00000042777	XLOC_003056	ssc-miR-33b-3p	2_4710
ENSSSCG00000012026	ADAMTS1	ENSSSCG00000042787	XLOC_003057	ssc-miR-340	2_4871
ENSSSCG00000026994	ADAMTS10	ENSSSCG00000042788	XLOC_003064	ssc-miR-342	2_4967
ENSSSCG00000016816	ADAMTS12	ENSSSCG00000042798	XLOC_003074	ssc-miR-345-3p	2_5153
ENSSSCG00000021241	ADAMTS13	ENSSSCG00000042799	XLOC_003075	ssc-miR-345-5p	2_5283
ENSSSCG00000010272	ADAMTS14	ENSSSCG00000042826	XLOC_003082	ssc-miR-34a	2_5405
ENSSSCG00000015250	ADAMTS15	ENSSSCG00000042837	XLOC_003086	ssc-miR-34c	2_5409
ENSSSCG00000017109	ADAMTS16	ENSSSCG00000042842	XLOC_003090	ssc-miR-361-3p	2_5427
ENSSSCG00000038452	ADAMTS17	ENSSSCG00000042854	XLOC_003137	ssc-miR-361-5p	2_5454
ENSSSCG00000014259	ADAMTS19	ENSSSCG00000042861	XLOC_003170	ssc-miR-362	2_5498
ENSSSCG00000024043	ADAMTS2	ENSSSCG00000042862	XLOC_003187	ssc-miR-363	2_5594
ENSSSCG00000000795	ADAMTS20	ENSSSCG00000042873	XLOC_003206	ssc-miR-365-3p	2_5731
ENSSSCG00000038180	ADAMTS3	ENSSSCG00000042888	XLOC_003231	ssc-miR-365-5p	2_6134
ENSSSCG00000006359	ADAMTS4	ENSSSCG00000042889	XLOC_003240	ssc-miR-369	2_6260
ENSSSCG00000012027	ADAMTS5	ENSSSCG00000042893	XLOC_003247	ssc-miR-370	2_6265
ENSSSCG00000016943	ADAMTS6	ENSSSCG00000042913	XLOC_003260	ssc-miR-374a-3p	2_6282
ENSSSCG00000001765	ADAMTS7	ENSSSCG00000042918	XLOC_003313	ssc-miR-374a-5p	2_6371
ENSSSCG00000015249	ADAMTS8	ENSSSCG00000042921	XLOC_003321	ssc-miR-374b-3p	2_6660
ENSSSCG00000011496	ADAMTS9	ENSSSCG00000042940	XLOC_003356	ssc-miR-374b-5p	2_6795
ENSSSCG00000040366	ADAMTSL1	ENSSSCG00000042951	XLOC_003364	ssc-miR-375	2_6796
ENSSSCG00000026425	ADAMTSL2	ENSSSCG00000042962	XLOC_003373	ssc-miR-376a-3p	2_6913
ENSSSCG00000001793	ADAMTSL3	ENSSSCG00000042972	XLOC_003389	ssc-miR-376a-5p	2_6960
ENSSSCG00000006651	ADAMTSL4	ENSSSCG00000043011	XLOC_003394	ssc-miR-376c	2_7056
ENSSSCG00000013433	ADAMTSL5	ENSSSCG00000043013	XLOC_003404	ssc-miR-378	2_7093
ENSSSCG00000007547	ADAP1	ENSSSCG00000043014	XLOC_003428	ssc-miR-378b-3p	2_7114
ENSSSCG00000017738	ADAP2	ENSSSCG00000043021	XLOC_003430	ssc-miR-381-3p	2_7157
ENSSSCG00000006543	ADAR	ENSSSCG00000043056	XLOC_003431	ssc-miR-381-5p	2_7244
ENSSSCG00000012089	ADARB1	ENSSSCG00000043057	XLOC_003432	ssc-miR-382	2_7324
ENSSSCG00000011160	ADARB2	ENSSSCG00000043066	XLOC_003452	ssc-miR-411	2_7411
ENSSSCG00000002706	ADAT1	ENSSSCG00000043068	XLOC_003475	ssc-miR-421-3p	2_7414
ENSSSCG00000039598	ADAT2	ENSSSCG00000043074	XLOC_003511	ssc-miR-423-3p	2_7969
ENSSSCG00000038810	ADAT3	ENSSSCG00000043123	XLOC_003512	ssc-miR-423-5p	2_7992
ENSSSCG00000002408	ADCK1	ENSSSCG00000043129	XLOC_003514	ssc-miR-424-3p	2_7995
ENSSSCG00000016496	ADCK2	ENSSSCG00000043130	XLOC_003519	ssc-miR-424-5p	2_8065
ENSSSCG00000005907	ADCK5	ENSSSCG00000043135	XLOC_003522	ssc-miR-425-3p	2_8092
ENSSSCG00000016726	ADCY1	ENSSSCG00000043139	XLOC_003533	ssc-miR-425-5p	2_8093
ENSSSCG00000006305	ADCY10	ENSSSCG00000043166	XLOC_003544	ssc-miR-429	2_8128
ENSSSCG00000017101	ADCY2	ENSSSCG00000043175	XLOC_003565	ssc-miR-432-5p	3_10012
ENSSSCG00000008578	ADCY3	ENSSSCG00000043189	XLOC_003572	ssc-miR-4331-3p	3_10013
ENSSSCG00000001988	ADCY4	ENSSSCG00000043200	XLOC_003574	ssc-miR-4331-5p	3_10015
ENSSSCG00000027952	ADCY5	ENSSSCG00000043202	XLOC_003575	ssc-miR-4332	3_10016
ENSSSCG00000000175	ADCY6	ENSSSCG00000043207	XLOC_003582	ssc-miR-4334-3p	3_10052
ENSSSCG00000039408	ADCY7	ENSSSCG00000043222	XLOC_003587	ssc-miR-450a	3_10053
ENSSSCG00000031717	ADCY8	ENSSSCG00000043234	XLOC_003590	ssc-miR-450b-3p	3_10094
ENSSSCG00000007950	ADCY9	ENSSSCG00000043245	XLOC_003591	ssc-miR-450b-5p	3_10184
ENSSSCG00000035186	ADCYAP1	ENSSSCG00000043271	XLOC_003602	ssc-miR-450c-3p	3_10212
ENSSSCG00000016672	ADCYAP1R1	ENSSSCG00000043312	XLOC_003620	ssc-miR-450c-5p	3_10266
ENSSSCG00000008692	ADD1	ENSSSCG00000043328	XLOC_003623	ssc-miR-451	3_10285
ENSSSCG00000020736	ADD2	ENSSSCG00000043377	XLOC_003639	ssc-miR-452	3_10387
ENSSSCG00000010621	ADD3	ENSSSCG00000043386	XLOC_003642	ssc-miR-454	3_10447
ENSSSCG00000004114	ADGB	ENSSSCG00000043391	XLOC_003646	ssc-miR-455-3p	3_10533
ENSSSCG00000015825	ADGRA2	ENSSSCG00000043447	XLOC_003647	ssc-miR-455-5p	3_10656
ENSSSCG00000008753	ADGRA3	ENSSSCG00000043455	XLOC_003655	ssc-miR-486	3_10992
ENSSSCG00000035891	ADGRB1	ENSSSCG00000043456	XLOC_003711	ssc-miR-487b	3_11157
ENSSSCG00000003604	ADGRB2	ENSSSCG00000043486	XLOC_003723	ssc-miR-490	3_11259
ENSSSCG00000004270	ADGRB3	ENSSSCG00000043487	XLOC_003725	ssc-miR-490-3p	3_11287
ENSSSCG00000009745	ADGRD1	ENSSSCG00000043503	XLOC_003733	ssc-miR-490-5p	3_8285
ENSSSCG00000013787	ADGRE3	ENSSSCG00000043509	XLOC_003735	ssc-miR-491	3_8369
ENSSSCG00000013775	ADGRE5	ENSSSCG00000043552	XLOC_003737	ssc-miR-493-3p	3_8473
ENSSSCG00000001726	ADGRF1	ENSSSCG00000043555	XLOC_003756	ssc-miR-493-5p	3_8523
ENSSSCG00000001725	ADGRF5	ENSSSCG00000043561	XLOC_003759	ssc-miR-497	3_8542
ENSSSCG00000002815	ADGRG1	ENSSSCG00000043563	XLOC_003760	ssc-miR-499-5p	3_8543
ENSSSCG00000029756	ADGRG2	ENSSSCG00000043569	XLOC_003776	ssc-miR-500-3p	3_8717
ENSSSCG00000002814	ADGRG3	ENSSSCG00000043586	XLOC_003785	ssc-miR-500-5p	3_8767
ENSSSCG00000025503	ADGRG5	ENSSSCG00000043604	XLOC_003874	ssc-miR-503	3_8824
ENSSSCG00000004139	ADGRG6	ENSSSCG00000043608	XLOC_003878	ssc-miR-504	3_8855
ENSSSCG00000011962	ADGRG7	ENSSSCG00000043613	XLOC_003885	ssc-miR-505	3_8935
ENSSSCG00000013773	ADGRL1	ENSSSCG00000043626	XLOC_003919	ssc-miR-532-3p	3_8976
ENSSSCG00000003761	ADGRL2	ENSSSCG00000043636	XLOC_003927	ssc-miR-532-5p	3_9163
ENSSSCG00000026129	ADGRL3	ENSSSCG00000043666	XLOC_003972	ssc-miR-542-3p	3_9189
ENSSSCG00000003762	ADGRL4	ENSSSCG00000043688	XLOC_004018	ssc-miR-542-5p	3_9208
ENSSSCG00000035025	ADGRV1	ENSSSCG00000043700	XLOC_004021	ssc-miR-545-5p	3_9310
ENSSSCG00000009184	ADH4	ENSSSCG00000043719	XLOC_004022	ssc-miR-551a	3_9517
ENSSSCG00000009185	ADH5	ENSSSCG00000043723	XLOC_004026	ssc-miR-574-3p	3_9786
ENSSSCG00000006213	ADHFE1	ENSSSCG00000043724	XLOC_004027	ssc-miR-574-5p	3_9871
ENSSSCG00000029161	ADI1	ENSSSCG00000043726	XLOC_004037	ssc-miR-582-3p	3_9917
ENSSSCG00000010931	ADIPOR1	ENSSSCG00000043728	XLOC_004075	ssc-miR-582-5p	3_9920
ENSSSCG00000000757	ADIPOR2	ENSSSCG00000043763	XLOC_004094	ssc-miR-615	4_11336
ENSSSCG00000037918	ADIRF	ENSSSCG00000043766	XLOC_004099	ssc-miR-628-3p	4_11338
ENSSSCG00000010315	ADK	ENSSSCG00000043799	XLOC_004114	ssc-miR-628-5p	4_11410
ENSSSCG00000013408	ADM	ENSSSCG00000043814	XLOC_004117	ssc-miR-6516	4_11415
ENSSSCG00000007473	ADNP	ENSSSCG00000043820	XLOC_004217	ssc-miR-652	4_11522
ENSSSCG00000038632	ADNP2	ENSSSCG00000043867	XLOC_004231	ssc-miR-6529	4_11739
ENSSSCG00000031360	ADO	ENSSSCG00000043870	XLOC_004235	ssc-miR-660	4_11802
ENSSSCG00000021059	ADORA1	ENSSSCG00000043918	XLOC_004271	ssc-miR-664-3p	4_11923
ENSSSCG00000010054	ADORA2A	ENSSSCG00000043928	XLOC_004334	ssc-miR-664-5p	4_12190
ENSSSCG00000035051	ADORA2B	ENSSSCG00000043931	XLOC_004342	ssc-miR-670	4_12225
ENSSSCG00000006788	ADORA3	ENSSSCG00000043940	XLOC_004362	ssc-miR-671-3p	4_12246
ENSSSCG00000001925	ADPGK	ENSSSCG00000043967	XLOC_004415	ssc-miR-671-5p	4_12606
ENSSSCG00000011896	ADPRH	ENSSSCG00000044001	XLOC_004426	ssc-miR-676-3p	4_12678
ENSSSCG00000018009	ADPRM	ENSSSCG00000044003	XLOC_004427	ssc-miR-676-5p	4_12701
ENSSSCG00000003634	ADPRS	ENSSSCG00000044004	XLOC_004452	ssc-miR-6782-3p	4_12702
ENSSSCG00000009661	ADRA1A	ENSSSCG00000044011	XLOC_004495	ssc-miR-708-3p	4_12731
ENSSSCG00000007139	ADRA1D	ENSSSCG00000044016	XLOC_004517	ssc-miR-708-5p	4_12848
ENSSSCG00000010629	ADRA2A	ENSSSCG00000044023	XLOC_004521	ssc-miR-7134-3p	4_13561
ENSSSCG00000008122	ADRA2B	ENSSSCG00000044035	XLOC_004523	ssc-miR-7134-5p	4_13672
ENSSSCG00000008703	ADRA2C	ENSSSCG00000044065	XLOC_004525	ssc-miR-7135-3p	4_13683
ENSSSCG00000010647	ADRB1	ENSSSCG00000044075	XLOC_004542	ssc-miR-7135-5p	4_13698
ENSSSCG00000052586	ADRB2	ENSSSCG00000044103	XLOC_004565	ssc-miR-7136-5p	4_13824
ENSSSCG00000038718	ADRM1	ENSSSCG00000044124	XLOC_004566	ssc-miR-7137-3p	5_14035
ENSSSCG00000000077	ADSL	ENSSSCG00000044136	XLOC_004568	ssc-miR-7137-5p	5_14036
ENSSSCG00000037334	ADSS1	ENSSSCG00000044153	XLOC_004572	ssc-miR-7138-5p	5_14041
ENSSSCG00000010874	ADSS2	ENSSSCG00000044174	XLOC_004584	ssc-miR-7139-3p	5_14075
ENSSSCG00000001048	ADTRP	ENSSSCG00000044191	XLOC_004614	ssc-miR-7139-5p	5_14615
ENSSSCG00000016754	AEBP1	ENSSSCG00000044205	XLOC_004634	ssc-miR-7140-3p	5_14621
ENSSSCG00000000587	AEBP2	ENSSSCG00000044206	XLOC_004637	ssc-miR-7141-5p	5_14957
ENSSSCG00000005102	AEN	ENSSSCG00000044223	XLOC_004697	ssc-miR-7142-3p	5_15070
ENSSSCG00000023907	AFAP1	ENSSSCG00000044236	XLOC_004711	ssc-miR-7143-3p	5_15317
ENSSSCG00000014431	AFAP1L1	ENSSSCG00000044237	XLOC_004729	ssc-miR-7144-5p	5_15322
ENSSSCG00000010650	AFAP1L2	ENSSSCG00000044246	XLOC_004746	ssc-miR-7-3p	5_15327
ENSSSCG00000004018	AFDN	ENSSSCG00000044255	XLOC_004763	ssc-miR-744	5_15342
ENSSSCG00000023593	AFF1	ENSSSCG00000044256	XLOC_004771	ssc-miR-758	5_15343
ENSSSCG00000012730	AFF2	ENSSSCG00000044268	XLOC_004774	ssc-miR-7-5p	5_15386
ENSSSCG00000055832	AFF3	ENSSSCG00000044292	XLOC_004782	ssc-miR-769-3p	5_15407
ENSSSCG00000014291	AFF4	ENSSSCG00000044308	XLOC_004795	ssc-miR-769-5p	5_15467
ENSSSCG00000040199	AFG1L	ENSSSCG00000044318	XLOC_004819	ssc-miR-7857-3p	5_15501
ENSSSCG00000022947	AFG3L2	ENSSSCG00000044323	XLOC_004828	ssc-miR-802	5_15502
ENSSSCG00000033636	AFMID	ENSSSCG00000044342	XLOC_004829	ssc-miR-874	5_15655
ENSSSCG00000008949	AFP	ENSSSCG00000044344	XLOC_004858	ssc-miR-885-3p	5_15668
ENSSSCG00000008363	AFTPH	ENSSSCG00000044361	XLOC_004881	ssc-miR-885-5p	5_15780
ENSSSCG00000015772	AGA	ENSSSCG00000044363	XLOC_004882	ssc-miR-9	5_15836
ENSSSCG00000016317	AGAP1	ENSSSCG00000044372	XLOC_004888	ssc-miR-9-1	5_15973
ENSSSCG00000038732	AGAP2	ENSSSCG00000044383	XLOC_004891	ssc-miR-9-2	5_16074
ENSSSCG00000025610	AGAP3	ENSSSCG00000044385	XLOC_004897	ssc-miR-92a	5_16115
ENSSSCG00000040838	AGBL2	ENSSSCG00000044418	XLOC_004898	ssc-miR-92b-3p	5_16149
ENSSSCG00000053763	AGBL3	ENSSSCG00000044428	XLOC_004909	ssc-miR-92b-5p	5_16354
ENSSSCG00000008558	AGBL5	ENSSSCG00000044435	XLOC_004918	ssc-miR-935	5_16369
ENSSSCG00000001437	AGER	ENSSSCG00000044454	XLOC_004922	ssc-miR-95	6_16468
ENSSSCG00000016248	AGFG1	ENSSSCG00000044457	XLOC_004924	ssc-miR-96-5p	6_16469
ENSSSCG00000007664	AGFG2	ENSSSCG00000044465	XLOC_004948	ssc-miR-9788-3p	6_16472
ENSSSCG00000014094	AGGF1	ENSSSCG00000044483	XLOC_004985	ssc-miR-98	6_16501
ENSSSCG00000016492	AGK	ENSSSCG00000044484	XLOC_004990	ssc-miR-9841-3p	6_16525
ENSSSCG00000006872	AGL	ENSSSCG00000044492	XLOC_004993	ssc-miR-9843-3p	6_16526
ENSSSCG00000003463	AGMAT	ENSSSCG00000044500	XLOC_005013	ssc-miR-9851-3p	6_16562
ENSSSCG00000015356	AGMO	ENSSSCG00000044518	XLOC_005026	ssc-miR-9858-5p	6_16591
ENSSSCG00000005935	AGO2	ENSSSCG00000044522	XLOC_005033	ssc-miR-9860-5p	6_16617
ENSSSCG00000003630	AGO3	ENSSSCG00000044541	XLOC_005047	ssc-miR-99a-3p	6_16746
ENSSSCG00000001435	AGPAT1	ENSSSCG00000044546	XLOC_005120	ssc-miR-99a-5p	6_16969
ENSSSCG00000053941	AGPAT2	ENSSSCG00000044565	XLOC_005126	ssc-miR-99b	6_17100
ENSSSCG00000038081	AGPAT3	ENSSSCG00000044567	XLOC_005137		6_17101
ENSSSCG00000004033	AGPAT4	ENSSSCG00000044568	XLOC_005140		6_17157
ENSSSCG00000015755	AGPAT5	ENSSSCG00000044572	XLOC_005200		6_17159
ENSSSCG00000023983	AGPS	ENSSSCG00000044575	XLOC_005222		6_17160
ENSSSCG00000015363	AGR2	ENSSSCG00000044582	XLOC_005228		6_17360
ENSSSCG00000022204	AGRN	ENSSSCG00000044588	XLOC_005253		6_17361
ENSSSCG00000010184	AGT	ENSSSCG00000044592	XLOC_005254		6_17395
ENSSSCG00000010957	AGTPBP1	ENSSSCG00000044627	XLOC_005255		6_17431
ENSSSCG00000011695	AGTR1	ENSSSCG00000044633	XLOC_005272		6_17432
ENSSSCG00000012600	AGTR2	ENSSSCG00000044668	XLOC_005287		6_17451
ENSSSCG00000016829	AGXT2	ENSSSCG00000044669	XLOC_005290		6_17459
ENSSSCG00000010863	AHCTF1	ENSSSCG00000044694	XLOC_005291		6_17461
ENSSSCG00000007278	AHCY	ENSSSCG00000044696	XLOC_005318		6_17467
ENSSSCG00000006816	AHCYL1	ENSSSCG00000044713	XLOC_005323		6_17554
ENSSSCG00000016568	AHCYL2	ENSSSCG00000044736	XLOC_005367		6_17621
ENSSSCG00000004166	AHI1	ENSSSCG00000044764	XLOC_005375		6_17792
ENSSSCG00000030484	AHR	ENSSSCG00000044801	XLOC_005384		6_17853
ENSSSCG00000032843	AHRR	ENSSSCG00000044811	XLOC_005407		6_17895
ENSSSCG00000002406	AHSA1	ENSSSCG00000044841	XLOC_005457		6_17922
ENSSSCG00000037878	AHSP	ENSSSCG00000044846	XLOC_005459		6_18506
ENSSSCG00000000667	AICDA	ENSSSCG00000044851	XLOC_005483		6_18538
ENSSSCG00000010835	AIDA	ENSSSCG00000044892	XLOC_005484		6_18548
ENSSSCG00000032341	AIF1	ENSSSCG00000044907	XLOC_005502		6_18592
ENSSSCG00000034178	AIF1L	ENSSSCG00000044910	XLOC_005532		6_18629
ENSSSCG00000012657	AIFM1	ENSSSCG00000044913	XLOC_005535		6_18639
ENSSSCG00000010258	AIFM2	ENSSSCG00000044922	XLOC_005557		6_18666
ENSSSCG00000010096	AIFM3	ENSSSCG00000044931	XLOC_005562		6_18691
ENSSSCG00000004136	AIG1	ENSSSCG00000044939	XLOC_005566		6_18850
ENSSSCG00000024168	AIMP1	ENSSSCG00000044941	XLOC_005573		6_18869
ENSSSCG00000024245	AIMP2	ENSSSCG00000044949	XLOC_005579		6_19020
ENSSSCG00000062981	AIP	ENSSSCG00000044972	XLOC_005602		6_19201
ENSSSCG00000057521	AJM1	ENSSSCG00000044985	XLOC_005604		6_19257
ENSSSCG00000029201	AJUBA	ENSSSCG00000044996	XLOC_005605		6_19258
ENSSSCG00000005627	AK1	ENSSSCG00000045021	XLOC_005689		6_19304
ENSSSCG00000023595	AK3	ENSSSCG00000045037	XLOC_005695		6_19317
ENSSSCG00000003773	AK5	ENSSSCG00000045043	XLOC_005698		6_19499
ENSSSCG00000037053	AK6	ENSSSCG00000045052	XLOC_005710		6_19500
ENSSSCG00000002504	AK7	ENSSSCG00000045058	XLOC_005726		6_19524
ENSSSCG00000039188	AK8	ENSSSCG00000045062	XLOC_005733		6_19541
ENSSSCG00000056207	AKAIN1	ENSSSCG00000045064	XLOC_005772		6_19603
ENSSSCG00000034994	AKAP1	ENSSSCG00000045074	XLOC_005780		6_19622
ENSSSCG00000024030	AKAP10	ENSSSCG00000045093	XLOC_005791		6_19623
ENSSSCG00000009430	AKAP11	ENSSSCG00000045109	XLOC_005792		6_19684
ENSSSCG00000031733	AKAP12	ENSSSCG00000045125	XLOC_005809		6_19826
ENSSSCG00000032986	AKAP17A	ENSSSCG00000045128	XLOC_005844		6_19863
ENSSSCG00000000720	AKAP3	ENSSSCG00000045152	XLOC_005851		6_19904
ENSSSCG00000002268	AKAP5	ENSSSCG00000045154	XLOC_005868		6_19950
ENSSSCG00000024517	AKAP6	ENSSSCG00000045200	XLOC_005877		6_20074
ENSSSCG00000036790	AKAP7	ENSSSCG00000045223	XLOC_005887		6_20295
ENSSSCG00000013837	AKAP8	ENSSSCG00000045231	XLOC_005917		6_20352
ENSSSCG00000013838	AKAP8L	ENSSSCG00000045233	XLOC_005937		6_20363
ENSSSCG00000015310	AKAP9	ENSSSCG00000045252	XLOC_005951		6_20421
ENSSSCG00000033335	AKIP1	ENSSSCG00000045261	XLOC_005958		6_20447
ENSSSCG00000003652	AKIRIN1	ENSSSCG00000045267	XLOC_006005		7_20466
ENSSSCG00000004307	AKIRIN2	ENSSSCG00000045269	XLOC_006025		7_20496
ENSSSCG00000023894	AKNA	ENSSSCG00000045283	XLOC_006041		7_20675
ENSSSCG00000029256	AKR1A1	ENSSSCG00000045287	XLOC_006042		7_20897
ENSSSCG00000040608	AKR1B1	ENSSSCG00000045301	XLOC_006052		7_20937
ENSSSCG00000063387	AKR1C8	ENSSSCG00000045310	XLOC_006055		7_21288
ENSSSCG00000016519	AKR1D1	ENSSSCG00000045326	XLOC_006066		7_21313
ENSSSCG00000036941	AKR1E2	ENSSSCG00000045333	XLOC_006086		7_21449
ENSSSCG00000003491	AKR7A2	ENSSSCG00000045336	XLOC_006090		7_21450
ENSSSCG00000039139	AKT1	ENSSSCG00000045343	XLOC_006102		7_21480
ENSSSCG00000003194	AKT1S1	ENSSSCG00000045362	XLOC_006123		7_21495
ENSSSCG00000002989	AKT2	ENSSSCG00000045370	XLOC_006139		7_21500
ENSSSCG00000010872	AKT3	ENSSSCG00000045401	XLOC_006149		7_21525
ENSSSCG00000026181	AKTIP	ENSSSCG00000045404	XLOC_006163		7_21559
ENSSSCG00000032787	ALAD	ENSSSCG00000045405	XLOC_006203		7_21781
ENSSSCG00000011437	ALAS1	ENSSSCG00000045414	XLOC_006214		7_21846
ENSSSCG00000012347	ALAS2	ENSSSCG00000045438	XLOC_006256		7_21883
ENSSSCG00000011946	ALCAM	ENSSSCG00000045439	XLOC_006269		7_21962
ENSSSCG00000003168	ALDH16A1	ENSSSCG00000045444	XLOC_006271		7_22197
ENSSSCG00000010495	ALDH18A1	ENSSSCG00000045465	XLOC_006278		7_22267
ENSSSCG00000028996	ALDH1A1	ENSSSCG00000045471	XLOC_006286		7_22268
ENSSSCG00000025578	ALDH1A2	ENSSSCG00000045477	XLOC_006315		7_22286
ENSSSCG00000004822	ALDH1A3	ENSSSCG00000045498	XLOC_006316		7_22313
ENSSSCG00000005361	ALDH1B1	ENSSSCG00000045505	XLOC_006340		7_22517
ENSSSCG00000030626	ALDH1L1	ENSSSCG00000045536	XLOC_006358		7_22730
ENSSSCG00000000839	ALDH1L2	ENSSSCG00000045555	XLOC_006383		7_22875
ENSSSCG00000009889	ALDH2	ENSSSCG00000045580	XLOC_006399		7_23090
ENSSSCG00000018041	ALDH3A2	ENSSSCG00000045590	XLOC_006453		7_23209
ENSSSCG00000026349	ALDH3B2	ENSSSCG00000045608	XLOC_006461		7_23213
ENSSSCG00000024752	ALDH4A1	ENSSSCG00000045657	XLOC_006483		7_23439
ENSSSCG00000001090	ALDH5A1	ENSSSCG00000045667	XLOC_006531		7_23490
ENSSSCG00000002357	ALDH6A1	ENSSSCG00000045713	XLOC_006600		7_23643
ENSSSCG00000014247	ALDH7A1	ENSSSCG00000045731	XLOC_006602		7_23754
ENSSSCG00000032556	ALDOA	ENSSSCG00000045735	XLOC_006604		8_23771
ENSSSCG00000038300	ALDOB	ENSSSCG00000045742	XLOC_006615		8_23773
ENSSSCG00000017759	ALDOC	ENSSSCG00000045748	XLOC_006617		8_23792
ENSSSCG00000009381	ALG11	ENSSSCG00000045784	XLOC_006632		8_23812
ENSSSCG00000000980	ALG12	ENSSSCG00000045810	XLOC_006656		8_23813
ENSSSCG00000012586	ALG13	ENSSSCG00000045832	XLOC_006668		8_24025
ENSSSCG00000006885	ALG14	ENSSSCG00000045836	XLOC_006669		8_24305
ENSSSCG00000005383	ALG2	ENSSSCG00000045860	XLOC_006689		8_24374
ENSSSCG00000021319	ALG3	ENSSSCG00000045879	XLOC_006703		8_24591
ENSSSCG00000009360	ALG5	ENSSSCG00000045895	XLOC_006708		8_24677
ENSSSCG00000003815	ALG6	ENSSSCG00000045906	XLOC_006710		8_24731
ENSSSCG00000014887	ALG8	ENSSSCG00000045930	XLOC_006733		8_24773
ENSSSCG00000015023	ALG9	ENSSSCG00000046010	XLOC_006741		8_24846
ENSSSCG00000033922	ALKAL1	ENSSSCG00000046044	XLOC_006749		8_24966
ENSSSCG00000039057	ALKAL2	ENSSSCG00000046060	XLOC_006750		9_25602
ENSSSCG00000025906	ALKBH1	ENSSSCG00000046083	XLOC_006756		9_25674
ENSSSCG00000009940	ALKBH2	ENSSSCG00000046098	XLOC_006759		9_25915
ENSSSCG00000040937	ALKBH3	ENSSSCG00000046111	XLOC_006764		9_25956
ENSSSCG00000029300	ALKBH4	ENSSSCG00000046135	XLOC_006765		9_26359
ENSSSCG00000035120	ALKBH5	ENSSSCG00000046151	XLOC_006780		9_26397
ENSSSCG00000002910	ALKBH6	ENSSSCG00000046155	XLOC_006783		9_26739
ENSSSCG00000024254	ALKBH7	ENSSSCG00000046163	XLOC_006788		9_26740
ENSSSCG00000024628	ALKBH8	ENSSSCG00000046186	XLOC_006789		9_26871
ENSSSCG00000037977	ALMS1	ENSSSCG00000046194	XLOC_006793		9_26878
ENSSSCG00000060177	ALOX12	ENSSSCG00000046199	XLOC_006804		9_26920
ENSSSCG00000017923	ALOX15	ENSSSCG00000046203	XLOC_006819		9_27353
ENSSSCG00000010404	ALOX5	ENSSSCG00000046204	XLOC_006827		9_27589
ENSSSCG00000009330	ALOX5AP	ENSSSCG00000046209	XLOC_006830		9_27879
ENSSSCG00000031348	ALPK1	ENSSSCG00000046213	XLOC_029726		9_27888
ENSSSCG00000004918	ALPK2	ENSSSCG00000046214	XLOC_029735		AEMK02000264.1_46697
ENSSSCG00000041322	ALPK3	ENSSSCG00000046239	XLOC_029783		AEMK02000361.1_46313
ENSSSCG00000032607	ALPL	ENSSSCG00000046263	XLOC_029847		AEMK02000361.1_46314
ENSSSCG00000016109	ALS2	ENSSSCG00000046265	XLOC_029852		AEMK02000437.1_46909
ENSSSCG00000021997	ALS2CL	ENSSSCG00000046276	XLOC_029883		AEMK02000452.1_45900
ENSSSCG00000032655	ALYREF	ENSSSCG00000046277	XLOC_029886		AEMK02000452.1_45905
ENSSSCG00000008937	AMBN	ENSSSCG00000046278	XLOC_029926		AEMK02000452.1_45913
ENSSSCG00000005485	AMBP	ENSSSCG00000046318	XLOC_029936		AEMK02000452.1_45916
ENSSSCG00000013262	AMBRA1	ENSSSCG00000046323	XLOC_029956		AEMK02000452.1_45917
ENSSSCG00000008957	AMCF-II	ENSSSCG00000046349	XLOC_029985		AEMK02000452.1_45919
ENSSSCG00000000893	AMDHD1	ENSSSCG00000046363	XLOC_030005		AEMK02000452.1_45921
ENSSSCG00000008057	AMDHD2	ENSSSCG00000046402	XLOC_030021		AEMK02000452.1_45925
ENSSSCG00000012113	AMELY	ENSSSCG00000046461	XLOC_030029		AEMK02000452.1_45929
ENSSSCG00000012361	AMER1	ENSSSCG00000046469	XLOC_030032		AEMK02000452.1_45935
ENSSSCG00000016391	AMER3	ENSSSCG00000046470	XLOC_030034		AEMK02000452.1_45943
ENSSSCG00000002822	AMFR	ENSSSCG00000046498	XLOC_030037		AEMK02000452.1_45946
ENSSSCG00000034883	AMIGO1	ENSSSCG00000046509	XLOC_030053		AEMK02000452.1_45952
ENSSSCG00000000810	AMIGO2	ENSSSCG00000046512	XLOC_030068		AEMK02000452.1_45953
ENSSSCG00000011389	AMIGO3	ENSSSCG00000046546	XLOC_030088		AEMK02000452.1_45956
ENSSSCG00000037591	AMMECR1	ENSSSCG00000046581	XLOC_030124		AEMK02000452.1_45957
ENSSSCG00000028633	AMMECR1L	ENSSSCG00000046584	XLOC_030133		AEMK02000452.1_45959
ENSSSCG00000002524	AMN	ENSSSCG00000046589	XLOC_030137		AEMK02000452.1_45962
ENSSSCG00000034407	AMN1	ENSSSCG00000046592	XLOC_030148		AEMK02000452.1_45963
ENSSSCG00000012591	AMOT	ENSSSCG00000046600	XLOC_030150		AEMK02000452.1_45965
ENSSSCG00000014960	AMOTL1	ENSSSCG00000046607	XLOC_030163		AEMK02000452.1_45968
ENSSSCG00000011643	AMOTL2	ENSSSCG00000046608	XLOC_030179		AEMK02000452.1_45971
ENSSSCG00000031125	AMPD2	ENSSSCG00000046612	XLOC_030185		AEMK02000452.1_45973
ENSSSCG00000022492	AMPD3	ENSSSCG00000046622	XLOC_030187		AEMK02000452.1_45975
ENSSSCG00000024136	AMPH	ENSSSCG00000046625	XLOC_030190		AEMK02000452.1_46079
ENSSSCG00000022975	AMT	ENSSSCG00000046655	XLOC_030200		AEMK02000452.1_46081
ENSSSCG00000017264	AMZ2	ENSSSCG00000046669	XLOC_030201		AEMK02000452.1_46104
ENSSSCG00000008105	ANAPC1	ENSSSCG00000046701	XLOC_030204		AEMK02000452.1_46107
ENSSSCG00000033871	ANAPC10	ENSSSCG00000046713	XLOC_030210		AEMK02000452.1_46108
ENSSSCG00000033057	ANAPC13	ENSSSCG00000046722	XLOC_030213		AEMK02000452.1_46109
ENSSSCG00000014806	ANAPC15	ENSSSCG00000046723	XLOC_030226		AEMK02000452.1_46112
ENSSSCG00000061761	ANAPC16	ENSSSCG00000046729	XLOC_030228		AEMK02000452.1_46155
ENSSSCG00000032828	ANAPC2	ENSSSCG00000046741	XLOC_030256		AEMK02000452.1_46202
ENSSSCG00000025902	ANAPC4	ENSSSCG00000046743	XLOC_030261		AEMK02000452.1_46209
ENSSSCG00000009814	ANAPC5	ENSSSCG00000046754	XLOC_030269		AEMK02000452.1_46216
ENSSSCG00000030222	ANAPC7	ENSSSCG00000046766	XLOC_030284		AEMK02000465.1_46611
ENSSSCG00000059608	ANG	ENSSSCG00000046803	XLOC_030286		AEMK02000465.1_46612
ENSSSCG00000002390	ANGEL1	ENSSSCG00000046827	XLOC_030288		AEMK02000465.1_46613
ENSSSCG00000015588	ANGEL2	ENSSSCG00000046828	XLOC_030292		AEMK02000489.1_47115
ENSSSCG00000006035	ANGPT1	ENSSSCG00000046835	XLOC_030297		AEMK02000489.1_47198
ENSSSCG00000015753	ANGPT2	ENSSSCG00000046840	XLOC_030312		AEMK02000682.1_46331
ENSSSCG00000007198	ANGPT4	ENSSSCG00000046841	XLOC_030365		AEMK02000682.1_46332
ENSSSCG00000015522	ANGPTL1	ENSSSCG00000046853	XLOC_030373		AEMK02000682.1_46333
ENSSSCG00000005608	ANGPTL2	ENSSSCG00000046858	XLOC_030379		AEMK02000682.1_46345
ENSSSCG00000003819	ANGPTL3	ENSSSCG00000046897	XLOC_030393		AEMK02000682.1_46389
ENSSSCG00000013599	ANGPTL4	ENSSSCG00000046916	XLOC_030415		AEMK02000682.1_46407
ENSSSCG00000013663	ANGPTL6	ENSSSCG00000046918	XLOC_030426		AEMK02000682.1_46412
ENSSSCG00000003414	ANGPTL7	ENSSSCG00000046945	XLOC_030429		AEMK02000682.1_46413
ENSSSCG00000036965	ANGPTL8	ENSSSCG00000046947	XLOC_030432		AEMK02000682.1_46443
ENSSSCG00000007022	ANK1	ENSSSCG00000046958	XLOC_030443		AEMK02000682.1_46446
ENSSSCG00000016042	ANKAR	ENSSSCG00000046995	XLOC_030462		AEMK02000695.1_47511
ENSSSCG00000004545	ANKDD1A	ENSSSCG00000046996	XLOC_030469		X_43955
ENSSSCG00000014083	ANKDD1B	ENSSSCG00000047016	XLOC_030487		X_44102
ENSSSCG00000017877	ANKFY1	ENSSSCG00000047048	XLOC_030526		X_44141
ENSSSCG00000016784	ANKH	ENSSSCG00000047073	XLOC_030551		X_44270
ENSSSCG00000014364	ANKHD1	ENSSSCG00000047084	XLOC_030556		X_44279
ENSSSCG00000015314	ANKIB1	ENSSSCG00000047086	XLOC_030558		X_44298
ENSSSCG00000037099	ANKLE1	ENSSSCG00000047090	XLOC_030559		X_44299
ENSSSCG00000026781	ANKLE2	ENSSSCG00000047129	XLOC_030589		X_44300
ENSSSCG00000015360	ANKMY2	ENSSSCG00000047133	XLOC_030591		X_44373
ENSSSCG00000014070	ANKRA2	ENSSSCG00000047147	XLOC_030618		X_44459
ENSSSCG00000010461	ANKRD1	ENSSSCG00000047157	XLOC_030620		X_44530
ENSSSCG00000033732	ANKRD10	ENSSSCG00000047160	XLOC_030622		X_44574
ENSSSCG00000039541	ANKRD11	ENSSSCG00000047163	XLOC_030623		X_44681
ENSSSCG00000003682	ANKRD12	ENSSSCG00000047171	XLOC_030642		X_44816
ENSSSCG00000009924	ANKRD13A	ENSSSCG00000047186	XLOC_030655		X_44893
ENSSSCG00000017793	ANKRD13B	ENSSSCG00000047187	XLOC_030656		X_44940
ENSSSCG00000003790	ANKRD13C	ENSSSCG00000047195	XLOC_030661		X_44993
ENSSSCG00000012917	ANKRD13D	ENSSSCG00000047212	XLOC_030668		X_44994
ENSSSCG00000028790	ANKRD16	ENSSSCG00000047220	XLOC_030672		X_45110
ENSSSCG00000024592	ANKRD17	ENSSSCG00000047236	XLOC_030675		X_45240
ENSSSCG00000010445	ANKRD22	ENSSSCG00000047253	XLOC_030683		X_45390
ENSSSCG00000008200	ANKRD23	ENSSSCG00000047254	XLOC_030685		X_45411
ENSSSCG00000013497	ANKRD24	ENSSSCG00000047280	XLOC_030687		X_45412
ENSSSCG00000002859	ANKRD27	ENSSSCG00000047290	XLOC_030688		X_45413
ENSSSCG00000011194	ANKRD28	ENSSSCG00000047310	XLOC_030689		X_45416
ENSSSCG00000003708	ANKRD29	ENSSSCG00000047350	XLOC_030690		X_45420
ENSSSCG00000039609	ANKRD33B	ENSSSCG00000047357	XLOC_030696		X_45422
ENSSSCG00000014124	ANKRD34B	ENSSSCG00000047361	XLOC_030698		X_45424
ENSSSCG00000006688	ANKRD35	ENSSSCG00000047367	XLOC_030699		X_45428
ENSSSCG00000015798	ANKRD37	ENSSSCG00000047374	XLOC_030705		X_45430
ENSSSCG00000058741	ANKRD39	ENSSSCG00000047376	XLOC_030730		Y_45571
ENSSSCG00000038760	ANKRD40	ENSSSCG00000047379	XLOC_030740		Y_45573
ENSSSCG00000017556	ANKRD40CL	ENSSSCG00000047398	XLOC_030743		AEMK02000465.1_42055
ENSSSCG00000014902	ANKRD42	ENSSSCG00000047401	XLOC_030747		AEMK02000489.1_42503
ENSSSCG00000016074	ANKRD44	ENSSSCG00000047427	XLOC_030748		AEMK02000489.1_42586
ENSSSCG00000015491	ANKRD45	ENSSSCG00000047436	XLOC_030753		AEMK02000682.1_4179
ENSSSCG00000006065	ANKRD46	ENSSSCG00000047438	XLOC_030788		AEMK02000682.1_41793
ENSSSCG00000014956	ANKRD49	ENSSSCG00000047440	XLOC_030808		AEMK02000682.1_41796
ENSSSCG00000022173	ANKRD50	ENSSSCG00000047452	XLOC_030831		AEMK02000682.1_41805
ENSSSCG00000000386	ANKRD52	ENSSSCG00000047455	XLOC_030844		AEMK02000682.1_41847
ENSSSCG00000000120	ANKRD54	ENSSSCG00000047466	XLOC_030857		AEMK02000682.1_41867
ENSSSCG00000016917	ANKRD55	ENSSSCG00000047472	XLOC_030861		AEMK02000682.1_41872
ENSSSCG00000004322	ANKRD6	ENSSSCG00000047474	XLOC_030870		AEMK02000682.1_41873
ENSSSCG00000007593	ANKRD61	ENSSSCG00000047506	XLOC_030871		AEMK02000682.1_41897
ENSSSCG00000053436	ANKRD63	ENSSSCG00000047521	XLOC_030872		AEMK02000682.1_41900
ENSSSCG00000032691	ANKRD66	ENSSSCG00000047540	XLOC_030892		AEMK02000695.1_42899
ENSSSCG00000001534	ANKS1A	ENSSSCG00000047545	XLOC_030900		X_39586
ENSSSCG00000022083	ANKS1B	ENSSSCG00000047578	XLOC_030906		X_39593
ENSSSCG00000007939	ANKS3	ENSSSCG00000047593	XLOC_030915		X_39738
ENSSSCG00000007850	ANKS4B	ENSSSCG00000047628	XLOC_030916		X_39775
ENSSSCG00000005378	ANKS6	ENSSSCG00000047638	XLOC_030917		X_39851
ENSSSCG00000016212	ANKZF1	ENSSSCG00000047648	XLOC_030918		X_39896
ENSSSCG00000016658	ANLN	ENSSSCG00000047668	XLOC_030940		X_39905
ENSSSCG00000024158	ANO1	ENSSSCG00000047676	XLOC_031003		X_3992
ENSSSCG00000011296	ANO10	ENSSSCG00000047690	XLOC_031006		X_39920
ENSSSCG00000013339	ANO3	ENSSSCG00000047705	XLOC_031011		X_39924
ENSSSCG00000000873	ANO4	ENSSSCG00000047706	XLOC_031016		X_39985
ENSSSCG00000013344	ANO5	ENSSSCG00000047720	XLOC_031030		X_40061
ENSSSCG00000000804	ANO6	ENSSSCG00000047735	XLOC_031031		X_40122
ENSSSCG00000039330	ANO8	ENSSSCG00000047739	XLOC_031038		X_40251
ENSSSCG00000024569	ANO9	ENSSSCG00000047748	XLOC_031058		X_40271
ENSSSCG00000062892	ANP32B	ENSSSCG00000047753	XLOC_031085		X_40334
ENSSSCG00000035209	ANP32E	ENSSSCG00000047756	XLOC_031087		X_40370
ENSSSCG00000001849	ANPEP	ENSSSCG00000047761	XLOC_031100		X_40441
ENSSSCG00000008004	ANTKMT	ENSSSCG00000047770	XLOC_031112		X_40482
ENSSSCG00000008340	ANTXR1	ENSSSCG00000047778	XLOC_031114		X_40483
ENSSSCG00000009256	ANTXR2	ENSSSCG00000047790	XLOC_031115		X_40486
ENSSSCG00000005267	ANXA1	ENSSSCG00000047793	XLOC_031127		X_4052
ENSSSCG00000030058	ANXA10	ENSSSCG00000047798	XLOC_031136		X_40648
ENSSSCG00000010331	ANXA11	ENSSSCG00000047818	XLOC_031143		X_40718
ENSSSCG00000005979	ANXA13	ENSSSCG00000047820	XLOC_031147		X_40720
ENSSSCG00000004578	ANXA2	ENSSSCG00000047853	XLOC_031148		X_40722
ENSSSCG00000008336	ANXA4	ENSSSCG00000047862	XLOC_031151		X_40766
ENSSSCG00000009097	ANXA5	ENSSSCG00000047867	XLOC_031209		X_40824
ENSSSCG00000017089	ANXA6	ENSSSCG00000047869	XLOC_031213		X_40848
ENSSSCG00000010299	ANXA7	ENSSSCG00000047882	XLOC_031220		X_40908
ENSSSCG00000006643	ANXA9	ENSSSCG00000047910	XLOC_031221		X_4092
ENSSSCG00000016657	AOAH	ENSSSCG00000047924	XLOC_031236		X_40929
ENSSSCG00000016442	AOC1	ENSSSCG00000047946	XLOC_031238		X_40936
ENSSSCG00000017384	AOC2	ENSSSCG00000047947	XLOC_031250		X_40938
ENSSSCG00000029606	AOX1	ENSSSCG00000047965	XLOC_031257		X_40940
ENSSSCG00000009128	AP1AR	ENSSSCG00000047981	XLOC_031258		X_40944
ENSSSCG00000009978	AP1B1	ENSSSCG00000047982	XLOC_031265		X_40946
ENSSSCG00000002740	AP1G1	ENSSSCG00000048017	XLOC_031276		Y_41008
ENSSSCG00000002015	AP1G2	ENSSSCG00000048041	XLOC_031281		Y_41071
ENSSSCG00000013856	AP1M1	ENSSSCG00000048074	XLOC_031292
ENSSSCG00000025838	AP1M2	ENSSSCG00000048082	XLOC_031295
ENSSSCG00000021145	AP1S1	ENSSSCG00000048095	XLOC_031325
ENSSSCG00000036074	AP1S2	ENSSSCG00000048106	XLOC_031342
ENSSSCG00000040847	AP1S3	ENSSSCG00000048122	XLOC_031352
ENSSSCG00000003199	AP2A1	ENSSSCG00000048139	XLOC_031354
ENSSSCG00000012836	AP2A2	ENSSSCG00000048143	XLOC_031357
ENSSSCG00000017712	AP2B1	ENSSSCG00000048146	XLOC_031365
ENSSSCG00000024437	AP2M1	ENSSSCG00000048152	XLOC_031395
ENSSSCG00000003106	AP2S1	ENSSSCG00000048160	XLOC_031423
ENSSSCG00000014101	AP3B1	ENSSSCG00000048179	XLOC_031434
ENSSSCG00000001807	AP3B2	ENSSSCG00000048190	XLOC_031440
ENSSSCG00000040157	AP3D1	ENSSSCG00000048192	XLOC_031458
ENSSSCG00000010314	AP3M1	ENSSSCG00000048202	XLOC_031463
ENSSSCG00000007033	AP3M2	ENSSSCG00000048203	XLOC_031478
ENSSSCG00000037595	AP3S1	ENSSSCG00000048207	XLOC_031510
ENSSSCG00000030174	AP3S2	ENSSSCG00000048215	XLOC_031514
ENSSSCG00000006762	AP4B1	ENSSSCG00000048218	XLOC_031534
ENSSSCG00000004634	AP4E1	ENSSSCG00000048222	XLOC_031536
ENSSSCG00000034288	AP4M1	ENSSSCG00000048223	XLOC_031554
ENSSSCG00000001972	AP4S1	ENSSSCG00000048250	XLOC_031572
ENSSSCG00000012978	AP5B1	ENSSSCG00000048254	XLOC_031583
ENSSSCG00000005065	AP5M1	ENSSSCG00000048264	XLOC_031586
ENSSSCG00000033297	AP5S1	ENSSSCG00000048316	XLOC_031619
ENSSSCG00000007577	AP5Z1	ENSSSCG00000048366	XLOC_031632
ENSSSCG00000000884	APAF1	ENSSSCG00000048375	XLOC_031642
ENSSSCG00000005250	APBA1	ENSSSCG00000048379	XLOC_031647
ENSSSCG00000004849	APBA2	ENSSSCG00000048405	XLOC_031663
ENSSSCG00000013492	APBA3	ENSSSCG00000048420	XLOC_031684
ENSSSCG00000014628	APBB1	ENSSSCG00000048434	XLOC_031696
ENSSSCG00000030156	APBB1IP	ENSSSCG00000048463	XLOC_031700
ENSSSCG00000022168	APBB2	ENSSSCG00000048488	XLOC_031708
ENSSSCG00000014366	APBB3	ENSSSCG00000048500	XLOC_031717
ENSSSCG00000014207	APC	ENSSSCG00000048515	XLOC_031723
ENSSSCG00000023329	APC2	ENSSSCG00000048516	XLOC_031728
ENSSSCG00000039797	APCDD1	ENSSSCG00000048519	XLOC_031750
ENSSSCG00000011385	APEH	ENSSSCG00000048523	XLOC_031751
ENSSSCG00000040060	APEX1	ENSSSCG00000048549	XLOC_031756
ENSSSCG00000012348	APEX2	ENSSSCG00000048551	XLOC_031810
ENSSSCG00000028297	APH1A	ENSSSCG00000048556	XLOC_031839
ENSSSCG00000032949	APH1B	ENSSSCG00000048558	XLOC_031862
ENSSSCG00000013285	API5	ENSSSCG00000048572	XLOC_031875
ENSSSCG00000013299	APIP	ENSSSCG00000048579	XLOC_031883
ENSSSCG00000008346	APLF	ENSSSCG00000048583	XLOC_031903
ENSSSCG00000048443	APLN	ENSSSCG00000048623	XLOC_031907
ENSSSCG00000038869	APLNR	ENSSSCG00000048633	XLOC_031944
ENSSSCG00000002916	APLP1	ENSSSCG00000048636	XLOC_031946
ENSSSCG00000015244	APLP2	ENSSSCG00000048684	XLOC_031969
ENSSSCG00000036286	APMAP	ENSSSCG00000048686	XLOC_031981
ENSSSCG00000030921	APOA1	ENSSSCG00000048693	XLOC_031982
ENSSSCG00000006355	APOA2	ENSSSCG00000048697	XLOC_031985
ENSSSCG00000040689	APOA4	ENSSSCG00000048702	XLOC_031986
ENSSSCG00000008595	APOB	ENSSSCG00000048711	XLOC_031998
ENSSSCG00000000668	APOBEC1	ENSSSCG00000048761	XLOC_032007
ENSSSCG00000042447	APOBEC2	ENSSSCG00000048769	XLOC_032010
ENSSSCG00000015069	APOC3	ENSSSCG00000048773	XLOC_032020
ENSSSCG00000011831	APOD	ENSSSCG00000048776	XLOC_032051
ENSSSCG00000003088	APOE	ENSSSCG00000048782	XLOC_032058
ENSSSCG00000000398	APOF	ENSSSCG00000048787	XLOC_032067
ENSSSCG00000040910	APOH	ENSSSCG00000048792	XLOC_032068
ENSSSCG00000036787	APOLD1	ENSSSCG00000048795	XLOC_032072
ENSSSCG00000001411	APOM	ENSSSCG00000048809	XLOC_038744
ENSSSCG00000012174	APOO	ENSSSCG00000048833	XLOC_038763
ENSSSCG00000012459	APOOL	ENSSSCG00000048855	XLOC_038767
ENSSSCG00000012022	APP	ENSSSCG00000048856	XLOC_038773
ENSSSCG00000017678	APPBP2	ENSSSCG00000048860	XLOC_038781
ENSSSCG00000032357	APPL1	ENSSSCG00000048861	XLOC_038782
ENSSSCG00000000841	APPL2	ENSSSCG00000048877	XLOC_038810
ENSSSCG00000002650	APRT	ENSSSCG00000048879	XLOC_038815
ENSSSCG00000011001	APTX	ENSSSCG00000048882	XLOC_038839
ENSSSCG00000033190	AQP1	ENSSSCG00000048883	XLOC_038845
ENSSSCG00000006551	AQP10	ENSSSCG00000048896	XLOC_038848
ENSSSCG00000014880	AQP11	ENSSSCG00000048929	XLOC_038849
ENSSSCG00000040513	AQP3	ENSSSCG00000048933	XLOC_038867
ENSSSCG00000000211	AQP5	ENSSSCG00000048979	XLOC_038880
ENSSSCG00000031865	AQP8	ENSSSCG00000049043	XLOC_038881
ENSSSCG00000004597	AQP9	ENSSSCG00000049044	XLOC_038900
ENSSSCG00000004802	AQR	ENSSSCG00000049063	XLOC_038902
ENSSSCG00000012275	ARAF	ENSSSCG00000049076	XLOC_038904
ENSSSCG00000014817	ARAP1	ENSSSCG00000049090	XLOC_038905
ENSSSCG00000008768	ARAP2	ENSSSCG00000049098	XLOC_038912
ENSSSCG00000014391	ARAP3	ENSSSCG00000049100	XLOC_038929
ENSSSCG00000030053	ARCN1	ENSSSCG00000049105	XLOC_038945
ENSSSCG00000008963	AREG	ENSSSCG00000049107	XLOC_038957
ENSSSCG00000002370	AREL1	ENSSSCG00000049122	XLOC_038960
ENSSSCG00000051954	ARF3	ENSSSCG00000049125	XLOC_038987
ENSSSCG00000031791	ARF4	ENSSSCG00000049149	XLOC_038997
ENSSSCG00000016593	ARF5	ENSSSCG00000049152	XLOC_039011
ENSSSCG00000005012	ARF6	ENSSSCG00000049161	XLOC_039020
ENSSSCG00000032235	ARFGAP1	ENSSSCG00000049182	XLOC_039027
ENSSSCG00000013245	ARFGAP2	ENSSSCG00000049192	XLOC_039042
ENSSSCG00000000037	ARFGAP3	ENSSSCG00000049194	XLOC_039046
ENSSSCG00000006201	ARFGEF1	ENSSSCG00000049195	XLOC_039061
ENSSSCG00000007460	ARFGEF2	ENSSSCG00000049196	XLOC_039066
ENSSSCG00000022968	ARFGEF3	ENSSSCG00000049199	XLOC_039072
ENSSSCG00000009010	ARFIP1	ENSSSCG00000049223	XLOC_039099
ENSSSCG00000014625	ARFIP2	ENSSSCG00000049234	XLOC_039110
ENSSSCG00000035304	ARFRP1	ENSSSCG00000049244	XLOC_039114
ENSSSCG00000004195	ARG1	ENSSSCG00000049245	XLOC_039119
ENSSSCG00000002294	ARG2	ENSSSCG00000049283	XLOC_039124
ENSSSCG00000009536	ARGLU1	ENSSSCG00000049293	XLOC_039151
ENSSSCG00000013256	ARHGAP1	ENSSSCG00000049296	XLOC_039153
ENSSSCG00000009029	ARHGAP10	ENSSSCG00000049319	XLOC_039178
ENSSSCG00000011026	ARHGAP12	ENSSSCG00000049325	XLOC_039182
ENSSSCG00000015671	ARHGAP15	ENSSSCG00000049339	XLOC_039191
ENSSSCG00000031488	ARHGAP17	ENSSSCG00000049350	XLOC_039202
ENSSSCG00000004205	ARHGAP18	ENSSSCG00000049389	XLOC_039223
ENSSSCG00000037185	ARHGAP19	ENSSSCG00000049404	XLOC_039229
ENSSSCG00000015015	ARHGAP20	ENSSSCG00000049405	XLOC_039233
ENSSSCG00000011074	ARHGAP21	ENSSSCG00000049421	XLOC_039234
ENSSSCG00000010381	ARHGAP22	ENSSSCG00000049423	XLOC_039257
ENSSSCG00000018058	ARHGAP23	ENSSSCG00000049454	XLOC_039258
ENSSSCG00000009229	ARHGAP24	ENSSSCG00000049464	XLOC_039305
ENSSSCG00000008344	ARHGAP25	ENSSSCG00000049468	XLOC_039329
ENSSSCG00000014399	ARHGAP26	ENSSSCG00000049480	XLOC_039331
ENSSSCG00000017328	ARHGAP27	ENSSSCG00000049491	XLOC_039332
ENSSSCG00000021612	ARHGAP28	ENSSSCG00000049494	XLOC_039339
ENSSSCG00000006889	ARHGAP29	ENSSSCG00000049497	XLOC_039342
ENSSSCG00000006372	ARHGAP30	ENSSSCG00000049507	XLOC_039357
ENSSSCG00000026224	ARHGAP31	ENSSSCG00000049517	XLOC_039378
ENSSSCG00000015238	ARHGAP32	ENSSSCG00000049519	XLOC_039382
ENSSSCG00000039135	ARHGAP33	ENSSSCG00000049539	XLOC_039387
ENSSSCG00000003107	ARHGAP35	ENSSSCG00000049557	XLOC_039404
ENSSSCG00000005894	ARHGAP39	ENSSSCG00000049587	XLOC_039487
ENSSSCG00000012790	ARHGAP4	ENSSSCG00000049603	XLOC_039492
ENSSSCG00000014976	ARHGAP42	ENSSSCG00000049610	XLOC_039494
ENSSSCG00000018019	ARHGAP44	ENSSSCG00000049635	XLOC_039507
ENSSSCG00000027565	ARHGAP45	ENSSSCG00000049638	XLOC_039533
ENSSSCG00000001966	ARHGAP5	ENSSSCG00000049656	XLOC_039534
ENSSSCG00000000021	ARHGAP8	ENSSSCG00000049680	XLOC_039563
ENSSSCG00000000437	ARHGAP9	ENSSSCG00000049683	XLOC_039564
ENSSSCG00000034058	ARHGDIA	ENSSSCG00000049685	XLOC_039646
ENSSSCG00000033337	ARHGDIB	ENSSSCG00000049694	XLOC_039679
ENSSSCG00000038979	ARHGDIG	ENSSSCG00000049696	XLOC_039705
ENSSSCG00000003040	ARHGEF1	ENSSSCG00000049720	XLOC_039707
ENSSSCG00000023419	ARHGEF10	ENSSSCG00000049728	XLOC_039708
ENSSSCG00000003486	ARHGEF10L	ENSSSCG00000049740	XLOC_039712
ENSSSCG00000006461	ARHGEF11	ENSSSCG00000049801	XLOC_039716
ENSSSCG00000015129	ARHGEF12	ENSSSCG00000049811	XLOC_039723
ENSSSCG00000028048	ARHGEF15	ENSSSCG00000049849	XLOC_039731
ENSSSCG00000024223	ARHGEF16	ENSSSCG00000049863	XLOC_039740
ENSSSCG00000013568	ARHGEF18	ENSSSCG00000049865	XLOC_039748
ENSSSCG00000003472	ARHGEF19	ENSSSCG00000049906	XLOC_039754
ENSSSCG00000006502	ARHGEF2	ENSSSCG00000049957	XLOC_039761
ENSSSCG00000000435	ARHGEF25	ENSSSCG00000049958	XLOC_039763
ENSSSCG00000024205	ARHGEF26	ENSSSCG00000049959	XLOC_039767
ENSSSCG00000028317	ARHGEF28	ENSSSCG00000049968	XLOC_039769
ENSSSCG00000030359	ARHGEF3	ENSSSCG00000049971	XLOC_039779
ENSSSCG00000040621	ARHGEF33	ENSSSCG00000049992	XLOC_039783
ENSSSCG00000014436	ARHGEF37	ENSSSCG00000050000	XLOC_039788
ENSSSCG00000021764	ARHGEF38	ENSSSCG00000050031	XLOC_039813
ENSSSCG00000005314	ARHGEF39	ENSSSCG00000050063	XLOC_039814
ENSSSCG00000023857	ARHGEF40	ENSSSCG00000050067	XLOC_039826
ENSSSCG00000022525	ARHGEF5	ENSSSCG00000050072	XLOC_039874
ENSSSCG00000030460	ARHGEF6	ENSSSCG00000050077	XLOC_039878
ENSSSCG00000009551	ARHGEF7	ENSSSCG00000050081	XLOC_039890
ENSSSCG00000003559	ARID1A	ENSSSCG00000050085	XLOC_039919
ENSSSCG00000004064	ARID1B	ENSSSCG00000050095	XLOC_039933
ENSSSCG00000030685	ARID2	ENSSSCG00000050100	XLOC_039941
ENSSSCG00000037642	ARID3A	ENSSSCG00000050103	XLOC_039959
ENSSSCG00000001905	ARID3B	ENSSSCG00000050111	XLOC_039965
ENSSSCG00000010971	ARID3C	ENSSSCG00000050119	XLOC_039968
ENSSSCG00000005073	ARID4A	ENSSSCG00000050134	XLOC_039981
ENSSSCG00000060488	ARID4B	ENSSSCG00000050135	XLOC_039992
ENSSSCG00000008123	ARID5A	ENSSSCG00000050149	XLOC_039995
ENSSSCG00000010219	ARID5B	ENSSSCG00000050163	XLOC_040013
ENSSSCG00000054126	ARIH1	ENSSSCG00000050167	XLOC_040016
ENSSSCG00000011367	ARIH2	ENSSSCG00000050176	XLOC_040018
ENSSSCG00000000870	ARL1	ENSSSCG00000050184	XLOC_040033
ENSSSCG00000029985	ARL10	ENSSSCG00000050204	XLOC_040040
ENSSSCG00000053768	ARL11	ENSSSCG00000050213	XLOC_040043
ENSSSCG00000027571	ARL13B	ENSSSCG00000050221	XLOC_040049
ENSSSCG00000056934	ARL14	ENSSSCG00000050230	XLOC_040053
ENSSSCG00000039889	ARL14EP	ENSSSCG00000050246	XLOC_040054
ENSSSCG00000016894	ARL15	ENSSSCG00000050256	XLOC_040056
ENSSSCG00000053661	ARL16	ENSSSCG00000050259	XLOC_040075
ENSSSCG00000034387	ARL2	ENSSSCG00000050270	XLOC_040078
ENSSSCG00000002819	ARL2BP	ENSSSCG00000050295	XLOC_040105
ENSSSCG00000031782	ARL3	ENSSSCG00000050296	XLOC_040108
ENSSSCG00000032709	ARL4A	ENSSSCG00000050311	XLOC_040147
ENSSSCG00000034293	ARL4C	ENSSSCG00000050325	XLOC_040149
ENSSSCG00000017380	ARL4D	ENSSSCG00000050339	XLOC_040163
ENSSSCG00000031541	ARL5A	ENSSSCG00000050340	XLOC_040169
ENSSSCG00000031456	ARL5B	ENSSSCG00000050344	XLOC_040170
ENSSSCG00000027278	ARL6	ENSSSCG00000050347	XLOC_040181
ENSSSCG00000009782	ARL6IP4	ENSSSCG00000050358	XLOC_040190
ENSSSCG00000033154	ARL6IP5	ENSSSCG00000050364	XLOC_040196
ENSSSCG00000015868	ARL6IP6	ENSSSCG00000050382	XLOC_040243
ENSSSCG00000036967	ARL8A	ENSSSCG00000050385	XLOC_040252
ENSSSCG00000011535	ARL8B	ENSSSCG00000050388	XLOC_040280
ENSSSCG00000006220	ARMC1	ENSSSCG00000050394	XLOC_040294
ENSSSCG00000028444	ARMC10	ENSSSCG00000050397	XLOC_040322
ENSSSCG00000001550	ARMC12	ENSSSCG00000050407	XLOC_040345
ENSSSCG00000004388	ARMC2	ENSSSCG00000050419	XLOC_040372
ENSSSCG00000025245	ARMC5	ENSSSCG00000050425	XLOC_040374
ENSSSCG00000049430	ARMC6	ENSSSCG00000050426	XLOC_040511
ENSSSCG00000036610	ARMC8	ENSSSCG00000050451	XLOC_040512
ENSSSCG00000023994	ARMC9	ENSSSCG00000050456	XLOC_040514
ENSSSCG00000038569	ARMCX1	ENSSSCG00000050474	XLOC_040515
ENSSSCG00000012510	ARMCX2	ENSSSCG00000050499	XLOC_040527
ENSSSCG00000040281	ARMCX3	ENSSSCG00000050517	XLOC_040535
ENSSSCG00000034821	ARMCX4	ENSSSCG00000050525	XLOC_040576
ENSSSCG00000012518	ARMCX5	ENSSSCG00000050531	XLOC_040601
ENSSSCG00000012508	ARMCX6	ENSSSCG00000050540	XLOC_040602
ENSSSCG00000033259	ARMH1	ENSSSCG00000050566	XLOC_040615
ENSSSCG00000010571	ARMH3	ENSSSCG00000050568	XLOC_040632
ENSSSCG00000005071	ARMH4	ENSSSCG00000050582	XLOC_040655
ENSSSCG00000004088	ARMT1	ENSSSCG00000050584	XLOC_040656
ENSSSCG00000006646	ARNT	ENSSSCG00000050595	XLOC_040657
ENSSSCG00000040288	ARNT2	ENSSSCG00000050604	XLOC_040658
ENSSSCG00000007609	ARPC1A	ENSSSCG00000050609	XLOC_040670
ENSSSCG00000007625	ARPC1B	ENSSSCG00000050626	XLOC_040683
ENSSSCG00000016185	ARPC2	ENSSSCG00000050648	XLOC_040685
ENSSSCG00000009821	ARPC3	ENSSSCG00000050651	XLOC_040688
ENSSSCG00000015560	ARPC5	ENSSSCG00000050667	XLOC_040695
ENSSSCG00000001850	ARPIN	ENSSSCG00000050679	XLOC_047390
ENSSSCG00000053937	ARPP19	ENSSSCG00000050687	XLOC_047395
ENSSSCG00000011238	ARPP21	ENSSSCG00000050702	XLOC_047396
ENSSSCG00000014852	ARRB1	ENSSSCG00000050719	XLOC_047422
ENSSSCG00000017918	ARRB2	ENSSSCG00000050739	XLOC_047425
ENSSSCG00000039824	ARRDC1	ENSSSCG00000050748	XLOC_047438
ENSSSCG00000013893	ARRDC2	ENSSSCG00000050750	XLOC_047459
ENSSSCG00000014156	ARRDC3	ENSSSCG00000050752	XLOC_047461
ENSSSCG00000002252	ARRDC4	ENSSSCG00000050757	XLOC_047465
ENSSSCG00000032428	ARSA	ENSSSCG00000050781	XLOC_047473
ENSSSCG00000038535	ARSB	ENSSSCG00000050783	XLOC_047474
ENSSSCG00000058492	ARSD	ENSSSCG00000050796	XLOC_047483
ENSSSCG00000017261	ARSG	ENSSSCG00000050849	XLOC_047489
ENSSSCG00000014448	ARSI	ENSSSCG00000050853	XLOC_047492
ENSSSCG00000009122	ARSJ	ENSSSCG00000050854	XLOC_047524
ENSSSCG00000014139	ARSK	ENSSSCG00000050858	XLOC_047527
ENSSSCG00000022129	ARSL	ENSSSCG00000050865	XLOC_047531
ENSSSCG00000008976	ART3	ENSSSCG00000050888	XLOC_047532
ENSSSCG00000000607	ART4	ENSSSCG00000050903	XLOC_047541
ENSSSCG00000034778	ARTN	ENSSSCG00000050904	XLOC_047548
ENSSSCG00000010179	ARV1	ENSSSCG00000050930	XLOC_047551
ENSSSCG00000010133	ARVCF	ENSSSCG00000050934	XLOC_047554
ENSSSCG00000010592	AS3MT	ENSSSCG00000050944	XLOC_047589
ENSSSCG00000006995	ASAH1	ENSSSCG00000050951	XLOC_047590
ENSSSCG00000028759	ASAP1	ENSSSCG00000050964	XLOC_047605
ENSSSCG00000008642	ASAP2	ENSSSCG00000050968	XLOC_047622
ENSSSCG00000028108	ASAP3	ENSSSCG00000050974	XLOC_047642
ENSSSCG00000016340	ASB1	ENSSSCG00000050987	XLOC_047652
ENSSSCG00000012133	ASB11	ENSSSCG00000050989	XLOC_047657
ENSSSCG00000011145	ASB13	ENSSSCG00000050997	XLOC_047659
ENSSSCG00000035320	ASB14	ENSSSCG00000051003	XLOC_047662
ENSSSCG00000016606	ASB15	ENSSSCG00000051007	XLOC_047672
ENSSSCG00000002467	ASB2	ENSSSCG00000051023	XLOC_047707
ENSSSCG00000008415	ASB3	ENSSSCG00000051026	XLOC_047740
ENSSSCG00000015333	ASB4	ENSSSCG00000051028	XLOC_047752
ENSSSCG00000030395	ASB5	ENSSSCG00000051039	XLOC_047776
ENSSSCG00000005679	ASB6	ENSSSCG00000051057	XLOC_047782
ENSSSCG00000004821	ASB7	ENSSSCG00000051064	XLOC_047792
ENSSSCG00000012132	ASB9	ENSSSCG00000051073	XLOC_047798
ENSSSCG00000023130	ASCC1	ENSSSCG00000051079	XLOC_047803
ENSSSCG00000025186	ASCC2	ENSSSCG00000051090	XLOC_047814
ENSSSCG00000004358	ASCC3	ENSSSCG00000051095	XLOC_047832
ENSSSCG00000060761	ASCL1	ENSSSCG00000051113	XLOC_047840
ENSSSCG00000033507	ASCL2	ENSSSCG00000051118	XLOC_047854
ENSSSCG00000004247	ASF1A	ENSSSCG00000051130	XLOC_047861
ENSSSCG00000013772	ASF1B	ENSSSCG00000051146	XLOC_047867
ENSSSCG00000017932	ASGR2	ENSSSCG00000051151	XLOC_047875
ENSSSCG00000006508	ASH1L	ENSSSCG00000051152	XLOC_047908
ENSSSCG00000021898	ASH2L	ENSSSCG00000051161	XLOC_047917
ENSSSCG00000000216	ASIC1	ENSSSCG00000051193	XLOC_047920
ENSSSCG00000027024	ASIC3	ENSSSCG00000051194	XLOC_047930
ENSSSCG00000008869	ASIC5	ENSSSCG00000051210	XLOC_047932
ENSSSCG00000053652	ASIP	ENSSSCG00000051218	XLOC_047948
ENSSSCG00000007738	ASL	ENSSSCG00000051219	XLOC_047969
ENSSSCG00000037174	ASMTL	ENSSSCG00000051220	XLOC_048005
ENSSSCG00000015340	ASNS	ENSSSCG00000051231	XLOC_048014
ENSSSCG00000016041	ASNSD1	ENSSSCG00000051232	XLOC_048017
ENSSSCG00000017861	ASPA	ENSSSCG00000051233	XLOC_048027
ENSSSCG00000054855	ASPDH	ENSSSCG00000051238	XLOC_048028
ENSSSCG00000039553	ASPG	ENSSSCG00000051245	XLOC_048087
ENSSSCG00000025087	ASPH	ENSSSCG00000051266	XLOC_048091
ENSSSCG00000009959	ASPHD2	ENSSSCG00000051274	XLOC_048095
ENSSSCG00000010896	ASPM	ENSSSCG00000051289	XLOC_048097
ENSSSCG00000008072	ASPN	ENSSSCG00000051290	XLOC_048109
ENSSSCG00000033099	ASPRV1	ENSSSCG00000051293	XLOC_048181
ENSSSCG00000040727	ASPSCR1	ENSSSCG00000051300	XLOC_048184
ENSSSCG00000013065	ASRGL1	ENSSSCG00000051313	XLOC_048217
ENSSSCG00000005701	ASS1	ENSSSCG00000051317	XLOC_048237
ENSSSCG00000011182	ASTE1	ENSSSCG00000051325	XLOC_048245
ENSSSCG00000015513	ASTN1	ENSSSCG00000051336	XLOC_048247
ENSSSCG00000005502	ASTN2	ENSSSCG00000051354	XLOC_048264
ENSSSCG00000007248	ASXL1	ENSSSCG00000051361	XLOC_048281
ENSSSCG00000008575	ASXL2	ENSSSCG00000051365	XLOC_048305
ENSSSCG00000003736	ASXL3	ENSSSCG00000051369	XLOC_048324
ENSSSCG00000062685	ATAD1	ENSSSCG00000051370	XLOC_048327
ENSSSCG00000005983	ATAD2	ENSSSCG00000051372	XLOC_048356
ENSSSCG00000008591	ATAD2B	ENSSSCG00000051386	XLOC_048401
ENSSSCG00000003343	ATAD3A	ENSSSCG00000051403	XLOC_048430
ENSSSCG00000035954	ATAD5	ENSSSCG00000051405	XLOC_048441
ENSSSCG00000024604	ATAT1	ENSSSCG00000051406	XLOC_048442
ENSSSCG00000026754	ATCAY	ENSSSCG00000051418	XLOC_048458
ENSSSCG00000010699	ATE1	ENSSSCG00000051442	XLOC_048478
ENSSSCG00000016138	ATF1	ENSSSCG00000051450	XLOC_048493
ENSSSCG00000038076	ATF2	ENSSSCG00000051454	XLOC_048522
ENSSSCG00000015595	ATF3	ENSSSCG00000051459	XLOC_048551
ENSSSCG00000059058	ATF4	ENSSSCG00000051466	XLOC_048578
ENSSSCG00000003201	ATF5	ENSSSCG00000051473	XLOC_048596
ENSSSCG00000006346	ATF6	ENSSSCG00000051482	XLOC_048606
ENSSSCG00000001430	ATF6B	ENSSSCG00000051499	XLOC_048611
ENSSSCG00000000278	ATF7	ENSSSCG00000051503	XLOC_048627
ENSSSCG00000000612	ATF7IP	ENSSSCG00000051505	XLOC_048629
ENSSSCG00000020675	ATF7IP2	ENSSSCG00000051508	XLOC_048640
ENSSSCG00000025210	ATG10	ENSSSCG00000051509	XLOC_048659
ENSSSCG00000033687	ATG101	ENSSSCG00000051511	XLOC_048663
ENSSSCG00000033912	ATG12	ENSSSCG00000051518	XLOC_048670
ENSSSCG00000013257	ATG13	ENSSSCG00000051522	XLOC_048693
ENSSSCG00000005058	ATG14	ENSSSCG00000051526	XLOC_048704
ENSSSCG00000016300	ATG16L1	ENSSSCG00000051530	XLOC_048712
ENSSSCG00000014819	ATG16L2	ENSSSCG00000051549	XLOC_048732
ENSSSCG00000023890	ATG2A	ENSSSCG00000051557	XLOC_048742
ENSSSCG00000002502	ATG2B	ENSSSCG00000051564	XLOC_048768
ENSSSCG00000011930	ATG3	ENSSSCG00000051565	XLOC_048772
ENSSSCG00000012569	ATG4A	ENSSSCG00000051566	XLOC_048779
ENSSSCG00000032919	ATG4B	ENSSSCG00000051575	XLOC_048783
ENSSSCG00000003816	ATG4C	ENSSSCG00000051586	XLOC_048805
ENSSSCG00000013645	ATG4D	ENSSSCG00000051590	XLOC_048807
ENSSSCG00000004370	ATG5	ENSSSCG00000051601	XLOC_048822
ENSSSCG00000011575	ATG7	ENSSSCG00000051611	XLOC_048832
ENSSSCG00000016211	ATG9A	ENSSSCG00000051629	XLOC_048837
ENSSSCG00000016173	ATIC	ENSSSCG00000051633	XLOC_048858
ENSSSCG00000005020	ATL1	ENSSSCG00000051634	XLOC_048873
ENSSSCG00000008487	ATL2	ENSSSCG00000051661	XLOC_048887
ENSSSCG00000013054	ATL3	ENSSSCG00000051668	XLOC_048888
ENSSSCG00000025606	ATM	ENSSSCG00000051679	XLOC_048889
ENSSSCG00000025117	ATN1	ENSSSCG00000051710	XLOC_048890
ENSSSCG00000009196	ATOH1	ENSSSCG00000051717	XLOC_048893
ENSSSCG00000021995	ATOH7	ENSSSCG00000051737	XLOC_048899
ENSSSCG00000008230	ATOH8	ENSSSCG00000051754	XLOC_048901
ENSSSCG00000004617	ATOSA	ENSSSCG00000051787	XLOC_048905
ENSSSCG00000005301	ATOSB	ENSSSCG00000051799	XLOC_048909
ENSSSCG00000026414	ATOX1	ENSSSCG00000051801	XLOC_048910
ENSSSCG00000021527	ATP10B	ENSSSCG00000051803	XLOC_048924
ENSSSCG00000008812	ATP10D	ENSSSCG00000051804	XLOC_048925
ENSSSCG00000037561	ATP11A	ENSSSCG00000051809	XLOC_048933
ENSSSCG00000011772	ATP11B	ENSSSCG00000051810	XLOC_048937
ENSSSCG00000012713	ATP11C	ENSSSCG00000051812	XLOC_048943
ENSSSCG00000013930	ATP13A1	ENSSSCG00000051814	XLOC_048944
ENSSSCG00000031082	ATP13A2	ENSSSCG00000051815	XLOC_048975
ENSSSCG00000011825	ATP13A3	ENSSSCG00000051817	XLOC_048981
ENSSSCG00000006740	ATP1A1	ENSSSCG00000051820	XLOC_048982
ENSSSCG00000006391	ATP1A2	ENSSSCG00000051827	XLOC_048985
ENSSSCG00000003045	ATP1A3	ENSSSCG00000051832	XLOC_048997
ENSSSCG00000006296	ATP1B1	ENSSSCG00000051846	XLOC_049010
ENSSSCG00000017951	ATP1B2	ENSSSCG00000051856	XLOC_049017
ENSSSCG00000000453	ATP23	ENSSSCG00000051861	XLOC_049033
ENSSSCG00000007805	ATP2A1	ENSSSCG00000051862	XLOC_049039
ENSSSCG00000034386	ATP2A2	ENSSSCG00000051865	XLOC_049041
ENSSSCG00000017874	ATP2A3	ENSSSCG00000051872	XLOC_049043
ENSSSCG00000027898	ATP2B1	ENSSSCG00000051877	XLOC_049051
ENSSSCG00000023084	ATP2B2	ENSSSCG00000051884	XLOC_049064
ENSSSCG00000012769	ATP2B3	ENSSSCG00000051886	XLOC_049076
ENSSSCG00000015273	ATP2B4	ENSSSCG00000051889	XLOC_049091
ENSSSCG00000011183	ATP2C1	ENSSSCG00000051900	XLOC_049094
ENSSSCG00000002671	ATP2C2	ENSSSCG00000051910	XLOC_049107
ENSSSCG00000009561	ATP4B	ENSSSCG00000051913	XLOC_049109
ENSSSCG00000004499	ATP5F1A	ENSSSCG00000051930	XLOC_049122
ENSSSCG00000034086	ATP5F1C	ENSSSCG00000051934	XLOC_049124
ENSSSCG00000035532	ATP5F1D	ENSSSCG00000051936	XLOC_049154
ENSSSCG00000027072	ATP5IF1	ENSSSCG00000051938	XLOC_049163
ENSSSCG00000017544	ATP5MC1	ENSSSCG00000051941	XLOC_049165
ENSSSCG00000062561	ATP5MC2	ENSSSCG00000051957	XLOC_049169
ENSSSCG00000015973	ATP5MC3	ENSSSCG00000051960	XLOC_049170
ENSSSCG00000023903	ATP5ME	ENSSSCG00000051971	XLOC_049198
ENSSSCG00000032165	ATP5MK	ENSSSCG00000051977	XLOC_049202
ENSSSCG00000037772	ATP5PB	ENSSSCG00000051978	XLOC_049207
ENSSSCG00000038399	ATP5PF	ENSSSCG00000051992	XLOC_049208
ENSSSCG00000012042	ATP5PO	ENSSSCG00000051997	XLOC_049251
ENSSSCG00000018081	ATP6	ENSSSCG00000052004	XLOC_049252
ENSSSCG00000037310	ATP6AP1	ENSSSCG00000052020	XLOC_049264
ENSSSCG00000012247	ATP6AP2	ENSSSCG00000052021	XLOC_049272
ENSSSCG00000017401	ATP6V0A1	ENSSSCG00000052034	XLOC_049274
ENSSSCG00000009766	ATP6V0A2	ENSSSCG00000052036	XLOC_049280
ENSSSCG00000039267	ATP6V0B	ENSSSCG00000052042	XLOC_049296
ENSSSCG00000002776	ATP6V0D1	ENSSSCG00000052043	XLOC_049298
ENSSSCG00000055239	ATP6V0E2	ENSSSCG00000052061	XLOC_049300
ENSSSCG00000011916	ATP6V1A	ENSSSCG00000052066	XLOC_049301
ENSSSCG00000028694	ATP6V1B2	ENSSSCG00000052080	XLOC_049304
ENSSSCG00000006054	ATP6V1C1	ENSSSCG00000052081	XLOC_049309
ENSSSCG00000008634	ATP6V1C2	ENSSSCG00000052082	XLOC_049311
ENSSSCG00000033278	ATP6V1D	ENSSSCG00000052089	XLOC_049343
ENSSSCG00000008441	ATP6V1E2	ENSSSCG00000052091	XLOC_049348
ENSSSCG00000016577	ATP6V1F	ENSSSCG00000052096	XLOC_049378
ENSSSCG00000023540	ATP6V1FNB	ENSSSCG00000052109	XLOC_049381
ENSSSCG00000053522	ATP6V1G1	ENSSSCG00000052120	XLOC_049382
ENSSSCG00000001401	ATP6V1G2	ENSSSCG00000052125	XLOC_049392
ENSSSCG00000006263	ATP6V1H	ENSSSCG00000052130	XLOC_049393
ENSSSCG00000012437	ATP7A	ENSSSCG00000052134	XLOC_049408
ENSSSCG00000033570	ATP7B	ENSSSCG00000052147	XLOC_049413
ENSSSCG00000018080	ATP8	ENSSSCG00000052152	XLOC_049415
ENSSSCG00000008803	ATP8A1	ENSSSCG00000052153	XLOC_049449
ENSSSCG00000035421	ATP8A2	ENSSSCG00000052158	XLOC_049506
ENSSSCG00000004921	ATP8B1	ENSSSCG00000052162	XLOC_049527
ENSSSCG00000006550	ATP8B2	ENSSSCG00000052169	XLOC_049536
ENSSSCG00000013440	ATP8B3	ENSSSCG00000052174	XLOC_049547
ENSSSCG00000004646	ATP8B4	ENSSSCG00000052176	XLOC_049581
ENSSSCG00000007478	ATP9A	ENSSSCG00000052187	XLOC_049587
ENSSSCG00000004857	ATP9B	ENSSSCG00000052191	XLOC_049596
ENSSSCG00000038657	ATPAF1	ENSSSCG00000052198	XLOC_049613
ENSSSCG00000028712	ATPAF2	ENSSSCG00000052206	XLOC_049714
ENSSSCG00000036387	ATPSCKMT	ENSSSCG00000052207	XLOC_049715
ENSSSCG00000011679	ATR	ENSSSCG00000052213	XLOC_049720
ENSSSCG00000022058	ATRAID	ENSSSCG00000052219	XLOC_049721
ENSSSCG00000011359	ATRIP	ENSSSCG00000052221	XLOC_049754
ENSSSCG00000007153	ATRN	ENSSSCG00000052224	XLOC_049756
ENSSSCG00000010654	ATRNL1	ENSSSCG00000052225	XLOC_049757
ENSSSCG00000012434	ATRX	ENSSSCG00000052236	XLOC_049802
ENSSSCG00000001065	ATXN1	ENSSSCG00000052240	XLOC_049808
ENSSSCG00000024864	ATXN10	ENSSSCG00000052253	XLOC_049818
ENSSSCG00000038917	ATXN1L	ENSSSCG00000052255	XLOC_049821
ENSSSCG00000009834	ATXN2	ENSSSCG00000052265	XLOC_049840
ENSSSCG00000021845	ATXN2L	ENSSSCG00000052269	XLOC_049887
ENSSSCG00000002446	ATXN3	ENSSSCG00000052282	XLOC_049900
ENSSSCG00000011493	ATXN7	ENSSSCG00000052283	XLOC_049905
ENSSSCG00000015432	ATXN7L1	ENSSSCG00000052285	XLOC_049949
ENSSSCG00000006828	ATXN7L2	ENSSSCG00000052290	XLOC_049950
ENSSSCG00000017362	ATXN7L3	ENSSSCG00000052292	XLOC_049951
ENSSSCG00000054160	ATXN7L3B	ENSSSCG00000052295	XLOC_049957
ENSSSCG00000009591	AUH	ENSSSCG00000052297	XLOC_049987
ENSSSCG00000003552	AUNIP	ENSSSCG00000052305	XLOC_049999
ENSSSCG00000008268	AUP1	ENSSSCG00000052319	XLOC_050000
ENSSSCG00000038474	AURKAIP1	ENSSSCG00000052330	XLOC_050007
ENSSSCG00000028924	AURKB	ENSSSCG00000052331	XLOC_050011
ENSSSCG00000007727	AUTS2	ENSSSCG00000052334	XLOC_050044
ENSSSCG00000029474	AVEN	ENSSSCG00000052335	XLOC_050064
ENSSSCG00000029571	AVIL	ENSSSCG00000052336	XLOC_050081
ENSSSCG00000023445	AVL9	ENSSSCG00000052337	XLOC_050084
ENSSSCG00000036824	AVPI1	ENSSSCG00000052340	XLOC_050088
ENSSSCG00000033383	AVPR1A	ENSSSCG00000052348	XLOC_050099
ENSSSCG00000012789	AVPR2	ENSSSCG00000052352	XLOC_050137
ENSSSCG00000002980	AWN	ENSSSCG00000052359	XLOC_050138
ENSSSCG00000023204	AXIN1	ENSSSCG00000052366	XLOC_050147
ENSSSCG00000017265	AXIN2	ENSSSCG00000052372	XLOC_050148
ENSSSCG00000038806	AXL	ENSSSCG00000052373	XLOC_050151
ENSSSCG00000028258	AZI2	ENSSSCG00000052374	XLOC_050192
ENSSSCG00000023873	AZIN1	ENSSSCG00000052383	XLOC_050219
ENSSSCG00000003619	AZIN2	ENSSSCG00000052392	XLOC_050222
ENSSSCG00000051899	B2M	ENSSSCG00000052398	XLOC_050237
ENSSSCG00000021774	B3GALNT1	ENSSSCG00000052402	XLOC_050247
ENSSSCG00000033692	B3GALNT2	ENSSSCG00000052405	XLOC_050281
ENSSSCG00000034351	B3GALT1	ENSSSCG00000052408	XLOC_050282
ENSSSCG00000010800	B3GALT2	ENSSSCG00000052416	XLOC_050295
ENSSSCG00000001503	B3GALT4	ENSSSCG00000052443	XLOC_050307
ENSSSCG00000022151	B3GALT6	ENSSSCG00000052447	XLOC_050312
ENSSSCG00000026246	B3GAT2	ENSSSCG00000052451	XLOC_050316
ENSSSCG00000020809	B3GAT3	ENSSSCG00000052454	XLOC_050317
ENSSSCG00000009335	B3GLCT	ENSSSCG00000052458	XLOC_050321
ENSSSCG00000008374	B3GNT2	ENSSSCG00000052460	XLOC_050334
ENSSSCG00000013886	B3GNT3	ENSSSCG00000052462	XLOC_050339
ENSSSCG00000009798	B3GNT4	ENSSSCG00000052468	XLOC_050341
ENSSSCG00000024393	B3GNT5	ENSSSCG00000052475	XLOC_050343
ENSSSCG00000033015	B3GNT7	ENSSSCG00000052485	XLOC_050344
ENSSSCG00000032536	B3GNT8	ENSSSCG00000052506	XLOC_050361
ENSSSCG00000040139	B3GNT9	ENSSSCG00000052508	XLOC_050362
ENSSSCG00000027229	B3GNTL1	ENSSSCG00000052512	XLOC_050378
ENSSSCG00000000433	B4GALNT1	ENSSSCG00000052513	XLOC_050381
ENSSSCG00000033412	B4GALNT3	ENSSSCG00000052527	XLOC_050384
ENSSSCG00000033780	B4GALNT4	ENSSSCG00000052531	XLOC_050393
ENSSSCG00000035454	B4GALT1	ENSSSCG00000052534	XLOC_050399
ENSSSCG00000026793	B4GALT2	ENSSSCG00000052540	XLOC_050401
ENSSSCG00000006360	B4GALT3	ENSSSCG00000052557	XLOC_050404
ENSSSCG00000011903	B4GALT4	ENSSSCG00000052558	XLOC_050406
ENSSSCG00000007465	B4GALT5	ENSSSCG00000052566	XLOC_050407
ENSSSCG00000025005	B4GALT6	ENSSSCG00000052574	XLOC_050409
ENSSSCG00000014035	B4GALT7	ENSSSCG00000052575	XLOC_050420
ENSSSCG00000012940	B4GAT1	ENSSSCG00000052587	XLOC_050424
ENSSSCG00000039681	B9D1	ENSSSCG00000052588	XLOC_050427
ENSSSCG00000003013	B9D2	ENSSSCG00000052593	XLOC_050430
ENSSSCG00000059124	BAALC	ENSSSCG00000052596	XLOC_050431
ENSSSCG00000031073	BABAM1	ENSSSCG00000052598	XLOC_050432
ENSSSCG00000026465	BABAM2	ENSSSCG00000052602	XLOC_050433
ENSSSCG00000015079	BACE1	ENSSSCG00000052617	XLOC_050443
ENSSSCG00000012029	BACH1	ENSSSCG00000052618	XLOC_050444
ENSSSCG00000004332	BACH2	ENSSSCG00000052620	XLOC_050452
ENSSSCG00000013033	BAD	ENSSSCG00000052621	XLOC_050454
ENSSSCG00000010996	BAG1	ENSSSCG00000052628	XLOC_050469
ENSSSCG00000033526	BAG2	ENSSSCG00000052633	XLOC_050471
ENSSSCG00000010686	BAG3	ENSSSCG00000052641	XLOC_056464
ENSSSCG00000034468	BAG4	ENSSSCG00000052644	XLOC_056477
ENSSSCG00000037197	BAG5	ENSSSCG00000052646	XLOC_056489
ENSSSCG00000001410	BAG6	ENSSSCG00000052649	XLOC_056495
ENSSSCG00000023045	BAHCC1	ENSSSCG00000052651	XLOC_056506
ENSSSCG00000004772	BAHD1	ENSSSCG00000052652	XLOC_056567
ENSSSCG00000017142	BAIAP2	ENSSSCG00000052659	XLOC_056592
ENSSSCG00000007602	BAIAP2L1	ENSSSCG00000052661	XLOC_056613
ENSSSCG00000000111	BAIAP2L2	ENSSSCG00000052678	XLOC_056628
ENSSSCG00000008029	BAIAP3	ENSSSCG00000052685	XLOC_056637
ENSSSCG00000011014	BAMBI	ENSSSCG00000052688	XLOC_056654
ENSSSCG00000022361	BANK1	ENSSSCG00000052691	XLOC_056666
ENSSSCG00000020678	BANP	ENSSSCG00000052694	XLOC_056681
ENSSSCG00000011438	BAP1	ENSSSCG00000052700	XLOC_056683
ENSSSCG00000016170	BARD1	ENSSSCG00000052703	XLOC_056686
ENSSSCG00000055470	BATF	ENSSSCG00000052707	XLOC_056698
ENSSSCG00000023178	BATF2	ENSSSCG00000052708	XLOC_056720
ENSSSCG00000026587	BATF3	ENSSSCG00000052713	XLOC_056721
ENSSSCG00000061946	BAX	ENSSSCG00000052716	XLOC_056723
ENSSSCG00000001958	BAZ1A	ENSSSCG00000052722	XLOC_056725
ENSSSCG00000027342	BAZ1B	ENSSSCG00000052729	XLOC_056777
ENSSSCG00000000403	BAZ2A	ENSSSCG00000052733	XLOC_056832
ENSSSCG00000015882	BAZ2B	ENSSSCG00000052746	XLOC_056835
ENSSSCG00000003112	BBC3	ENSSSCG00000052756	XLOC_056846
ENSSSCG00000055707	BBIP1	ENSSSCG00000052762	XLOC_056859
ENSSSCG00000002356	BBOF1	ENSSSCG00000052769	XLOC_056862
ENSSSCG00000013337	BBOX1	ENSSSCG00000052789	XLOC_056867
ENSSSCG00000040416	BBS1	ENSSSCG00000052792	XLOC_056895
ENSSSCG00000000523	BBS10	ENSSSCG00000052793	XLOC_056896
ENSSSCG00000026290	BBS12	ENSSSCG00000052794	XLOC_056897
ENSSSCG00000025417	BBS2	ENSSSCG00000052803	XLOC_056909
ENSSSCG00000001924	BBS4	ENSSSCG00000052804	XLOC_056923
ENSSSCG00000015931	BBS5	ENSSSCG00000052811	XLOC_056925
ENSSSCG00000009093	BBS7	ENSSSCG00000052818	XLOC_056929
ENSSSCG00000024754	BBS9	ENSSSCG00000052819	XLOC_056935
ENSSSCG00000011943	BBX	ENSSSCG00000052828	XLOC_056948
ENSSSCG00000020657	BCAM	ENSSSCG00000052831	XLOC_056951
ENSSSCG00000006477	BCAN	ENSSSCG00000052835	XLOC_056963
ENSSSCG00000022869	BCAP29	ENSSSCG00000052837	XLOC_056969
ENSSSCG00000012772	BCAP31	ENSSSCG00000052843	XLOC_056975
ENSSSCG00000028878	BCAR1	ENSSSCG00000052845	XLOC_056985
ENSSSCG00000006893	BCAR3	ENSSSCG00000052853	XLOC_056986
ENSSSCG00000007485	BCAS1	ENSSSCG00000052861	XLOC_056990
ENSSSCG00000055502	BCAS2	ENSSSCG00000052864	XLOC_056995
ENSSSCG00000017676	BCAS3	ENSSSCG00000052865	XLOC_056998
ENSSSCG00000007472	BCAS4	ENSSSCG00000052868	XLOC_057043
ENSSSCG00000029163	BCAT1	ENSSSCG00000052875	XLOC_057044
ENSSSCG00000003139	BCAT2	ENSSSCG00000052876	XLOC_057052
ENSSSCG00000010743	BCCIP	ENSSSCG00000052885	XLOC_057076
ENSSSCG00000040144	BCDIN3D	ENSSSCG00000052887	XLOC_057099
ENSSSCG00000028794	BCKDHA	ENSSSCG00000052891	XLOC_057145
ENSSSCG00000004465	BCKDHB	ENSSSCG00000052899	XLOC_057160
ENSSSCG00000007763	BCKDK	ENSSSCG00000052902	XLOC_057163
ENSSSCG00000025691	BCL10	ENSSSCG00000052910	XLOC_057174
ENSSSCG00000008392	BCL11A	ENSSSCG00000052923	XLOC_057192
ENSSSCG00000002507	BCL11B	ENSSSCG00000052930	XLOC_057194
ENSSSCG00000062696	BCL2	ENSSSCG00000052936	XLOC_057197
ENSSSCG00000040010	BCL2A1	ENSSSCG00000052938	XLOC_057207
ENSSSCG00000035357	BCL2L1	ENSSSCG00000052949	XLOC_057247
ENSSSCG00000060053	BCL2L11	ENSSSCG00000052962	XLOC_057256
ENSSSCG00000040373	BCL2L13	ENSSSCG00000052966	XLOC_057257
ENSSSCG00000000623	BCL2L14	ENSSSCG00000052972	XLOC_057260
ENSSSCG00000038970	BCL2L15	ENSSSCG00000052976	XLOC_057279
ENSSSCG00000002023	BCL2L2	ENSSSCG00000052979	XLOC_057280
ENSSSCG00000027426	BCL3	ENSSSCG00000052992	XLOC_057289
ENSSSCG00000011810	BCL6	ENSSSCG00000053002	XLOC_057352
ENSSSCG00000017927	BCL6B	ENSSSCG00000053014	XLOC_057381
ENSSSCG00000009801	BCL7A	ENSSSCG00000053028	XLOC_057408
ENSSSCG00000007708	BCL7B	ENSSSCG00000053033	XLOC_057409
ENSSSCG00000007776	BCL7C	ENSSSCG00000053034	XLOC_057421
ENSSSCG00000006698	BCL9	ENSSSCG00000053036	XLOC_057427
ENSSSCG00000015099	BCL9L	ENSSSCG00000053042	XLOC_057431
ENSSSCG00000004163	BCLAF1	ENSSSCG00000053043	XLOC_057439
ENSSSCG00000023334	BCLAF3	ENSSSCG00000053052	XLOC_057447
ENSSSCG00000036572	BCO1	ENSSSCG00000053060	XLOC_057448
ENSSSCG00000015039	BCO2	ENSSSCG00000053064	XLOC_057450
ENSSSCG00000012241	BCOR	ENSSSCG00000053065	XLOC_057470
ENSSSCG00000012655	BCORL1	ENSSSCG00000053075	XLOC_057477
ENSSSCG00000010052	BCR	ENSSSCG00000053077	XLOC_057493
ENSSSCG00000035775	BCS1L	ENSSSCG00000053079	XLOC_057495
ENSSSCG00000024109	BDH1	ENSSSCG00000053082	XLOC_057506
ENSSSCG00000022282	BDH2	ENSSSCG00000053085	XLOC_057512
ENSSSCG00000027030	BDKRB2	ENSSSCG00000053087	XLOC_057526
ENSSSCG00000013333	BDNF	ENSSSCG00000053106	XLOC_057527
ENSSSCG00000016968	BDP1	ENSSSCG00000053108	XLOC_057535
ENSSSCG00000033191	BEAN1	ENSSSCG00000053111	XLOC_057536
ENSSSCG00000017386	BECN1	ENSSSCG00000053114	XLOC_057554
ENSSSCG00000031159	BEND3	ENSSSCG00000053129	XLOC_057564
ENSSSCG00000063412	BEND5	ENSSSCG00000053134	XLOC_057601
ENSSSCG00000001498	BEND6	ENSSSCG00000053135	XLOC_057645
ENSSSCG00000032984	BEND7	ENSSSCG00000053137	XLOC_057700
ENSSSCG00000023090	BEST1	ENSSSCG00000053144	XLOC_057702
ENSSSCG00000013733	BEST2	ENSSSCG00000053145	XLOC_057706
ENSSSCG00000003929	BEST4	ENSSSCG00000053146	XLOC_057711
ENSSSCG00000036385	BET1	ENSSSCG00000053152	XLOC_057721
ENSSSCG00000014556	BET1L	ENSSSCG00000053160	XLOC_057761
ENSSSCG00000012525	BEX1	ENSSSCG00000053174	XLOC_057775
ENSSSCG00000012528	BEX3	ENSSSCG00000053175	XLOC_057786
ENSSSCG00000022635	BEX4	ENSSSCG00000053178	XLOC_057813
ENSSSCG00000012514	BEX5	ENSSSCG00000053179	XLOC_057889
ENSSSCG00000037673	BFAR	ENSSSCG00000053182	XLOC_057912
ENSSSCG00000055767	BGLAP	ENSSSCG00000053183	XLOC_057915
ENSSSCG00000012766	BGN	ENSSSCG00000053184	XLOC_057916
ENSSSCG00000038489	BHLHA15	ENSSSCG00000053188	XLOC_057940
ENSSSCG00000059145	BHLHE22	ENSSSCG00000053197	XLOC_057942
ENSSSCG00000036136	BHLHE40	ENSSSCG00000053204	XLOC_058029
ENSSSCG00000028552	BHLHE41	ENSSSCG00000053206	XLOC_058061
ENSSSCG00000010204	BICC1	ENSSSCG00000053219	XLOC_058081
ENSSSCG00000000531	BICD1	ENSSSCG00000053231	XLOC_058114
ENSSSCG00000027166	BICD2	ENSSSCG00000053235	XLOC_058118
ENSSSCG00000009896	BICDL1	ENSSSCG00000053237	XLOC_058123
ENSSSCG00000020895	BICDL2	ENSSSCG00000053246	XLOC_058124
ENSSSCG00000022302	BICRA	ENSSSCG00000053247	XLOC_058158
ENSSSCG00000001646	BICRAL	ENSSSCG00000053284	XLOC_058164
ENSSSCG00000000769	BID	ENSSSCG00000053289	XLOC_058172
ENSSSCG00000015720	BIN1	ENSSSCG00000053290	XLOC_058174
ENSSSCG00000000223	BIN2	ENSSSCG00000053298	XLOC_058197
ENSSSCG00000009629	BIN3	ENSSSCG00000053301	XLOC_058200
ENSSSCG00000063374	BIRC2	ENSSSCG00000053307	XLOC_058233
ENSSSCG00000027529	BIRC3	ENSSSCG00000053318	XLOC_058234
ENSSSCG00000040486	BIRC5	ENSSSCG00000053324	XLOC_058286
ENSSSCG00000008513	BIRC6	ENSSSCG00000053327	XLOC_058293
ENSSSCG00000009534	BIVM	ENSSSCG00000053329	XLOC_058298
ENSSSCG00000063164	BLCAP	ENSSSCG00000053337	XLOC_058306
ENSSSCG00000027568	BLK	ENSSSCG00000053345	XLOC_058308
ENSSSCG00000001816	BLM	ENSSSCG00000053350	XLOC_058309
ENSSSCG00000017796	BLMH	ENSSSCG00000053352	XLOC_058310
ENSSSCG00000010504	BLNK	ENSSSCG00000053361	XLOC_058311
ENSSSCG00000000359	BLOC1S1	ENSSSCG00000053365	XLOC_058333
ENSSSCG00000010551	BLOC1S2	ENSSSCG00000053368	XLOC_058354
ENSSSCG00000059110	BLOC1S4	ENSSSCG00000053369	XLOC_058497
ENSSSCG00000040593	BLOC1S5	ENSSSCG00000053381	XLOC_058498
ENSSSCG00000037384	BLOC1S6	ENSSSCG00000053382	XLOC_058502
ENSSSCG00000009090	BLTP1	ENSSSCG00000053397	XLOC_058510
ENSSSCG00000017764	BLTP2	ENSSSCG00000053399	XLOC_058548
ENSSSCG00000001532	BLTP3A	ENSSSCG00000053400	XLOC_058556
ENSSSCG00000026697	BLTP3B	ENSSSCG00000053401	XLOC_058564
ENSSSCG00000016756	BLVRA	ENSSSCG00000053404	XLOC_058573
ENSSSCG00000021067	BLVRB	ENSSSCG00000053413	XLOC_058580
ENSSSCG00000022396	BLZF1	ENSSSCG00000053419	XLOC_058602
ENSSSCG00000013397	BMAL1	ENSSSCG00000053426	XLOC_058647
ENSSSCG00000000551	BMAL2	ENSSSCG00000053428	XLOC_058686
ENSSSCG00000032956	BMERB1	ENSSSCG00000053430	XLOC_058709
ENSSSCG00000035284	BMF	ENSSSCG00000053433	XLOC_058718
ENSSSCG00000011081	BMI1	ENSSSCG00000053441	XLOC_058909
ENSSSCG00000009620	BMP1	ENSSSCG00000053446	XLOC_058910
ENSSSCG00000039442	BMP2	ENSSSCG00000053448	XLOC_058915
ENSSSCG00000027722	BMP2K	ENSSSCG00000053450	XLOC_058922
ENSSSCG00000029061	BMP3	ENSSSCG00000053453	XLOC_058940
ENSSSCG00000005045	BMP4	ENSSSCG00000053460	XLOC_059019
ENSSSCG00000001478	BMP5	ENSSSCG00000053461	XLOC_059033
ENSSSCG00000001027	BMP6	ENSSSCG00000053467	XLOC_059041
ENSSSCG00000007501	BMP7	ENSSSCG00000053471	XLOC_059072
ENSSSCG00000016665	BMPER	ENSSSCG00000053480	XLOC_059094
ENSSSCG00000010360	BMPR1A	ENSSSCG00000053486	XLOC_059106
ENSSSCG00000029621	BMPR1B	ENSSSCG00000053489	XLOC_059119
ENSSSCG00000016113	BMPR2	ENSSSCG00000053497	XLOC_059121
ENSSSCG00000010198	BMS1	ENSSSCG00000053498	XLOC_059127
ENSSSCG00000021466	BMT2	ENSSSCG00000053503	XLOC_059133
ENSSSCG00000012137	BMX	ENSSSCG00000053509	XLOC_059144
ENSSSCG00000001798	BNC1	ENSSSCG00000053511	XLOC_059152
ENSSSCG00000005180	BNC2	ENSSSCG00000053524	XLOC_059153
ENSSSCG00000016985	BNIP1	ENSSSCG00000053525	XLOC_059162
ENSSSCG00000004582	BNIP2	ENSSSCG00000053534	XLOC_059163
ENSSSCG00000024388	BNIP3	ENSSSCG00000053536	XLOC_059168
ENSSSCG00000009658	BNIP3L	ENSSSCG00000053559	XLOC_059173
ENSSSCG00000001560	BNIP5	ENSSSCG00000053560	XLOC_059180
ENSSSCG00000006640	BNIPL	ENSSSCG00000053570	XLOC_059185
ENSSSCG00000025826	BOC	ENSSSCG00000053575	XLOC_059192
ENSSSCG00000008735	BOD1L1	ENSSSCG00000053578	XLOC_059203
ENSSSCG00000032684	BOK	ENSSSCG00000053584	XLOC_059214
ENSSSCG00000006667	BOLA1	ENSSSCG00000053585	XLOC_059228
ENSSSCG00000005920	BOP1	ENSSSCG00000053605	XLOC_059230
ENSSSCG00000025120	BORA	ENSSSCG00000053608	XLOC_059249
ENSSSCG00000032804	BORCS5	ENSSSCG00000053611	XLOC_059261
ENSSSCG00000028788	BORCS6	ENSSSCG00000053620	XLOC_059344
ENSSSCG00000038633	BORCS7	ENSSSCG00000053624	XLOC_059345
ENSSSCG00000044084	BORCS8	ENSSSCG00000053633	XLOC_059346
ENSSSCG00000039425	BPGM	ENSSSCG00000053635	XLOC_059350
ENSSSCG00000001008	BPHL	ENSSSCG00000053639	XLOC_059362
ENSSSCG00000026605	BPI	ENSSSCG00000053642	XLOC_059375
ENSSSCG00000029714	BPIFB2	ENSSSCG00000053646	XLOC_059410
ENSSSCG00000026137	BPIFB3	ENSSSCG00000053657	XLOC_059425
ENSSSCG00000000157	BPIFC	ENSSSCG00000053663	XLOC_059429
ENSSSCG00000010822	BPNT1	ENSSSCG00000053665	XLOC_059444
ENSSSCG00000032846	BPNT2	ENSSSCG00000053685	XLOC_059451
ENSSSCG00000033528	BPTF	ENSSSCG00000053686	XLOC_059454
ENSSSCG00000016494	BRAF	ENSSSCG00000053687	XLOC_059465
ENSSSCG00000040595	BRAP	ENSSSCG00000053688	XLOC_059479
ENSSSCG00000007563	BRAT1	ENSSSCG00000053689	XLOC_059512
ENSSSCG00000022101	BRCA1	ENSSSCG00000053695	XLOC_059518
ENSSSCG00000029039	BRCA2	ENSSSCG00000053697	XLOC_059520
ENSSSCG00000012813	BRCC3	ENSSSCG00000053704	XLOC_059528
ENSSSCG00000032820	BRD1	ENSSSCG00000053715	XLOC_059570
ENSSSCG00000001471	BRD2	ENSSSCG00000053718	XLOC_059571
ENSSSCG00000005749	BRD3	ENSSSCG00000053719	XLOC_059584
ENSSSCG00000055491	BRD3OS	ENSSSCG00000053731	XLOC_059604
ENSSSCG00000022227	BRD4	ENSSSCG00000053739	XLOC_059606
ENSSSCG00000014327	BRD8	ENSSSCG00000053751	XLOC_059627
ENSSSCG00000035118	BRD9	ENSSSCG00000053752	XLOC_059629
ENSSSCG00000031710	BRF1	ENSSSCG00000053754	XLOC_059631
ENSSSCG00000040833	BRF2	ENSSSCG00000053758	XLOC_059632
ENSSSCG00000037605	BRI3	ENSSSCG00000053771	XLOC_059638
ENSSSCG00000054264	BRI3BP	ENSSSCG00000053773	XLOC_059639
ENSSSCG00000005504	BRINP1	ENSSSCG00000053775	XLOC_059648
ENSSSCG00000010809	BRINP3	ENSSSCG00000053778	XLOC_059650
ENSSSCG00000021384	BRIP1	ENSSSCG00000053787	XLOC_059664
ENSSSCG00000016827	BRIX1	ENSSSCG00000053789	XLOC_059666
ENSSSCG00000011565	BRK1	ENSSSCG00000053792	XLOC_059677
ENSSSCG00000012939	BRMS1	ENSSSCG00000053801	XLOC_059696
ENSSSCG00000001947	BRMS1L	ENSSSCG00000053803	XLOC_059701
ENSSSCG00000010836	BROX	ENSSSCG00000053811	XLOC_059711
ENSSSCG00000011548	BRPF1	ENSSSCG00000053817	XLOC_059723
ENSSSCG00000020803	BRPF3	ENSSSCG00000053820	XLOC_059739
ENSSSCG00000032656	BRSK1	ENSSSCG00000053821	XLOC_059748
ENSSSCG00000037337	BRSK2	ENSSSCG00000053828	XLOC_059776
ENSSSCG00000021042	BRWD1	ENSSSCG00000053833	XLOC_059787
ENSSSCG00000025156	BRWD3	ENSSSCG00000053834	XLOC_059829
ENSSSCG00000020823	BSCL2	ENSSSCG00000053842	XLOC_059831
ENSSSCG00000026392	BSDC1	ENSSSCG00000053849	XLOC_059833
ENSSSCG00000011384	BSN	ENSSSCG00000053850	XLOC_059834
ENSSSCG00000021173	BSPRY	ENSSSCG00000053852	XLOC_059843
ENSSSCG00000028359	BST1	ENSSSCG00000053860	XLOC_059868
ENSSSCG00000010467	BTAF1	ENSSSCG00000053862	XLOC_059874
ENSSSCG00000001801	BTBD1	ENSSSCG00000053878	XLOC_059875
ENSSSCG00000010701	BTBD16	ENSSSCG00000053883	XLOC_059878
ENSSSCG00000013175	BTBD18	ENSSSCG00000053885	XLOC_059886
ENSSSCG00000003926	BTBD19	ENSSSCG00000053892	XLOC_059910
ENSSSCG00000013444	BTBD2	ENSSSCG00000053896	XLOC_059915
ENSSSCG00000020853	BTBD3	ENSSSCG00000053897	XLOC_059920
ENSSSCG00000035555	BTBD6	ENSSSCG00000053920	XLOC_059930
ENSSSCG00000002461	BTBD7	ENSSSCG00000053925	XLOC_059941
ENSSSCG00000035196	BTBD8	ENSSSCG00000053935	XLOC_059956
ENSSSCG00000037507	BTBD9	ENSSSCG00000053939	XLOC_059978
ENSSSCG00000008965	BTC	ENSSSCG00000053946	XLOC_059981
ENSSSCG00000011193	BTD	ENSSSCG00000053953	XLOC_060069
ENSSSCG00000038762	BTF3L4	ENSSSCG00000053957	XLOC_060090
ENSSSCG00000035790	BTG1	ENSSSCG00000053964	XLOC_060092
ENSSSCG00000055218	BTG2	ENSSSCG00000053970	XLOC_060096
ENSSSCG00000012014	BTG3	ENSSSCG00000053976	XLOC_060115
ENSSSCG00000026742	BTK	ENSSSCG00000053982	XLOC_060124
ENSSSCG00000001132	BTN1A1	ENSSSCG00000053983	XLOC_060156
ENSSSCG00000025071	BTNL2	ENSSSCG00000053984	XLOC_060159
ENSSSCG00000028567	BTNL9	ENSSSCG00000053999	XLOC_060180
ENSSSCG00000010563	BTRC	ENSSSCG00000054004	XLOC_060182
ENSSSCG00000030469	BUB1	ENSSSCG00000054010	XLOC_060183
ENSSSCG00000004782	BUB1B	ENSSSCG00000054017	XLOC_060188
ENSSSCG00000010726	BUB3	ENSSSCG00000054024	XLOC_060197
ENSSSCG00000015065	BUD13	ENSSSCG00000054028	XLOC_060203
ENSSSCG00000007713	BUD23	ENSSSCG00000054037	XLOC_060220
ENSSSCG00000007623	BUD31	ENSSSCG00000054038	XLOC_060230
ENSSSCG00000004366	BVES	ENSSSCG00000054039	XLOC_060237
ENSSSCG00000026752	BYSL	ENSSSCG00000054042	XLOC_060251
ENSSSCG00000016094	BZW1	ENSSSCG00000054049	XLOC_060296
ENSSSCG00000023118	BZW2	ENSSSCG00000054060	XLOC_060307
ENSSSCG00000040426	C10orf143	ENSSSCG00000054076	XLOC_060381
ENSSSCG00000014634	C11orf42	ENSSSCG00000054077	XLOC_060383
ENSSSCG00000015035	C11orf52	ENSSSCG00000054085	XLOC_060397
ENSSSCG00000014948	C11orf54	ENSSSCG00000054089	XLOC_060442
ENSSSCG00000040570	C11orf58	ENSSSCG00000054093	XLOC_060444
ENSSSCG00000015008	C11orf65	ENSSSCG00000054102	XLOC_060462
ENSSSCG00000012966	C11orf68	ENSSSCG00000054112	XLOC_060464
ENSSSCG00000036867	C11orf71	ENSSSCG00000054118	XLOC_060484
ENSSSCG00000029902	C11orf80	ENSSSCG00000054119	XLOC_060490
ENSSSCG00000040729	C11orf86	ENSSSCG00000054120	XLOC_060532
ENSSSCG00000056689	C11orf94	ENSSSCG00000054129	XLOC_060536
ENSSSCG00000014957	C11orf97	ENSSSCG00000054130	XLOC_060559
ENSSSCG00000058339	C11orf98	ENSSSCG00000054135	XLOC_060578
ENSSSCG00000000925	C12orf29	ENSSSCG00000054137	XLOC_060581
ENSSSCG00000000723	C12orf4	ENSSSCG00000054139	XLOC_060583
ENSSSCG00000024329	C12orf43	ENSSSCG00000054147	XLOC_060585
ENSSSCG00000000924	C12orf50	ENSSSCG00000054158	XLOC_060621
ENSSSCG00000040186	C12orf57	ENSSSCG00000054161	XLOC_060627
ENSSSCG00000056928	C12orf73	ENSSSCG00000054162	XLOC_060628
ENSSSCG00000031661	C12orf75	ENSSSCG00000054168	XLOC_060644
ENSSSCG00000040422	C12orf76	ENSSSCG00000054169	XLOC_060691
ENSSSCG00000002035	C14orf119	ENSSSCG00000054173	XLOC_060754
ENSSSCG00000033807	C14orf132	ENSSSCG00000054174	XLOC_060757
ENSSSCG00000030679	C14orf28	ENSSSCG00000054181	XLOC_060758
ENSSSCG00000031452	C14orf93	ENSSSCG00000054189	XLOC_060759
ENSSSCG00000001885	C15orf39	ENSSSCG00000054191	XLOC_060762
ENSSSCG00000030131	C15orf40	ENSSSCG00000054201	XLOC_060763
ENSSSCG00000004670	C15orf48	ENSSSCG00000054203	XLOC_060783
ENSSSCG00000004954	C15orf61	ENSSSCG00000054205	XLOC_060822
ENSSSCG00000032022	C15orf62	ENSSSCG00000054207	XLOC_060827
ENSSSCG00000035388	C16orf46	ENSSSCG00000054210	XLOC_060836
ENSSSCG00000059578	C16orf74	ENSSSCG00000054213	XLOC_060880
ENSSSCG00000022333	C16orf87	ENSSSCG00000054216	XLOC_060891
ENSSSCG00000038882	C16orf91	ENSSSCG00000054246	XLOC_060906
ENSSSCG00000017417	C17orf113	ENSSSCG00000054256	XLOC_060920
ENSSSCG00000017928	C17orf49	ENSSSCG00000054262	XLOC_060925
ENSSSCG00000032181	C17orf58	ENSSSCG00000054263	XLOC_060935
ENSSSCG00000017733	C17orf75	ENSSSCG00000054266	XLOC_060971
ENSSSCG00000017696	C17orf78	ENSSSCG00000054269	XLOC_060998
ENSSSCG00000017246	C17orf80	ENSSSCG00000054293	XLOC_061010
ENSSSCG00000037753	C17orf98	ENSSSCG00000054300	XLOC_061019
ENSSSCG00000030002	C18orf21	ENSSSCG00000054302	XLOC_061068
ENSSSCG00000004500	C18orf25	ENSSSCG00000054306	XLOC_061073
ENSSSCG00000034415	C18orf32	ENSSSCG00000054312	XLOC_061131
ENSSSCG00000004531	C18orf54	ENSSSCG00000054319	XLOC_061243
ENSSSCG00000032153	C19orf12	ENSSSCG00000054323	XLOC_061277
ENSSSCG00000022265	C19orf25	ENSSSCG00000054324	XLOC_061299
ENSSSCG00000013632	C19orf38	ENSSSCG00000054331	XLOC_061336
ENSSSCG00000013859	C19orf44	ENSSSCG00000054332	XLOC_061344
ENSSSCG00000027016	C19orf47	ENSSSCG00000054348	XLOC_061373
ENSSSCG00000013757	C19orf53	ENSSSCG00000054350	XLOC_061382
ENSSSCG00000040533	C19orf54	ENSSSCG00000054354	XLOC_061469
ENSSSCG00000013769	C19orf67	ENSSSCG00000054356	XLOC_061492
ENSSSCG00000037098	C19orf81	ENSSSCG00000054363	XLOC_061500
ENSSSCG00000039331	C1D	ENSSSCG00000054367	XLOC_061506
ENSSSCG00000031550	C1orf105	ENSSSCG00000054369	XLOC_061508
ENSSSCG00000039905	C1orf109	ENSSSCG00000054371	XLOC_061535
ENSSSCG00000006284	C1orf112	ENSSSCG00000054378	XLOC_061558
ENSSSCG00000027882	C1orf115	ENSSSCG00000054385	XLOC_061585
ENSSSCG00000032446	C1orf116	ENSSSCG00000054386	XLOC_061586
ENSSSCG00000038888	C1orf122	ENSSSCG00000054391	XLOC_061594
ENSSSCG00000010176	C1orf131	ENSSSCG00000054395	XLOC_061599
ENSSSCG00000003803	C1orf141	ENSSSCG00000054396	XLOC_061626
ENSSSCG00000042806	C1orf146	ENSSSCG00000054399	XLOC_061646
ENSSSCG00000031102	C1orf174	ENSSSCG00000054404	XLOC_061650
ENSSSCG00000031188	C1orf185	ENSSSCG00000054417	XLOC_061655
ENSSSCG00000010181	C1orf198	ENSSSCG00000054423	XLOC_061665
ENSSSCG00000003951	C1orf210	ENSSSCG00000054432	XLOC_061668
ENSSSCG00000037600	C1orf216	ENSSSCG00000054438	XLOC_061681
ENSSSCG00000041671	C1orf232	ENSSSCG00000054443	XLOC_061686
ENSSSCG00000013991	C1orf35	ENSSSCG00000054445	XLOC_079453
ENSSSCG00000006554	C1orf43	ENSSSCG00000054448	XLOC_079454
ENSSSCG00000026772	C1orf52	ENSSSCG00000054449	XLOC_079458
ENSSSCG00000032380	C1orf53	ENSSSCG00000054451	XLOC_079471
ENSSSCG00000045950	C1orf54	ENSSSCG00000054458	XLOC_079513
ENSSSCG00000006639	C1orf56	ENSSSCG00000054460	XLOC_079518
ENSSSCG00000015613	C1orf74	ENSSSCG00000054467	XLOC_079519
ENSSSCG00000003524	C1QA	ENSSSCG00000054476	XLOC_079563
ENSSSCG00000033512	C1QB	ENSSSCG00000054481	XLOC_079567
ENSSSCG00000035048	C1QBP	ENSSSCG00000054485	XLOC_079587
ENSSSCG00000038706	C1QC	ENSSSCG00000054499	XLOC_079595
ENSSSCG00000039101	C1QL1	ENSSSCG00000054510	XLOC_079630
ENSSSCG00000011043	C1QL3	ENSSSCG00000054525	XLOC_079636
ENSSSCG00000000197	C1QL4	ENSSSCG00000054530	XLOC_079637
ENSSSCG00000035511	C1QTNF1	ENSSSCG00000054534	XLOC_079640
ENSSSCG00000003333	C1QTNF12	ENSSSCG00000054537	XLOC_079643
ENSSSCG00000035993	C1QTNF2	ENSSSCG00000054545	XLOC_079647
ENSSSCG00000016823	C1QTNF3	ENSSSCG00000054547	XLOC_079655
ENSSSCG00000013231	C1QTNF4	ENSSSCG00000054551	XLOC_079658
ENSSSCG00000054880	C1QTNF5	ENSSSCG00000054557	XLOC_079660
ENSSSCG00000055678	C1QTNF6	ENSSSCG00000054559	XLOC_079683
ENSSSCG00000008737	C1QTNF7	ENSSSCG00000054567	XLOC_079687
ENSSSCG00000060530	C1R	ENSSSCG00000054574	XLOC_079709
ENSSSCG00000033913	C1RL	ENSSSCG00000054575	XLOC_079712
ENSSSCG00000055651	C1S	ENSSSCG00000054580	XLOC_079713
ENSSSCG00000001422	C2	ENSSSCG00000054597	XLOC_079714
ENSSSCG00000055892	C20orf204	ENSSSCG00000054602	XLOC_079763
ENSSSCG00000035666	C20orf27	ENSSSCG00000054608	XLOC_079769
ENSSSCG00000007212	C20orf96	ENSSSCG00000054616	XLOC_079776
ENSSSCG00000012038	C21orf62	ENSSSCG00000054621	XLOC_079809
ENSSSCG00000033025	C21orf91	ENSSSCG00000054625	XLOC_079810
ENSSSCG00000000117	C22orf23	ENSSSCG00000054628	XLOC_079839
ENSSSCG00000040740	C22orf39	ENSSSCG00000054634	XLOC_079860
ENSSSCG00000025821	C2CD2	ENSSSCG00000054636	XLOC_079898
ENSSSCG00000015111	C2CD2L	ENSSSCG00000054643	XLOC_079906
ENSSSCG00000014835	C2CD3	ENSSSCG00000054646	XLOC_079907
ENSSSCG00000021540	C2CD4D	ENSSSCG00000054652	XLOC_079909
ENSSSCG00000000570	C2CD5	ENSSSCG00000054654	XLOC_079912
ENSSSCG00000054074	C2orf15	ENSSSCG00000054658	XLOC_079913
ENSSSCG00000008332	C2orf42	ENSSSCG00000054668	XLOC_079916
ENSSSCG00000035390	C2orf49	ENSSSCG00000054673	XLOC_079929
ENSSSCG00000061027	C2orf66	ENSSSCG00000054682	XLOC_079930
ENSSSCG00000028287	C2orf68	ENSSSCG00000054688	XLOC_079931
ENSSSCG00000016086	C2orf69	ENSSSCG00000054692	XLOC_079941
ENSSSCG00000016270	C2orf72	ENSSSCG00000054710	XLOC_079947
ENSSSCG00000015718	C2orf76	ENSSSCG00000054712	XLOC_079956
ENSSSCG00000033941	C2orf88	ENSSSCG00000054714	XLOC_079982
ENSSSCG00000013551	C3	ENSSSCG00000054716	XLOC_079993
ENSSSCG00000011486	C3orf14	ENSSSCG00000054719	XLOC_080001
ENSSSCG00000037433	C3orf18	ENSSSCG00000054722	XLOC_080008
ENSSSCG00000034645	C3orf38	ENSSSCG00000054724	XLOC_080022
ENSSSCG00000033637	C3orf52	ENSSSCG00000054729	XLOC_080025
ENSSSCG00000056386	C3orf62	ENSSSCG00000054730	XLOC_080044
ENSSSCG00000038724	C3orf70	ENSSSCG00000054733	XLOC_080055
ENSSSCG00000035935	C3orf80	ENSSSCG00000054734	XLOC_080088
ENSSSCG00000058399	C3orf84	ENSSSCG00000054743	XLOC_080092
ENSSSCG00000032588	C3orf85	ENSSSCG00000054744	XLOC_080137
ENSSSCG00000015661	C4BPB	ENSSSCG00000054751	XLOC_080138
ENSSSCG00000009181	C4orf17	ENSSSCG00000054752	XLOC_080198
ENSSSCG00000008771	C4orf19	ENSSSCG00000054754	XLOC_080222
ENSSSCG00000031773	C4orf3	ENSSSCG00000054756	XLOC_080267
ENSSSCG00000061764	C4orf33	ENSSSCG00000054758	XLOC_080268
ENSSSCG00000032190	C4orf36	ENSSSCG00000054761	XLOC_080285
ENSSSCG00000037757	C4orf45	ENSSSCG00000054762	XLOC_080292
ENSSSCG00000028492	C4orf46	ENSSSCG00000054768	XLOC_080312
ENSSSCG00000015794	C4orf47	ENSSSCG00000054769	XLOC_080350
ENSSSCG00000063120	C4orf48	ENSSSCG00000054774	XLOC_080351
ENSSSCG00000042317	C4orf51	ENSSSCG00000054775	XLOC_080359
ENSSSCG00000005512	C5	ENSSSCG00000054787	XLOC_080368
ENSSSCG00000056729	C5AR1	ENSSSCG00000054797	XLOC_080375
ENSSSCG00000003113	C5AR2	ENSSSCG00000054798	XLOC_080385
ENSSSCG00000032323	C5orf15	ENSSSCG00000054803	XLOC_080401
ENSSSCG00000016808	C5orf22	ENSSSCG00000054804	XLOC_080427
ENSSSCG00000034954	C5orf24	ENSSSCG00000054805	XLOC_080431
ENSSSCG00000016876	C5orf34	ENSSSCG00000054809	XLOC_080439
ENSSSCG00000017098	C5orf49	ENSSSCG00000054814	XLOC_080467
ENSSSCG00000010014	C5orf52	ENSSSCG00000054818	XLOC_080468
ENSSSCG00000014250	C5orf63	ENSSSCG00000054819	XLOC_080469
ENSSSCG00000016861	C6	ENSSSCG00000054823	XLOC_080473
ENSSSCG00000038931	C6orf120	ENSSSCG00000054827	XLOC_080475
ENSSSCG00000036801	C6orf132	ENSSSCG00000054828	XLOC_080519
ENSSSCG00000025943	C6orf136	ENSSSCG00000054837	XLOC_080537
ENSSSCG00000001040	C6orf52	ENSSSCG00000054839	XLOC_080538
ENSSSCG00000038752	C6orf62	ENSSSCG00000054842	XLOC_080552
ENSSSCG00000035341	C6orf89	ENSSSCG00000054843	XLOC_080615
ENSSSCG00000016859	C7	ENSSSCG00000054846	XLOC_080620
ENSSSCG00000016760	C7orf25	ENSSSCG00000054859	XLOC_080624
ENSSSCG00000038777	C7orf50	ENSSSCG00000054863	XLOC_080627
ENSSSCG00000003834	C8B	ENSSSCG00000054867	XLOC_080642
ENSSSCG00000005840	C8G	ENSSSCG00000054870	XLOC_080644
ENSSSCG00000035887	C8orf34	ENSSSCG00000054879	XLOC_080646
ENSSSCG00000006972	C8orf48	ENSSSCG00000054883	XLOC_080651
ENSSSCG00000009627	C8orf58	ENSSSCG00000054886	XLOC_080654
ENSSSCG00000021744	C8orf76	ENSSSCG00000054929	XLOC_080656
ENSSSCG00000005895	C8orf82	ENSSSCG00000054930	XLOC_080667
ENSSSCG00000040562	C8orf88	ENSSSCG00000054931	XLOC_080708
ENSSSCG00000032228	C8orf89	ENSSSCG00000054932	XLOC_080724
ENSSSCG00000016856	C9	ENSSSCG00000054940	XLOC_080729
ENSSSCG00000005298	C9orf131	ENSSSCG00000054943	XLOC_080742
ENSSSCG00000005452	C9orf152	ENSSSCG00000054944	XLOC_080747
ENSSSCG00000031382	C9orf40	ENSSSCG00000054949	XLOC_080757
ENSSSCG00000034203	C9orf64	ENSSSCG00000054954	XLOC_080760
ENSSSCG00000011010	C9orf72	ENSSSCG00000054957	XLOC_080783
ENSSSCG00000030426	C9orf78	ENSSSCG00000054958	XLOC_080792
ENSSSCG00000031105	C9orf85	ENSSSCG00000054960	XLOC_080869
ENSSSCG00000023169	CA10	ENSSSCG00000054962	XLOC_080870
ENSSSCG00000003147	CA11	ENSSSCG00000054963	XLOC_080930
ENSSSCG00000004565	CA12	ENSSSCG00000054974	XLOC_080993
ENSSSCG00000006143	CA13	ENSSSCG00000054979	XLOC_081001
ENSSSCG00000027875	CA14	ENSSSCG00000054988	XLOC_081002
ENSSSCG00000006140	CA2	ENSSSCG00000054991	XLOC_081023
ENSSSCG00000023186	CA4	ENSSSCG00000054993	XLOC_081024
ENSSSCG00000035629	CA5A	ENSSSCG00000054996	XLOC_081047
ENSSSCG00000038785	CA7	ENSSSCG00000055004	XLOC_081058
ENSSSCG00000006233	CA8	ENSSSCG00000055013	XLOC_081071
ENSSSCG00000059309	CA9	ENSSSCG00000055015	XLOC_081118
ENSSSCG00000053029	CAAP1	ENSSSCG00000055016	XLOC_081120
ENSSSCG00000016266	CAB39	ENSSSCG00000055023	XLOC_081130
ENSSSCG00000009397	CAB39L	ENSSSCG00000055030	XLOC_081134
ENSSSCG00000033268	CABCOCO1	ENSSSCG00000055033	XLOC_081167
ENSSSCG00000010062	CABIN1	ENSSSCG00000055035	XLOC_081172
ENSSSCG00000003705	CABLES1	ENSSSCG00000055043	XLOC_081173
ENSSSCG00000007540	CABLES2	ENSSSCG00000055047	XLOC_081175
ENSSSCG00000056057	CABP1	ENSSSCG00000055048	XLOC_081176
ENSSSCG00000025869	CABP7	ENSSSCG00000055054	XLOC_081262
ENSSSCG00000003711	CABYR	ENSSSCG00000055056	XLOC_081282
ENSSSCG00000040709	CACFD1	ENSSSCG00000055059	XLOC_081286
ENSSSCG00000004829	CACHD1	ENSSSCG00000055061	XLOC_081338
ENSSSCG00000013754	CACNA1A	ENSSSCG00000055065	XLOC_081349
ENSSSCG00000033493	CACNA1B	ENSSSCG00000055080	XLOC_081350
ENSSSCG00000041764	CACNA1C	ENSSSCG00000055085	XLOC_081381
ENSSSCG00000011455	CACNA1D	ENSSSCG00000055087	XLOC_081395
ENSSSCG00000015543	CACNA1E	ENSSSCG00000055088	XLOC_081399
ENSSSCG00000017562	CACNA1G	ENSSSCG00000055092	XLOC_081400
ENSSSCG00000034266	CACNA1H	ENSSSCG00000055093	XLOC_081430
ENSSSCG00000015402	CACNA2D1	ENSSSCG00000055095	XLOC_081458
ENSSSCG00000027019	CACNA2D3	ENSSSCG00000055103	XLOC_081462
ENSSSCG00000026537	CACNA2D4	ENSSSCG00000055107	XLOC_081475
ENSSSCG00000017510	CACNB1	ENSSSCG00000055111	XLOC_081490
ENSSSCG00000011040	CACNB2	ENSSSCG00000055120	XLOC_081495
ENSSSCG00000032967	CACNB3	ENSSSCG00000055122	XLOC_081498
ENSSSCG00000029073	CACNB4	ENSSSCG00000055128	XLOC_081516
ENSSSCG00000037202	CACNG4	ENSSSCG00000055133	XLOC_081534
ENSSSCG00000036461	CACNG5	ENSSSCG00000055139	XLOC_081564
ENSSSCG00000032085	CACTIN	ENSSSCG00000055140	XLOC_081577
ENSSSCG00000038222	CACUL1	ENSSSCG00000055142	XLOC_081593
ENSSSCG00000015504	CACYBP	ENSSSCG00000055148	XLOC_081609
ENSSSCG00000028978	CAD	ENSSSCG00000055150	XLOC_081660
ENSSSCG00000031831	CADM1	ENSSSCG00000055175	XLOC_081684
ENSSSCG00000011999	CADM2	ENSSSCG00000055183	XLOC_081697
ENSSSCG00000006415	CADM3	ENSSSCG00000055189	XLOC_081717
ENSSSCG00000003061	CADM4	ENSSSCG00000055195	XLOC_081720
ENSSSCG00000016611	CADPS2	ENSSSCG00000055196	XLOC_081729
ENSSSCG00000038886	CAGE1	ENSSSCG00000055200	XLOC_081736
ENSSSCG00000006125	CALB1	ENSSSCG00000055209	XLOC_081743
ENSSSCG00000028481	CALCOCO1	ENSSSCG00000055210	XLOC_081756
ENSSSCG00000017543	CALCOCO2	ENSSSCG00000055215	XLOC_081770
ENSSSCG00000016031	CALCRL	ENSSSCG00000055222	XLOC_081778
ENSSSCG00000016535	CALD1	ENSSSCG00000055229	XLOC_081783
ENSSSCG00000010600	CALHM2	ENSSSCG00000055245	XLOC_081784
ENSSSCG00000031898	CALHM5	ENSSSCG00000055252	XLOC_081788
ENSSSCG00000036064	CALHM6	ENSSSCG00000055261	XLOC_081798
ENSSSCG00000025768	CALM1	ENSSSCG00000055262	XLOC_081812
ENSSSCG00000008433	CALM2	ENSSSCG00000055271	XLOC_081832
ENSSSCG00000022545	CALM3	ENSSSCG00000055275	XLOC_081860
ENSSSCG00000026517	CALML4	ENSSSCG00000055276	XLOC_081911
ENSSSCG00000011141	CALML5	ENSSSCG00000055280	XLOC_081916
ENSSSCG00000013746	CALR	ENSSSCG00000055281	XLOC_081928
ENSSSCG00000013858	CALR3	ENSSSCG00000055290	XLOC_081949
ENSSSCG00000016581	CALU	ENSSSCG00000055291	XLOC_081957
ENSSSCG00000034701	CALY	ENSSSCG00000055299	XLOC_081990
ENSSSCG00000011550	CAMK1	ENSSSCG00000055301	XLOC_082004
ENSSSCG00000011111	CAMK1D	ENSSSCG00000055303	XLOC_082013
ENSSSCG00000015619	CAMK1G	ENSSSCG00000055311	XLOC_082018
ENSSSCG00000014443	CAMK2A	ENSSSCG00000055316	XLOC_082035
ENSSSCG00000039535	CAMK2B	ENSSSCG00000055318	XLOC_082047
ENSSSCG00000009123	CAMK2D	ENSSSCG00000055319	XLOC_082048
ENSSSCG00000010311	CAMK2G	ENSSSCG00000055322	XLOC_082067
ENSSSCG00000024009	CAMK2N1	ENSSSCG00000055335	XLOC_082074
ENSSSCG00000053887	CAMK2N2	ENSSSCG00000055336	XLOC_082078
ENSSSCG00000037019	CAMK4	ENSSSCG00000055339	XLOC_082079
ENSSSCG00000017873	CAMKK1	ENSSSCG00000055341	XLOC_082086
ENSSSCG00000009815	CAMKK2	ENSSSCG00000055342	XLOC_082092
ENSSSCG00000008447	CAMKMT	ENSSSCG00000055343	XLOC_082118
ENSSSCG00000025416	CAMKV	ENSSSCG00000055353	XLOC_082139
ENSSSCG00000038955	CAMLG	ENSSSCG00000055354	XLOC_082154
ENSSSCG00000005753	CAMSAP1	ENSSSCG00000055355	XLOC_082162
ENSSSCG00000027314	CAMSAP2	ENSSSCG00000055359	XLOC_082187
ENSSSCG00000013583	CAMSAP3	ENSSSCG00000055364	XLOC_082191
ENSSSCG00000036772	CAMTA1	ENSSSCG00000055365	XLOC_082203
ENSSSCG00000017902	CAMTA2	ENSSSCG00000055367	XLOC_082210
ENSSSCG00000028869	CAND1	ENSSSCG00000055373	XLOC_082211
ENSSSCG00000011582	CAND2	ENSSSCG00000055374	XLOC_082220
ENSSSCG00000038130	CANT1	ENSSSCG00000055381	XLOC_082229
ENSSSCG00000014020	CANX	ENSSSCG00000055383	XLOC_082230
ENSSSCG00000003672	CAP1	ENSSSCG00000055385	XLOC_082243
ENSSSCG00000001068	CAP2	ENSSSCG00000055388	XLOC_082253
ENSSSCG00000008239	CAPG	ENSSSCG00000055398	XLOC_082258
ENSSSCG00000012999	CAPN1	ENSSSCG00000055407	XLOC_082262
ENSSSCG00000037779	CAPN10	ENSSSCG00000055408	XLOC_082264
ENSSSCG00000002967	CAPN12	ENSSSCG00000055422	XLOC_082266
ENSSSCG00000020986	CAPN13	ENSSSCG00000055435	XLOC_082267
ENSSSCG00000007993	CAPN15	ENSSSCG00000055438	XLOC_082281
ENSSSCG00000029411	CAPN2	ENSSSCG00000055440	XLOC_082282
ENSSSCG00000004728	CAPN3	ENSSSCG00000055443	XLOC_082285
ENSSSCG00000014875	CAPN5	ENSSSCG00000055457	XLOC_082288
ENSSSCG00000030697	CAPN7	ENSSSCG00000055462	XLOC_082306
ENSSSCG00000034746	CAPN8	ENSSSCG00000055463	XLOC_082312
ENSSSCG00000010182	CAPN9	ENSSSCG00000055467	XLOC_082314
ENSSSCG00000030149	CAPNS1	ENSSSCG00000055468	XLOC_082328
ENSSSCG00000013305	CAPRIN1	ENSSSCG00000055476	XLOC_082336
ENSSSCG00000022611	CAPRIN2	ENSSSCG00000055478	XLOC_082337
ENSSSCG00000013532	CAPS	ENSSSCG00000055479	XLOC_082341
ENSSSCG00000000517	CAPS2	ENSSSCG00000055480	XLOC_082349
ENSSSCG00000031959	CAPSL	ENSSSCG00000055499	XLOC_082351
ENSSSCG00000006775	CAPZA1	ENSSSCG00000055506	XLOC_082354
ENSSSCG00000028113	CAPZA2	ENSSSCG00000055509	XLOC_082360
ENSSSCG00000003493	CAPZB	ENSSSCG00000055525	XLOC_082368
ENSSSCG00000025260	CARD10	ENSSSCG00000055535	XLOC_082370
ENSSSCG00000034390	CARD11	ENSSSCG00000055540	XLOC_082374
ENSSSCG00000017154	CARD14	ENSSSCG00000055544	XLOC_082378
ENSSSCG00000008077	CARD19	ENSSSCG00000055549	XLOC_082384
ENSSSCG00000031715	CARD9	ENSSSCG00000055554	XLOC_082411
ENSSSCG00000016117	CARF	ENSSSCG00000055557	XLOC_082413
ENSSSCG00000026710	CARHSP1	ENSSSCG00000055560	XLOC_082441
ENSSSCG00000013633	CARM1	ENSSSCG00000055563	XLOC_082444
ENSSSCG00000001100	CARMIL1	ENSSSCG00000055564	XLOC_082461
ENSSSCG00000022722	CARMIL2	ENSSSCG00000055571	XLOC_082470
ENSSSCG00000002012	CARMIL3	ENSSSCG00000055574	XLOC_082490
ENSSSCG00000005271	CARNMT1	ENSSSCG00000055578	XLOC_082495
ENSSSCG00000012911	CARNS1	ENSSSCG00000055592	XLOC_082497
ENSSSCG00000012857	CARS1	ENSSSCG00000055593	XLOC_082536
ENSSSCG00000031757	CARS2	ENSSSCG00000055612	XLOC_082539
ENSSSCG00000016972	CARTPT	ENSSSCG00000055620	XLOC_082546
ENSSSCG00000017477	CASC3	ENSSSCG00000055622	XLOC_082564
ENSSSCG00000015327	CASD1	ENSSSCG00000055626	XLOC_082584
ENSSSCG00000012253	CASK	ENSSSCG00000055631	XLOC_082633
ENSSSCG00000033059	CASKIN1	ENSSSCG00000055632	XLOC_082648
ENSSSCG00000040578	CASKIN2	ENSSSCG00000055635	XLOC_082700
ENSSSCG00000026940	CASP10	ENSSSCG00000055636	XLOC_082725
ENSSSCG00000016464	CASP2	ENSSSCG00000055637	XLOC_082737
ENSSSCG00000034012	CASP3	ENSSSCG00000055638	XLOC_082744
ENSSSCG00000009140	CASP6	ENSSSCG00000055643	XLOC_082759
ENSSSCG00000032408	CASP7	ENSSSCG00000055652	XLOC_082762
ENSSSCG00000028157	CASP8	ENSSSCG00000055669	XLOC_082796
ENSSSCG00000004331	CASP8AP2	ENSSSCG00000055679	XLOC_082797
ENSSSCG00000003460	CASP9	ENSSSCG00000055680	XLOC_082800
ENSSSCG00000006390	CASQ1	ENSSSCG00000055692	XLOC_082818
ENSSSCG00000061647	CASQ2	ENSSSCG00000055703	XLOC_082819
ENSSSCG00000011878	CASR	ENSSSCG00000055716	XLOC_082822
ENSSSCG00000007495	CASS4	ENSSSCG00000055721	XLOC_082832
ENSSSCG00000014170	CAST	ENSSSCG00000055725	XLOC_082837
ENSSSCG00000009998	CASTOR1	ENSSSCG00000055737	XLOC_082841
ENSSSCG00000024045	CASTOR2	ENSSSCG00000055754	XLOC_082860
ENSSSCG00000003407	CASZ1	ENSSSCG00000055757	XLOC_082907
ENSSSCG00000013302	CAT	ENSSSCG00000055759	XLOC_082909
ENSSSCG00000016187	CATIP	ENSSSCG00000055760	XLOC_082946
ENSSSCG00000004701	CATSPER2	ENSSSCG00000055771	XLOC_082953
ENSSSCG00000002442	CATSPERB	ENSSSCG00000055774	XLOC_082995
ENSSSCG00000035850	CATSPERE	ENSSSCG00000055775	XLOC_083020
ENSSSCG00000002955	CATSPERG	ENSSSCG00000055780	XLOC_083025
ENSSSCG00000016634	CAV1	ENSSSCG00000055793	XLOC_083032
ENSSSCG00000016635	CAV2	ENSSSCG00000055796	XLOC_083037
ENSSSCG00000035446	CAVIN1	ENSSSCG00000055798	XLOC_083039
ENSSSCG00000026618	CAVIN2	ENSSSCG00000055802	XLOC_083083
ENSSSCG00000014633	CAVIN3	ENSSSCG00000055803	XLOC_083087
ENSSSCG00000037954	CAVIN4	ENSSSCG00000055806	XLOC_083123
ENSSSCG00000034339	CBARP	ENSSSCG00000055808	XLOC_083148
ENSSSCG00000027410	CBFA2T2	ENSSSCG00000055817	XLOC_083154
ENSSSCG00000002648	CBFA2T3	ENSSSCG00000055822	XLOC_083168
ENSSSCG00000033811	CBFB	ENSSSCG00000055823	XLOC_083173
ENSSSCG00000015115	CBL	ENSSSCG00000055825	XLOC_083177
ENSSSCG00000022486	CBLB	ENSSSCG00000055833	XLOC_083192
ENSSSCG00000003083	CBLC	ENSSSCG00000055834	XLOC_083204
ENSSSCG00000013117	CBLIF	ENSSSCG00000055842	XLOC_083229
ENSSSCG00000028585	CBLL1	ENSSSCG00000055844	XLOC_083233
ENSSSCG00000020859	CBLN2	ENSSSCG00000055845	XLOC_083235
ENSSSCG00000001985	CBLN3	ENSSSCG00000055848	XLOC_083246
ENSSSCG00000031851	CBR2	ENSSSCG00000055858	XLOC_083252
ENSSSCG00000012053	CBR3	ENSSSCG00000055860	XLOC_083272
ENSSSCG00000009717	CBR4	ENSSSCG00000055871	XLOC_083287
ENSSSCG00000040779	CBS	ENSSSCG00000055872	XLOC_083318
ENSSSCG00000017529	CBX1	ENSSSCG00000055883	XLOC_083335
ENSSSCG00000024261	CBX2	ENSSSCG00000055888	XLOC_083355
ENSSSCG00000016711	CBX3	ENSSSCG00000055896	XLOC_083380
ENSSSCG00000017160	CBX4	ENSSSCG00000055898	XLOC_083381
ENSSSCG00000039191	CBX5	ENSSSCG00000055899	XLOC_083414
ENSSSCG00000040334	CBX6	ENSSSCG00000055900	XLOC_083416
ENSSSCG00000060236	CBX7	ENSSSCG00000055910	XLOC_083423
ENSSSCG00000034146	CBX8	ENSSSCG00000055920	XLOC_083424
ENSSSCG00000013761	CC2D1A	ENSSSCG00000055921	XLOC_083425
ENSSSCG00000003862	CC2D1B	ENSSSCG00000055922	XLOC_083428
ENSSSCG00000008738	CC2D2A	ENSSSCG00000055923	XLOC_083431
ENSSSCG00000046471	CC2D2B	ENSSSCG00000055926	XLOC_083439
ENSSSCG00000010243	CCAR1	ENSSSCG00000055934	XLOC_083462
ENSSSCG00000009628	CCAR2	ENSSSCG00000055937	XLOC_083480
ENSSSCG00000004907	CCBE1	ENSSSCG00000055948	XLOC_083486
ENSSSCG00000028723	CCDC102A	ENSSSCG00000055951	XLOC_083507
ENSSSCG00000035081	CCDC106	ENSSSCG00000055959	XLOC_083512
ENSSSCG00000005313	CCDC107	ENSSSCG00000055966	XLOC_083514
ENSSSCG00000029866	CCDC112	ENSSSCG00000055970	XLOC_083528
ENSSSCG00000035628	CCDC115	ENSSSCG00000055977	XLOC_083546
ENSSSCG00000032261	CCDC117	ENSSSCG00000055978	XLOC_083547
ENSSSCG00000011329	CCDC12	ENSSSCG00000055979	XLOC_083549
ENSSSCG00000012288	CCDC120	ENSSSCG00000055985	XLOC_083552
ENSSSCG00000009426	CCDC122	ENSSSCG00000055986	XLOC_083553
ENSSSCG00000013891	CCDC124	ENSSSCG00000055988	XLOC_083577
ENSSSCG00000016963	CCDC125	ENSSSCG00000056000	XLOC_083590
ENSSSCG00000029174	CCDC126	ENSSSCG00000056008	XLOC_083593
ENSSSCG00000036783	CCDC127	ENSSSCG00000056009	XLOC_083596
ENSSSCG00000035565	CCDC134	ENSSSCG00000056010	XLOC_083599
ENSSSCG00000016579	CCDC136	ENSSSCG00000056014	XLOC_083601
ENSSSCG00000034716	CCDC137	ENSSSCG00000056017	XLOC_083612
ENSSSCG00000008135	CCDC138	ENSSSCG00000056019	XLOC_083625
ENSSSCG00000025349	CCDC14	ENSSSCG00000056023	XLOC_083630
ENSSSCG00000016002	CCDC141	ENSSSCG00000056033	XLOC_083638
ENSSSCG00000008270	CCDC142	ENSSSCG00000056037	XLOC_083653
ENSSSCG00000015412	CCDC146	ENSSSCG00000056039	XLOC_083679
ENSSSCG00000023001	CCDC149	ENSSSCG00000056044	XLOC_083684
ENSSSCG00000015206	CCDC15	ENSSSCG00000056045	XLOC_083685
ENSSSCG00000016069	CCDC150	ENSSSCG00000056049	XLOC_083698
ENSSSCG00000016867	CCDC152	ENSSSCG00000056054	XLOC_096413
ENSSSCG00000051840	CCDC153	ENSSSCG00000056070	XLOC_096418
ENSSSCG00000008983	CCDC158	ENSSSCG00000056074	XLOC_096421
ENSSSCG00000013620	CCDC159	ENSSSCG00000056077	XLOC_096425
ENSSSCG00000031011	CCDC160	ENSSSCG00000056080	XLOC_096426
ENSSSCG00000036178	CCDC167	ENSSSCG00000056082	XLOC_096448
ENSSSCG00000004087	CCDC170	ENSSSCG00000056093	XLOC_096458
ENSSSCG00000005182	CCDC171	ENSSSCG00000056102	XLOC_096469
ENSSSCG00000040702	CCDC174	ENSSSCG00000056103	XLOC_096522
ENSSSCG00000006897	CCDC18	ENSSSCG00000056105	XLOC_096541
ENSSSCG00000045508	CCDC180	ENSSSCG00000056112	XLOC_096558
ENSSSCG00000028804	CCDC181	ENSSSCG00000056117	XLOC_096560
ENSSSCG00000010648	CCDC186	ENSSSCG00000056123	XLOC_096562
ENSSSCG00000011913	CCDC191	ENSSSCG00000056124	XLOC_096565
ENSSSCG00000041467	CCDC194	ENSSSCG00000056129	XLOC_096566
ENSSSCG00000005067	CCDC198	ENSSSCG00000056139	XLOC_096593
ENSSSCG00000012297	CCDC22	ENSSSCG00000056147	XLOC_096609
ENSSSCG00000034727	CCDC24	ENSSSCG00000056149	XLOC_096617
ENSSSCG00000024972	CCDC25	ENSSSCG00000056151	XLOC_096625
ENSSSCG00000004148	CCDC28A	ENSSSCG00000056152	XLOC_096629
ENSSSCG00000031514	CCDC28B	ENSSSCG00000056155	XLOC_096652
ENSSSCG00000011110	CCDC3	ENSSSCG00000056158	XLOC_096664
ENSSSCG00000038033	CCDC32	ENSSSCG00000056161	XLOC_096681
ENSSSCG00000013336	CCDC34	ENSSSCG00000056176	XLOC_096712
ENSSSCG00000000894	CCDC38	ENSSSCG00000056178	XLOC_096780
ENSSSCG00000011768	CCDC39	ENSSSCG00000056181	XLOC_096820
ENSSSCG00000017352	CCDC43	ENSSSCG00000056184	XLOC_096831
ENSSSCG00000028698	CCDC47	ENSSSCG00000056187	XLOC_096837
ENSSSCG00000036423	CCDC50	ENSSSCG00000056188	XLOC_096840
ENSSSCG00000011350	CCDC51	ENSSSCG00000056212	XLOC_096848
ENSSSCG00000029553	CCDC57	ENSSSCG00000056226	XLOC_096853
ENSSSCG00000038987	CCDC59	ENSSSCG00000056227	XLOC_096854
ENSSSCG00000010211	CCDC6	ENSSSCG00000056228	XLOC_096872
ENSSSCG00000009842	CCDC60	ENSSSCG00000056234	XLOC_096878
ENSSSCG00000003100	CCDC61	ENSSSCG00000056235	XLOC_096908
ENSSSCG00000009787	CCDC62	ENSSSCG00000056236	XLOC_096921
ENSSSCG00000000179	CCDC65	ENSSSCG00000056241	XLOC_096924
ENSSSCG00000021439	CCDC66	ENSSSCG00000056244	XLOC_096941
ENSSSCG00000004534	CCDC68	ENSSSCG00000056245	XLOC_096947
ENSSSCG00000040411	CCDC69	ENSSSCG00000056248	XLOC_096952
ENSSSCG00000011378	CCDC71	ENSSSCG00000056253	XLOC_096964
ENSSSCG00000059202	CCDC71L	ENSSSCG00000056254	XLOC_096978
ENSSSCG00000026433	CCDC73	ENSSSCG00000056258	XLOC_096983
ENSSSCG00000000751	CCDC77	ENSSSCG00000056261	XLOC_097012
ENSSSCG00000050615	CCDC78	ENSSSCG00000056264	XLOC_097020
ENSSSCG00000033830	CCDC8	ENSSSCG00000056281	XLOC_097063
ENSSSCG00000011928	CCDC80	ENSSSCG00000056286	XLOC_097084
ENSSSCG00000014917	CCDC81	ENSSSCG00000056290	XLOC_097092
ENSSSCG00000014972	CCDC82	ENSSSCG00000056297	XLOC_097093
ENSSSCG00000014912	CCDC83	ENSSSCG00000056299	XLOC_097097
ENSSSCG00000008396	CCDC85A	ENSSSCG00000056301	XLOC_097121
ENSSSCG00000012968	CCDC85B	ENSSSCG00000056318	XLOC_097135
ENSSSCG00000037284	CCDC85C	ENSSSCG00000056319	XLOC_097161
ENSSSCG00000013105	CCDC86	ENSSSCG00000056332	XLOC_097244
ENSSSCG00000008406	CCDC88A	ENSSSCG00000056333	XLOC_097256
ENSSSCG00000002440	CCDC88C	ENSSSCG00000056353	XLOC_097304
ENSSSCG00000062997	CCDC89	ENSSSCG00000056356	XLOC_097325
ENSSSCG00000024240	CCDC9	ENSSSCG00000056358	XLOC_097326
ENSSSCG00000014903	CCDC90B	ENSSSCG00000056370	XLOC_097339
ENSSSCG00000024232	CCDC91	ENSSSCG00000056373	XLOC_097340
ENSSSCG00000009764	CCDC92	ENSSSCG00000056395	XLOC_097360
ENSSSCG00000015714	CCDC93	ENSSSCG00000056401	XLOC_097361
ENSSSCG00000003016	CCDC97	ENSSSCG00000056402	XLOC_097370
ENSSSCG00000023975	CCDC9B	ENSSSCG00000056408	XLOC_097380
ENSSSCG00000047060	CCER2	ENSSSCG00000056411	XLOC_097396
ENSSSCG00000001391	CCHCR1	ENSSSCG00000056412	XLOC_097404
ENSSSCG00000011277	CCK	ENSSSCG00000056416	XLOC_097449
ENSSSCG00000061661	CCKAR	ENSSSCG00000056426	XLOC_097458
ENSSSCG00000044762	CCL11	ENSSSCG00000056429	XLOC_097469
ENSSSCG00000034722	CCL14	ENSSSCG00000056431	XLOC_097485
ENSSSCG00000040940	CCL16	ENSSSCG00000056433	XLOC_097521
ENSSSCG00000023852	CCL17	ENSSSCG00000056434	XLOC_097537
ENSSSCG00000010966	CCL19	ENSSSCG00000056436	XLOC_097539
ENSSSCG00000017723	CCL2	ENSSSCG00000056437	XLOC_097566
ENSSSCG00000038162	CCL21	ENSSSCG00000056448	XLOC_097657
ENSSSCG00000056251	CCL22	ENSSSCG00000056449	XLOC_097659
ENSSSCG00000013593	CCL25	ENSSSCG00000056450	XLOC_097664
ENSSSCG00000039874	CCL26	ENSSSCG00000056456	XLOC_097690
ENSSSCG00000010967	CCL27	ENSSSCG00000056458	XLOC_097692
ENSSSCG00000016871	CCL28	ENSSSCG00000056460	XLOC_097726
ENSSSCG00000032343	CCL4	ENSSSCG00000056467	XLOC_097747
ENSSSCG00000017705	CCL5	ENSSSCG00000056484	XLOC_097767
ENSSSCG00000040648	CCL8	ENSSSCG00000056486	XLOC_097778
ENSSSCG00000016734	CCM2	ENSSSCG00000056493	XLOC_097781
ENSSSCG00000007239	CCM2L	ENSSSCG00000056498	XLOC_097813
ENSSSCG00000006940	CCN1	ENSSSCG00000056523	XLOC_097814
ENSSSCG00000004192	CCN2	ENSSSCG00000056526	XLOC_097829
ENSSSCG00000006002	CCN3	ENSSSCG00000056527	XLOC_097850
ENSSSCG00000005946	CCN4	ENSSSCG00000056539	XLOC_097856
ENSSSCG00000004422	CCN6	ENSSSCG00000056542	XLOC_097868
ENSSSCG00000060144	CCNA2	ENSSSCG00000056563	XLOC_097869
ENSSSCG00000029326	CCNB1	ENSSSCG00000056574	XLOC_097886
ENSSSCG00000002144	CCNB1IP1	ENSSSCG00000056577	XLOC_097924
ENSSSCG00000004588	CCNB2	ENSSSCG00000056579	XLOC_097939
ENSSSCG00000012307	CCNB3	ENSSSCG00000056586	XLOC_097947
ENSSSCG00000004353	CCNC	ENSSSCG00000056588	XLOC_097950
ENSSSCG00000037900	CCND1	ENSSSCG00000056596	XLOC_097974
ENSSSCG00000038694	CCND2	ENSSSCG00000056598	XLOC_097998
ENSSSCG00000032284	CCND3	ENSSSCG00000056605	XLOC_098000
ENSSSCG00000034771	CCNDBP1	ENSSSCG00000056608	XLOC_098004
ENSSSCG00000006095	CCNE2	ENSSSCG00000056609	XLOC_098018
ENSSSCG00000026326	CCNF	ENSSSCG00000056611	XLOC_098026
ENSSSCG00000017024	CCNG1	ENSSSCG00000056613	XLOC_098031
ENSSSCG00000008988	CCNG2	ENSSSCG00000056618	XLOC_098038
ENSSSCG00000014147	CCNH	ENSSSCG00000056621	XLOC_098039
ENSSSCG00000008987	CCNI	ENSSSCG00000056628	XLOC_098041
ENSSSCG00000010502	CCNJ	ENSSSCG00000056630	XLOC_098044
ENSSSCG00000017036	CCNJL	ENSSSCG00000056632	XLOC_098069
ENSSSCG00000002509	CCNK	ENSSSCG00000056638	XLOC_098070
ENSSSCG00000029352	CCNL1	ENSSSCG00000056642	XLOC_098082
ENSSSCG00000003354	CCNL2	ENSSSCG00000056644	XLOC_098083
ENSSSCG00000012770	CCNQ	ENSSSCG00000056645	XLOC_098089
ENSSSCG00000038181	CCNT1	ENSSSCG00000056647	XLOC_098090
ENSSSCG00000015697	CCNT2	ENSSSCG00000056657	XLOC_098100
ENSSSCG00000011107	CCNY	ENSSSCG00000056660	XLOC_098104
ENSSSCG00000024696	CCNYL1	ENSSSCG00000056662	XLOC_098124
ENSSSCG00000023829	CCP110	ENSSSCG00000056663	XLOC_098126
ENSSSCG00000004610	CCPG1	ENSSSCG00000056681	XLOC_098133
ENSSSCG00000011322	CCR1	ENSSSCG00000056686	XLOC_098135
ENSSSCG00000024311	CCR2	ENSSSCG00000056694	XLOC_098138
ENSSSCG00000034660	CCR4	ENSSSCG00000056698	XLOC_098140
ENSSSCG00000024344	CCR5	ENSSSCG00000056702	XLOC_098141
ENSSSCG00000024562	CCR6	ENSSSCG00000056705	XLOC_098143
ENSSSCG00000017466	CCR7	ENSSSCG00000056710	XLOC_098144
ENSSSCG00000011316	CCR9	ENSSSCG00000056714	XLOC_098161
ENSSSCG00000023557	CCRL2	ENSSSCG00000056717	XLOC_098186
ENSSSCG00000012934	CCS	ENSSSCG00000056719	XLOC_098211
ENSSSCG00000023776	CCSAP	ENSSSCG00000056721	XLOC_098215
ENSSSCG00000022986	CCSER1	ENSSSCG00000056724	XLOC_098218
ENSSSCG00000010351	CCSER2	ENSSSCG00000056732	XLOC_098242
ENSSSCG00000000496	CCT2	ENSSSCG00000056735	XLOC_098243
ENSSSCG00000006487	CCT3	ENSSSCG00000056744	XLOC_098246
ENSSSCG00000008377	CCT4	ENSSSCG00000056747	XLOC_098307
ENSSSCG00000024126	CCT5	ENSSSCG00000056748	XLOC_098314
ENSSSCG00000022196	CCT6B	ENSSSCG00000056754	XLOC_098350
ENSSSCG00000008303	CCT7	ENSSSCG00000056755	XLOC_098366
ENSSSCG00000026761	CCT8	ENSSSCG00000056757	XLOC_098393
ENSSSCG00000006734	CD101	ENSSSCG00000056760	XLOC_098398
ENSSSCG00000004485	CD109	ENSSSCG00000056762	XLOC_098399
ENSSSCG00000014369	CD14	ENSSSCG00000056763	XLOC_098439
ENSSSCG00000012840	CD151	ENSSSCG00000056764	XLOC_098456
ENSSSCG00000033146	CD163	ENSSSCG00000056766	XLOC_098462
ENSSSCG00000004414	CD164	ENSSSCG00000056768	XLOC_098466
ENSSSCG00000003051	CD177	ENSSSCG00000056772	XLOC_098548
ENSSSCG00000016957	CD180	ENSSSCG00000056774	XLOC_098587
ENSSSCG00000006452	CD1B	ENSSSCG00000056778	XLOC_098598
ENSSSCG00000058723	CD1D	ENSSSCG00000056783	XLOC_098607
ENSSSCG00000006450	CD1E	ENSSSCG00000056785	XLOC_098618
ENSSSCG00000006736	CD2	ENSSSCG00000056792	XLOC_098624
ENSSSCG00000027820	CD200	ENSSSCG00000056793	XLOC_098640
ENSSSCG00000013579	CD209	ENSSSCG00000056794	XLOC_098651
ENSSSCG00000002893	CD22	ENSSSCG00000056800	XLOC_098657
ENSSSCG00000038398	CD226	ENSSSCG00000056803	XLOC_098673
ENSSSCG00000056379	CD24	ENSSSCG00000056812	XLOC_098723
ENSSSCG00000006374	CD244	ENSSSCG00000056827	XLOC_098728
ENSSSCG00000006309	CD247	ENSSSCG00000056835	XLOC_098734
ENSSSCG00000029949	CD248	ENSSSCG00000056836	XLOC_098793
ENSSSCG00000063084	CD27	ENSSSCG00000056837	XLOC_098805
ENSSSCG00000005211	CD274	ENSSSCG00000056843	XLOC_098855
ENSSSCG00000028561	CD28	ENSSSCG00000056845	XLOC_098858
ENSSSCG00000030197	CD2AP	ENSSSCG00000056847	XLOC_098867
ENSSSCG00000007791	CD2BP2	ENSSSCG00000056848	XLOC_098935
ENSSSCG00000017236	CD300C	ENSSSCG00000056849	XLOC_098937
ENSSSCG00000036050	CD302	ENSSSCG00000056854	XLOC_098951
ENSSSCG00000032833	CD320	ENSSSCG00000056855	XLOC_098960
ENSSSCG00000039946	CD34	ENSSSCG00000056891	XLOC_098961
ENSSSCG00000033849	CD37	ENSSSCG00000056895	XLOC_098966
ENSSSCG00000015093	CD3D	ENSSSCG00000056909	XLOC_098977
ENSSSCG00000040140	CD3E	ENSSSCG00000056912	XLOC_098985
ENSSSCG00000000687	CD4	ENSSSCG00000056914	XLOC_098989
ENSSSCG00000035078	CD40	ENSSSCG00000056917	XLOC_098994
ENSSSCG00000030172	CD40LG	ENSSSCG00000056918	XLOC_099001
ENSSSCG00000013297	CD44	ENSSSCG00000056925	XLOC_099003
ENSSSCG00000011942	CD47	ENSSSCG00000056926	XLOC_099013
ENSSSCG00000006379	CD48	ENSSSCG00000056927	XLOC_099021
ENSSSCG00000013115	CD5	ENSSSCG00000056948	XLOC_099023
ENSSSCG00000057268	CD52	ENSSSCG00000056958	XLOC_099026
ENSSSCG00000006800	CD53	ENSSSCG00000056964	XLOC_099033
ENSSSCG00000013111	CD6	ENSSSCG00000056966	XLOC_099073
ENSSSCG00000000361	CD63	ENSSSCG00000056988	XLOC_099123
ENSSSCG00000000653	CD69	ENSSSCG00000057006	XLOC_099125
ENSSSCG00000005311	CD72	ENSSSCG00000057035	XLOC_099236
ENSSSCG00000033262	CD74	ENSSSCG00000057037	XLOC_099246
ENSSSCG00000033684	CD79A	ENSSSCG00000057040	XLOC_099259
ENSSSCG00000017283	CD79B	ENSSSCG00000057059	XLOC_099276
ENSSSCG00000011899	CD80	ENSSSCG00000057060	XLOC_099321
ENSSSCG00000039243	CD81	ENSSSCG00000057062	XLOC_099329
ENSSSCG00000029521	CD82	ENSSSCG00000057066	XLOC_099349
ENSSSCG00000021576	CD83	ENSSSCG00000057076	XLOC_099388
ENSSSCG00000006381	CD84	ENSSSCG00000057083	XLOC_099395
ENSSSCG00000011877	CD86	ENSSSCG00000057091	XLOC_099408
ENSSSCG00000008217	CD8A	ENSSSCG00000057093	XLOC_099410
ENSSSCG00000022230	CD9	ENSSSCG00000057097	XLOC_099417
ENSSSCG00000007116	CD93	ENSSSCG00000057099	XLOC_099418
ENSSSCG00000023993	CD96	ENSSSCG00000057104	XLOC_099419
ENSSSCG00000012744	CD99L2	ENSSSCG00000057109	XLOC_099435
ENSSSCG00000021259	CDA	ENSSSCG00000057126	XLOC_099464
ENSSSCG00000031598	CDADC1	ENSSSCG00000057133	XLOC_099493
ENSSSCG00000004719	CDAN1	ENSSSCG00000057135	XLOC_099497
ENSSSCG00000011112	CDC123	ENSSSCG00000057139	XLOC_099499
ENSSSCG00000006864	CDC14A	ENSSSCG00000057146	XLOC_099508
ENSSSCG00000020899	CDC16	ENSSSCG00000057171	XLOC_099524
ENSSSCG00000003949	CDC20	ENSSSCG00000057172	XLOC_099577
ENSSSCG00000014325	CDC23	ENSSSCG00000057179	XLOC_099583
ENSSSCG00000021494	CDC25A	ENSSSCG00000057189	XLOC_099585
ENSSSCG00000007151	CDC25B	ENSSSCG00000057191	XLOC_099637
ENSSSCG00000051455	CDC25C	ENSSSCG00000057194	XLOC_099648
ENSSSCG00000033177	CDC26	ENSSSCG00000057195	XLOC_099682
ENSSSCG00000017308	CDC27	ENSSSCG00000057201	XLOC_099688
ENSSSCG00000039640	CDC34	ENSSSCG00000057202	XLOC_099694
ENSSSCG00000013647	CDC37	ENSSSCG00000057206	XLOC_099709
ENSSSCG00000005219	CDC37L1	ENSSSCG00000057216	XLOC_099730
ENSSSCG00000004403	CDC40	ENSSSCG00000057221	XLOC_099732
ENSSSCG00000003520	CDC42	ENSSSCG00000057224	XLOC_099733
ENSSSCG00000010862	CDC42BPA	ENSSSCG00000057225	XLOC_099737
ENSSSCG00000002523	CDC42BPB	ENSSSCG00000057227	XLOC_099759
ENSSSCG00000013018	CDC42BPG	ENSSSCG00000057230	XLOC_099774
ENSSSCG00000026108	CDC42EP1	ENSSSCG00000057231	XLOC_099777
ENSSSCG00000012996	CDC42EP2	ENSSSCG00000057235	XLOC_099781
ENSSSCG00000021359	CDC42EP3	ENSSSCG00000057242	XLOC_099786
ENSSSCG00000017245	CDC42EP4	ENSSSCG00000057243	XLOC_099794
ENSSSCG00000039922	CDC42EP5	ENSSSCG00000057245	XLOC_099797
ENSSSCG00000031881	CDC42SE1	ENSSSCG00000057249	XLOC_099804
ENSSSCG00000036686	CDC42SE2	ENSSSCG00000057277	XLOC_099809
ENSSSCG00000010122	CDC45	ENSSSCG00000057278	XLOC_099810
ENSSSCG00000001708	CDC5L	ENSSSCG00000057280	XLOC_099820
ENSSSCG00000017471	CDC6	ENSSSCG00000057293	XLOC_099833
ENSSSCG00000027251	CDC7	ENSSSCG00000057305	XLOC_099835
ENSSSCG00000010801	CDC73	ENSSSCG00000057310	XLOC_099836
ENSSSCG00000009653	CDCA2	ENSSSCG00000057312	XLOC_099838
ENSSSCG00000000683	CDCA3	ENSSSCG00000057317	XLOC_099843
ENSSSCG00000002559	CDCA4	ENSSSCG00000057318	XLOC_099844
ENSSSCG00000013008	CDCA5	ENSSSCG00000057323	XLOC_099856
ENSSSCG00000015961	CDCA7	ENSSSCG00000057327	XLOC_099857
ENSSSCG00000015380	CDCA7L	ENSSSCG00000057329	XLOC_099861
ENSSSCG00000032909	CDCA8	ENSSSCG00000057330	XLOC_099864
ENSSSCG00000011298	CDCP1	ENSSSCG00000057335	XLOC_099865
ENSSSCG00000030538	CDCP2	ENSSSCG00000057336	XLOC_099867
ENSSSCG00000025652	CDH1	ENSSSCG00000057340	XLOC_099878
ENSSSCG00000016802	CDH10	ENSSSCG00000057351	XLOC_099902
ENSSSCG00000002795	CDH11	ENSSSCG00000057368	XLOC_099903
ENSSSCG00000016799	CDH12	ENSSSCG00000057369	XLOC_099917
ENSSSCG00000002684	CDH13	ENSSSCG00000057376	XLOC_099918
ENSSSCG00000022721	CDH16	ENSSSCG00000057382	XLOC_111328
ENSSSCG00000006106	CDH17	ENSSSCG00000057383	XLOC_111335
ENSSSCG00000026842	CDH18	ENSSSCG00000057387	XLOC_111360
ENSSSCG00000004885	CDH19	ENSSSCG00000057390	XLOC_111366
ENSSSCG00000003722	CDH2	ENSSSCG00000057391	XLOC_111374
ENSSSCG00000007439	CDH22	ENSSSCG00000057394	XLOC_111382
ENSSSCG00000002037	CDH24	ENSSSCG00000057397	XLOC_111384
ENSSSCG00000023162	CDH3	ENSSSCG00000057404	XLOC_111392
ENSSSCG00000025784	CDH4	ENSSSCG00000057414	XLOC_111422
ENSSSCG00000035772	CDH5	ENSSSCG00000057420	XLOC_111467
ENSSSCG00000032931	CDH6	ENSSSCG00000057423	XLOC_111481
ENSSSCG00000014055	CDHR2	ENSSSCG00000057431	XLOC_111502
ENSSSCG00000015433	CDHR3	ENSSSCG00000057435	XLOC_111507
ENSSSCG00000011391	CDHR4	ENSSSCG00000057438	XLOC_111517
ENSSSCG00000012852	CDHR5	ENSSSCG00000057453	XLOC_111519
ENSSSCG00000026900	CDIN1	ENSSSCG00000057454	XLOC_111522
ENSSSCG00000007941	CDIP1	ENSSSCG00000057457	XLOC_111529
ENSSSCG00000027629	CDIPT	ENSSSCG00000057459	XLOC_111560
ENSSSCG00000010214	CDK1	ENSSSCG00000057463	XLOC_111569
ENSSSCG00000025401	CDK10	ENSSSCG00000057468	XLOC_111586
ENSSSCG00000017504	CDK12	ENSSSCG00000057478	XLOC_111607
ENSSSCG00000016769	CDK13	ENSSSCG00000057487	XLOC_111616
ENSSSCG00000015307	CDK14	ENSSSCG00000057488	XLOC_111617
ENSSSCG00000022296	CDK15	ENSSSCG00000057490	XLOC_111623
ENSSSCG00000012269	CDK16	ENSSSCG00000057493	XLOC_111637
ENSSSCG00000028182	CDK17	ENSSSCG00000057494	XLOC_111643
ENSSSCG00000015290	CDK18	ENSSSCG00000057495	XLOC_111650
ENSSSCG00000037424	CDK19	ENSSSCG00000057496	XLOC_111658
ENSSSCG00000037597	CDK2	ENSSSCG00000057504	XLOC_111703
[truncated: 14,157 more rows]
