# Supplementary material for: Transcriptomics yields valuable information regarding the response mechanisms of Chinese Min pigs infected with PEDV
Source: Frontiers journal article supplement (doi:10.3389/fvets.2023.1295723), 2023-12-11
Supplement: Table_4.xlsx [file Table_4.xlsx]

## Sheet: Sheet1
Table S4 Relationship pairs in ceRNA networks
miRNA	Target
1_1723	SLC1A2
1_1799	RRAGD
1_1799	RBKS
13_34470	SLC66A1
17_42222	TSPAN11
2_5283	GALK2
2_5283	PSME1
2_5283	SUCLA2
2_5283	POLD4
2_5283	RIMS4
2_6371	CYBRD1
2_6795	CYFIP2
2_6795	ENSSSCG00000038594
2_6795	TGM2
2_6795	PIK3R5
3_8542	TNFSF8
5_15386	BCL6
5_15386	GNAT1
5_15386	PIK3R5
6_17895	ABLIM1
6_17895	CALML4
6_17895	DPP4
6_17895	PAFAH2
6_17895	FBXO6
6_17895	C1orf115
6_17895	ENSSSCG00000032067
6_17895	ENSSSCG00000020837
6_17895	MEA1
6_17895	RBKS
7_21495	OLFML3
7_21495	BCCIP
AEMK02000452.1_45917	MLLT3
AEMK02000682.1_46332	ALDOB
ssc-let-7a	TFPI
ssc-let-7a	RIDA
ssc-let-7a	SLC25A27
ssc-let-7d-5p	RIDA
ssc-let-7d-5p	SLC25A27
ssc-let-7f-5p	TFPI
ssc-let-7f-5p	C2orf69
ssc-let-7f-5p	ZNF879
ssc-let-7g	COX7C
ssc-let-7g	TFPI
ssc-miR-10391	TSPAN5
ssc-miR-10391	MSI2
ssc-miR-125a	ENSSSCG00000008990
ssc-miR-130b-5p	TLR6
ssc-miR-130b-5p	OR51E1
ssc-miR-143-3p	SLC25A15
ssc-miR-143-3p	SLC4A4
ssc-miR-183	DAB1
ssc-miR-185	GOSR1
ssc-miR-185	ENSSSCG00000016902
ssc-miR-185	PEX19
ssc-miR-185	CS
ssc-miR-185	TAF7
ssc-miR-185	ZMAT2
ssc-miR-185	EDA
ssc-miR-185	CXCL14
ssc-miR-185	CHPF
ssc-miR-185	VIPR1
ssc-miR-185	ENSSSCG00000017608
ssc-miR-185	FAIM2
ssc-miR-185	PHKB
ssc-miR-185	PCP4L1
ssc-miR-194a-3p	TP53INP2
ssc-miR-194a-3p	GNS
ssc-miR-194a-5p	UBA5
ssc-miR-194b-3p	ENSSSCG00000043115
ssc-miR-194b-5p	UBA5
ssc-miR-224	ROBO2
ssc-miR-2320-5p	EMC2
ssc-miR-2320-5p	ZNF592
ssc-miR-2366	EIF4E2
ssc-miR-24-3p	GRHPR
ssc-miR-26b-3p	BOK
ssc-miR-28-5p	ENSSSCG00000046588
ssc-miR-30b-3p	CTSC
ssc-miR-31	KLHL3
ssc-miR-324	APOLD1
ssc-miR-328	DNAJB1
ssc-miR-330	SLC22A3
ssc-miR-339	GPR183
ssc-miR-339	PIK3R5
ssc-miR-339-5p	GPR183
ssc-miR-339-5p	PIK3R5
ssc-miR-342	RPS6KA1
ssc-miR-361-3p	MEGF9
ssc-miR-361-3p	NR3C1
ssc-miR-361-3p	ENSSSCG00000029199
ssc-miR-361-3p	CTSC
ssc-miR-361-3p	VAMP5
ssc-miR-361-3p	GNS
ssc-miR-361-3p	RAB42
ssc-miR-423-5p	C16orf74
ssc-miR-423-5p	TMEM184A
ssc-miR-4334-3p	PIK3R5
ssc-miR-503	SLC12A6
ssc-miR-503	MOCS2
ssc-miR-532-3p	GALNT10
ssc-miR-532-3p	PGLYRP4
ssc-miR-7144-5p	PRSS35
ssc-miR-7144-5p	RGS10
ssc-miR-769-3p	COQ9
ssc-miR-769-3p	HLA-DRA
ssc-miR-874	ENSSSCG00000034739
ssc-miR-874	RBKS
ssc-miR-874	P3H2
ssc-miR-874	GALNT10
ssc-miR-874	RENBP
ssc-miR-98	ZNF322
ssc-miR-98	TFPI
ssc-miR-98	RIDA
X_44574	SCN3B
1_1723	ENSSSCG00000041050
1_1723	XLOC_200316
1_1723	XLOC_185040
1_1723	XLOC_079860
1_1723	XLOC_137882
1_1723	XLOC_153727
1_1723	XLOC_220906
1_1723	ENSSSCG00000042107
1_1723	XLOC_170702
1_1723	ENSSSCG00000042468
1_1723	XLOC_032072
1_1723	XLOC_079660
1_1723	XLOC_172140
1_1723	XLOC_186014
1_1723	XLOC_049754
1_1723	XLOC_058647
1_1723	ENSSSCG00000061698
1_1723	ENSSSCG00000052729
1_1723	XLOC_006788
1_1723	ENSSSCG00000055934
1_1723	XLOC_154898
1_1723	XLOC_098104
1_1723	XLOC_250555
1_1723	ENSSSCG00000061578
1_1799	ENSSSCG00000059956
1_1799	ENSSSCG00000059385
1_1799	ENSSSCG00000039561
1_1799	XLOC_203555
1_1799	ENSSSCG00000049325
1_1799	ENSSSCG00000049464
1_1799	ENSSSCG00000053183
13_34470	ENSSSCG00000049539
17_42222	ENSSSCG00000043447
17_42222	XLOC_128555
2_5283	ENSSSCG00000043271
2_5283	ENSSSCG00000039561
2_6371	ENSSSCG00000041180
2_6795	ENSSSCG00000041050
2_6795	ENSSSCG00000060353
2_6795	XLOC_112799
2_6795	XLOC_235119
2_6795	ENSSSCG00000042107
3_8542	ENSSSCG00000048264
3_8542	XLOC_234730
5_15386	ENSSSCG00000041050
5_15386	XLOC_040655
5_15386	ENSSSCG00000056717
5_15386	XLOC_079860
5_15386	XLOC_185040
5_15386	ENSSSCG00000052729
5_15386	XLOC_203311
5_15386	ENSSSCG00000059392
5_15386	XLOC_137882
5_15386	XLOC_079810
5_15386	XLOC_138354
5_15386	ENSSSCG00000054445
5_15386	XLOC_201694
5_15386	XLOC_186679
5_15386	XLOC_199203
5_15386	XLOC_059344
5_15386	XLOC_059650
5_15386	ENSSSCG00000057738
5_15386	XLOC_234716
5_15386	ENSSSCG00000044428
5_15386	XLOC_153325
5_15386	XLOC_128620
5_15386	XLOC_120795
5_15386	XLOC_200936
5_15386	XLOC_112799
5_15386	XLOC_186731
5_15386	XLOC_040515
6_17895	ENSSSCG00000044318
6_17895	ENSSSCG00000041180
6_17895	ENSSSCG00000049539
6_17895	ENSSSCG00000049325
6_17895	ENSSSCG00000059956
7_21495	ENSSSCG00000058289
7_21495	ENSSSCG00000048122
AEMK02000452.1_45917	ENSSSCG00000048122
AEMK02000452.1_45917	ENSSSCG00000055571
AEMK02000682.1_46332	ENSSSCG00000049683
ssc-let-7a	ENSSSCG00000049539
ssc-let-7d-5p	ENSSSCG00000049539
ssc-let-7d-5p	ENSSSCG00000051325
ssc-let-7f-5p	ENSSSCG00000049539
ssc-let-7f-5p	ENSSSCG00000051325
ssc-let-7g	ENSSSCG00000058289
ssc-let-7g	ENSSSCG00000049539
ssc-miR-10391	ENSSSCG00000041050
ssc-miR-10391	ENSSSCG00000042468
ssc-miR-10391	XLOC_112799
ssc-miR-10391	XLOC_185040
ssc-miR-10391	XLOC_040657
ssc-miR-10391	ENSSSCG00000054093
ssc-miR-10391	XLOC_000077
ssc-miR-10391	ENSSSCG00000042107
ssc-miR-10391	XLOC_139943
ssc-miR-10391	XLOC_153818
ssc-miR-10391	XLOC_039716
ssc-miR-125a	XLOC_129395
ssc-miR-125a	ENSSSCG00000058589
ssc-miR-130b-5p	ENSSSCG00000059956
ssc-miR-143-3p	ENSSSCG00000058289
ssc-miR-143-3p	ENSSSCG00000046729
ssc-miR-143-3p	ENSSSCG00000058575
ssc-miR-183	ENSSSCG00000044318
ssc-miR-183	ENSSSCG00000059956
ssc-miR-183	ENSSSCG00000059385
ssc-miR-185	ENSSSCG00000058289
ssc-miR-185	ENSSSCG00000036815
ssc-miR-185	XLOC_198742
ssc-miR-185	ENSSSCG00000049480
ssc-miR-185	XLOC_112229
ssc-miR-185	ENSSSCG00000049325
ssc-miR-194a-3p	ENSSSCG00000039561
ssc-miR-194a-3p	ENSSSCG00000059956
ssc-miR-194a-3p	ENSSSCG00000049539
ssc-miR-194a-3p	ENSSSCG00000052416
ssc-miR-194a-3p	ENSSSCG00000054716
ssc-miR-194a-3p	ENSSSCG00000049464
ssc-miR-194a-3p	ENSSSCG00000046083
ssc-miR-194a-3p	ENSSSCG00000049325
ssc-miR-194a-5p	ENSSSCG00000059956
ssc-miR-194b-3p	ENSSSCG00000044318
ssc-miR-194b-3p	ENSSSCG00000059956
ssc-miR-194b-5p	ENSSSCG00000059956
ssc-miR-194b-5p	ENSSSCG00000059385
ssc-miR-224	ENSSSCG00000058289
ssc-miR-224	ENSSSCG00000048122
ssc-miR-224	ENSSSCG00000036815
ssc-miR-2320-5p	XLOC_138708
ssc-miR-2320-5p	ENSSSCG00000049480
ssc-miR-2320-5p	XLOC_129395
ssc-miR-2320-5p	ENSSSCG00000055016
ssc-miR-2320-5p	ENSSSCG00000049199
ssc-miR-2366	ENSSSCG00000049199
ssc-miR-24-3p	ENSSSCG00000052109
ssc-miR-24-3p	ENSSSCG00000055016
ssc-miR-24-3p	XLOC_137534
ssc-miR-24-3p	XLOC_172878
ssc-miR-24-3p	XLOC_153521
ssc-miR-26b-3p	ENSSSCG00000058289
ssc-miR-26b-3p	ENSSSCG00000046729
ssc-miR-28-5p	ENSSSCG00000041050
ssc-miR-28-5p	ENSSSCG00000051862
ssc-miR-30b-3p	ENSSSCG00000041523
ssc-miR-30b-3p	ENSSSCG00000039561
ssc-miR-31	ENSSSCG00000059385
ssc-miR-324	XLOC_047548
ssc-miR-324	ENSSSCG00000059685
ssc-miR-328	ENSSSCG00000059956
ssc-miR-330	XLOC_080642
ssc-miR-339	ENSSSCG00000041050
ssc-miR-339	ENSSSCG00000044939
ssc-miR-339	ENSSSCG00000042107
ssc-miR-339	XLOC_185040
ssc-miR-339	XLOC_112799
ssc-miR-339-5p	ENSSSCG00000041050
ssc-miR-339-5p	ENSSSCG00000044939
ssc-miR-339-5p	ENSSSCG00000042107
ssc-miR-339-5p	XLOC_185040
ssc-miR-339-5p	XLOC_112799
ssc-miR-342	ENSSSCG00000049350
ssc-miR-361-3p	ENSSSCG00000049539
ssc-miR-361-3p	ENSSSCG00000059956
ssc-miR-361-3p	ENSSSCG00000049325
ssc-miR-361-3p	XLOC_185213
ssc-miR-361-3p	ENSSSCG00000049350
ssc-miR-423-5p	ENSSSCG00000049325
ssc-miR-423-5p	ENSSSCG00000059956
ssc-miR-423-5p	ENSSSCG00000039561
ssc-miR-4334-3p	ENSSSCG00000041050
ssc-miR-4334-3p	ENSSSCG00000042107
ssc-miR-4334-3p	XLOC_185040
ssc-miR-4334-3p	ENSSSCG00000061372
ssc-miR-4334-3p	XLOC_112799
ssc-miR-4334-3p	XLOC_186731
ssc-miR-503	ENSSSCG00000051325
ssc-miR-503	ENSSSCG00000041180
ssc-miR-532-3p	ENSSSCG00000059385
ssc-miR-532-3p	XLOC_047395
ssc-miR-532-3p	ENSSSCG00000039561
ssc-miR-7144-5p	ENSSSCG00000055215
ssc-miR-7144-5p	XLOC_098242
ssc-miR-769-3p	ENSSSCG00000044588
ssc-miR-874	ENSSSCG00000041523
ssc-miR-874	ENSSSCG00000049539
ssc-miR-874	ENSSSCG00000059956
ssc-miR-874	ENSSSCG00000039561
ssc-miR-874	ENSSSCG00000049325
ssc-miR-874	XLOC_083318
ssc-miR-874	ENSSSCG00000049464
ssc-miR-874	ENSSSCG00000054716
ssc-miR-98	ENSSSCG00000058289
ssc-miR-98	ENSSSCG00000051325
X_44574	ENSSSCG00000053803
X_44574	ENSSSCG00000042325
